# Supplementary material
Source: PubMed Central journal article supplement (PMC7703540)
Supplement: pnas.2005545117.sapp.pdf [file pnas.2005545117.sapp.pdf]

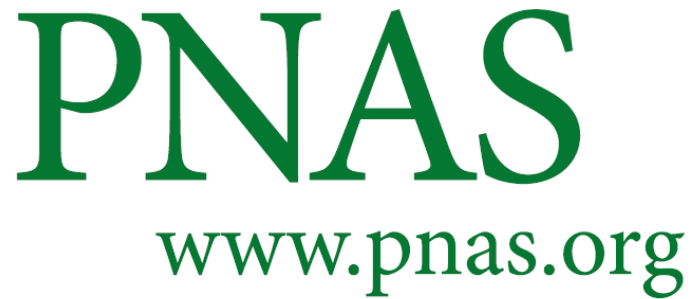

Supplementary Information for

**The evolutionary origin and domestication history of goldfish (*Carassius auratus*)**

Duo Chen, Qing Zhang, Weiqi Tang, Zhen Huang, Gang Wang, Yongjun Wang, Jiaxian Shi, Huimin Xu<sup>b</sup>, Lianyu Lin<sup>b</sup>, Zhen Li<sup>b</sup>, Wenchao Chi, Likun Huang, Jing Xia, Xingtian Zhang, Lin Guo, Yuanyuan Wang, Panpan Ma, Juan Tang, Gang Zhou, Min Liu, Fuyan Liu, Xiuting Hua, Baiyu Wang, Qiaochu Shen, Qing Jiang, Jingxian Lin, Xuequn Chen, Hongbo Wang, Meijie Dou, Lei Liu, Haoran Pan, Yiying Qi, Bin Wu, Jingping Fang, Yitao Zhou, Wan Cen, Wenjin He, Qiujin Zhang, Ting Xue, Gang Lin, Wenchun Zhang, Zhongjian Liu, Liming Qu, Aiming Wang, Qichang Ye, Jianming Chen, Yanding Zhang, Ray Ming, Marc Van Montagu, Haibao Tang, Yves Van de Peer, Youqiang Chen, and Jisen Zhang

Zhen Huang, Marc Van Montagu, Haibao Tang, Yves Van de Peer, Youqiang Chen, and Jisen Zhang

E-mail: zhuang@fjnu.edu.cn; marc.vanmontagu@ugent.be; tanghaibao@gmail.com; yves.vandepeer@psb.ugent.be; yqchen@fjnu.edu.cn; zjisen@fafu.edu.cn

**This PDF file includes:**

Supplementary Text  
Supplementary Materials and Methods  
Figures S1 to S62  
Tables S1 to S14  
Legends for Datasets S1 to S12  
SI References

**Other supplementary materials for this manuscript include the following:**

Datasets S1 to S12

## SUPPLEMENTARY TEXT

### History of goldfish domestication

A recent study showed that common carp (*Cyprinus carpio*) aquaculture in Neolithic China dates back 8,000 years (1) because fish and rice produce protein and carbohydrates, respectively, to provide an overall balance in the ancient Chinese diet. Similar to common carp, crucian carp (*Carassius auratus*) belongs to the family *Cyprinidae* and is one of the most important farmed fish with a global aquaculture production of 2.91 million tons in 2015 (2). The fertile region of China has been called “the hometown of rice and fish” (Chinese: 鱼米之乡), with the fish mostly indicating common carp, crucian carp and grass carp. Therefore, crucian carp has long been a popular food fish in East China and has been taken from the wild as food for several millennia.

Goldfish (*Carassius auratus*) was domesticated in ancient China from crucian carp. According to ancient Chinese literature, goldfish with red or xanthic scales were reported in the Jin dynasty period (AD 265-420) in a lake near Mount Lu (Jiangxi Province, southwestern China) (3, 4). These records suggested that the mutation of xanthic scales was among the first steps of artificial selection for goldfish. Because goldfish have strong adaptability, the aquaculture system has already been well established for populations of goldfish. The natural mutant of fish showing color variation would be retained as ornamental fish, which would eventually evolve into the goldfish we know today, while the wild-type fish could still serve as food.

It is likely that the strength and efficiency of artificial selection were highly limited before the Tang Dynasty (AD 618-906). Buddhism was disseminated to China from India approximately 100 AD, and one of its more important tenets is respect for all forms of life. The Tang dynasty is the Golden Age of Chinese culture and civilization with prosperous Buddhism. Goldfish aquaculture in the 'ponds of mercy' at numerous Buddhist temples and “fish sanctuaries” were popular during that period (3). Therefore, the goldfish research community assumed that preliminary phases of goldfish domestication and systematic breeding efforts started during the Tang Dynasty.

In the Song Dynasty (AD 960-1279), the domestication of goldfish was considered an important aspect of the life of royal and noble families and rapidly ascended to popularity. The Southern Song Emperor Zhao Gao (AD 1107-1187) was a goldfish enthusiast and ordered the collection of gold and silver fish for the imperial palace in Hangzhou (Zhejiang Province). The favor of imperial family had a strong influence on the noble class, and the goldfish became the "Royal fish." The artificial selection and breeding for goldfish to meet fashionable demands of noble class became highly profitable.

The Ming dynasty was also a booming period of time for goldfish breeding due to technical development and innovation for ceramic manufacturing. The production of ceramics of different sizes makes the control of breeding easier. The goldfish were found

to be painted in ceramic Vase during the Jiajing period (1521–1567) of the Ming dynasty ([https://en.wikipedia.org/wiki/Chinese\\_ceramics](https://en.wikipedia.org/wiki/Chinese_ceramics)). The famous new variants, eggfish (or ‘dorsal-less’ goldfish), were depicted in Chinese paintings dated 1429 (5), and the twin-tail goldfish were first documented in 1,596 (6). It is likely that the introduction of goldfish to Japan from China via Korea occurred in 1502 or 1620 (7), and the introduction to Europe via Macao by the Portuguese occurred in the 17th century (8).

The period from the beginning of the Qing (Ch'ing) dynasty (1644 -1912) to 1954 was called “The Era of Conscious Artificial Selection” by Chen (6). The famous Sauvigny scroll in 1772 was painted by Chinese artists, and 92 goldfish variants, including telescope eye and tumbler goldfish, were represented (9). After the Opium War, Chen recorded approximately ten new varieties, including the hooded goldfish lionhead, tigerhead and goosehead, from 1848-1925 (3).

During the twentieth century, the breeding of goldfish has attracted little attention in China. However, the accumulation of genetic mutations in goldfish served as an enlightenment for modern genetic studies in China by Shisan Chen and Japan by Yoshiichi Matsui dating back to the beginning of the 1900s. In these two decades, goldfish has revived popularity following the fast-growing economy in China. In southern China, Fuzhou city has declared to become the “hometown of goldfish” in China. At least two hundred goldfish breeding farms were located in the outskirts of Fuzhou, which produced millions of goldfish that are sold and delivered to all over the world.

### **Goldfish varieties and key morphological traits**

Based on the phenotype, goldfish are classified into four main types according to the Chinese tradition. 1) Common goldfish, also called grass goldfish (crucian, Chinese pronunciation “Cao”-草), is the original goldfish that has no unusual anatomical features, which include the common goldfish, Shubunkin and comet goldfish. 2) Wen goldfish has a fancy tail with dorsal fin, the classic type contained Fantails and Veiltails (“Wen”-文 is also the name of the characteristic head growth on such strains as oranda and lionhead). 3) Dragon eye goldfish. These goldfish typically display extended eyes, e.g., black moor, bubble eye, and telescope eye. 4) Egg goldfish have no dorsal fin with an 'egg-shaped' body, e.g., lionhead.

In this study, we collected 185 goldfish varieties covering the major phenotypes of modern goldfish varieties from all over China, including 9 common goldfish, 87 Wen goldfish and 89 egg goldfish. Eighty-seven Wen goldfish included 53 Chinese-ranchu, 23 eggfish-lionhead and 13 egg-pompon, and 89 egg goldfish contained 23 telescope, 16 Wen-pompon and 46 Wenyu-Oranda.

The goldfish mainly has three color components: melanin, xanthic pigments and guanine. Melanin produces darker components of color, including black, brown (chocolate), and gray; xanthic pigment cells generate red, orange, and yellow shades; and



the absence of guanine in the other two pigment cell types results in a white or silvery color. We scrutinized the coloration of 185 goldfish: 32 red/yellow, 24 red/white, 9 white, 19 black, 12 black/red, 13 chocolates, 2 blue/chocolate, 6 blue, 1 blue/white, and 2 lilacs. Based on the observation of body conformation of the 185 stains, 9 were normal long-bodied goldfishes, and 176 were short-bodied and egg-shaped goldfishes. In addition, 43 of them were observed in the “dragon” eye, including 31 telescope, 6 celestial, and 6 bubble-eye, and 102 of them had a characteristic hood in the head region. More details of the distribution of morphological traits of the collected samples are provided in the *SI Appendix* (Table S13 and S14; Dataset S2).

### **Collection of wild crucian carp**

Jiangxi Province was first recorded as the original region of the red crucian carp, Zhejiang Province was the location of the political center of the Southern Song Dynasty, Jiangsu Province was the prosperous area in China since the Tang Dynasty, and Fujian Province was considered to be the hometown for modern goldfish breeding. Therefore, we collected 16 wild crucian carps from the enclosed waters of the potential area of goldfish origin. Of these samples, two were collected from each of the provinces Zhejiang, Jiangxi, and Henan, the likely area of the goldfish origin, one each from of the provinces Jiangshu, Shangdong, and Heilongjiang, and seven from the Fujian Province. More details of the geographical distribution of the collected samples are provided in *SI Appendix* (Fig. S26, Table S13, Datasets S1 and S2).

### **Characterization of the subgenomes in goldfish**

In a recent study, phylogeny based on mitochondrial and nuclear DNA sequences revealed that the Barbinae species could be divided into two subgroups and were the closest diploid of the goldfish (10). To identify the potential diploid progenitors of *C. auratus*, we performed whole genome sequencing for six representative Barbinae species, including *P. semifasciatus*, *H. vernayi*, *M. arginatus*, *H. macrolepidota*, *B. schwanenfdi* and *B. melanopterus* (*SI Appendix*, Fig. S9 and S10). A total of 78.0~105.4 million reads from the six species were aligned to the goldfish genome, and 40% on average were mapped to the goldfish genomes. Of the mapped reads, 70.11%~84.52% were mapped to one set of homoeologous chromosomes, which were defined as subgenome A, and another set of homoeologous chromosomes was defined as subgenome B. We also aligned the Illumina short reads from two relative species, *D. rerio* and *C. idella*, and the results showed that the two subgenomes presented similar mapping patterns, i.e., the Illumina short reads. with no preference towards either subgenome A or B (*SI Appendix*, Fig. S10, S17, and S18). These results supported that the Barbinae species is likely the diploid progenitor of subgenome A.

RepeatMasker (11) output was used to analyze the distribution differences of each repeat family on the two subgenomes. We therefore defined that a repeat family was enriched in a subgenome by the criterion of  $A/(A+B)-B/(A+B) \geq 0.8$  or  $B/(A+B)-A/(A+B) \geq 0.8$ , resulting in one and six A-specific and B-specific repeat families, respectively, which are the hAT-Ac and TcMar-Tc1 elements, respectively. hAT-Ac was significantly more abundant on the A than on the B subgenome (Fig. S11). To predict the activity time of the A-specific repeat family, subfamilies were computed manually as follows. MAFFT (12) was used to align all sequences in the A-specific family, whereafter phylogenies were constructed with FastTree. In total, three A-specific subfamilies with at least 10 copies of 150 bp or longer were identified (Fig. S12). We aligned the filtered subfamily sequences with MAFFT (12), obtained conservative sequences based on these sequences, and calculated the distance from each sequence. The distances were then adjusted for multiple substitutions according to the Jukes-Cantor formula and a density plot was plotted for the A-specific repeat families (Fig. S13). The burst of the A- and B-specific TE activities occurred independently in the progenitors during that period.

The gene cluster analysis of the two subgenomes showed that 11,876 gene clusters (accounting for 31,572 genes) were shared in subgenomes A and B, and 1,810 (accounting for 3,295 genes) gene clusters were specific in subgenome A and 2,240 (accounting for 1,354 genes) in subgenome B (*SI Appendix*, Fig. S16). The duplicate retention rates are ~89% and ~83% for subgenomes A and B, respectively. To characterize the expression features of *C. auratus*, we performed RNA-seq profiling for ten tissues, including spleen, scale, muscle, mid-kidney, head kidney, gut, gill, dorsal fin, atrium and testis. We carried out comparative analysis of the genome-wide transcriptional levels for subgenomes A and B based on the gene expression levels of 16,362 homoeologous gene pairs in these 10 tissues to investigate the homoeologous gene expression patterns (*SI Appendix*, Fig. S19; Dataset S10). To minimize noise from low-expression genes, we only retained the homoeologous gene pairs that have at least one gene with expression of  $FPKM \geq 10$  (Fig. 1c; *SI Appendix*, Fig. S20). We defined homoeologous gene pairs with greater than twofold change within a pair with the higher-expressed gene as the dominant genes and others as recessive genes. The results showed that 7,951 (48.6%) were dominant genes in at least one of these ten tissues. Of the 7,951 homoeologous gene pairs, 5,010 presented dominant expression in subgenome A, and 3,828 were dominant expressed in subgenome B (Fig. 1c); 887 homoeologs were swinging dominant bias either in subgenome A or subgenome B. Further analysis revealed that 4,123 and 2,941 homoeologs were exclusively dominant in subgenomes A and B in the 10 tissues, respectively, and 170 and 121 homoeologs were dominantly expressed in subgenomes A and B in all 10 tissues (Fig. 1c; *SI Appendix*, Fig. S19 and S20), respectively.

The homoeologous expression bias exhibited asymmetric expression patterns between subgenomes A and B, and the genome-wide expression level dominance was

biased towards subgenome A in the allotetraploid *C. auratus* genome. GO term enrichment showed that the dominantly expressed homoeologs of subgenome A were primarily enriched in the “oxidation-reduction process”, “acid-amino ligase activity”, “actin binding”, “glycolytic process” and “oxidoreductase activity” terms, while those of subgenome B were enriched in the “Protein folding”, “Oxidation-reduction process” and “Cellular response to xenobiotic stimulus” terms (*SI Appendix*, Fig. S21). KEGG pathway analysis indicated that dominantly expressed homoeologs of subgenome A mainly participate in “Insulin signaling pathway”, “Leukocyte transendothelial migration”, “Neurotrophin signaling pathway” and “HIF-1 signaling pathway”, while the homoeologs dominantly expressed in subgenome B primarily participate in “Tight junction”, “Chemokine signaling pathway” and “Complement and coagulation cascades” pathways (*SI Appendix*, Fig. S22 and Dataset S12). These results suggested the functional divergence between the two subgenomes in the goldfish.

### **Sex chromosome**

In *Cyprinidae*, the mechanism of sex determination has not been clearly studied. The high-density meiotic map SATmap was used to identify the sex determination region. Most of chromosome 16 carried a strong signal with a broad peak around the centromere, but no specific region can be identified as a sex-determination region (13). Coincidentally, the identity of the sex determination chromosome(s) in grass carp is still unclear, although the genetic map was used (14). In zebrafish, the long arm of zChr4 was suggested to be the sex-associated region in zebrafish zChr4 (13, 15), and very recently, a relatively large nonrecombining region (~11.7 Mb) on the goldfish linkage group 22 (LG22) that contained a high density of male-biased genetic polymorphisms was also detected on ChrA22 (~19.9 Mb) (16). We found that *Amh* considered a putative male sex-determining gene occurred also in ChrA22 (Cau.A22G0011390) of goldfish based on the homology analysis. In our study, we used a female fish (XX) for the whole-genome sequencing and assembly. The analysis of the sex chromosomes was preliminary.

Goldfish were suggested to have a sex determination system with male heterogametic (XX/XY) (17). In addition to genetic factors, the sex determination system was also controlled by the environmental factors in goldfish, for example, female-to-male sex reversal occurred under the high temperatures (17). In this study, in order to identify the sex-determination candidate region, we resequenced 3 male and 3 female goldfish individuals. In theory, if the goldfish have mature sex chromosomes, using the reference male genome that we generated, the whole genome shotgun (WGS) reads of males are supposed to have higher depth of coverage (approximately twice) for the X sex-chromosome (regions) than the reads from females (X/Y). A total 323.56 million reads from the male fish and 403.60 million reads from female fish were respectively mapped the reads to the reference genome using Bowtie2 (18) with default parameters, respectively. We scrutinized the potential sex-related genomic regions in the goldfish genome which

have reported in zebrafish, grass fish and goldfish (13, 14, 19). However, we did not observe any chromosome with expected sex chromosomal patterns (Fig. S44). In the future, the *de novo* assembly of the female genome combined with the genetic map and the male/female goldfish resequencing could provide further evidence for determining the sex chromosome in goldfish.

Remarkably, the long arm of the homeologous chromosome pair, ChrA4/ChrB04 (20.49~32.10 Mb in ChrA04, 15.44~41.40 Mb in ChrB04), was found to lack synteny both between the chromosome pair (*SI Appendix*, Fig. S15, S45, and S46), as well as showing only slight collinearity with the presumed homologous zebrafish chromosome 4 (Fig. S47). Despite the slight collinearity between the long arms of ChrA04/ChrB04 in goldfish and zChr04, these chromosomes in zebrafish and goldfish are very similar to each other in terms of genomic content including NLRP genes, TEs (13, 15), indicating this highly repetitive chromosomal regions originated before the divergence of zebrafish and Cyprininae subfamily. Since the long arm of chromosome 4 in zebrafish was suggested to be a sex chromosome, ChrA04/ChrB04 are thus presumed to be the sex chromosomes in goldfish due to this implied orthology, despite a general lack of collinearity. Of note, as the allotetraploid species, the pairs of homoeologs potential sex chromosomes indicated a different genetic system from the diploid species for sex determination and segregation in goldfish. However, it is possible that either ChrA04 or ChrB04 is the sex chromosome, and thus goldfish could have similar genetic system as diploid.

In these regions, 202 and 404 genes were annotated in ChrA04 and ChrB04, respectively, of which 38 (18.8%) and 184 (45.5%) genes in ChrA04 and ChrB04 were duplicated genes, respectively. Among those genes, a total of 10 and 44 are duplicated NLRP genes, respectively, which have been considered to have putative functions in innate immunity (20), indicating disease resistance associated with these genomic regions. Furthermore, high levels of TEs (52.1% in ChrA04 and 50.2% in ChrB04, compared with the genome average of 37.22%) exist in these regions with a majority of Class II type, including a large number of DNA/hAT and DNA/CMC-EnSpm elements (Fig. 2; *SI Appendix*, Fig. S45). Class II type transposons are typically associated with heterochromatin, with mutations rapidly accumulating in these regions leading to noncollinearity to closely related chromosomes (Fig. S47). However, the enrichment of genes responsible for innate immunity suggests that this rapidly evolving region nonetheless carries important biological functions (Fig. S48 and S49). Since immunity-related genes are often under strong positive selection in various taxa (21), for example, due to the ‘arms-race’ with infectious pathogens, their location in a rapidly evolving chromosomal segment may not be coincidental and might be considered a selective advantage. We hypothesize that the highly divergent chromosome segments on ChrA04 and ChrB04 may serve an important role that might have facilitated the adaptation of Cyprinidae species to different natural habitats that often contain a variety of pathogens.

## **Evolutionary history of goldfish**

The availability of the reference genomes for *Cyprinus carpio* (22), grass carp (23), and zebrafish (13), as well as the current genome, enabled us to reconstruct the history of chromosomal evolution of goldfish within the Cyprinidae family. Based on Ks value estimates, zebrafish diverged from the last common ancestor (LCA) of *Cyprinus carpio*, *Carassius carassius*, and *Ctenopharyngodon idellus* ~32.8–36.8 MYA, and segmental inversions in ChrA04\ChrA14\ChrA19 occurred after the divergence of zebrafish and the lineage leading to the subfamily Cyprininae, as the orientation of this chromosomal fragment was conserved among the extant *Cyprininae* genomes examined to date (Fig. 2c and d; *SI Appendix*, Fig. S15, Fig. S23, S24). The grass carp lineage split off from the LCA of *Cyprinus carpio* and crucian carp ~21.1-23.7 MYA followed by the fusion of corresponding ancestral zebrafish Chr10 and Chr22 to Chr24 (*SI Appendix*, Fig. S24 and S25), resulting in a basic chromosome number of  $n = 24$  (2).

Goldfish had originally been classified as common carp (*Cyprinus auratus*) by Linnaeus in 1758 and, later, reclassified as *Carassius auratus*, considering that the phenotype was closer to crucian carp than to common carp (24). Based on these results, we can infer that goldfish originated more probably from crucian carp than from common carp. After exclusion of common carp, phylogenetic analysis of 201 individual crucian carp and goldfish samples by means of a set of 4,842,951 biallelic single-nucleotide polymorphisms (SNPs) revealed that all the wild crucian carp samples clustered together and were clearly separated from goldfish (Fig. 2a-c; *SI Appendix*, Fig. S29 and S30). The principal component analysis (PCA) of the total SNP variation also confirmed the results; because both of the largest principal components (PC)-PC1 (11.29%) and PC2 (7.87%) distinguished crucian carp from goldfish (Fig. 2a).

### **Long noncoding transcripts**

FEELnc tool v0.1.1 was employed for classifying non-coding RNAs with the default parameters, which compares the genomic location and transcript orientation with respect to the protein-coding RNA (25). The long noncoding transcripts were classified into 4,628 with intergenic locations and 4,713 with genic locations and further divided into multiple subtypes according to recently proposed definitions (25) (*SI Appendix*, Table S8).

### **Genes associated with selective sweeps in teleosts or other organisms**

Several other genes associated with selective sweeps have reported functions in teleosts or other organisms, such as genes involved in embryonic development (*eif3f*) in zebrafish (26) and mouse (27); colorectal cancer in humans (*NAV3*) (28); regulation of autophagy in cone photoreceptors in zebrafish (*Arf6a*) (29); regulation of zebrafish primitive and definitive hematopoiesis (*Ak2*) (30); EXTL3 mutations causing skeletal dysplasia, immune deficiency, and developmental delay (31); causing T cell immune deficiency in zebrafish (*zap70*) (32), mechanotransduction in sensory hair cells (*pcdh15*) (33), and a planar cell polarity effector (*Nhsl1b*) in zebrafish facial branchiomotor neurons (34).

### **Gene flow of goldfish population**

Gene flow from the Chinese Ranchu to common goldfish (weight = 0.187) was due to the modern Chinese Ranchu, which originated from Japanese Ranchu containing the genetic backgrounds of Japanese Wakin and Jikin in the common goldfish groups. These results demonstrated the significant contributions of Japanese goldfish genetic stocks to modern goldfish breeding due to Japanese goldfish breeding initiatives in the past century.

### **GWAS of eye and color variants in domesticated goldfish**

Telescope eyes have been a symbolic feature of some goldfish in the western world since de Sauvigny published goldfish scrolls in 1780 in Paris (9). Based on 31 cases and 142 controls for telescope eyes, GWAS with a threshold of the top 0.1% revealed 112 genetic loci spanning 11.08 Mb in multiple genomic regions (*SI Appendix*, Fig. S50-52 and Dataset S7). In these regions, 7 genes associated with telescope eyes overlapped with genes associated with dorsal fin phenotypes, but none of them were common to the 393 domesticated candidate genes within the domestication sweeps, indicating that telescope eyes likely emerged after the original domestication of goldfish (*SI Appendix*, Fig. S53). A total of 20 goldfish genes corresponded to 17 zebrafish orthologs whose gene knockout lines display mutant phenotypes associated with eye development, supporting the reliability of these GWAS results in goldfish (Dataset S7). Telescope eyes were thought to be controlled by one or two loci, since a cross with wild goldfish (Funa) gave a segregation ratio of 15:1 (wild-type eyes: telescope eyes) (35). However, in the present study, three genes, i.e., Cau.A01G0001330, Cau.B20G0012610, and Cau.B22G0008190, underlying a strong association peak, were orthologous to the eye development-related genes *ncapg*, *rps29* and *sec13* in zebrafish (*SI Appendix*, Fig. S50). The eye variants in the current study included spherical, ovoid, a truncated cone, and a segmented eye, according to the classifications of Hervey & Hems (36). The observed phenotypes could be explained by telescope-eye phenotypes being under the control of one major genetic locus in addition to several other eye-associated genes with minor effects.

Color mutations are almost a commonplace among ornamental fish, and color represents the earliest trait to have undergone artificial selection in goldfish and has been a target of selection for over 1000 years, resulting in ‘an almost infinite diversity of color’ in goldfish (37). To explore color-associated genes in goldfish, we performed GWAS with three paired case/control datasets including blue coloration compared with red (24 to 32), red compared with partial white and white (33 to 32) and black compared with red (19 to 32), for which 598, 504, and 807 genes, respectively, were in genomic regions associated with the threshold of top 0.1% (*SI Appendix*, Fig. S54-S62 and Datasets S8-S10). At least 60 of these candidate genes have previously been related to pigmentation in zebrafish and vertebrates (Datasets S8-S10). For example, a series of pigment-related genes were located

in the strong association peaks, including an SNW domain-containing protein 1 (Cau.A20G0001720) that regulates the BMP signaling pathway controlling hair pigmentation in humans (38), the endothelin-1 receptor (Cau.B01G0008200) related to pigmentation in cats (39), a cadherin-associated protein (Cau.B01G0009880) involved in melanocyte differentiation, a point mutation in optineurin (Cau.B04G0002560) related to pigment cells in zebrafish (13), a cytochrome c1 (Cau.B06G001201) and an adenylate cyclase related to melanophore development (40-42).

## Discussion

As ornamental fish, the domestication history of goldfish has been impacted by three historical lines, including the contemporary social, religious, and political environments. Goldfish is unique among domesticated animals since it was largely used as a ‘luxury’ item, historically petted by the nobles, riches and royal families, thus subject to shifting aesthetics and tastes over time. Consequently, goldfish breeding differed from the breeding of herd livestock, such as goats (43), sheep (44), cattle (45), and pigs (46), because these animals were under direct selection for common goals, such as yield and quality, that would occur independently in different geographical areas. Goldfish appears to have developed with extensive admixture of different genetic backgrounds, because breeders often wished to develop new lines with novel combinations of anatomical features. Numerous mutations, including the xanthic mutation, the depigmented mutation (*bifactorial mutant*), albinism, eye mutant, narial bouquet mutant, hood mutant, scale variant, and body conformation mutants, have been selected in goldfish populations and spread via admixture.

The selection of the xanthic mutation had been the initial step in goldfish domestication, resulting in a bottleneck for genetic diversity in the goldfish population and in an initial reduction in diversity in some regions through selective sweeps. Afterward, artificial selections based on mutations in large breeding populations, accompanied by hybridization, have since then maintained the morphological diversity via high degrees of polymorphism at many loci (Fig. 4 *a* and *b*).

Several morphological variants in goldfish are inherited in a Mendelian fashion, including transparent scale (47), blue/brown coloration (7), bifactorial mutants (48), albinism (48, 49), recessive transparency (48), and telescope eye mutants (48, 50). These morphological variants are in concordance with the diverse genetic backgrounds of goldfish, as shown by the transparent scale mutant in our study. Such morphological variation in, for example, body conformation and fin size, has evolved under directly strong selection that has consequently facilitated genetic divergence, as shown in the case of the dorsal fin in Wen and Egg goldfish. The diverse selection schemes had a large impact on the genetic landscape of goldfish, with changes affecting a larger number of loci than

expected for other farm animals that had primarily been used for herding and meat consumption.



## SUPPLEMENTARY MATERIALS AND METHODS

**Goldfish materials.** A 12-generation inbred line of a female common goldfish (G-12) was collected from the Chunyuanli Ecological Farm, Minhou County Nantong, Fuzhou, Fujian, China (E119 °13'46.55", N25 °54'44.56") and used for whole-genome sequencing. The collection time was March 10, 2016 with the sample number GF0001.

**Illumina short read sequencing.** Genomic DNA was extracted from blood of goldfish using the DNeasy Blood and Tissue Kit (Qiagen) and used to construct libraries using the NEBNext Ultra DNA Library Prep Kit for 150 bp paired-end sequencing on the Illumina X Ten platform. The raw reads were trimmed using Trimmomatic (51) (v0.36) with default parameters.

**Genome annotation.** Tandem repeats were identified using the Tandem Repeat Finder (TRF) package (52), and unknown TEs were classified using Teclass (53). We also integrated results from LTR\_FINDER (54) and LTRharvest (55) and removed false positives from the initial predictions using the LTR\_retriever pipeline (56). The goldfish genome assembly was annotated by means of homology-based, transcriptome-based, and *ab initio* annotations. For the homology prediction, four representative species were selected, including *C. auratus* (17), *Cyprinus carpio* (57), *C. idellus* (55), and *D. rerio* (23). The protein sequences from these genomes were aligned to the goldfish genome assembly with TBLASTN with an E-value cutoff of 1e-05. GeneWise was used to predict the exact gene structure of the corresponding genomic regions for each BLAST hit. For the transcriptome-based prediction, RNA-Seq and ISO-Seq data were sampled from female and male goldfish. Transcriptome assembly was carried out with both *de novo* and reference-guided Trinity with RNA-Seq (58) data. A high-quality complete transcriptome was obtained through the PacBio pipeline with ISO-Seq data. *Ab initio* genes were predicted by SNAP (59), GENEMARK (60), and AUGUSTUS (61) with repeat-masked genome sequences. We integrated all genes predicted from the three annotation procedures with two rounds of MAKER (62). In the second MAKER (62) run, the predicted gene models with annotation edit distance (AED) scores of 0.25 were extracted for retraining again with SNAP (59), GENEMARK (60), and AUGUSTUS (61), where after the TE-related genes were removed. Finally, the MAKER (62) pipeline generated 56,251 gene models (Table 1). Although different annotation methods may have subtle variations, they generally do not affect the comparative genomics analysis, because in general the different annotation results should be consistent.

**Identification of homoeologous genes and syntenic blocks.** The conserved paralogs of the protein sequences were obtained with BLASTP (E-value  $\leq 1E-5$ ). Homoeologous gene and pairwise collinearity analyses between species were applied by means of MCScanX (<http://chibba.pgml.uga.edu/mcscab2>). At least five genes and  $\geq 70\%$  identity scores were required to identify the syntenic blocks. Alignments were used as an edge to group genes into clusters according to whether it was before or after the carp WGD event. Two genes or gene clusters were merged as described (1).

**Analysis of chromosomal synteny and structure.** Structural comparisons were performed using minimap2 (63) alignment tools, and visual interpretations of dot plots created using D-Genies (64). Gene density and NLRP gene distribution plots were created by RIdeogram package (65) of R program.

**Discrimination of distinct subgenomes.** To discriminate the subgenomes of goldfish, DNA was extracted from the recent diploid Cyprinidae species, *Puntius semifasciolatus*, *Hypsibarbus vernayi*, *Mystacoleucus marginatus*, *Hampala macrolepidota*, *Barbonymus schwanenfdi* and *Balantiochelos melanopterus*, for Illumina sequencing on the HiSeq™ X Ten sequencing platform. In addition, 202.9 million reads of *C. idella*, *D. rerio* and *C. molitorella* were download from NCBI. The Illumina reads for the six species (~12 Gbp) *C. idella*, and *D. rerio* were mapped onto the goldfish genome using Bowtie2 (18, 66), and mapping results were standardized using BEDTools (67) and PYTHON scripts.

**RNA-Seq of *Carassius auratus* tissues.** Total RNA was extracted from *C. auratus* gill, atrium, head kidney, mid-kidney, testis, gut, scale, dorsal fin, muscle, and spleen using TRIzol (Invitrogen, California, USA) reagent following the manufacturer's instructions. RNase-Free DNase I (Takara, China) was used to remove genomic DNA according to the manufacturer's instructions. Approximately 120 Gb transcript data were generated for *C. auratus* using the Illumina HiSeq™ X Ten sequencing platform (Illumina, USA) and processed using the Trimmomatic (v0.36) pipeline (51). FPKM (fragments per kilobase of transcript per million mapped reads) for filtered reads (after removing low-quality reads (Q-value < 20) obtained from all samples were calculated using RESM in Trinity (Dataset S11)(68).

**Analysis of genome expression dominance.** The clean RNA-Seq reads after quality control were mapped onto the *C. auratus* genome using TopHat2 (69). Transcript expression levels of individual genes were quantified using FPKM values using RESM in Trinity (68). Analysis of homoeolog expression dominance was performed between syntenic gene pairs compared to that of homoeolog gene pairs (Dataset S10). To avoid the false positive results, we only selected homoeologous gene pairs having at least one gene with FPKM  $\geq 10$ . Differentially expressed gene pairs with expression differences greater

than twofold were defined as dominant gene pairs. Dominant genes were those with relatively higher transcript expression between dominant gene pairs, and those with lower transcript expression were considered subordinate genes. The rest of the syntenic gene pairs that showed no dominance relationship were classified as codominant genes.

**Read mapping, variant calling, and filtering.** NGS reads of 201 samples were processed for quality control using BBTools (<https://jgi.doe.gov/data-and-tools/bbtools>) with the default parameters, and the clean reads were then imported to map them against our goldfish genome assembly using the Burrows-Wheeler Aligner (BWA) MEM (70) with the parameter `-M -k 30`. The alignments were then sorted using SAMtools (71) (v1.9), and putative PCR-generated duplicates were removed using Samblaster (72). Variants were called for each sample using the GATK (73) (v3.8) HaplotypeCaller and subsequently joint-called across all samples using the GATK GenotypeGVCFs tool.

A subset of 5,202,428 biallelic SNPs in these 201 samples were defined using the following tools and parameters: `vcfutils.pl varFilter` (72) with the parameters `-w 5 -W 10`; GATK Variant Filtration with the parameters `--filterExpression "QUAL < 30 || QD < 2.0 || FS > 60.0 || MQ < 40.0"` `--clusterWindowSize 5 --clusterSize 2`; BCFtools View (74) with the parameters `-m2 -M2`; and then VCFtools (75) with the parameters `--maf 0.05 --max-missing 0.8`.

The marker set was phased by beagle (v5.1) (76) and annotated using SnpEff (77) (v4.3) with our gene annotation for common goldfish. The density of SNP markers was 317 bp per marker, and the Ts/Tv ratio was 1.05. Most of the markers (approximately 40%) are distributed in intergenic regions. We also performed the above procedures and used the same filtering criteria to generate an additional SNP marker set including the previously sequenced 33 *Cyprinus carpio* (78) and our 201 resequenced samples. We used this marker set to clarify the relationships among *Cyprinus carpio*, crucian carp, and goldfish.

**Population structure analysis.** A subset of SNP markers in only 185 goldfish were generated using PLINK to remove the 16 crucian carp samples and to filter SNPs using the parameters `--maf 0.05 --geno 0.2`. Both sets of the above SNP markers were used to conduct PCA and identity-by-state (IBS) calculations in PLINK (79). We used the first four eigenvectors to draw scatterplots. A genetic distance matrix of 1-IBS values was used to construct a minimum evolution phylogeny tree using the FastME program (80) that was visualized with the web service iTOL (81). Analysis of population structure revealed that these 201 samples could be partitioned into four subpopulations (CC, CG, WG, and EG). To perform TreeMix (82) analysis, the per-site allele count (AC) of each group was calculated using PLINK (79) with the `--within` command, and the results were then converted into TreeMix (82) input format using the `plink2treemix.py` script. We then ran TreeMix (82) to construct a maximum-likelihood population tree.

**Selective sweep detection.** Whole genome detection of selective sweeps was conducted using  $F_{st}$  between wild (C16) and domestic (G33) populations, the composite likelihood ratio (CLR) test, and Shannon entropy analysis within G33. The per-site  $F_{st}$  for C16 compared with G33 was estimated using PLINK by scanning with an average 50-kb block size across all chromosomes. The CLR test was implemented in SweepFinder2 (83) for multiple markers across a contiguous grid space. To measure genetic diversity, which could also be interpreted as the degree of chaos per site for the two subpopulations, we used custom R scripts to calculate the relative Shannon entropy of biallelic loci as denoted by  $S'(A)$  in the following formula:

$$S'(A) = \frac{-[p \cdot \ln(p) + q \cdot \ln(q)]}{\ln 2}$$

The top 1% of CLR scores were selected as sweep regions. GO term enrichment analysis was performed for candidate genes located within these sweep regions. TopGO (<http://www.bioconductor.org/packages/release/bioc/html/topGO.html>) was used for GO term enrichment analysis, the REVIGO (84) tool was used to summarize nonredundant GO terms, ClusterProfiler (<http://www.bioconductor.org/packages/release/bioc/html/clusterProfiler.html>) was used to perform KEGG pathway enrichment analysis, and Cytoscape (85) was used to visualize networks of terms based on Jaccard similarity coefficients. Extended haplotype homozygosity (EHH) analysis was performed by the R package rehh (86) around the selected SNPs of representative candidate genes.

**Population parameter estimation.** Genetic diversity ( $\pi$ ) was calculated with the parameters `--window-pi 50000 --window-pi-step 50000`. Tajima's D was estimated with the parameters `--TajimaD 50000`. Both  $\pi$  and Tajima's D also used the parameter `--keep` to choose samples from each group.  $F_{st}$  was calculated with the settings `--fst-window-size 50000 --fst-window-step 50000` and the parameter `--weir-fst-pop` to set groups.

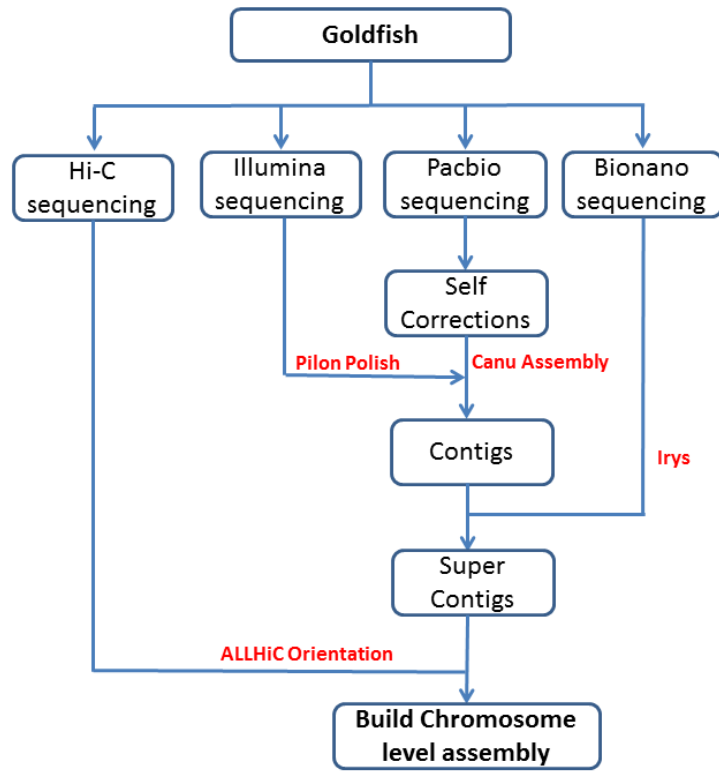

**Fig. S1.** Assembly strategy of goldfish genome.

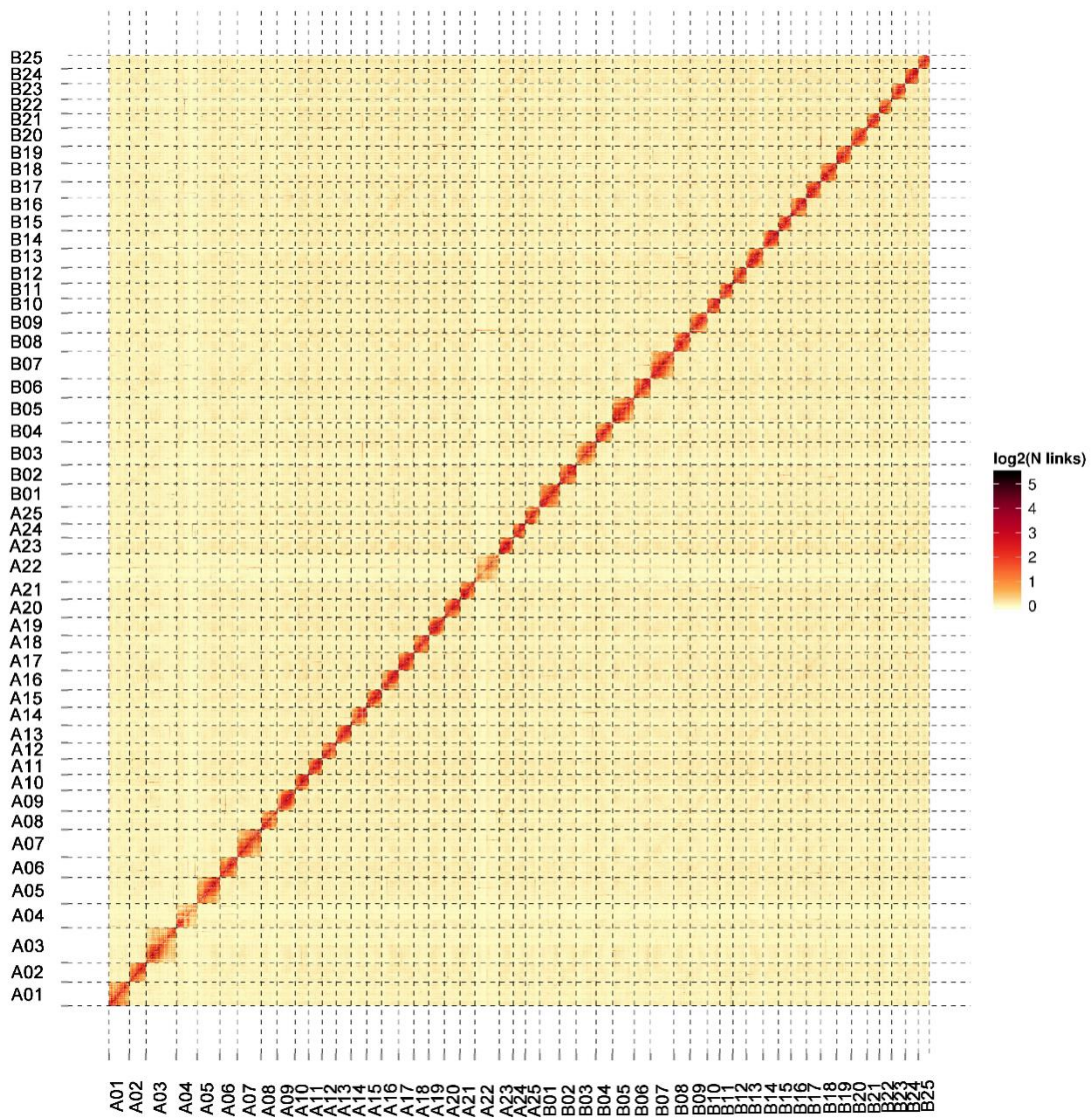

**Fig. S2.** Hic contact map from the goldfish. Genome-wide analysis of chromatin interactions in *C. auratus*.

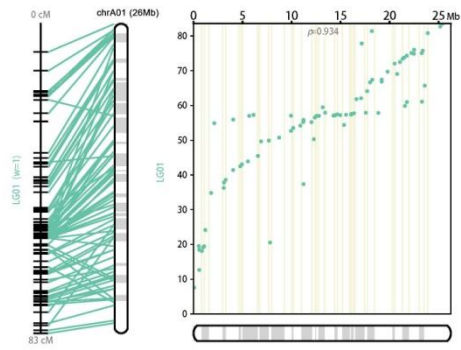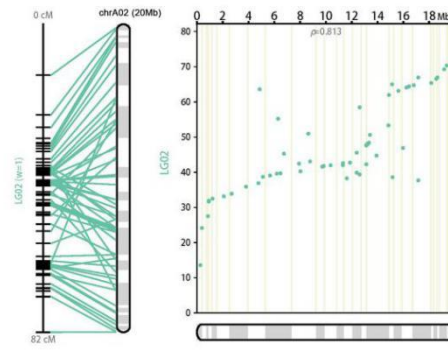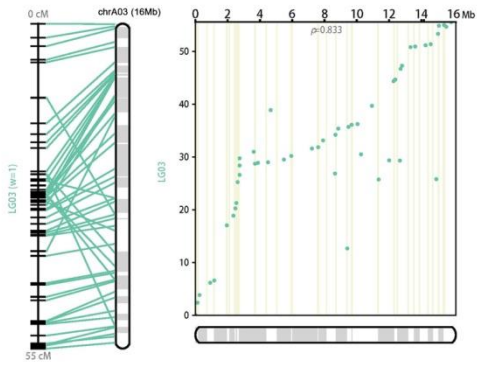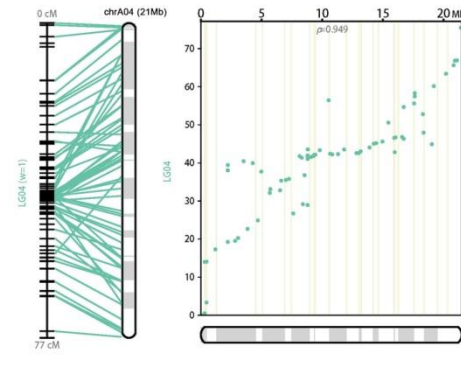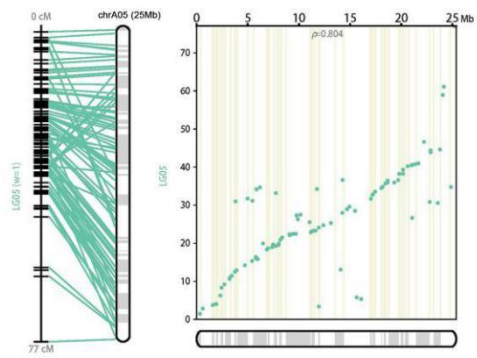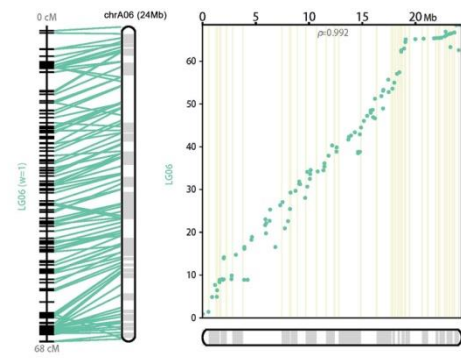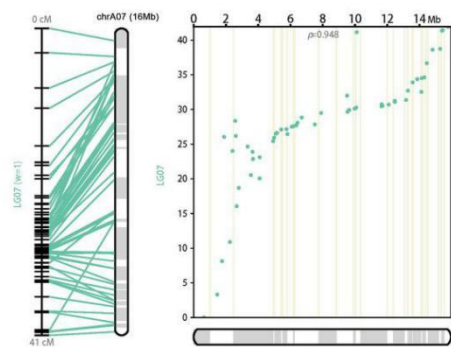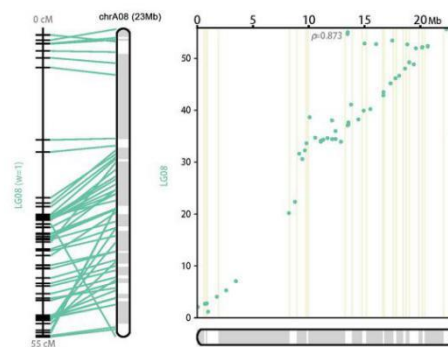



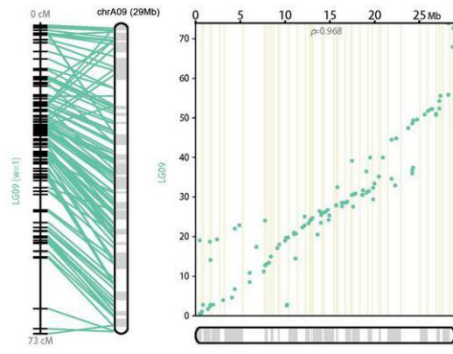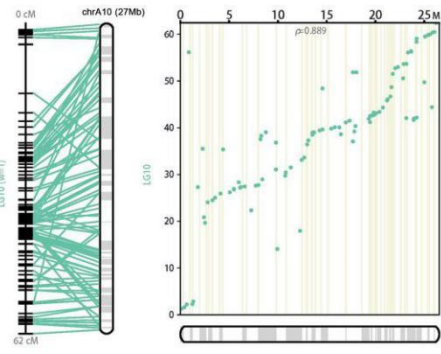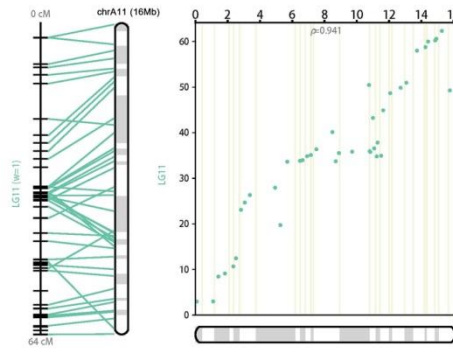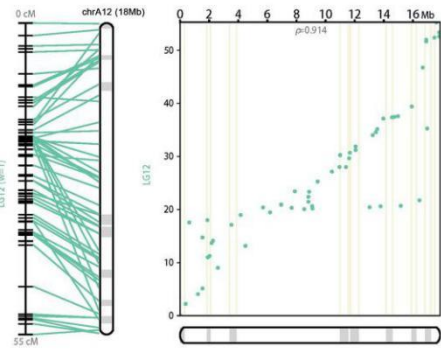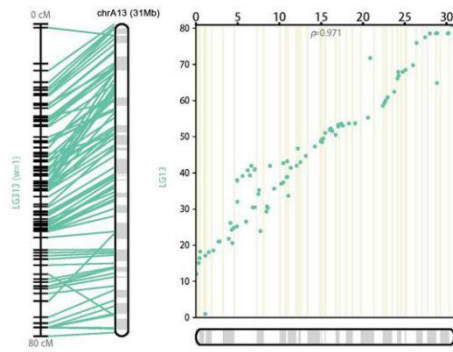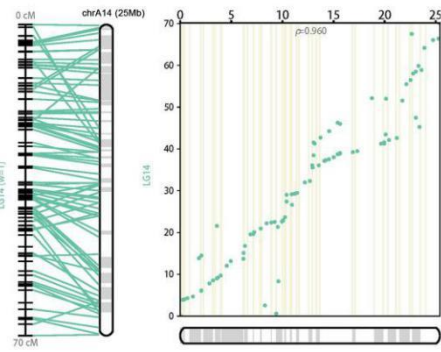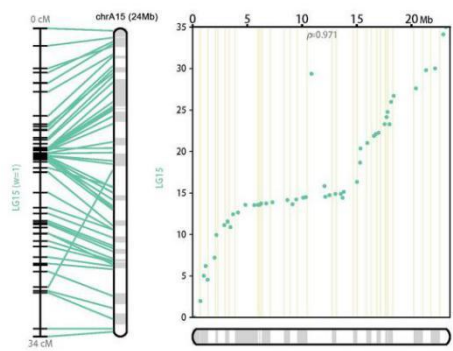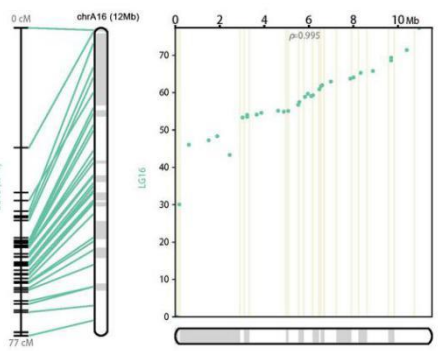



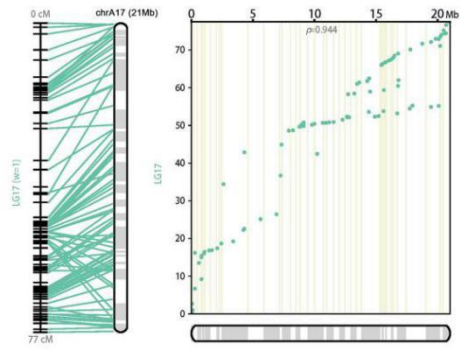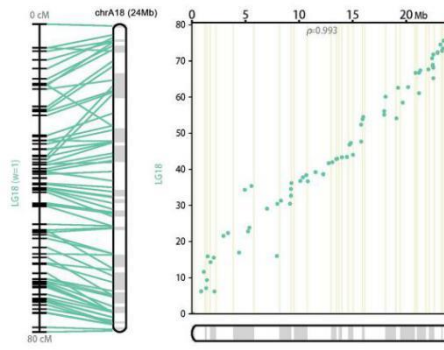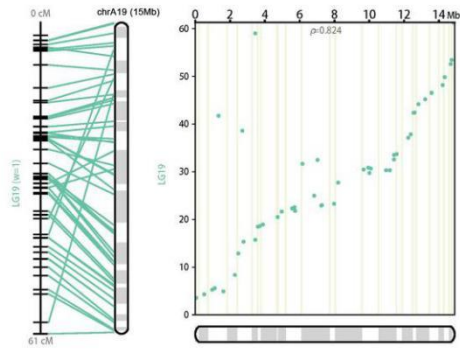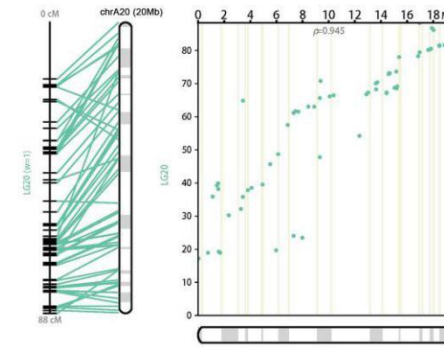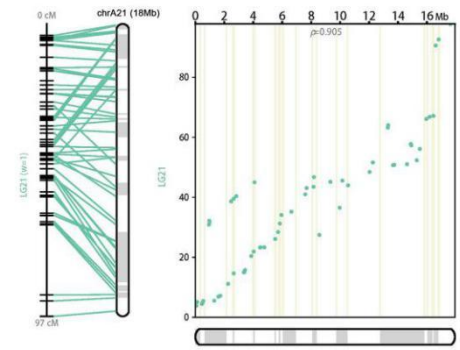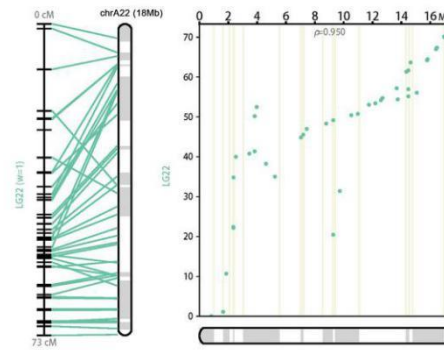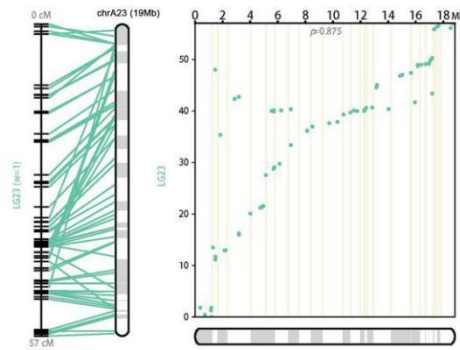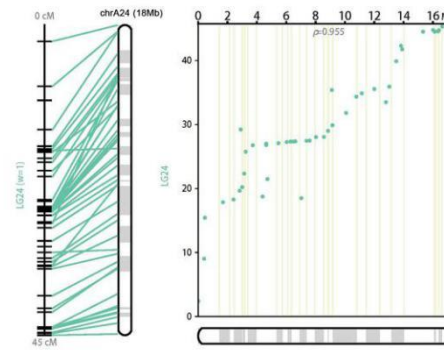

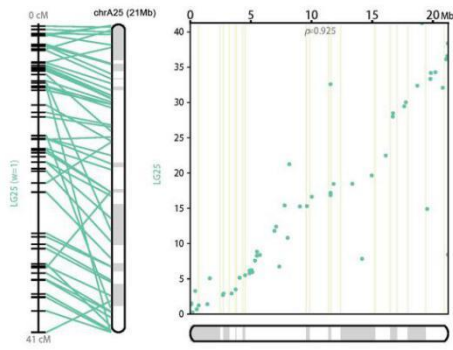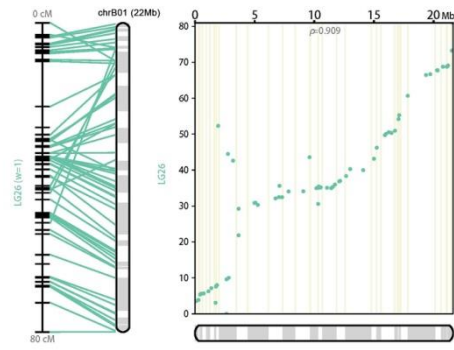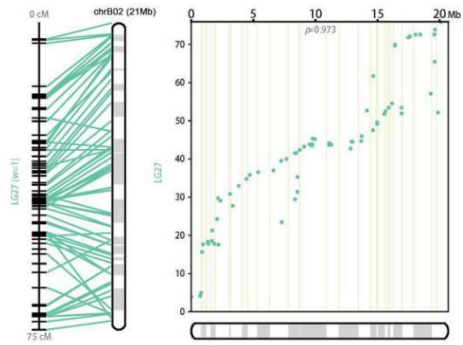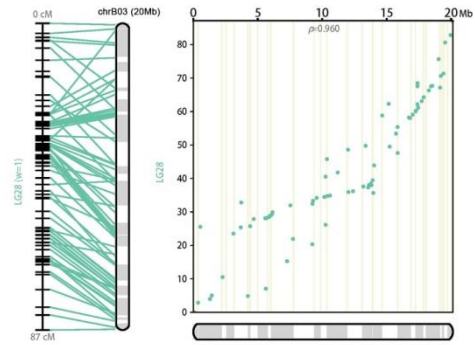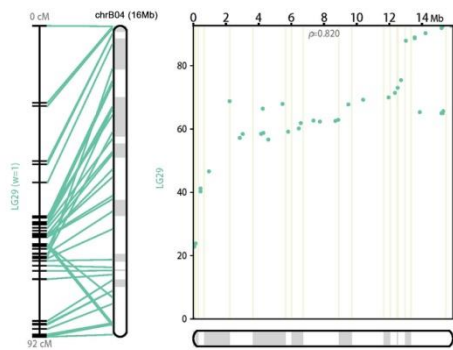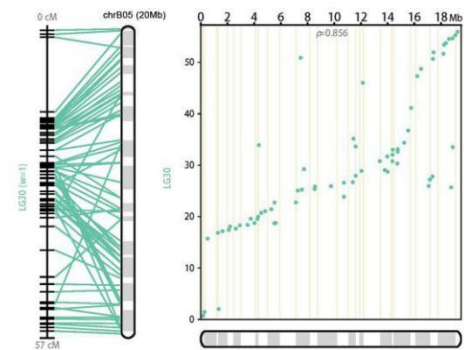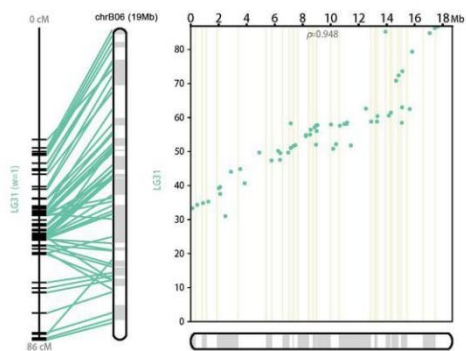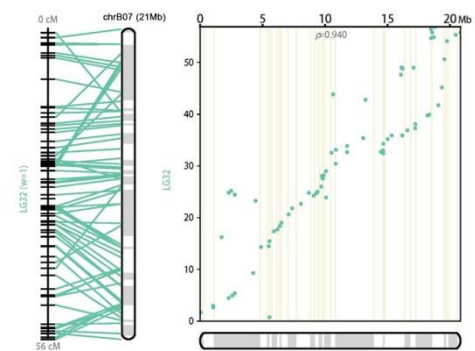

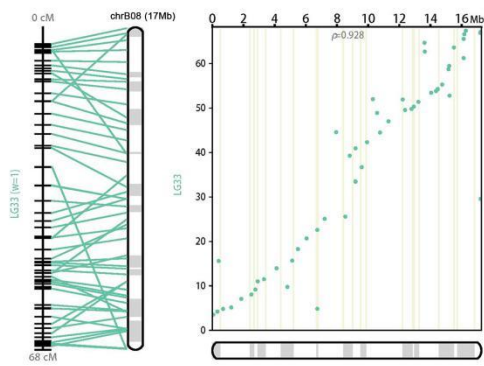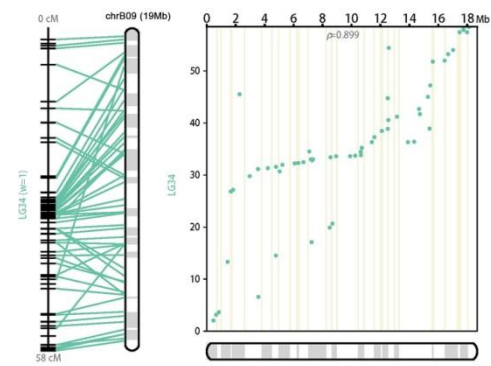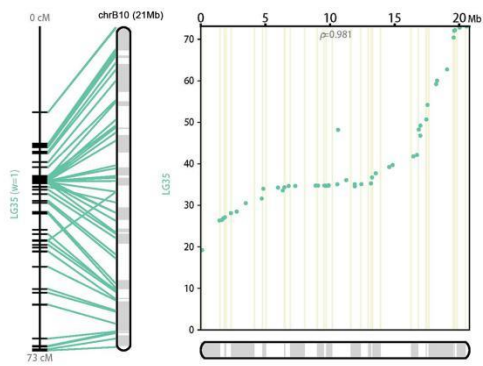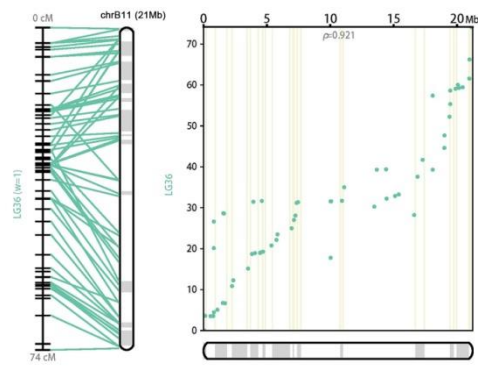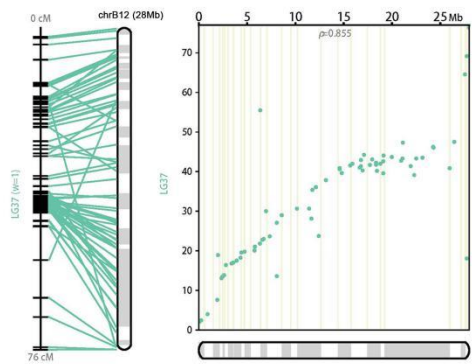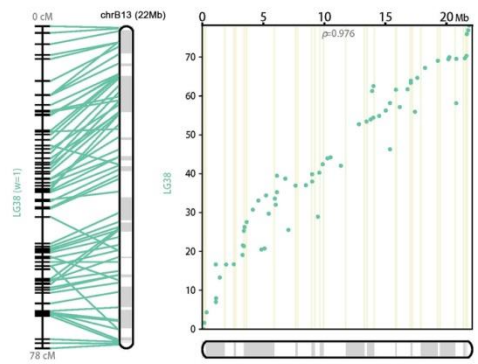

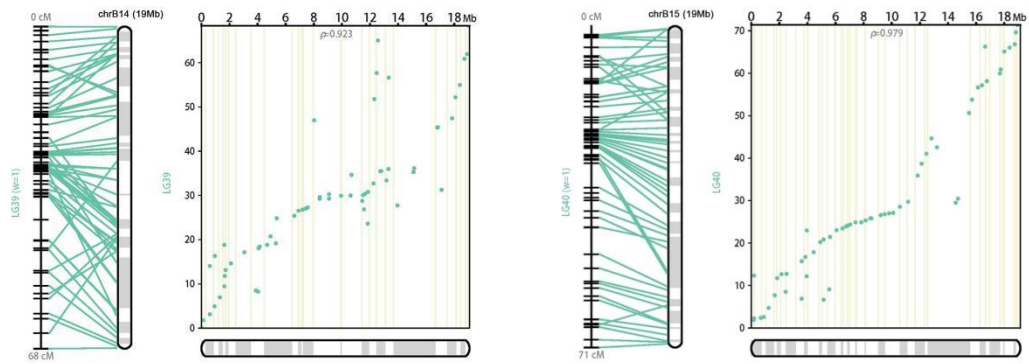

**Fig. S3.** Pseudo-chromosome level assembly collinearity to genetic maps with ALLMAPS. Pseudo-chromosomes were constructed by Hi-C data using ALLHiC (80, 81). A genetic map from crucian carp (82) was used to evaluate the accuracy of chromosome level assembly using ALLMAPS (83) with equal weights. Green lines connect the goldfish genome scaffolds to the linkage group of crucian carp.

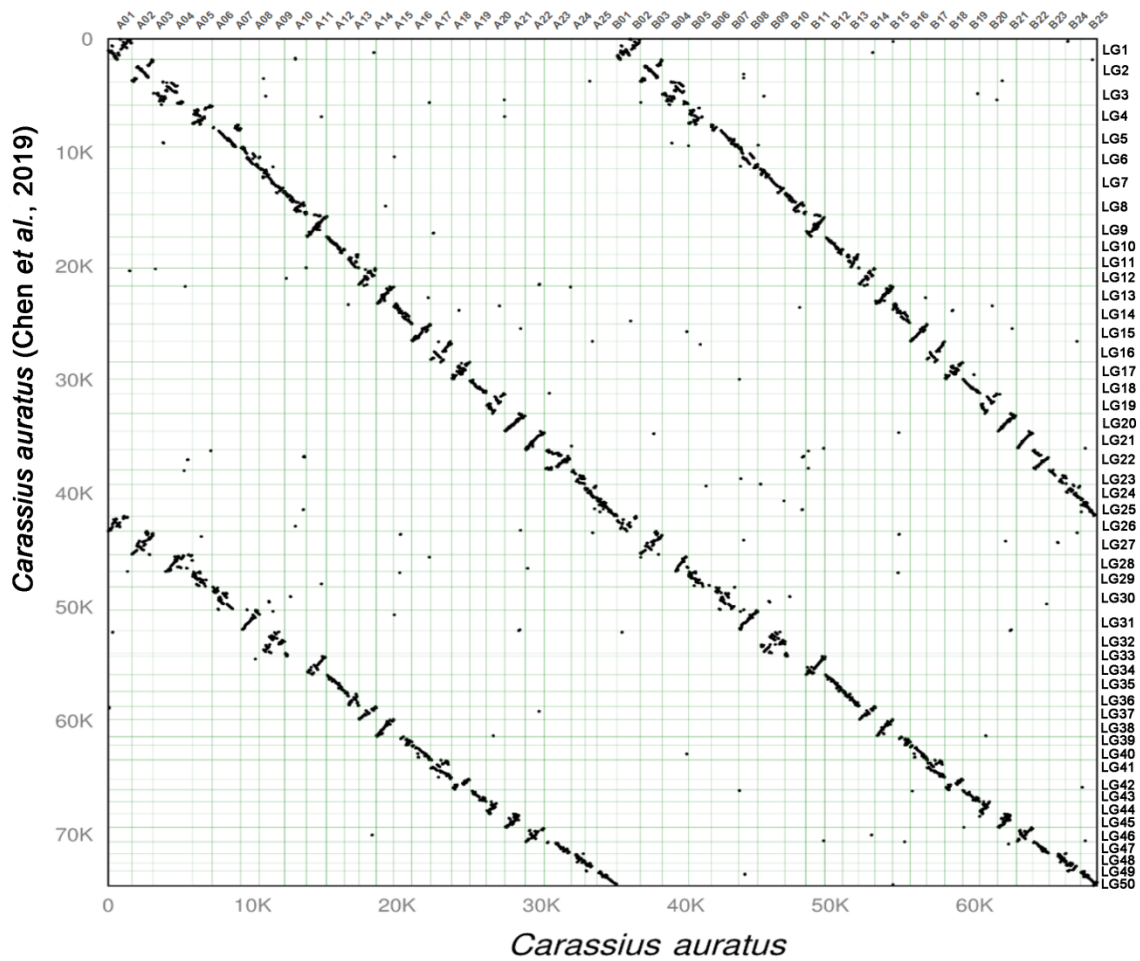

**Fig. S4.** Alignment of new and published *C. auratus* chromosome dot plots. Homologous gene pairs between the two goldfish species are represented by a dark dot. The genome sequence of *C. auratus* (x axis) was aligned and plotted against that of the published reference strain (y axis) by MUMmer. The diagonal line confirms the very high similarity of both genomes. The dots represent the positions of conserved DNA sequences in the genomes. The middle, main diagonal line indicates the collinearity between the homologous chromosome pairs of each ChrA01-A25 and ChrB01-B25 between the two goldfish assemblies (i.e. A-A' and B-B'), whereas the bottom left and upper right diagonal lines show the collinearity of the homeologous chromosome pairs between subgenome A in one assembly and subgenome B in the other one, revealing the signals from the WGD ohnologs (i.e. A-B' and B-A').

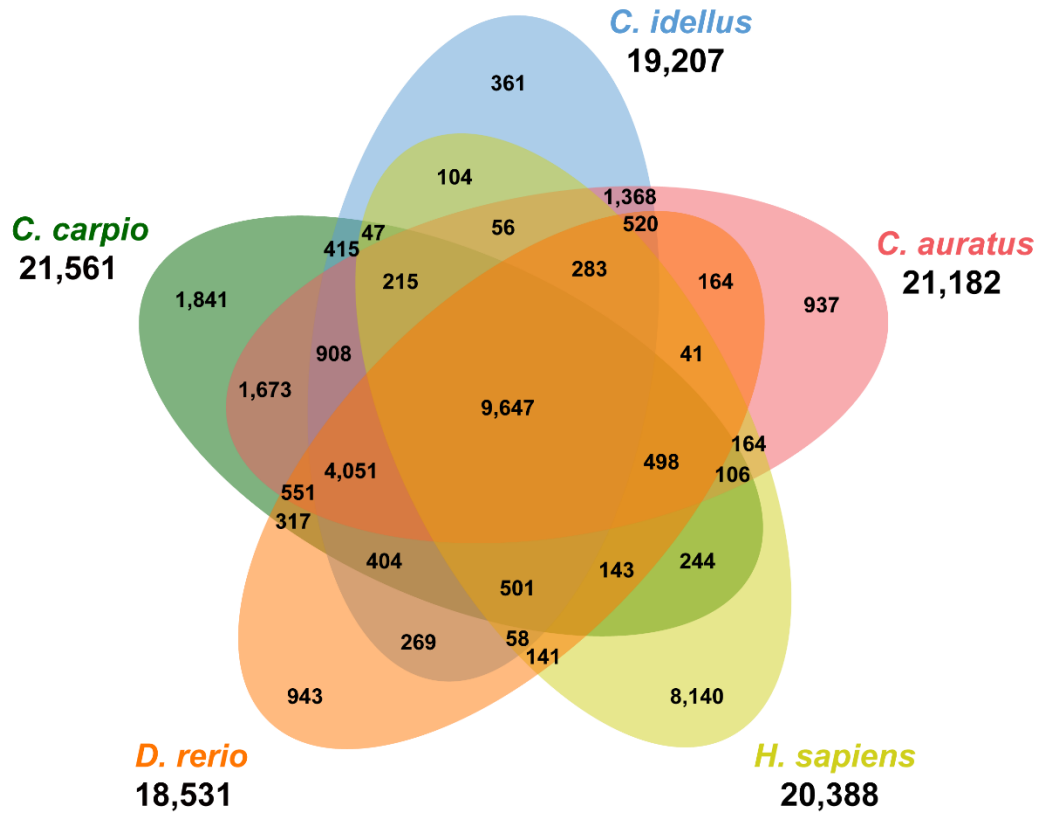

**Fig. S5.** Venn diagram of *Carassius auratus*, *Cyprinus carpio*, *Ctenopharyngodon idellus*, *Danio rerio*, and human. The orthologous gene clusters were shown in the diagram.

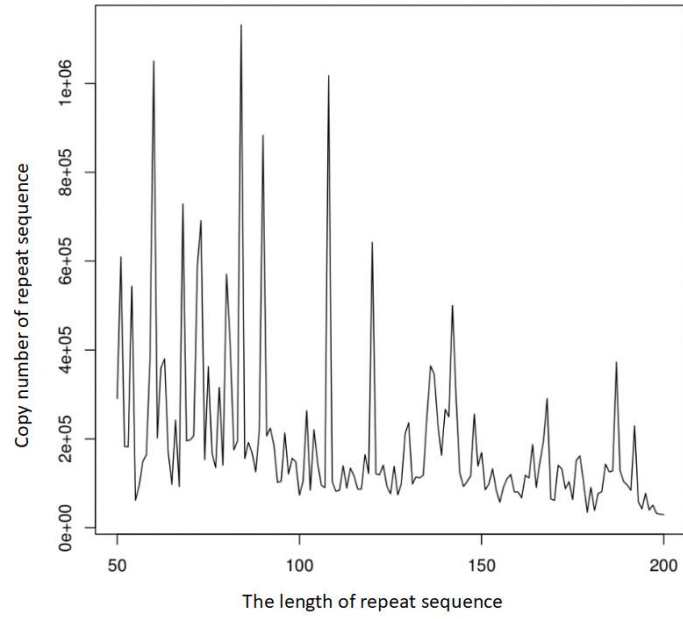

**Fig. S6.** Prediction of centromere model. The centromere type of goldfish was monocentric. A base monomer length was 84 bp.

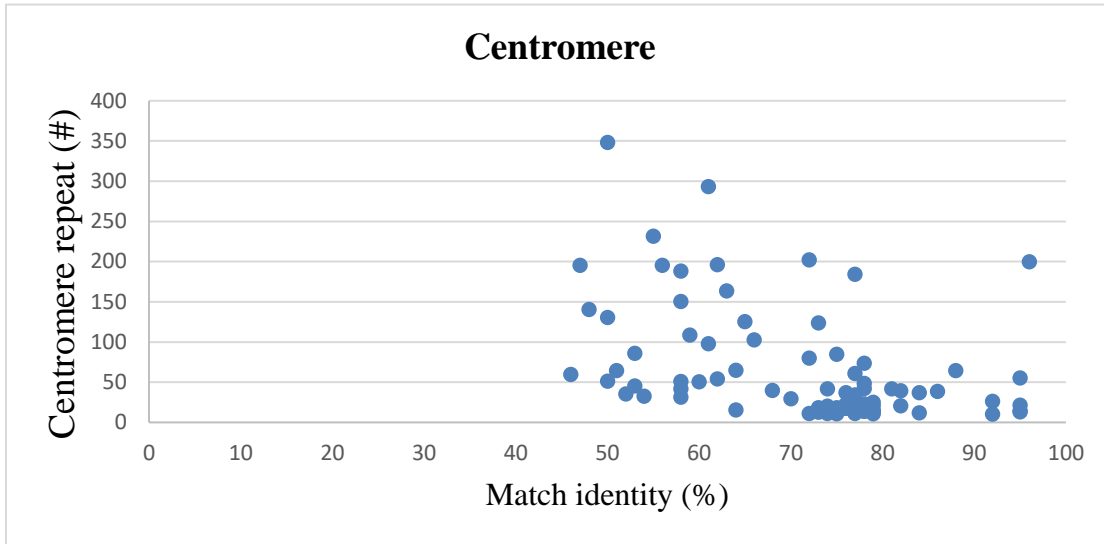

**Fig. S7.** Correlation between copy number of repeat and the match identity. The match identity between monomers decreases as the copy number of a repeat increases. The scatter diagram was drawn by a data matrix of centromeres predicted in genome BMerged2A. As shown, the low single-copy numbers of the centromere ( $\leq 100$ ) have a high matching rate ( $\geq 70\%$ ), in contrast with the high copy numbers. This result provides insights into the centromere characteristics of the goldfish genome, revealing an inverse relationship between copy number and match identity between the centromeric repeats.



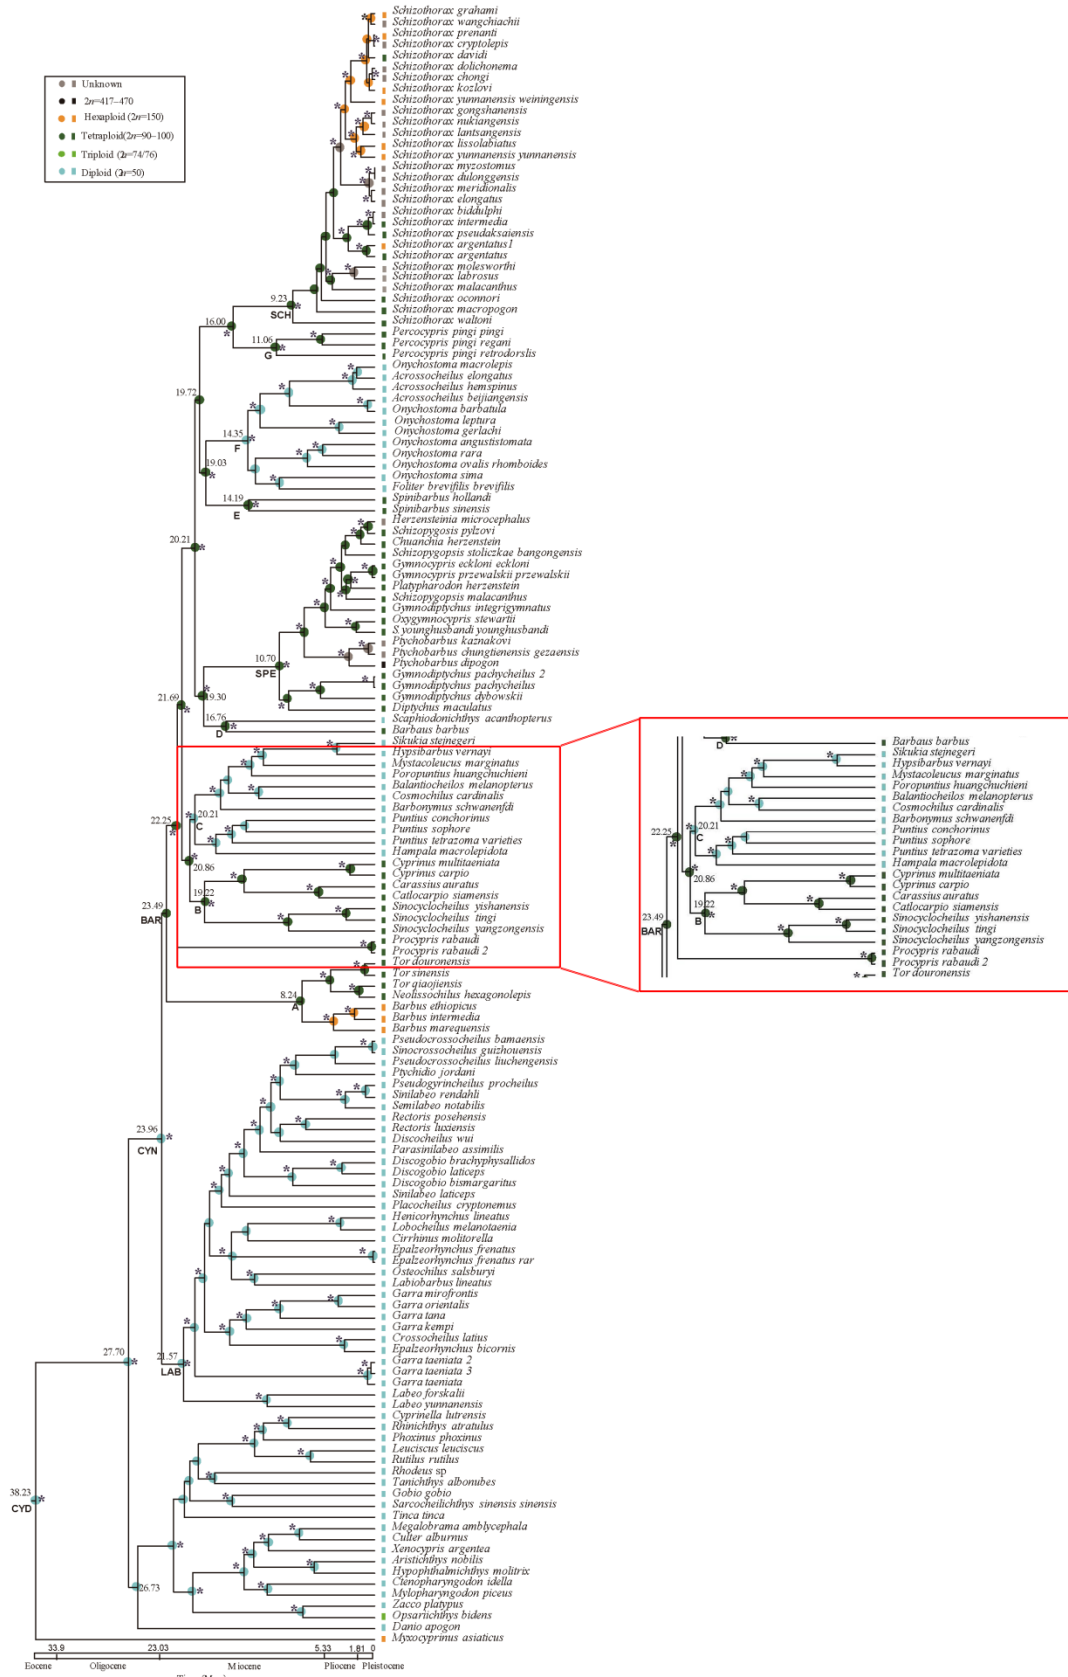

**Fig. S8.** Cyprininae phylogeny [modified from (85)]. The six representative diploid Barbinae species ( $2n = 50$ ), including *Puntius semifasciolatus*, *Hypsibarbus vernayi*, *Mystacoleucus marginatus*, *Balantiochelos melanopterus*, *Barbonymus schwanenfdi*, and *Hampala macrolepidota* are underlined.

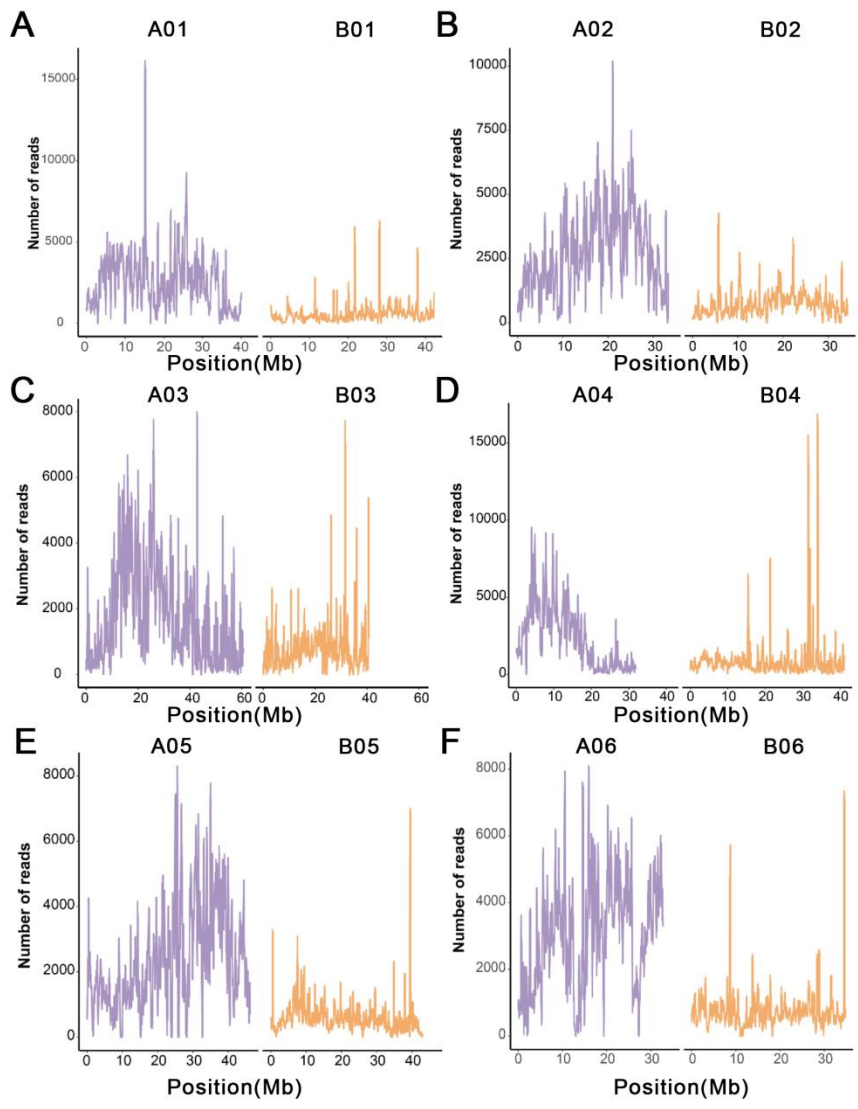

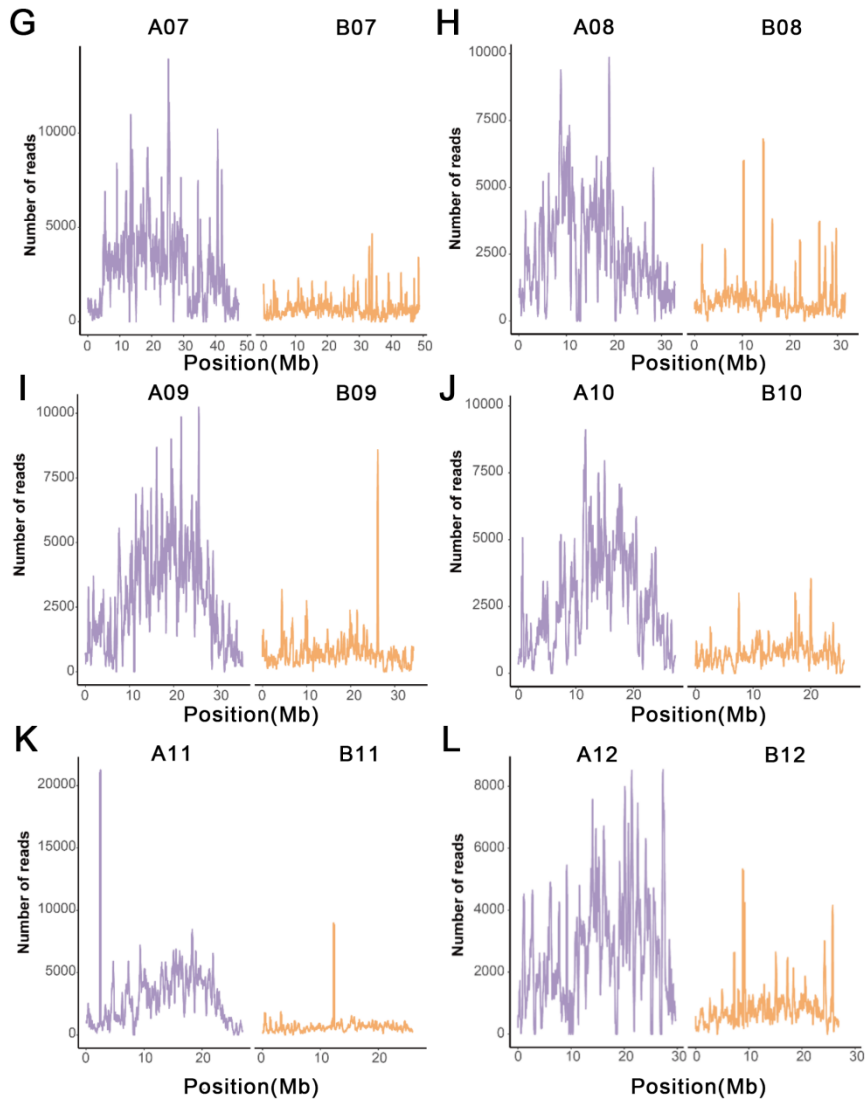

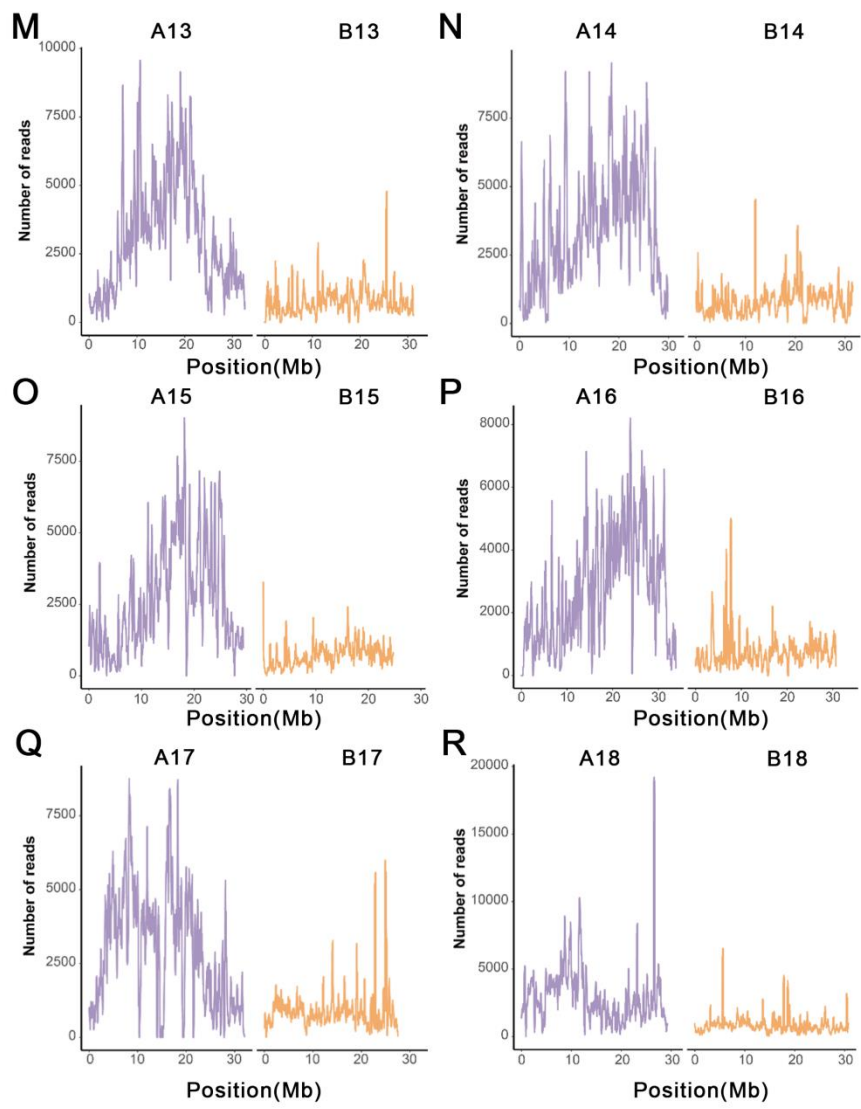

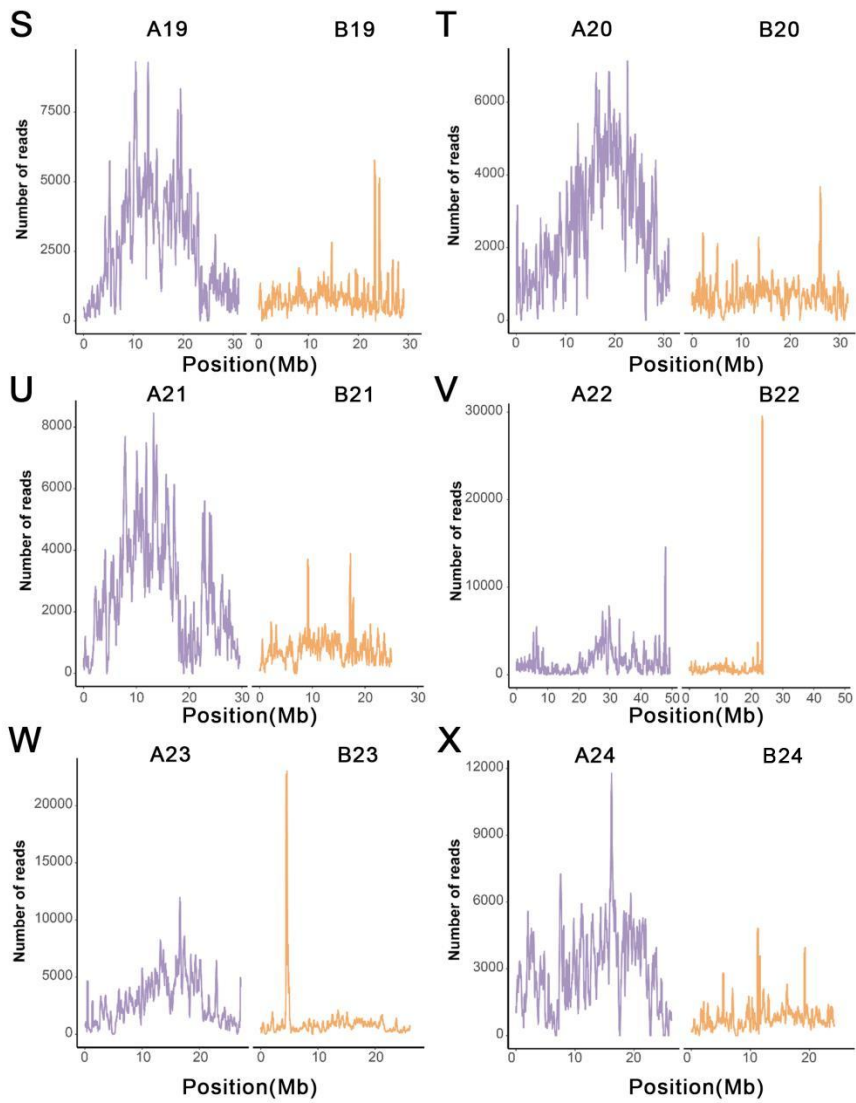

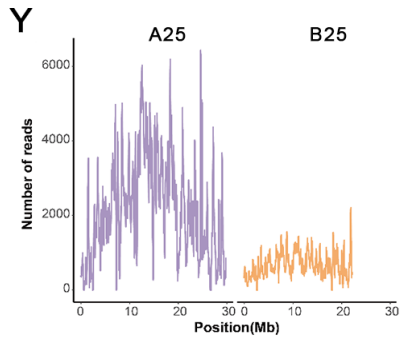

**Fig. S9.** Distribution of *Puntius semifasciolatus* reads mapped against the 25 goldfish homeologous chromosome pairs. The A (ChrA01~A25) and B (ChrB01-B25) subgenomes are marked with purple and orange lines, respectively.

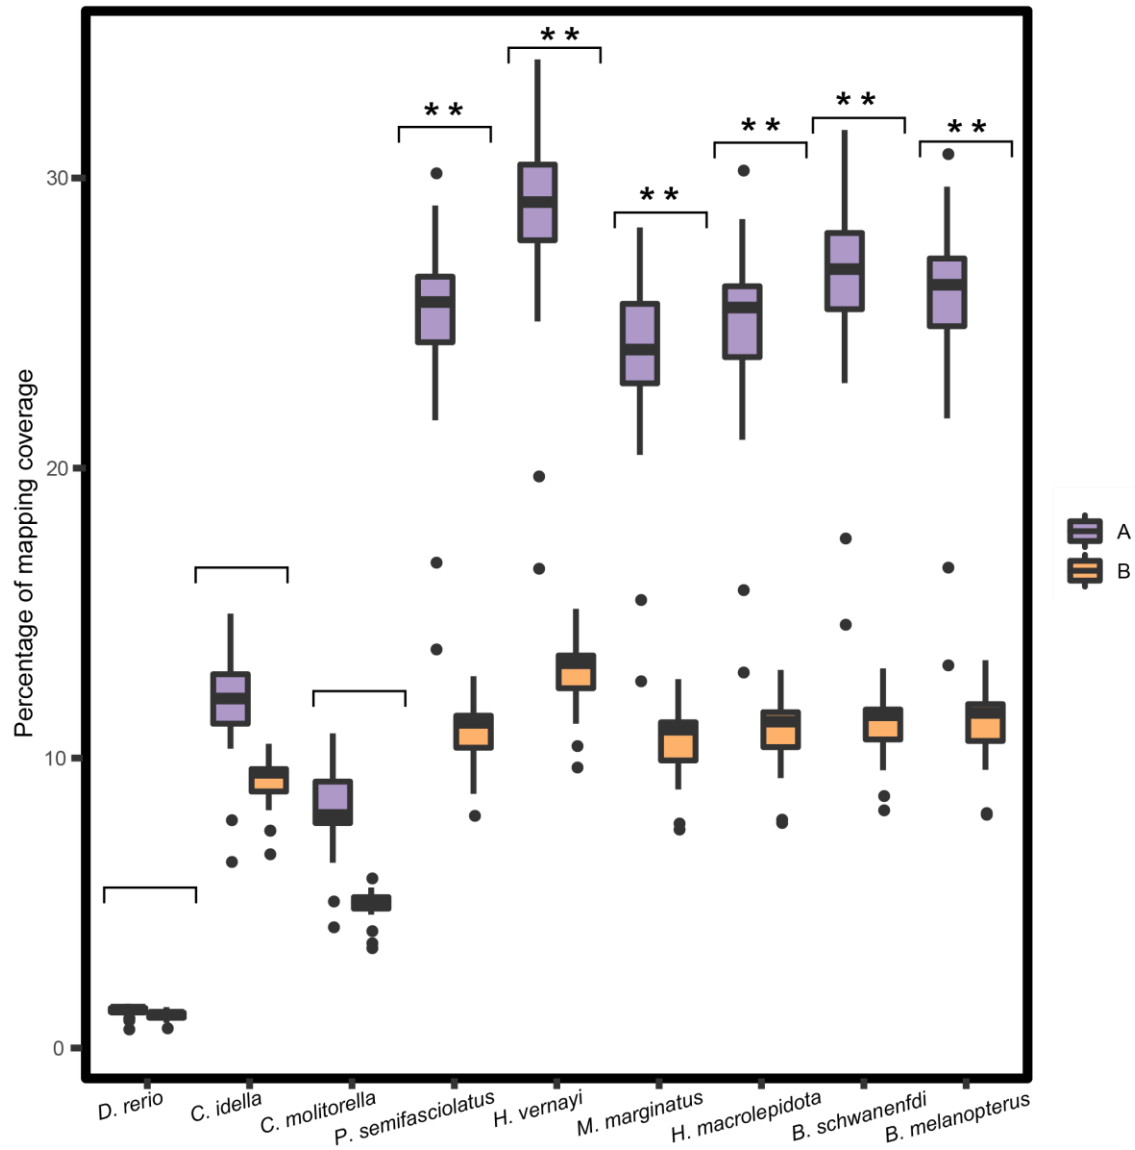

**Fig. S10.** Mapping coverage of *D. rerio*, *C. idella* and representative *Barbinae* species against the 25 goldfish homeologous chromosome pairs. Boxplots from left to right represent *D. rerio*, *C. idella*, *C. molitorella*, *P. semifasciolatus*, *H. vernayi*, *M. arginatus*, *H. macrolepidota*, *B. schwanenfdi*, and *B. melanopterus*. The X-axis and Y-axis indicate chromosome position (Mb) and number of reads mapped on the goldfish chromosomes, respectively. The A (ChrA01~A25) and B (ChrB01-B25) subgenomes are marked with purple and orange boxes, respectively.



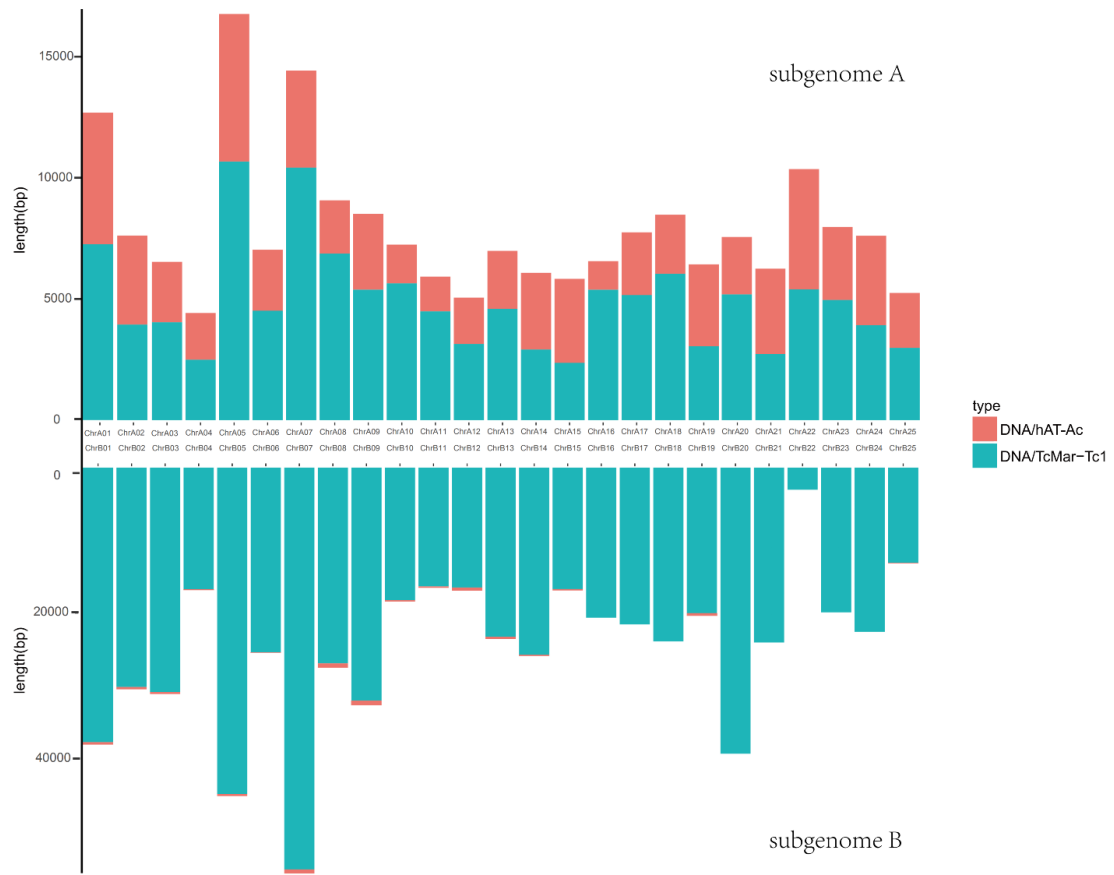

**Fig.11** Distribution of the subgenome-specific transposons on each goldfish chromosome.

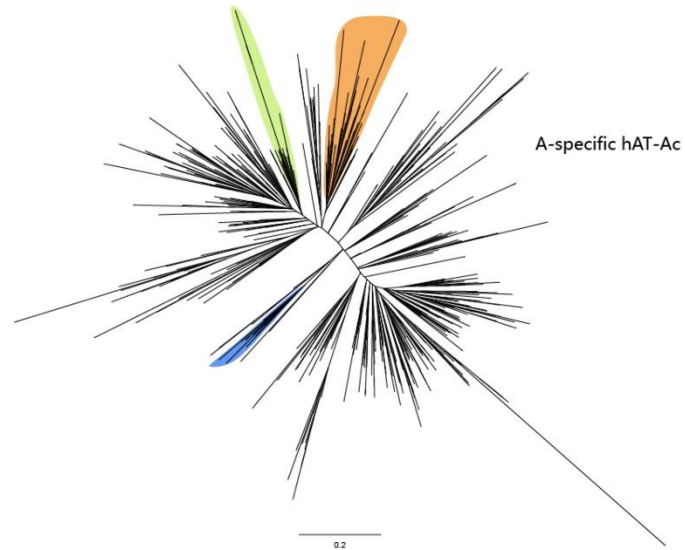

**Fig.12** Phylogenetic tree of the hAT-Ac element expansion in the goldfish genome, built by means of Jukes-Cantor corrected distances. Subclusters with enough members to determine accurate timings are highlighted.

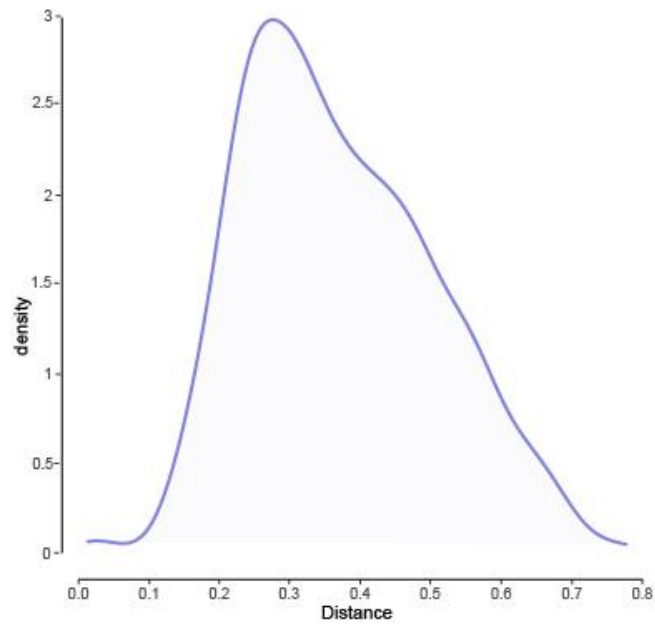

**Fig.13** Jukes-Cantor distance of the selected subfamily sequences of transposons against their conservative sequences.

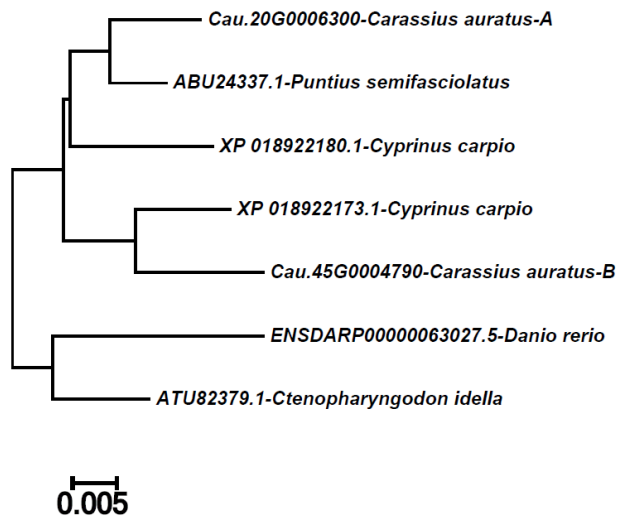

Fig. S14 Phylogenetic tree of connective tissue growth factor-like from *Puntius semifasciolatus*, goldfish fish, common carp, glass carp and zebrafish.

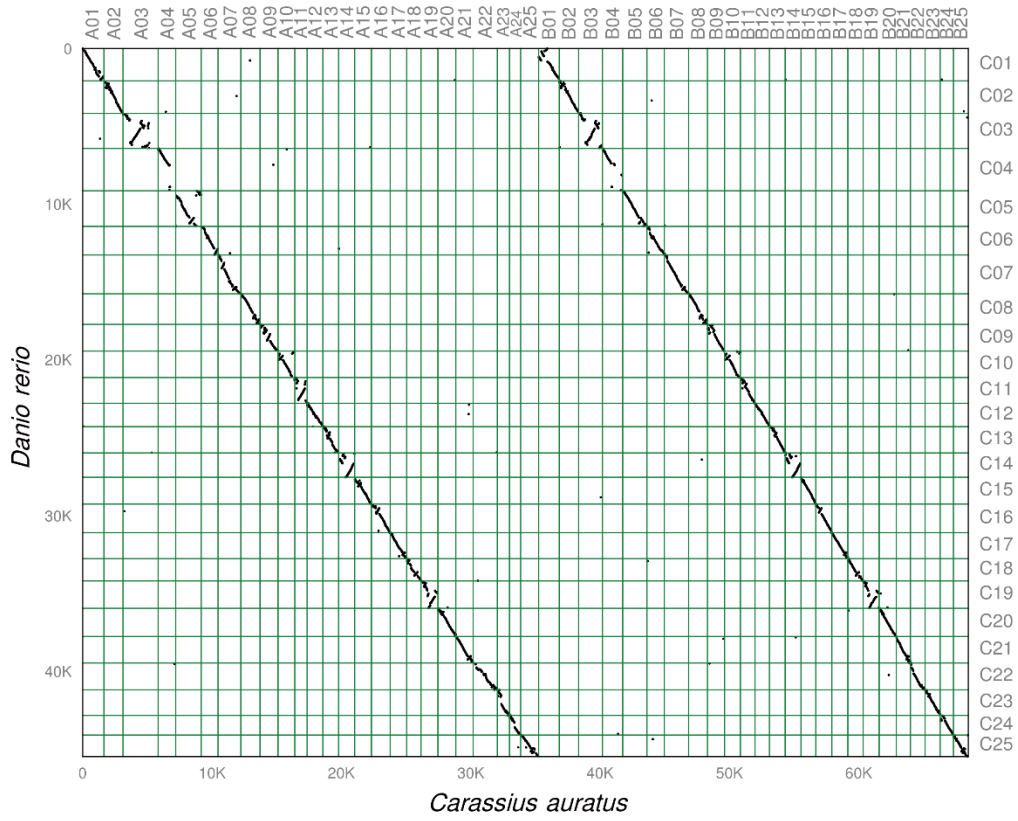

**Fig. S15.** Dot-plot of alignment of the genomes of *C. auratus* and *D. rerio*.

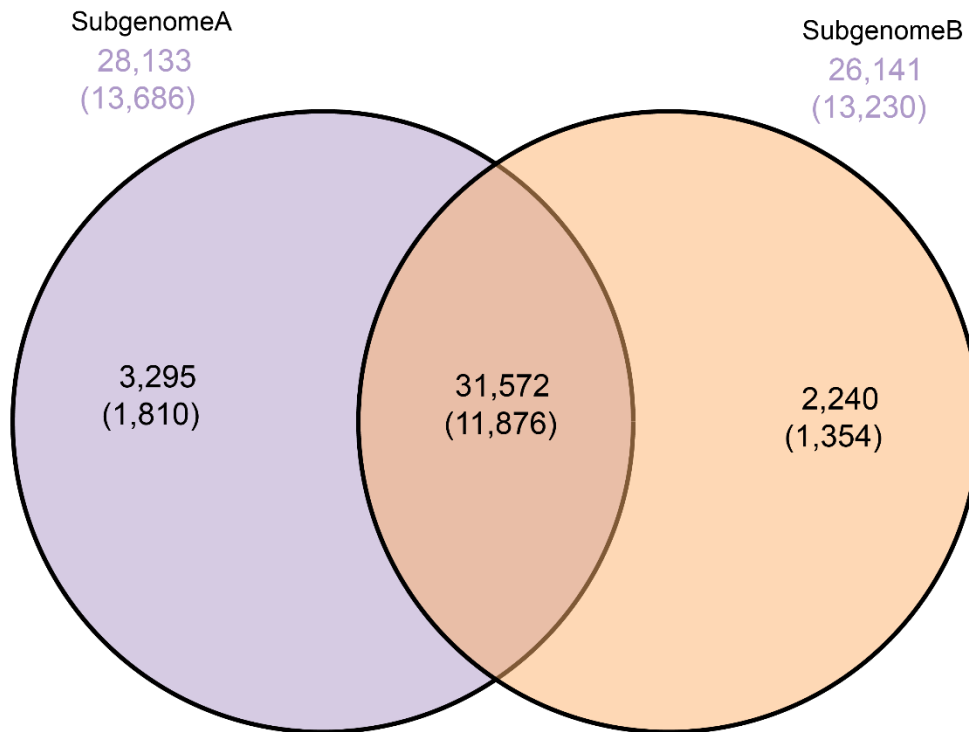

**Fig. S16.** Venn diagram statistics for genes and gene clusters of subgenomes A and B in *C. auratus*. Subgenomes A and B contain 28,133 genes (13,686 gene clusters) and 26,141 genes (13,230 clusters), respectively. A total of 31,572 genes (11,876 gene clusters) were shared between subgenomes A and B, of which 3,295 genes (1,810 gene clusters) were specific to subgenome A and 2,240 genes (1,354 gene clusters) to subgenome B.

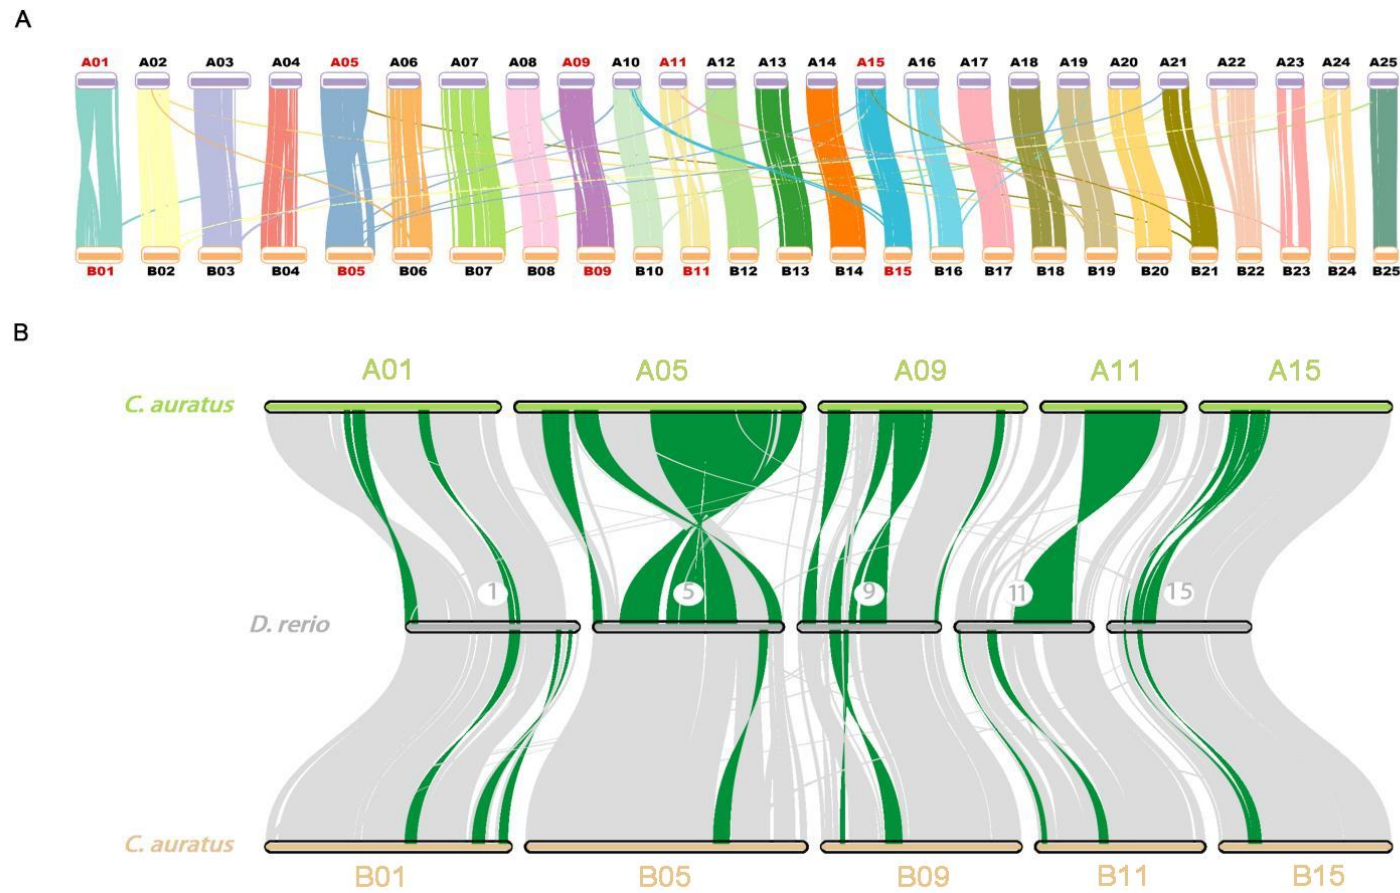

**Fig. S17.** Synteny analysis of the genomes. (A) Synteny analysis of subgenomes A and B in *C. auratus*. Schematic representation of synteny between subgenomes A and B. Each line connects a pair of orthologous genes between subgenomes A and B. (B) Genomic alignments between ChrA01, ChrA05, ChrA09, ChrA11, ChrA15, ChrB01, ChrB05, ChrB09, ChrB11, and ChrB15 in *Carassius auratus* and corresponding chromosomes in *Ctenopharyngodon idellus* and *Danio rerio*. The inverted regions are shown with green lines.

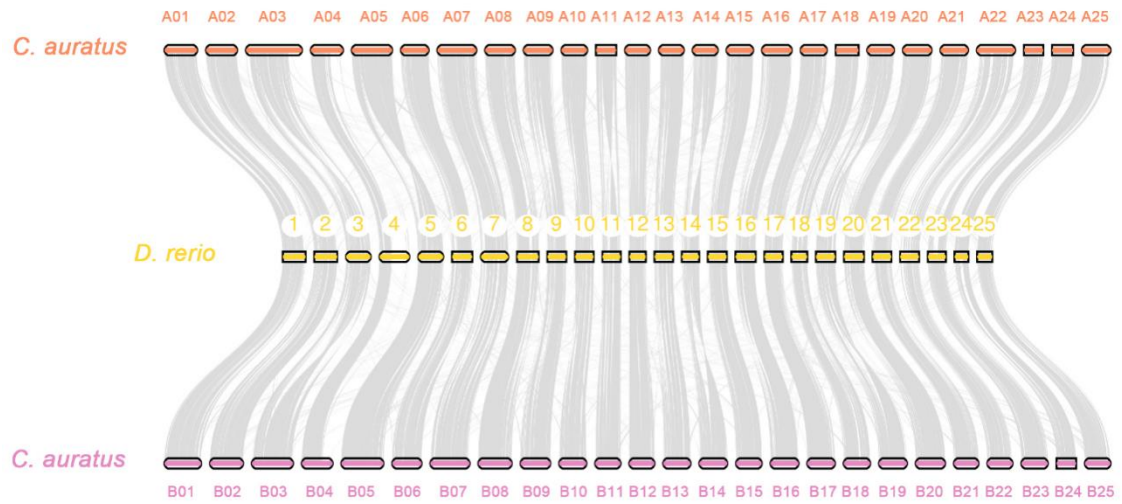

**Fig. S18.** Schematic representation of the synteny analysis between *Carassius auratus* and *Danio rerio*. Each line connects a pair of orthologous genes.



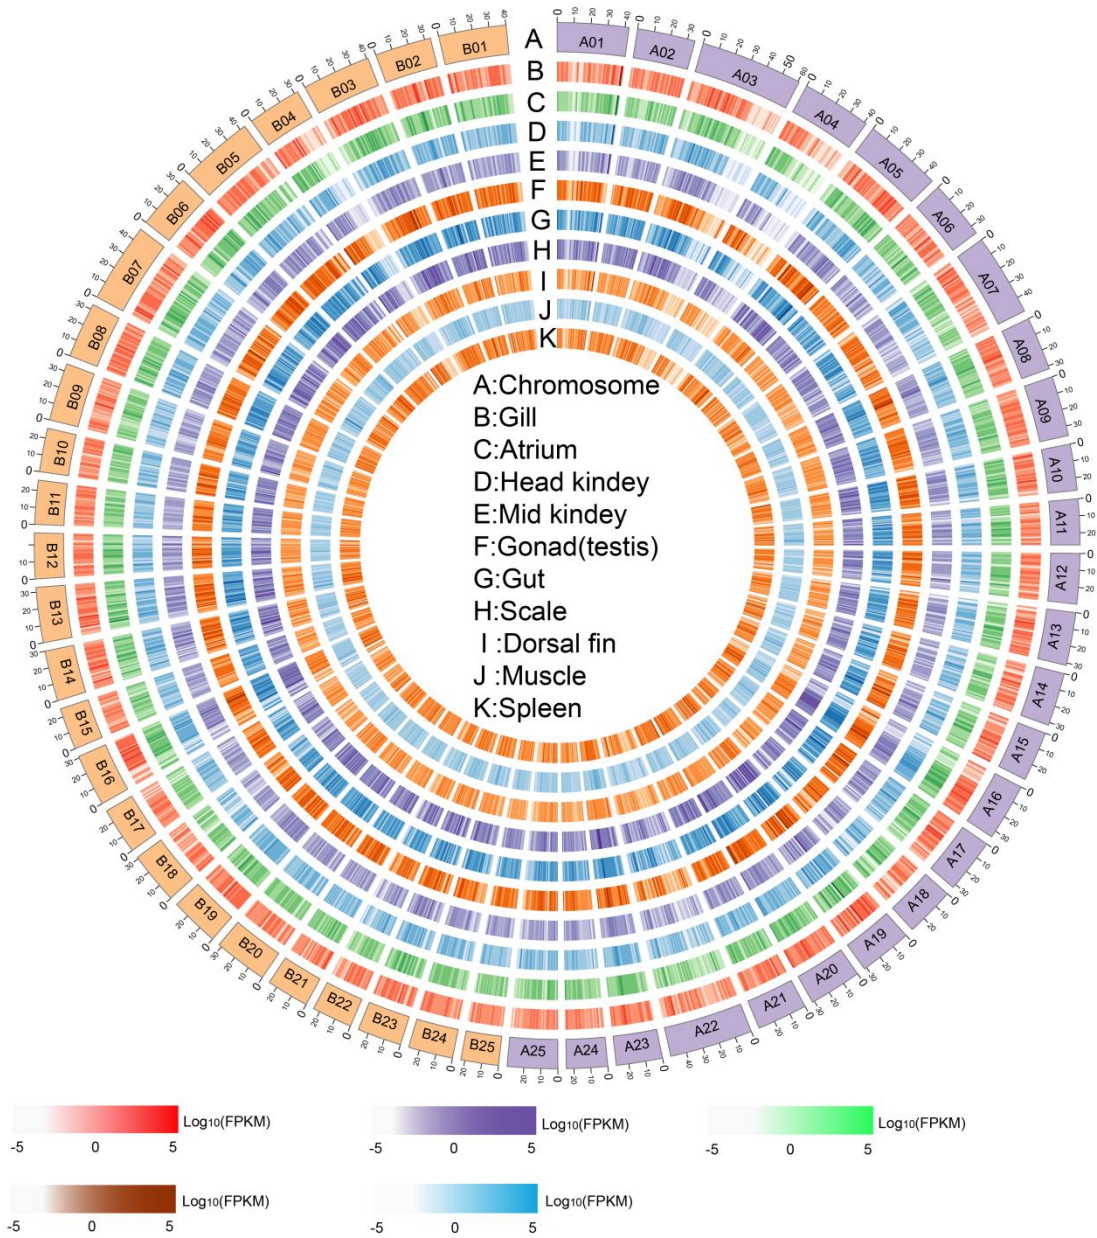

**Fig. S19.** Genomic expression pattern for ten tissues of *Carassius auratus*. Circos plot showing the expression abundance across the 50 chromosomes for ten tissues. From outer ring to the center, A, chromosome; B, gill; C, atrium; D, head kindey; E, mid kindey; F, gonad (testis); G, gut; H, scale; I, dorsal fin; J, muscle; and K, spleen.

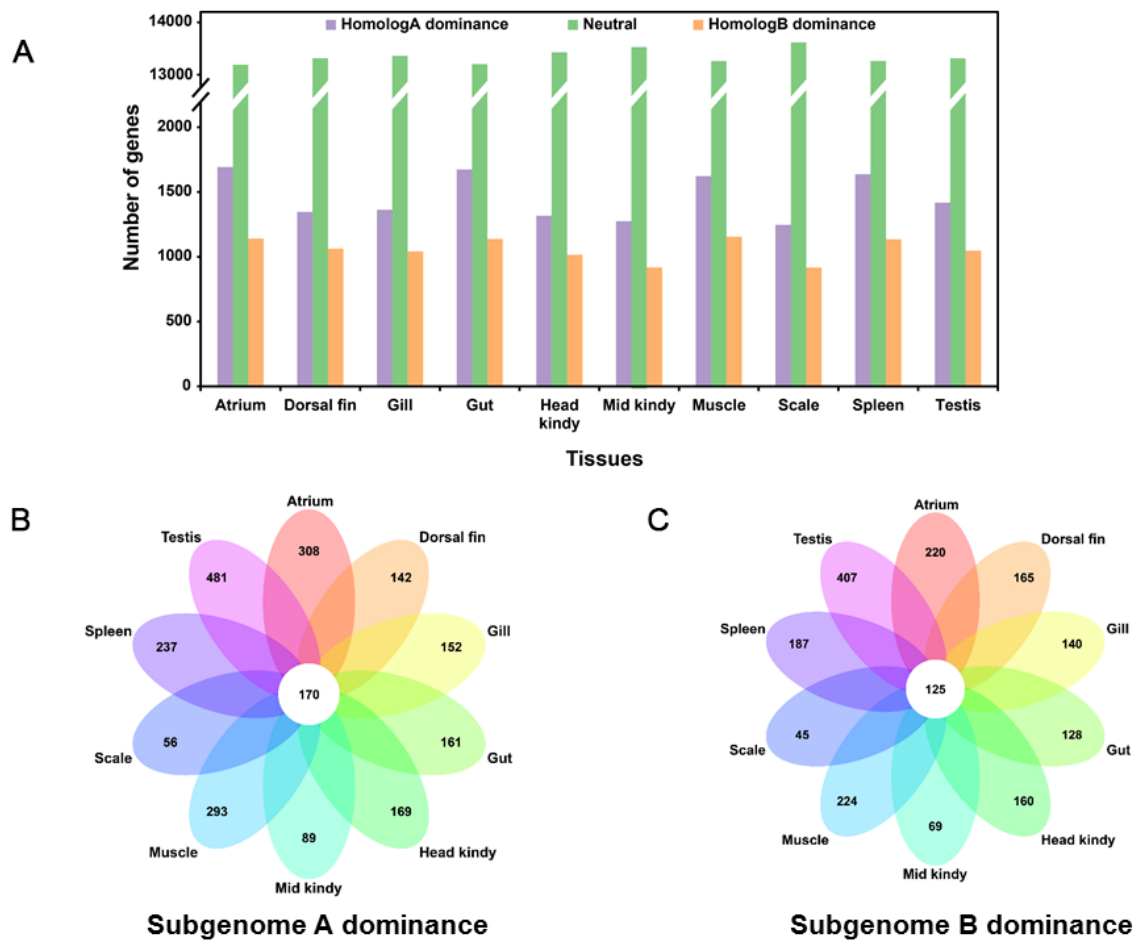

**Fig. S20.** Asymmetrical homoeologous gene expression in *C. auratus*. (A) Number of genes preferentially expressed [ $> \log_2(FC)$ ] with homolog A, homology B, or neutral dominance in ten tissues (atrium, dorsal fin, gill, gut, head kidney, mid kidney, muscle, scale, spleen, and testis) in *C. auratus*. (b and c) Venn diagrams indicating genes specifically preferentially expressed in each of the tissues with homolog A (B) and homolog B (C) dominance. The central white circles represent the preferentially expressed genes shared in the ten tissues with subgenomes A or B dominance.

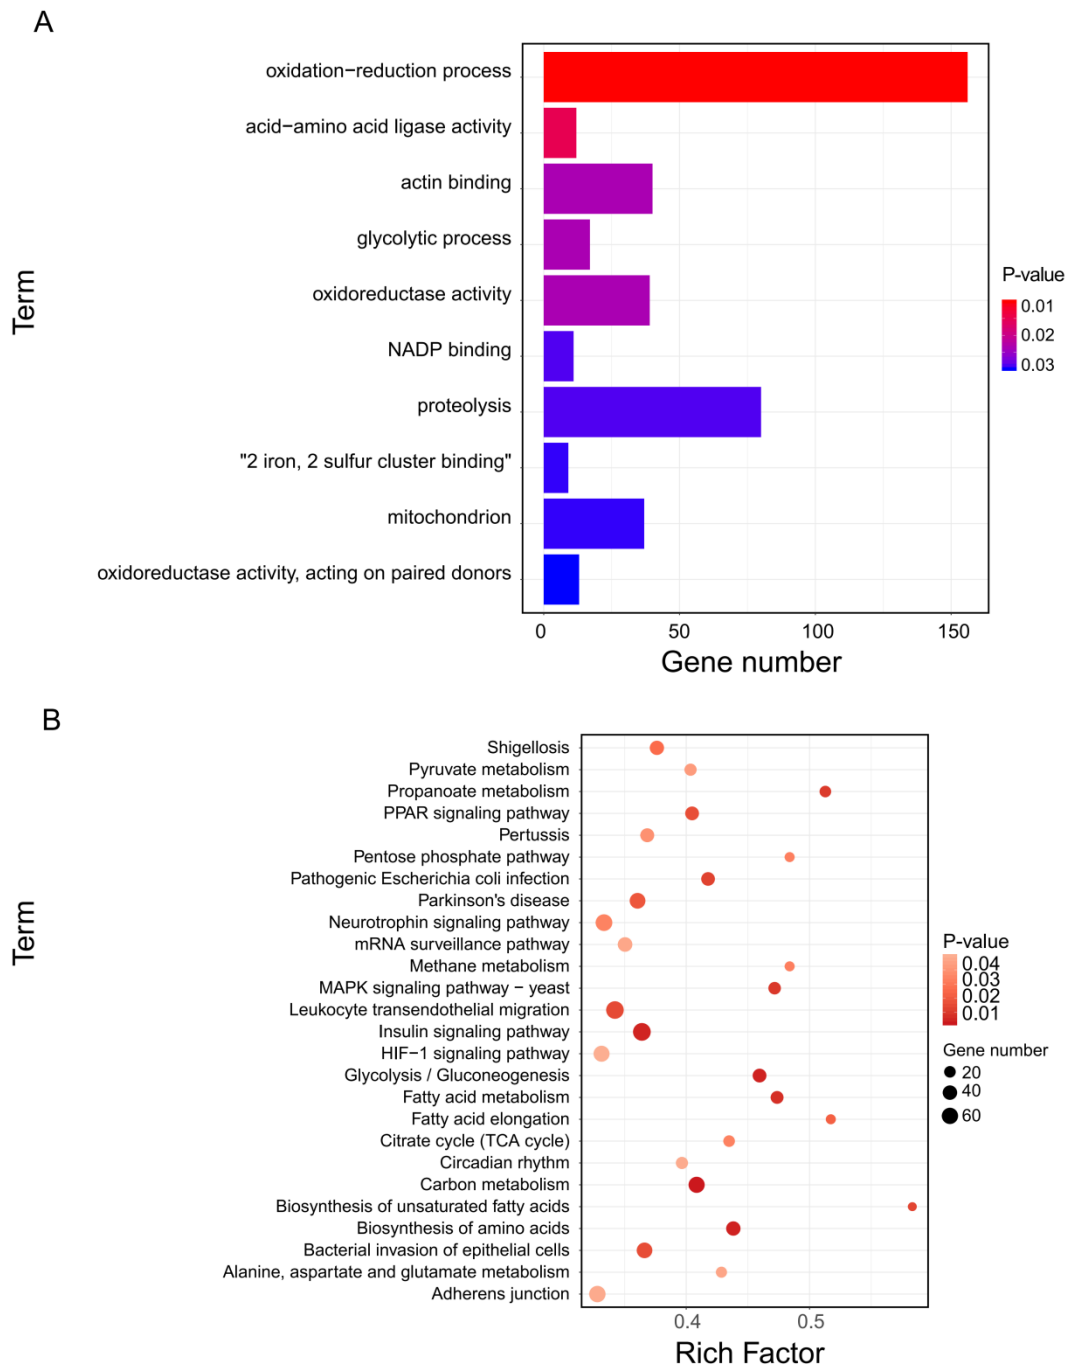

**Fig. S21.** GO term and KEGG pathway enrichment for 4,123 dominant expressed genes of subgenome A in *C. auratus*. (A) GO term enrichment showing that the dominantly expressed homoeologs of subgenome A were primarily enriched in the oxidation-reduction process, acid-amino ligase activity, actin binding, glycolytic process, and oxidoreductase activity, etc. (B) KEGG pathway analysis indicating that the predominantly expressed homoeologs of subgenome A mainly participate in the insulin signaling pathway, leukocyte transendothelial migration, neurotrophin signaling pathway, and HIF-1 signaling pathway. The size and color of the circles are used to distinguish significance.



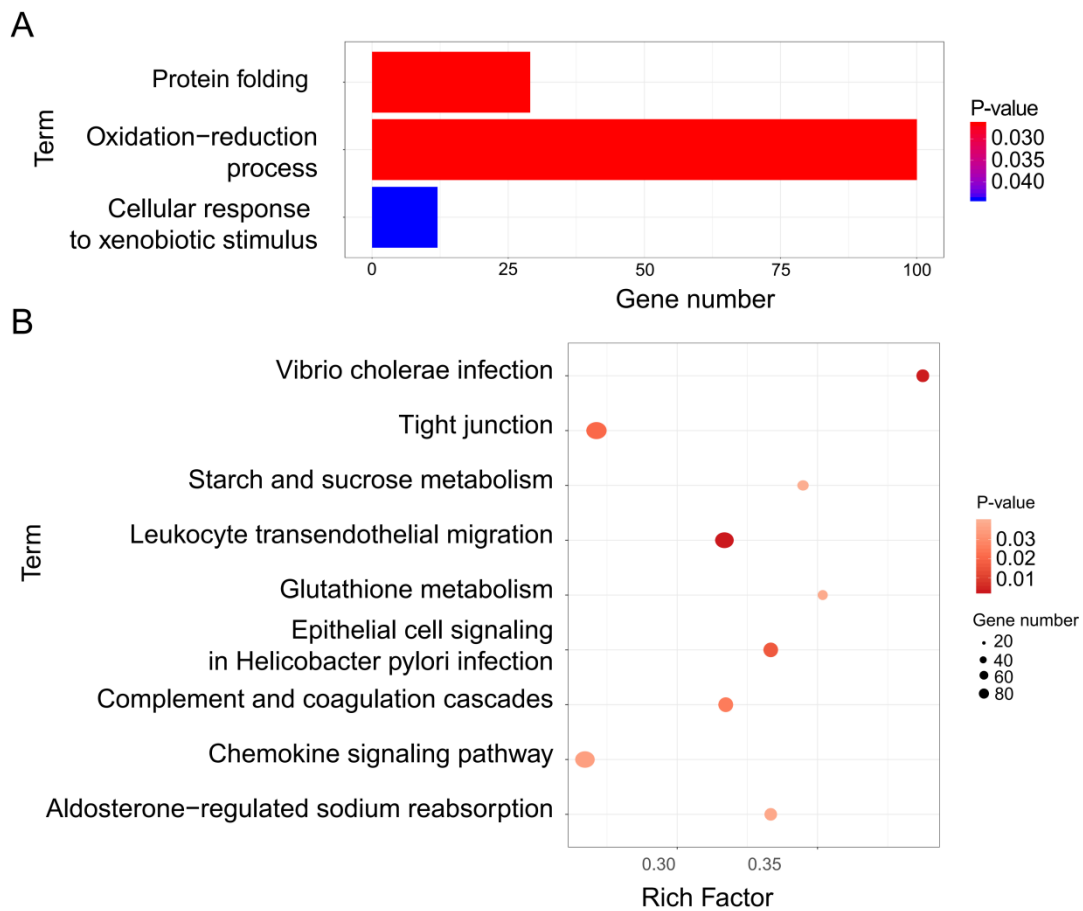

**Fig. S22.** GO term and KEGG pathway enrichment for the 2,941 dominantly expressed genes of subgenome B in *C. auratus*. (a) GO term enrichment showing that the dominantly expressed homoeologs of subgenome B were primarily enriched in protein folding, oxidation-reduction process, and stimulus response. (b) KEGG pathway analysis indicating that the predominantly expressed homoeologs of subgenome B mainly participate in processes, such as tight junctions, chemokine signaling pathways, and coagulation cascades. The size and color of the circles are used to distinguish significance.

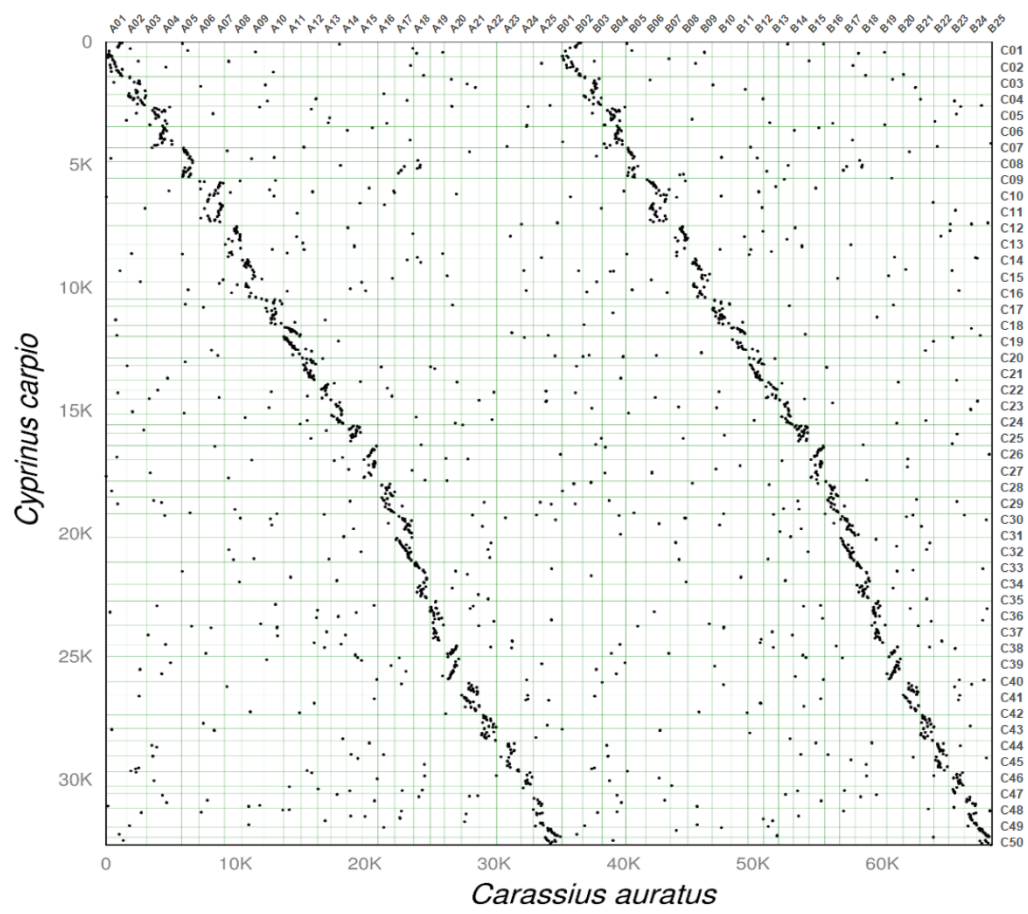

**Fig. S23.** Dot-plot of alignment of *Carassius auratus* genome with *Cyprinus carpio* genome.

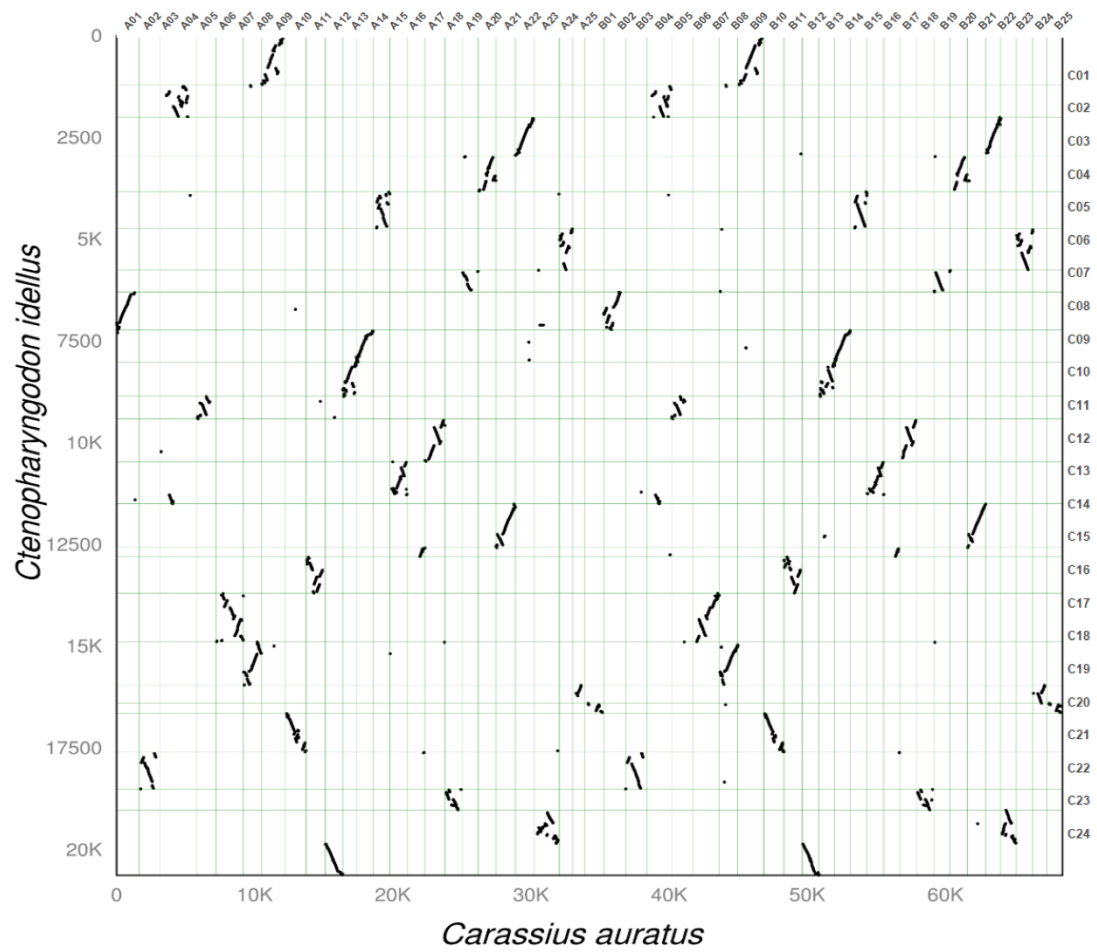

**Fig. S24.** Alignment of the genomes of *Carassius auratus* with that of *Ctenopharyngodon idellus*.

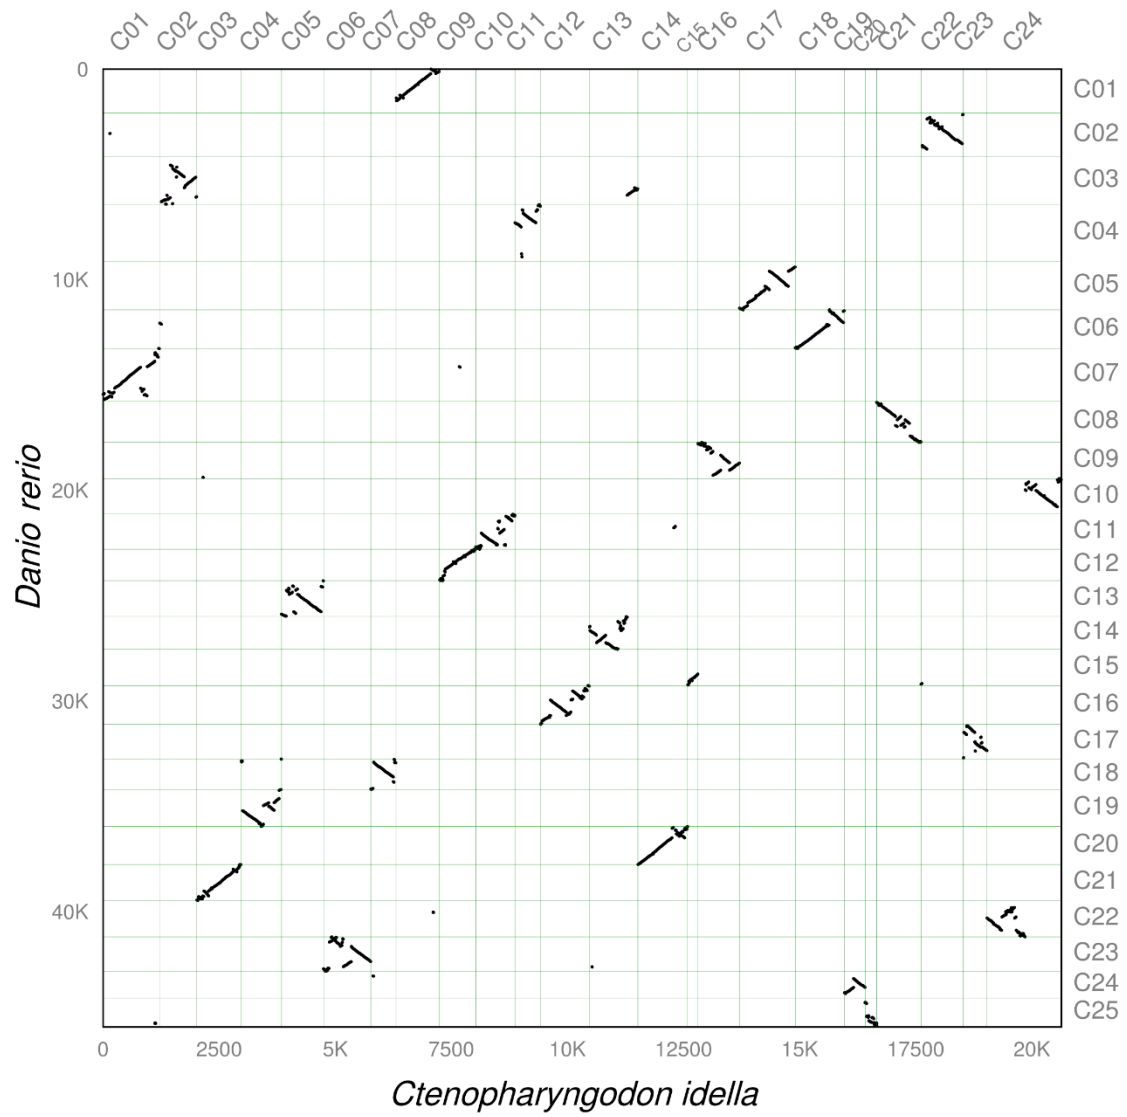

**Fig. S25.** Alignment of the genome of *Danio rerio* with that of *Ctenopharyngodon idellus*.



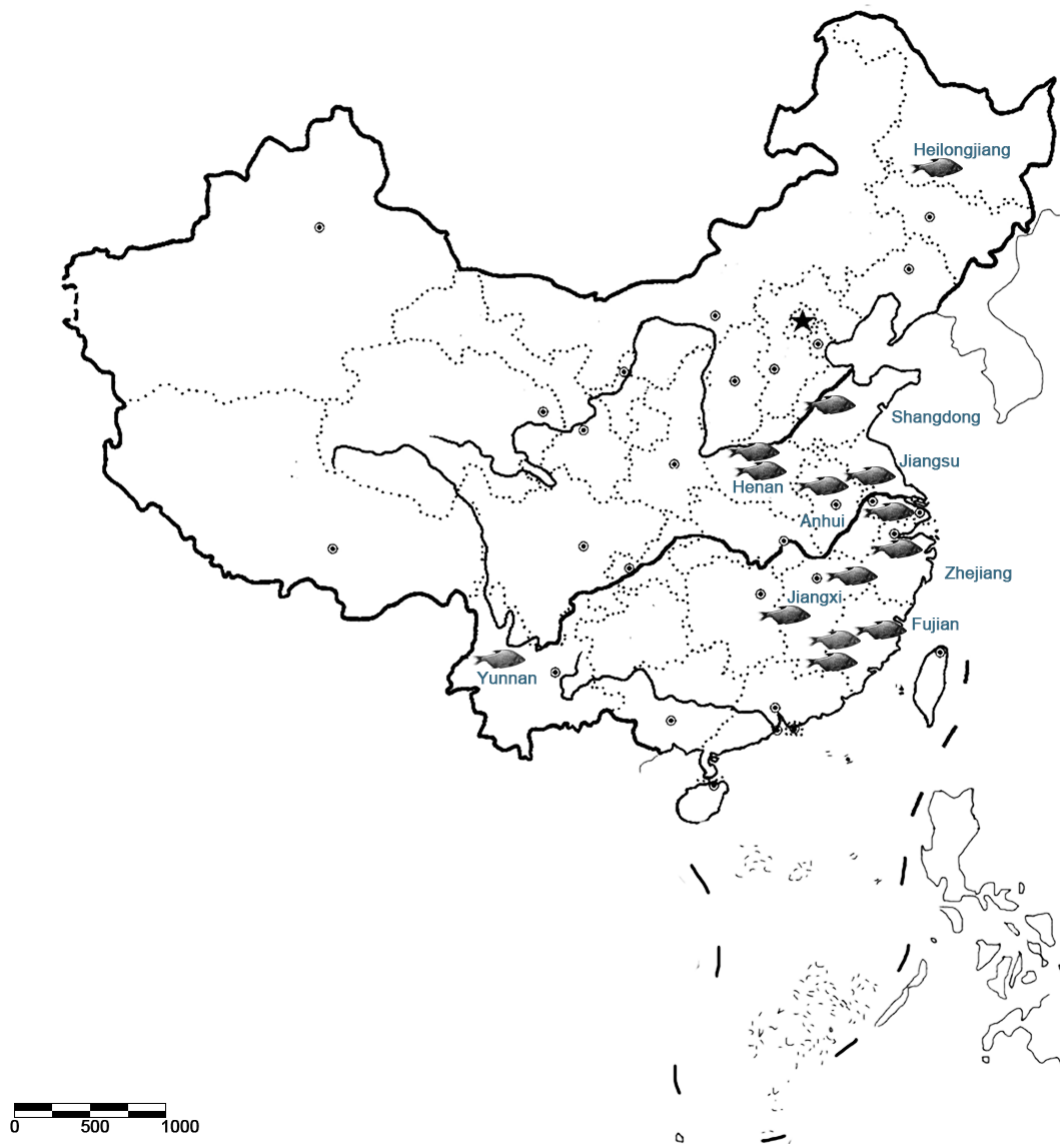

**Fig. S26.** Map of the resequenced samples collected in China. A total of 16 wild crucian carps were collected from the enclosed waters of the potential area of the goldfish origin, including the Chinese provinces of Zhejiang (3), Jiangxi (2), Henan (2), Jiangsu (1), Shangdong (1), Heilongjiang (1), Fujian (4), Yunnan (1), and Anhui (1).

**A**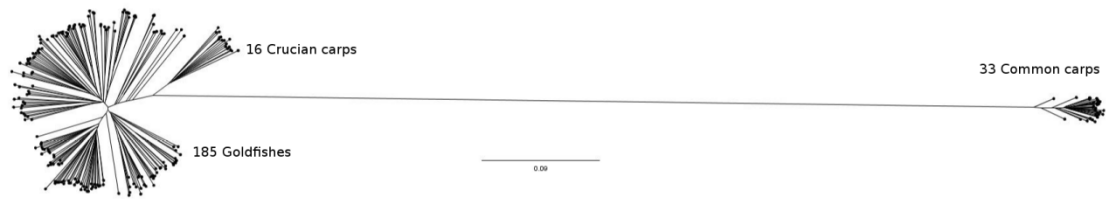**B**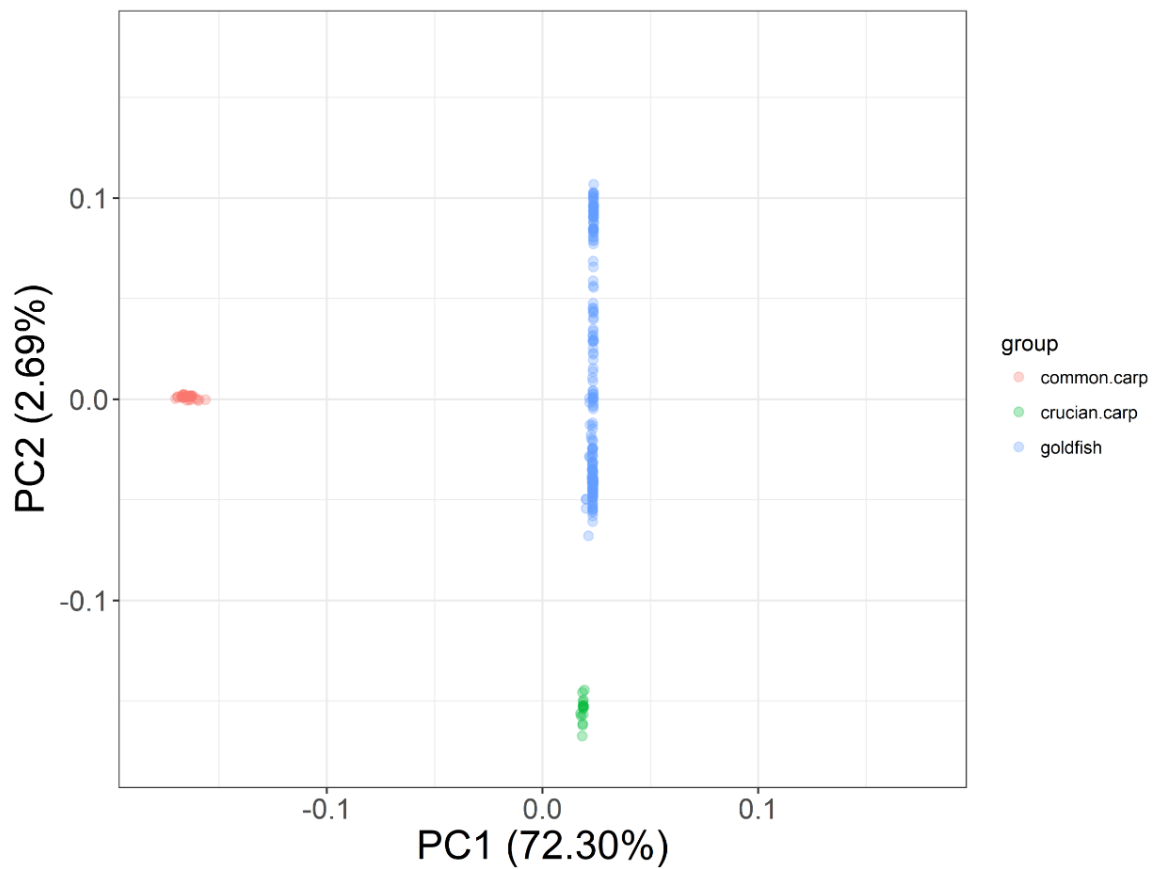

**Fig. S27.** 1-IBS genetic distance-based phylogeny tree constructed by fastME and visualized by FigsTree. (a) Identity-By-State (IBS) value calculated by plink --ibs for all pairs of 234 samples (33 *Cyprinus carpio*, 16 crucian carps, and 185 goldfishes). (b) PCA dotplot with the same three groups (33 *Cyprinus carpio*, 16 crucian carps, and 185 goldfishes).

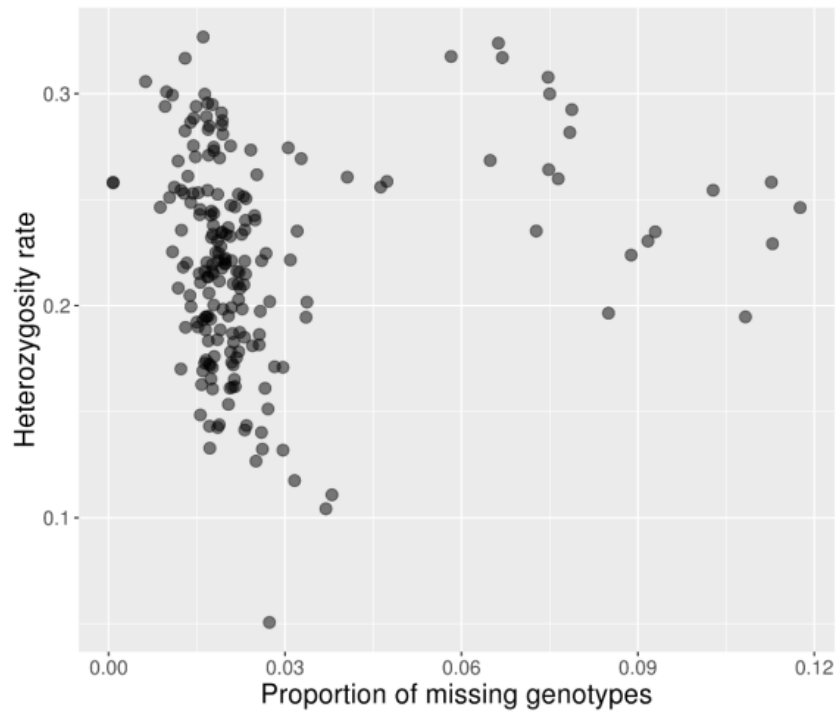

**Fig. S28.** Relationship between the heterozygosity rate and the proportion of missing genotypes in 201 goldfish populations.

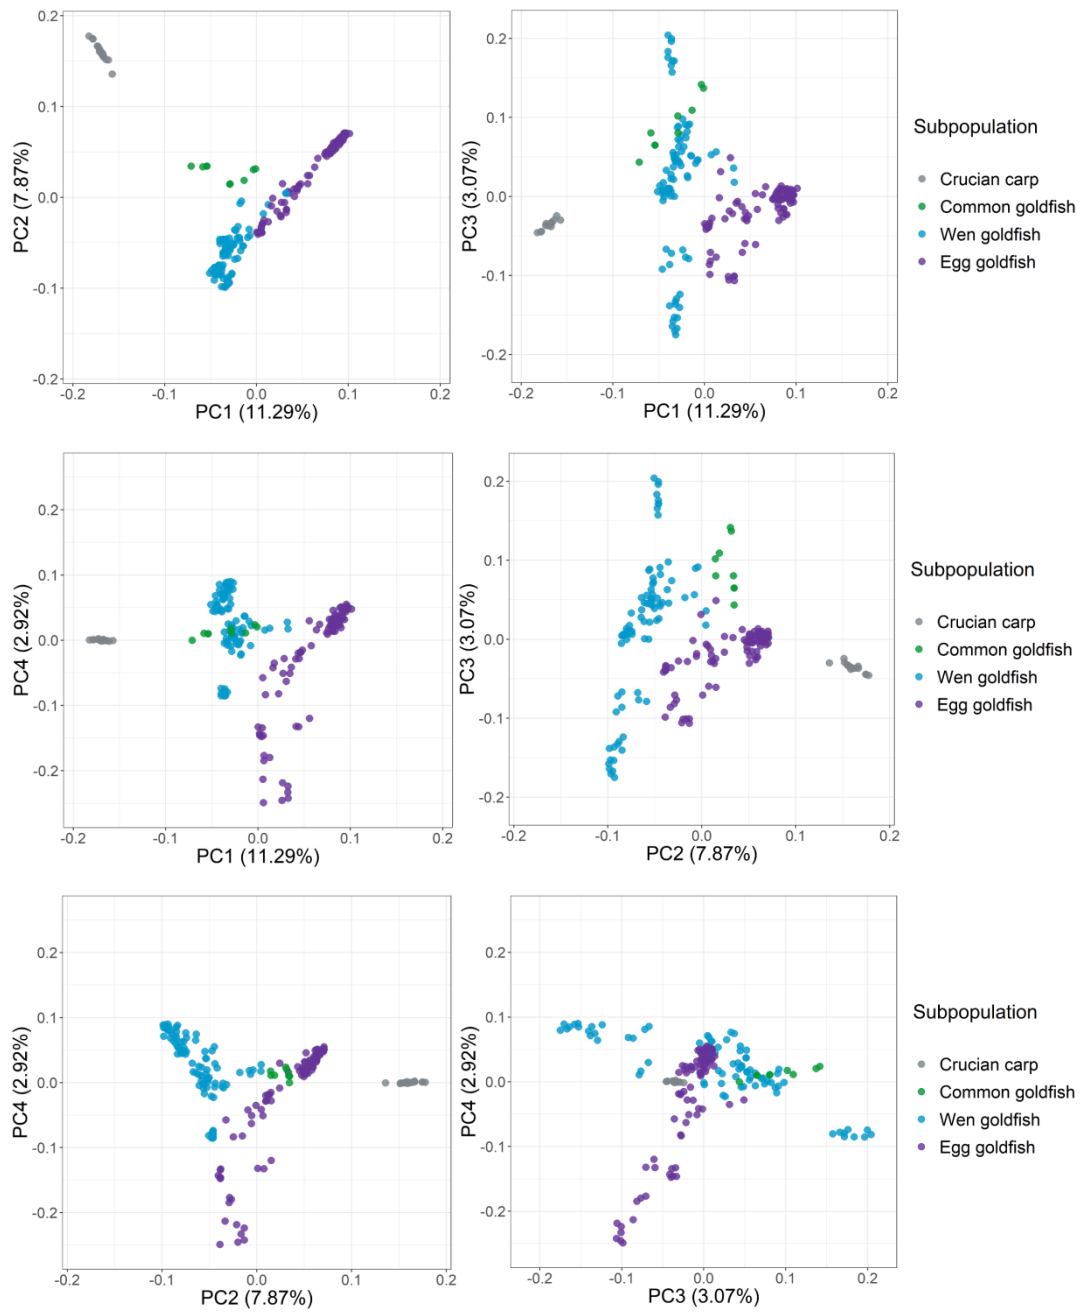

**Fig. S29.** Principal component SNP variation analysis for four subpopulations within 185 goldfish and 16 crucian carp samples. Samples from the subpopulations of crucian carp (CC), common goldfish (CG), Wen goldfish (WG), and Egg goldfish (EG) are shown. The plots show the first two principal components.

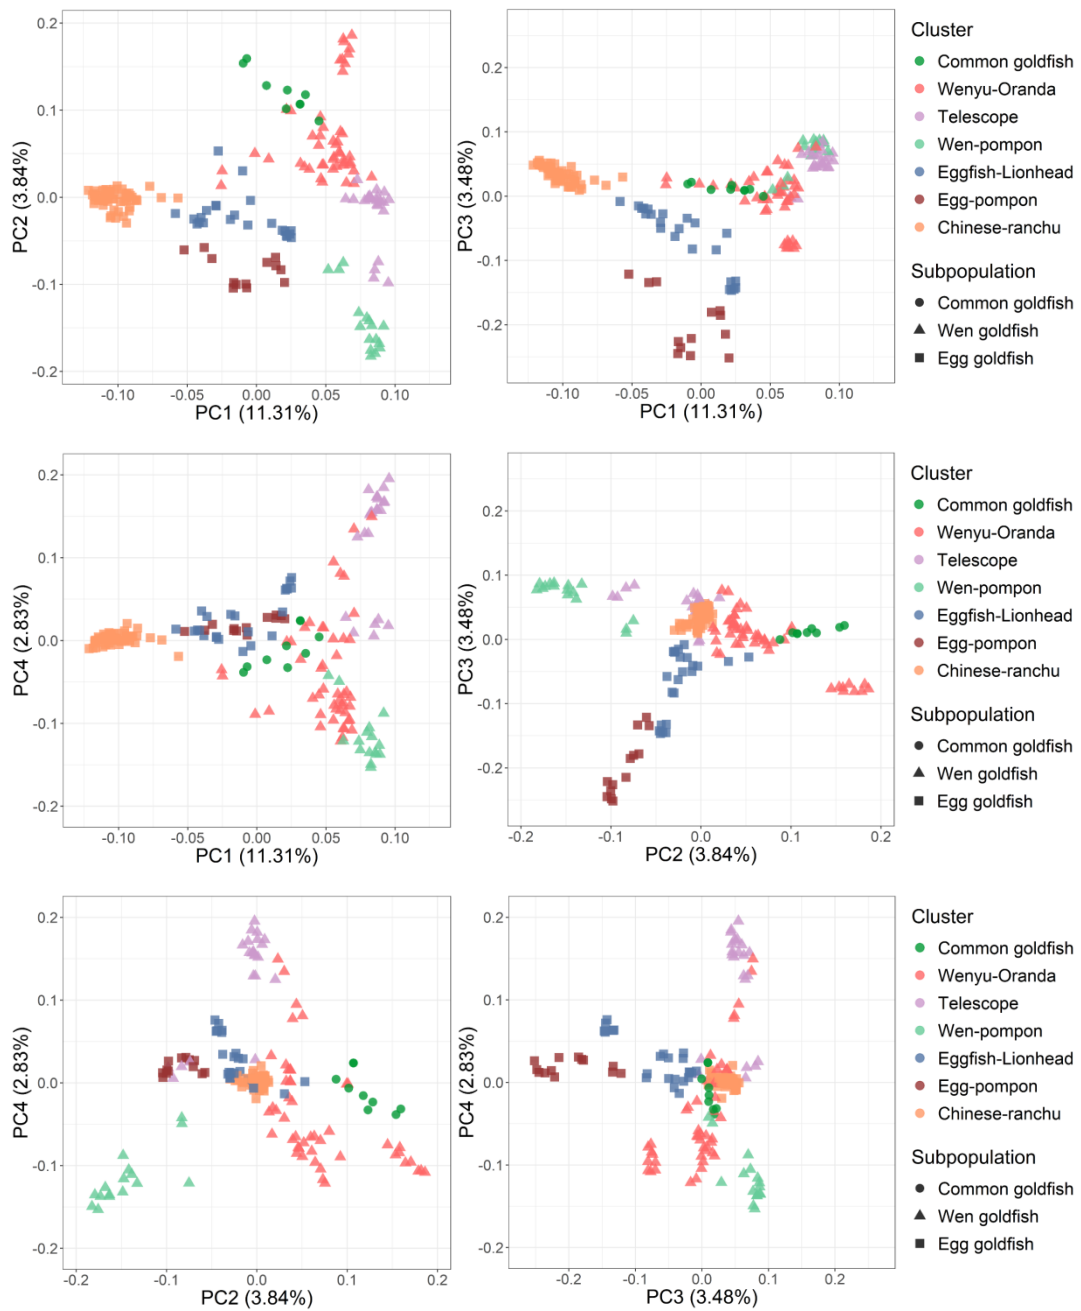

**Fig. S30.** Principal component SNP variation analysis for seven clusters within the 185 goldfish samples. Samples from the cluster of common goldfish, Wenyu-Oranda, telescope, Wen-pompon, Eggfish-Lionhead, Egg-pompon, and Chinese-ranchu are shown. The plots show the first two principal components.

**A**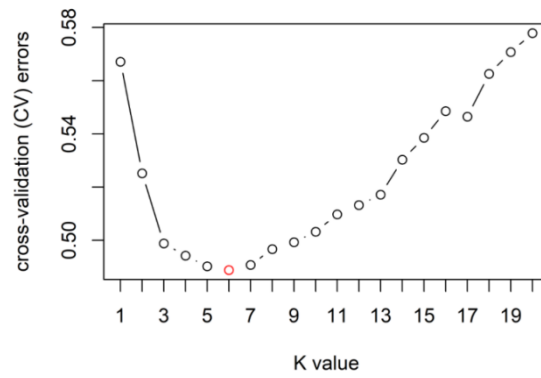**B**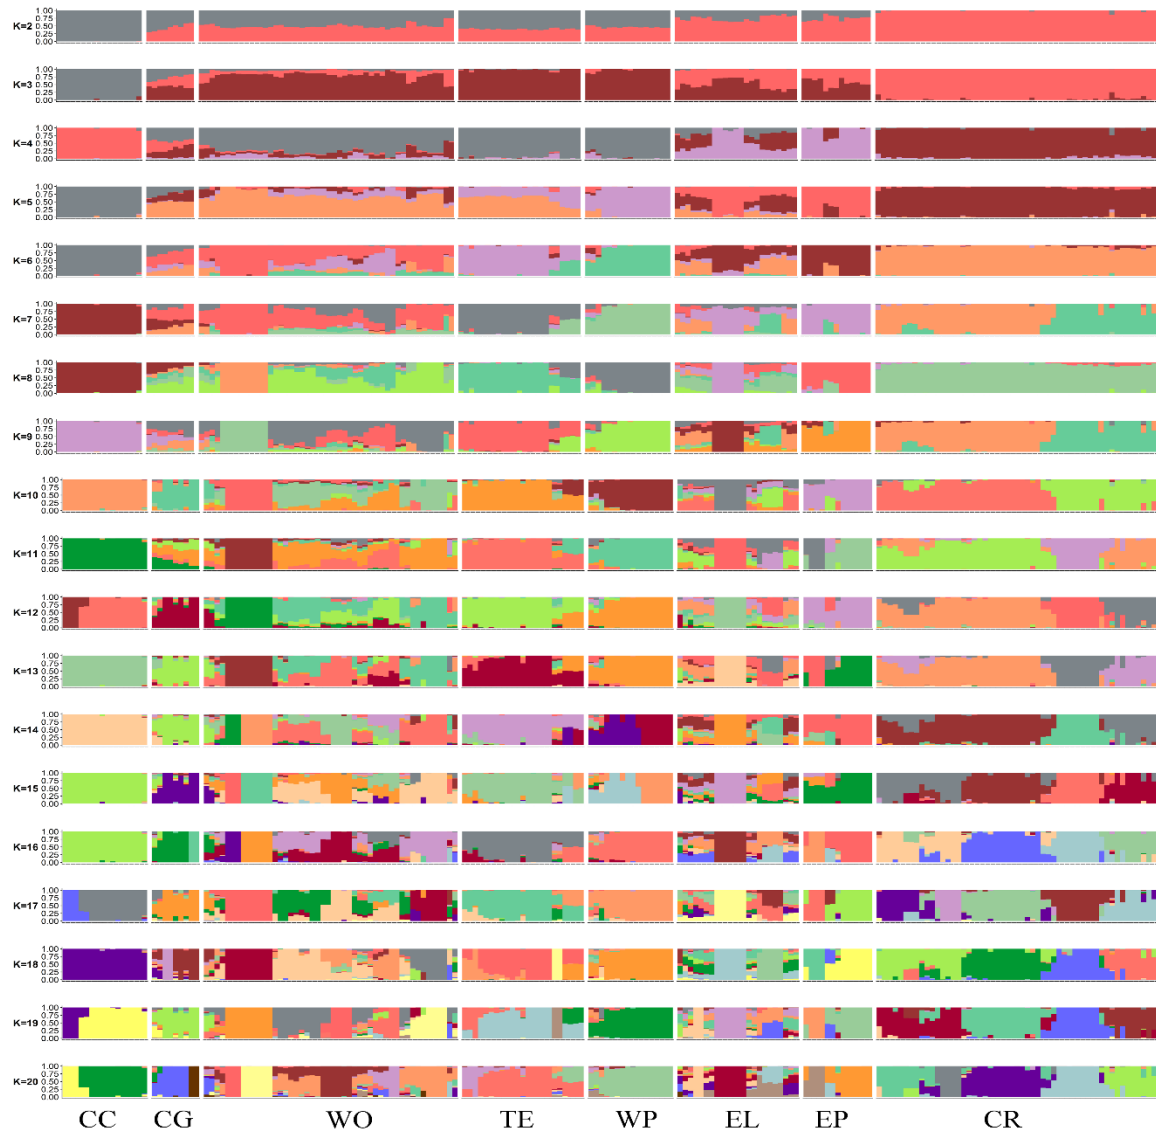

**Fig. S31.** Admixture results from K=2 to K=20. (a) Cross-validation errors showing K=6 is the optimal population cluster grouping. (b) Population from K=2 to K=20 showing the population structure. The number of groups (K value) is represented by different color codes, for instance K=6 can be divided into six groups by different colors as follows: group 1 of CC,

group 2 of CG and WO, group 3 of TE, group 4 of WP, group 5 of EL and EP, and group 6 of CR. The consanguinity of the WO species is closest to that of the common goldfish, indicating that the genes of the WO species are shared with the CG. CC, crucian carp; CG, common goldfish; WO, Wenyu-Oranda; TE, Telescope; WP, Wen-pompon; EL, Eggfish-lionhead; EP, Egg-pompon; CR, Chinese-ranchu.

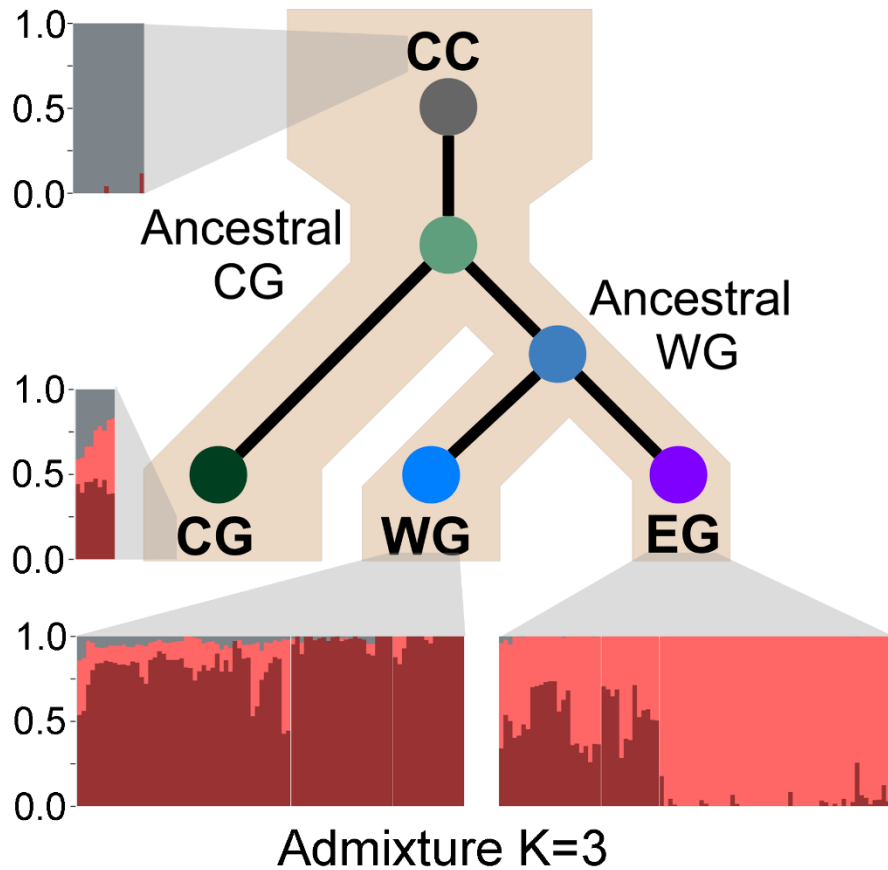

**Fig. S32.** Schematic diagram of the variation in the goldfish domestication history. Population from K=3 to show the population structure, CC, crucian carp; CG, common goldfish; WG, wen-goldfish; and EG, egg-goldfish. The number of groups (K value) is represented by different color codes; for instance, K=3 can be divided into three groups by different colors as follows: group 1 of CG, group 2 of WG, and group 3 of EG. The consanguinity of the WG species is the closest to that of the common goldfish, whereas EG is derived from WG by domestication and artificial selection, indicating that the genes of the WG species are shared with the EG species.



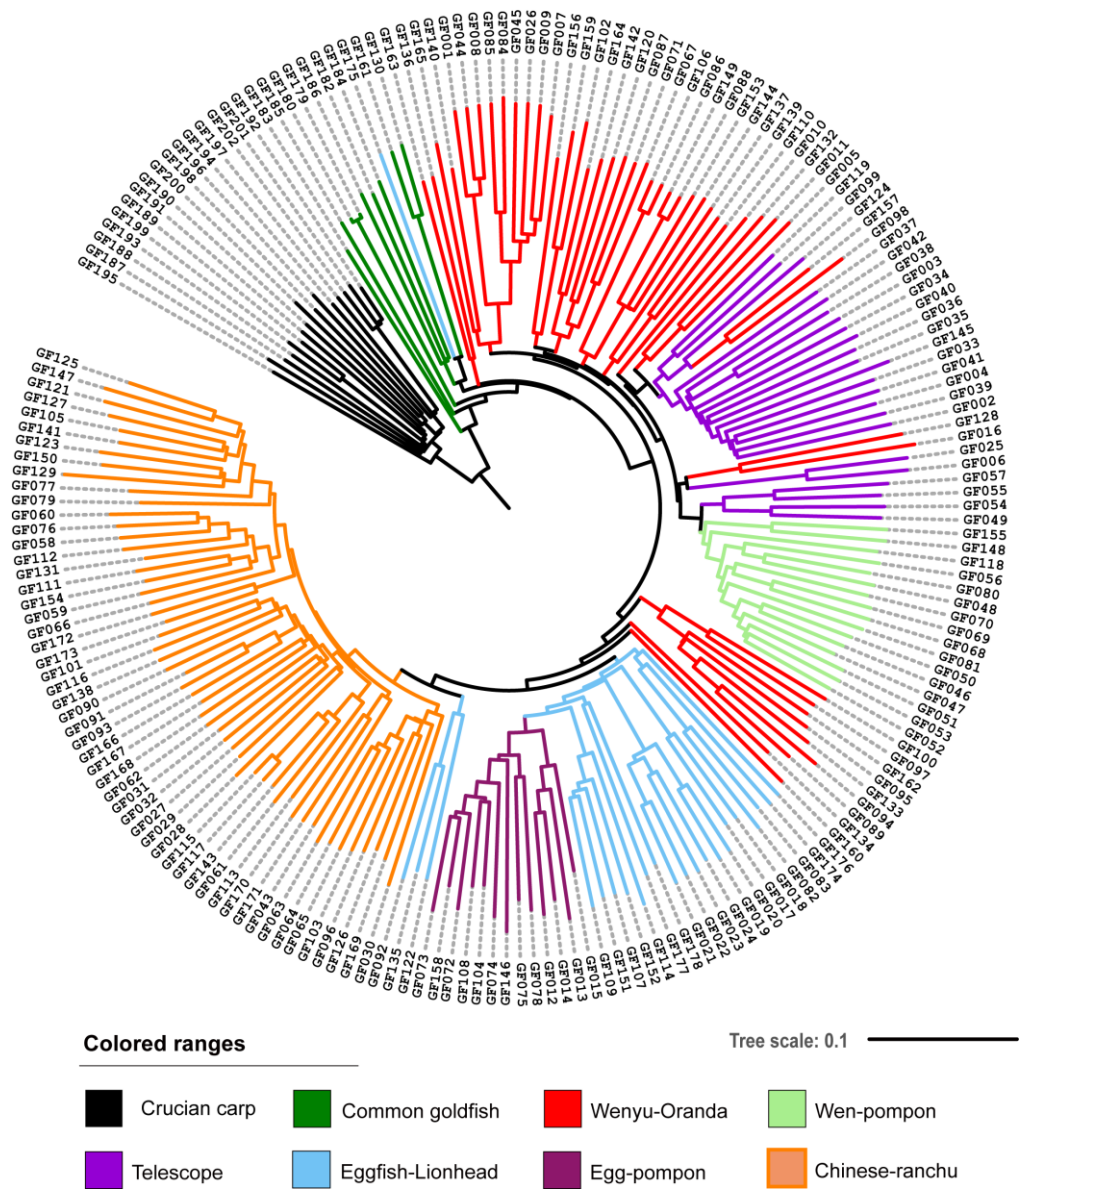

**Fig. S33.** Population phylogenetic relationship among 201 goldfish accessions. Binary search tree of 201 goldfish accessions (including 16 crucian carps) based on genetic distance. Color bars indicate accessions with different variation characteristics. The scale bar shows substitutions per site. The phylogenetic tree showed that crucian carp and goldfish were divided into two groups, Egg-goldfish and Wen-goldfish.

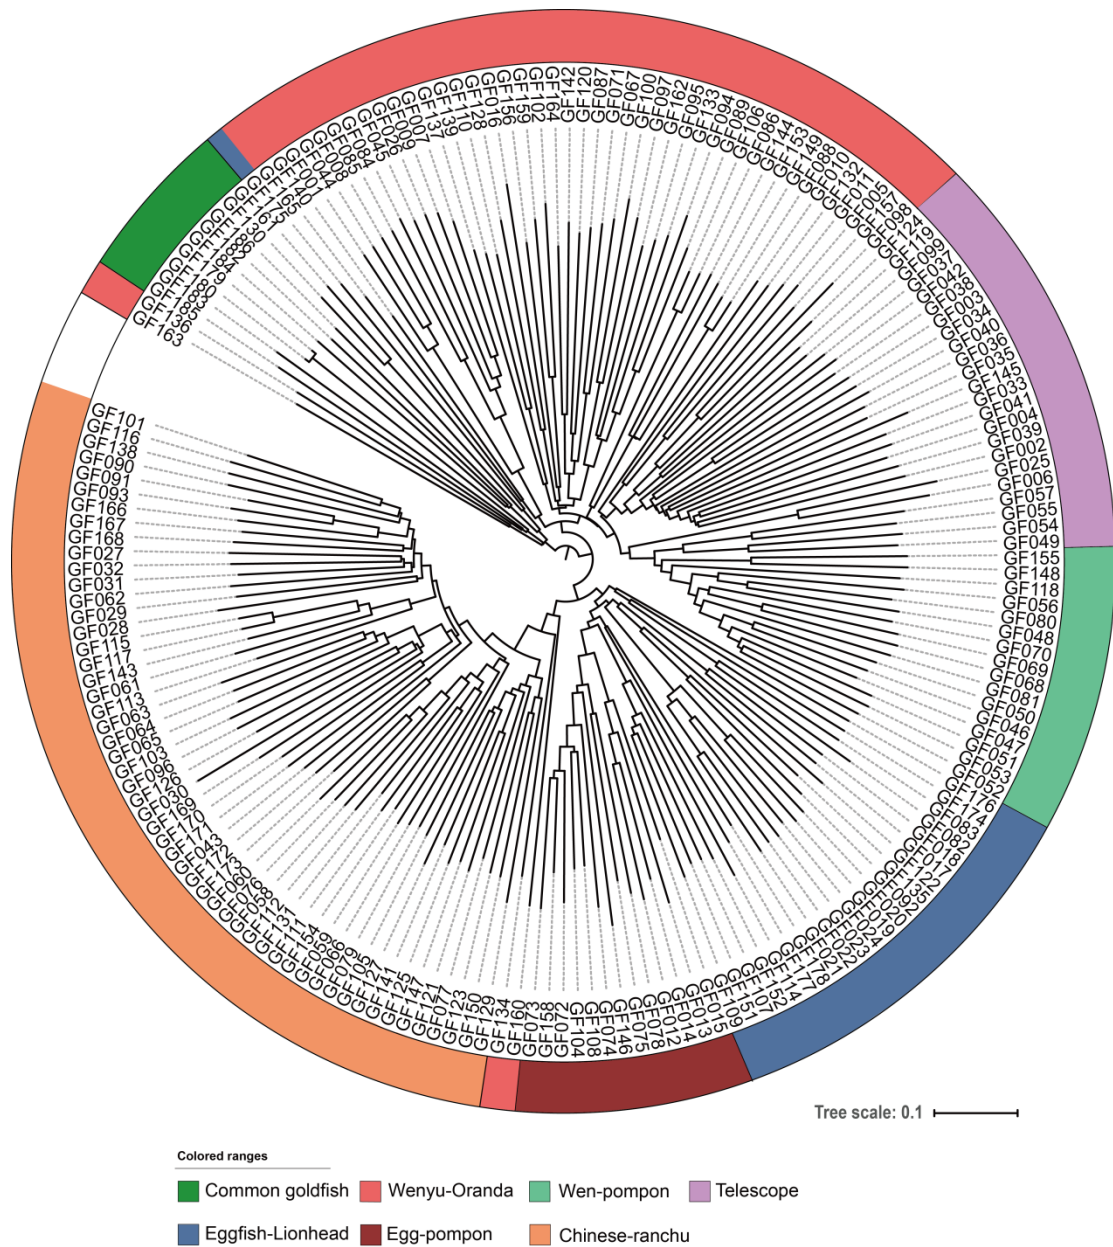

**Fig. S34.** Population phylogenetic relationship among 185 goldfish accessions. Binary search tree of 185 goldfish accessions (except for 16 crucian carps) based on genetic distance. Color bars indicate accessions with different variation characteristics. The scale bar shows substitutions per site. Among the 185 goldfish, common goldfish and Chinese-ranchu were significantly independent, whereas Egg-goldfish and Wen-goldfish were divided into two groups. The results indicate that the genetic relationship between the varieties telescope, Wen-pompon, and Egg-pompon was relatively close.

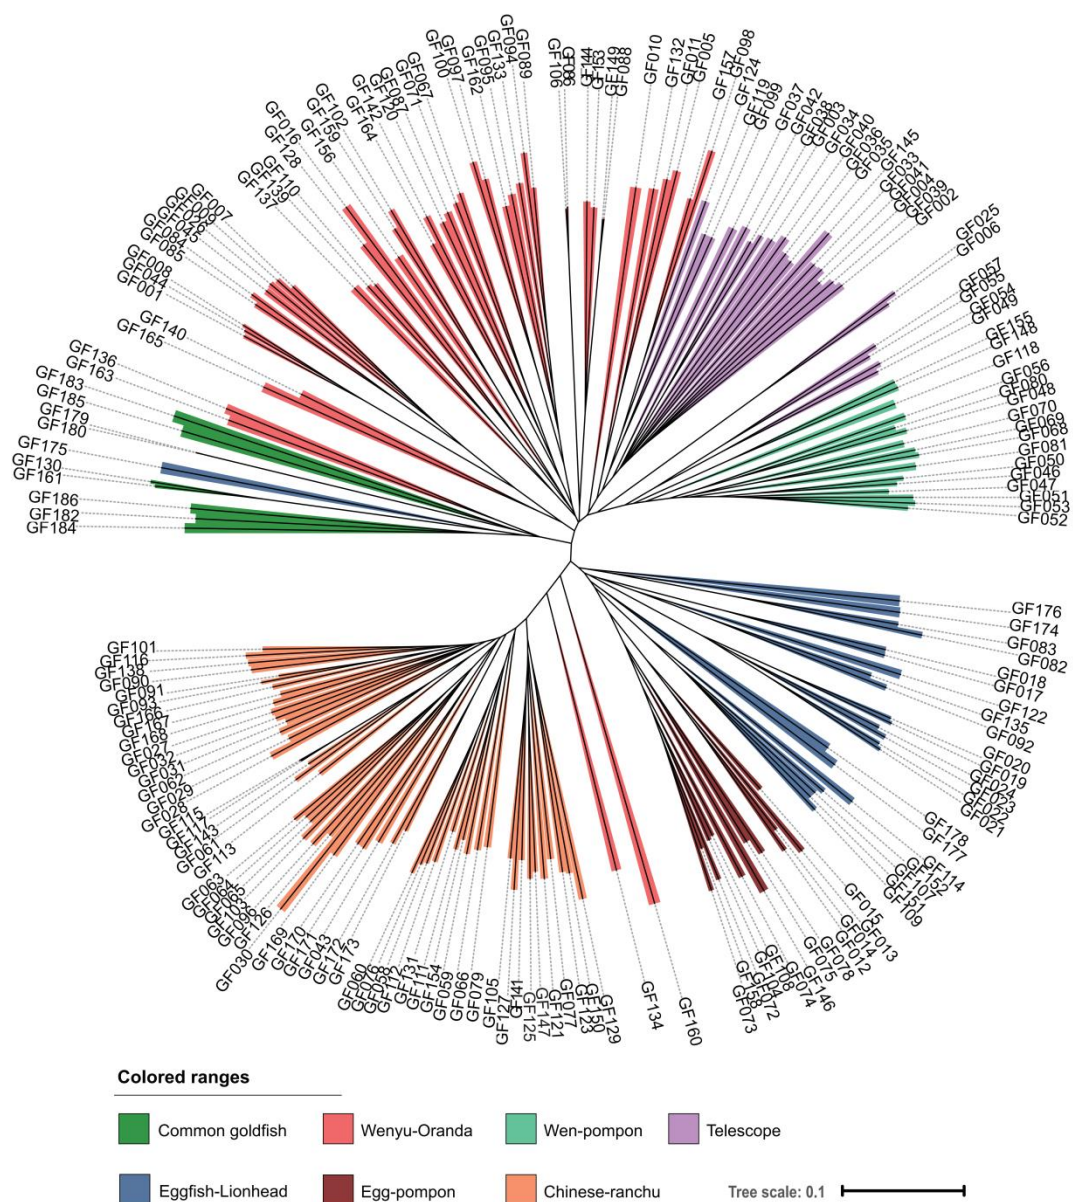

**Fig. S35.** Population phylogenetic relationship among 185 goldfish accessions. Neighbor-joining clustering of common goldfish, Wenyu-Oranda, telescope, Wen-pompon, Eggfish-Lionhead, Egg-pompon, and Chinese-ranchu based on genetic distance. Branch color indicates membership in one of eight classified goldfish populations. The scale bar shows substitutions per site. Among the 185 goldfish accessions, common goldfish and Chinese-ranchu were significantly independent, whereas Egg-goldfish and Wen-goldfish were divided into two groups. The result indicated that the genetic relationship between the varieties telescope, Wen-pompon, and Egg-pompon was relatively close.



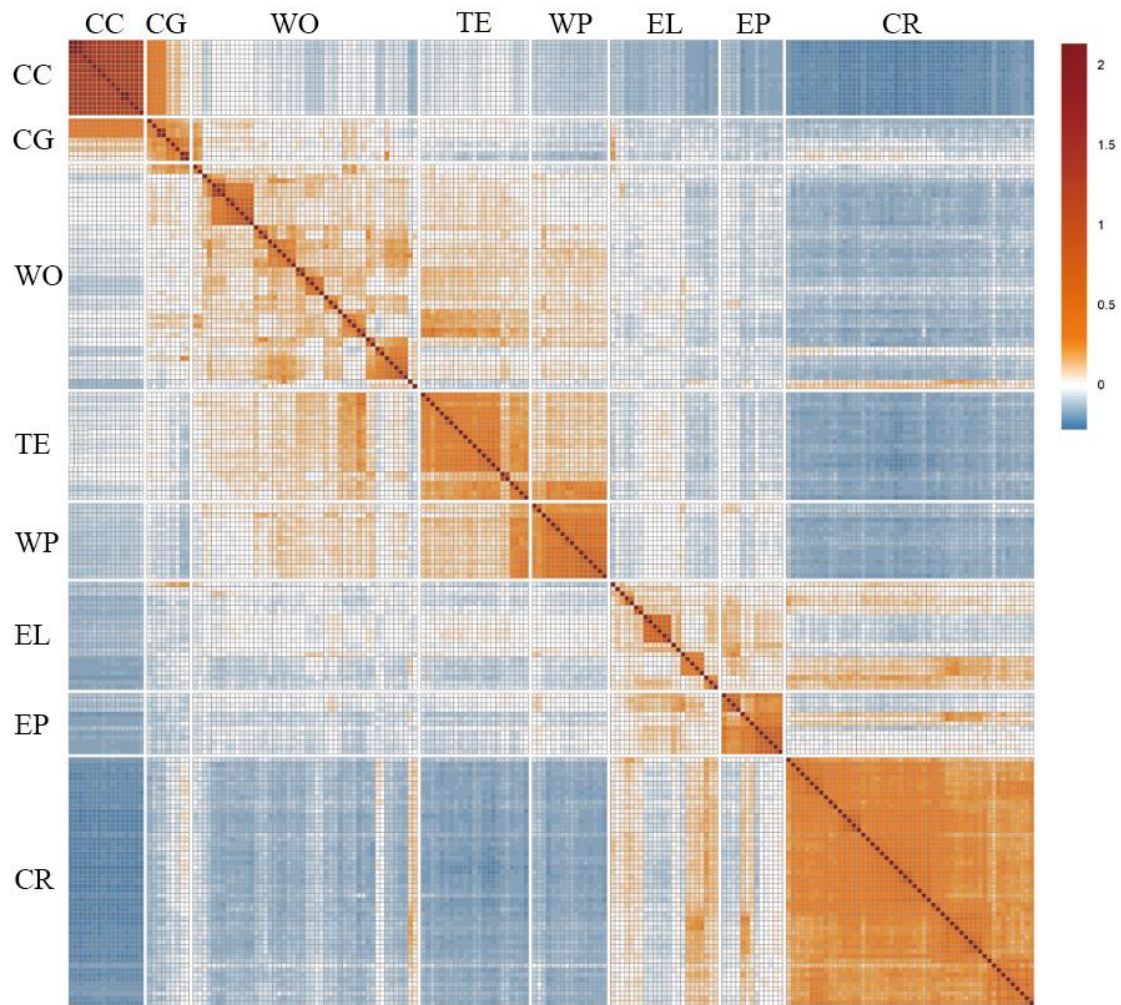

**Fig. S36.** Heatmap of pairwise genetic relatedness score matrix of genotyped individuals of curcian carps and goldfishes. The scale unit is the genetic relatedness score. CC, crucian carp; CG, common goldfish; WO, Wenyu-Oranda; TE, telescope; WP, Wen-pompon; EL, Eggfish-Lionhead; EP, Egg-pompon; and CR, Chinese-ranchu.

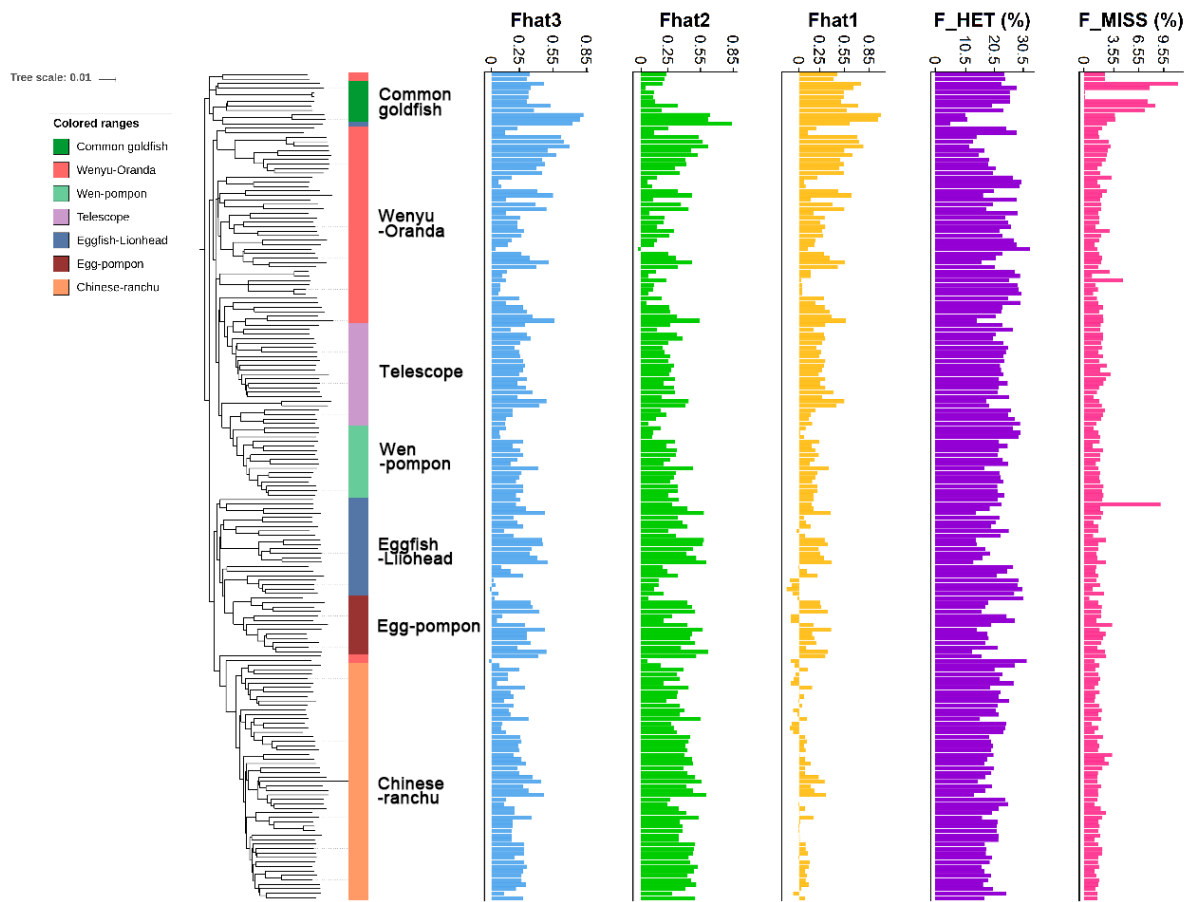

**Fig. S37.** Five genetic features of individuals across the phylogenetic tree of 185 goldfish. Fhat1~Fhat3, three inbreeding coefficients calculated by plink; F\_HET (%), proportion of heterozygous genotypes; and F\_MISS (%), proportion of missing genotypes. As shown in the figure, the inbreeding number of each sample was analyzed. There was no error in the heterozygous and gene deletion ratio of the 185 goldfishes.

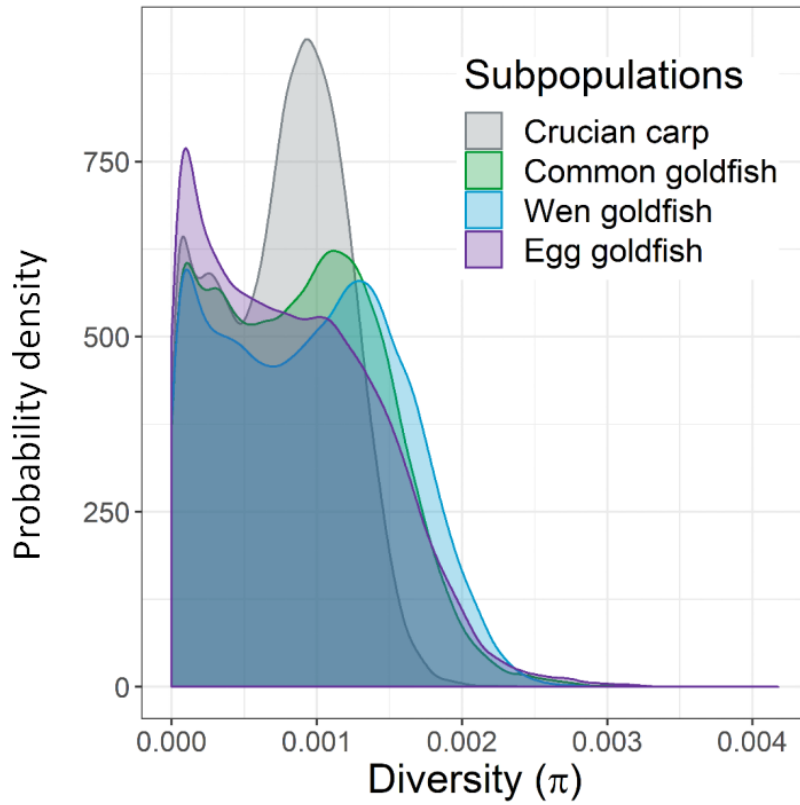

**Fig. S38.** Level of genetic diversity ( $\pi$ ) in each subpopulation of goldfish and crucian carp. The Y-axis is the probability density of the distribution of the average  $P$  value in a nonoverlapping window of 100 kb.

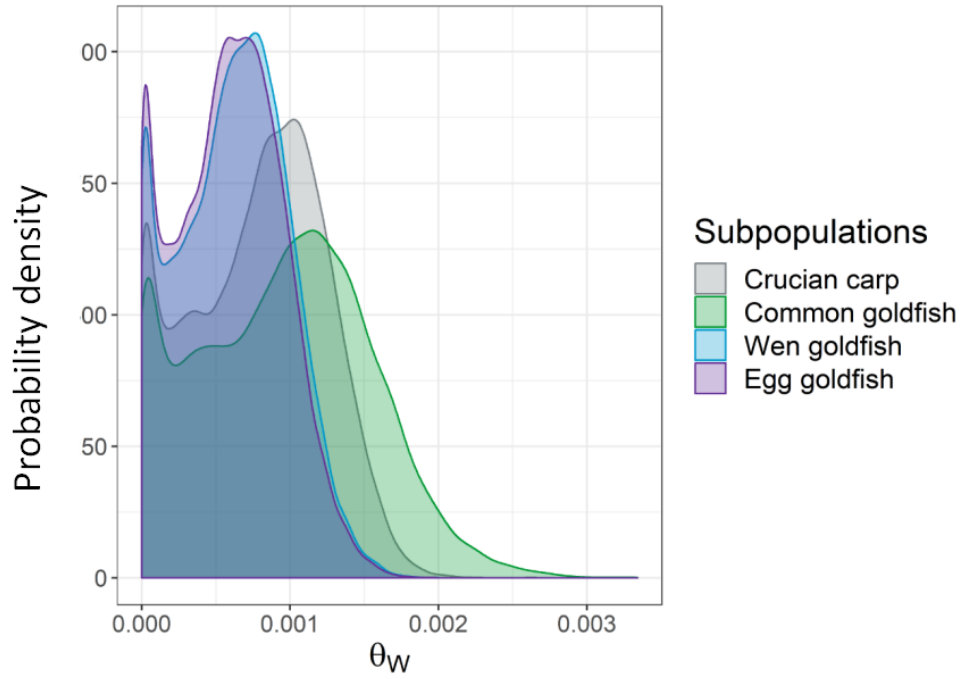

**Fig. S39.** Level of Watterson's theta( $\theta_w$ ) in each subpopulation of goldfish and crucian carp. The Y-axis is the probability density of the distribution of the average  $P$  value in a nonoverlapping window of 100 kb.

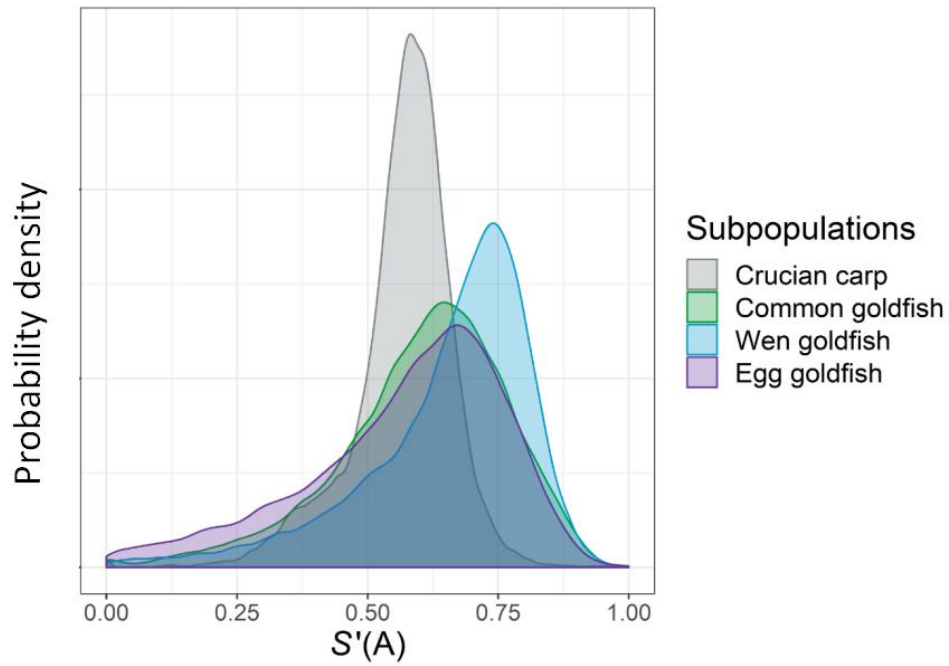

**Fig. S40.** Distributions of allele frequency-based relative Shannon entropy denoted by  $S'(A)$ , calculated in the crucian carp subpopulation, common goldfish subpopulation, Wen-goldfish subpopulation, and Egg-goldfish subpopulation. The Y-axis is the probability density of the distribution of the average  $P$  value in a nonoverlapping window of 100 kb.



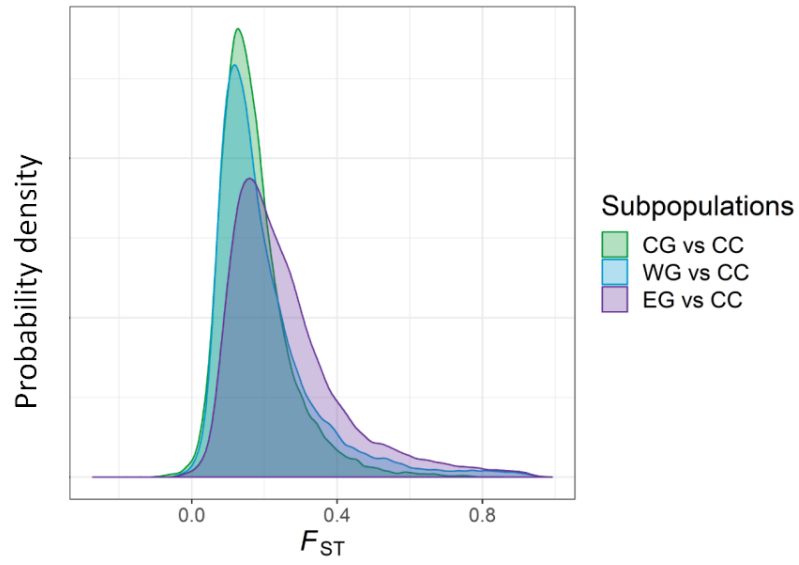

**Fig. S41.** Fst value distribution of goldfish subpopulations. The Y-axis is the probability density of the distribution of the average  $P$  value in a nonoverlapping window of 100 kb. CG, common goldfish; CC, crucian carp; WG, Wen-goldfish; and EG, Egg-goldfish.

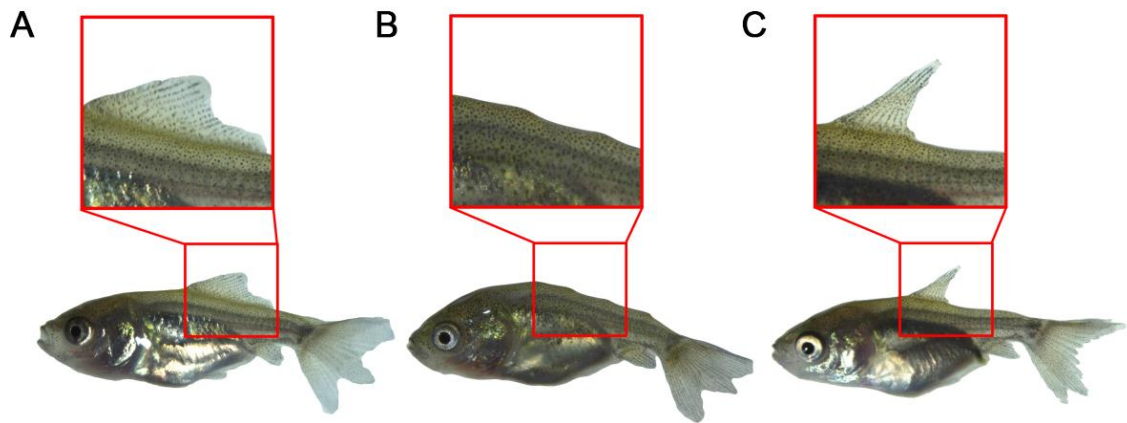

**Fig. S42.** Phenotypic variants of the dorsal fin in the F1 population. (A) Normal dorsal fin. (B) Lack of dorsal fin. (C) Abnormal dorsal fin. The sharp abnormal and normal dorsal fins are an acute and obtuse triangle, respectively.

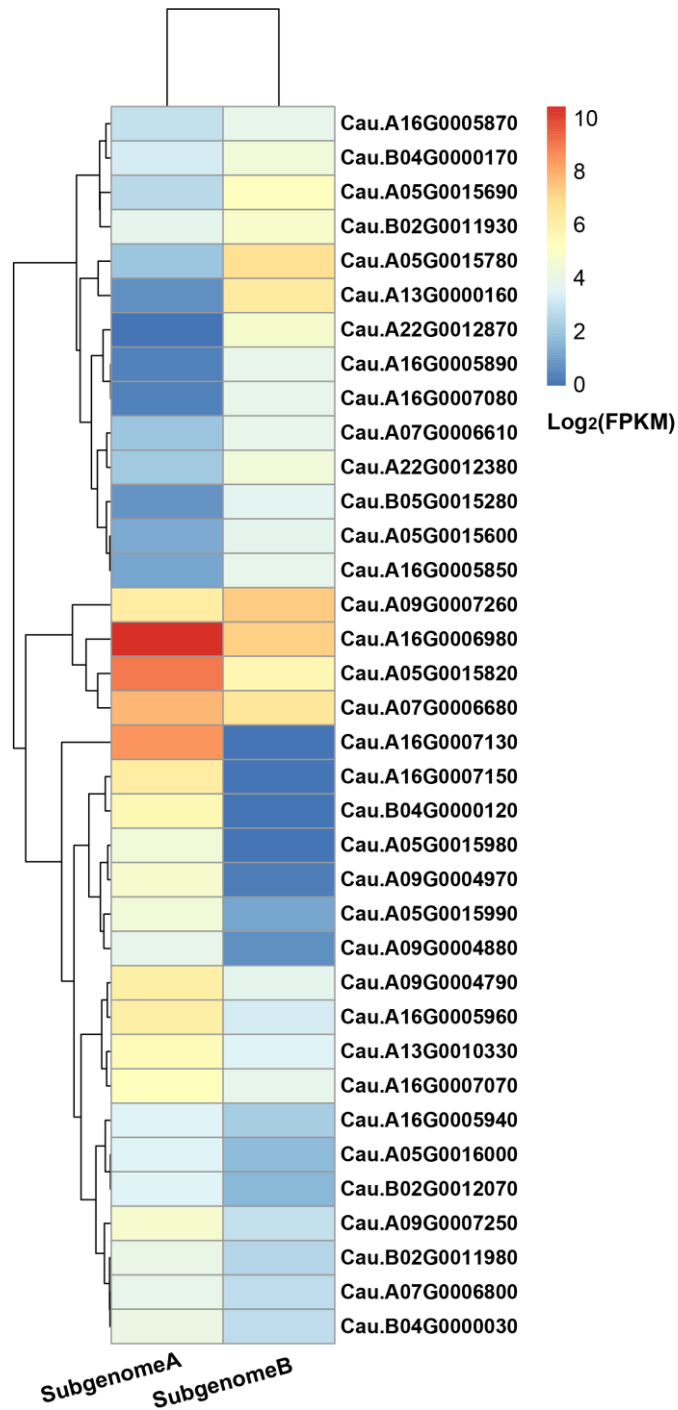

**Fig. S43.** Primary of dorsal fin GWAS associated genes dominant expressed in subgenome A. Of the 378 dominant expressed genes in subgenomes A or B, 36 genes were clustered by base expression.

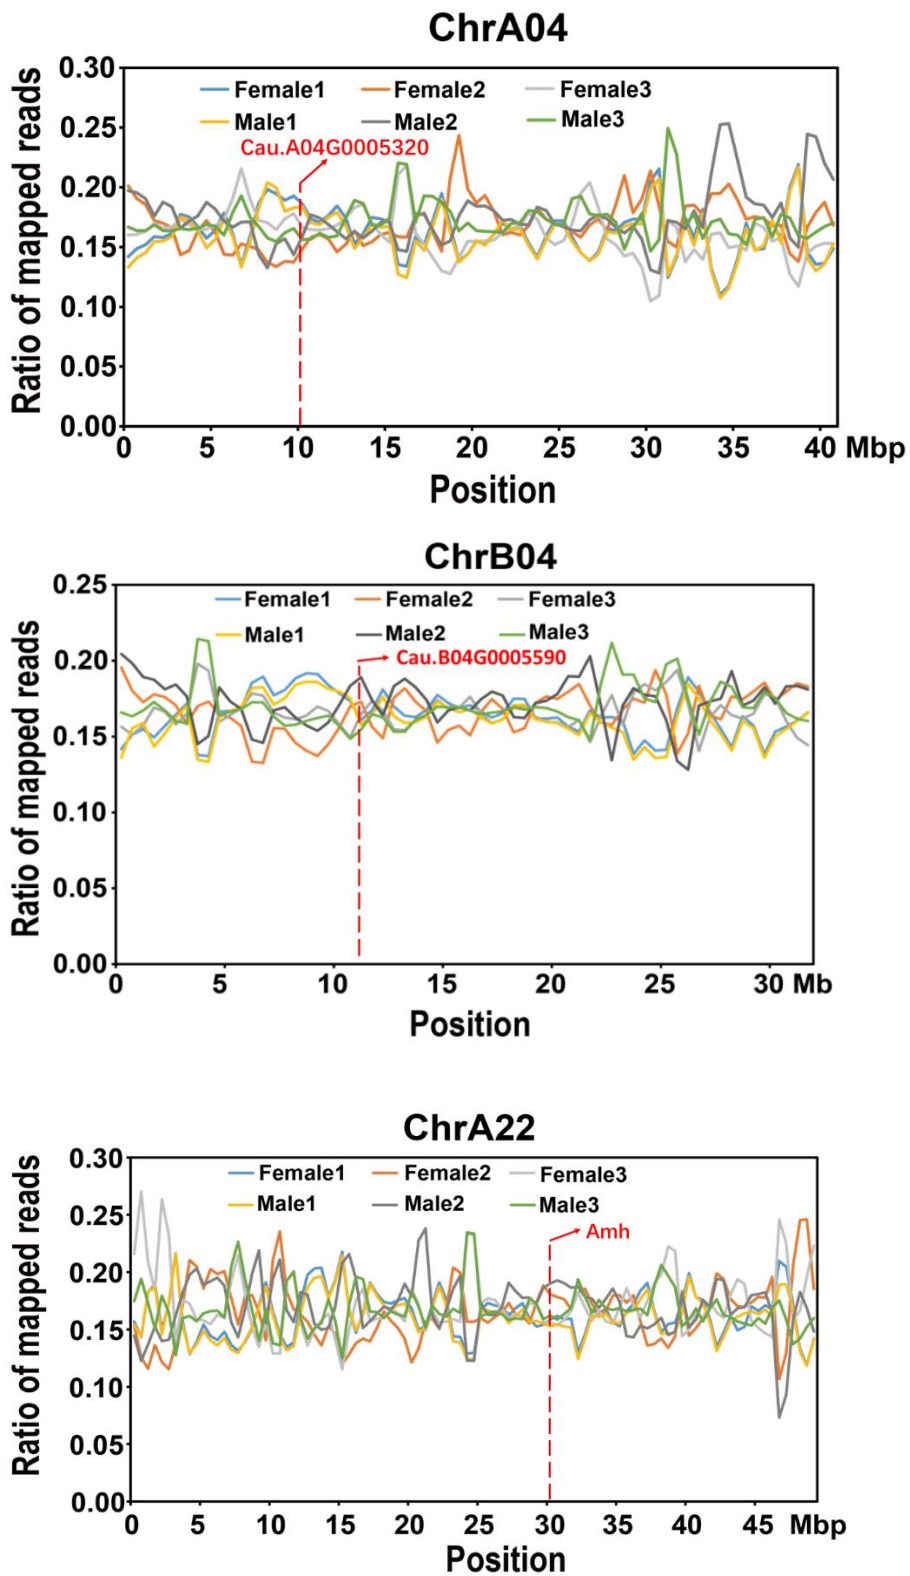

**Fig. S44** Distribution of reads from three females and three males mapped against the goldfish ChrA04, ChrB04 and ChrA22. The X-axis and Y-axis indicate chromosome position (Mb) and ratio of mapped reads on the goldfish chromosomes, respectively.

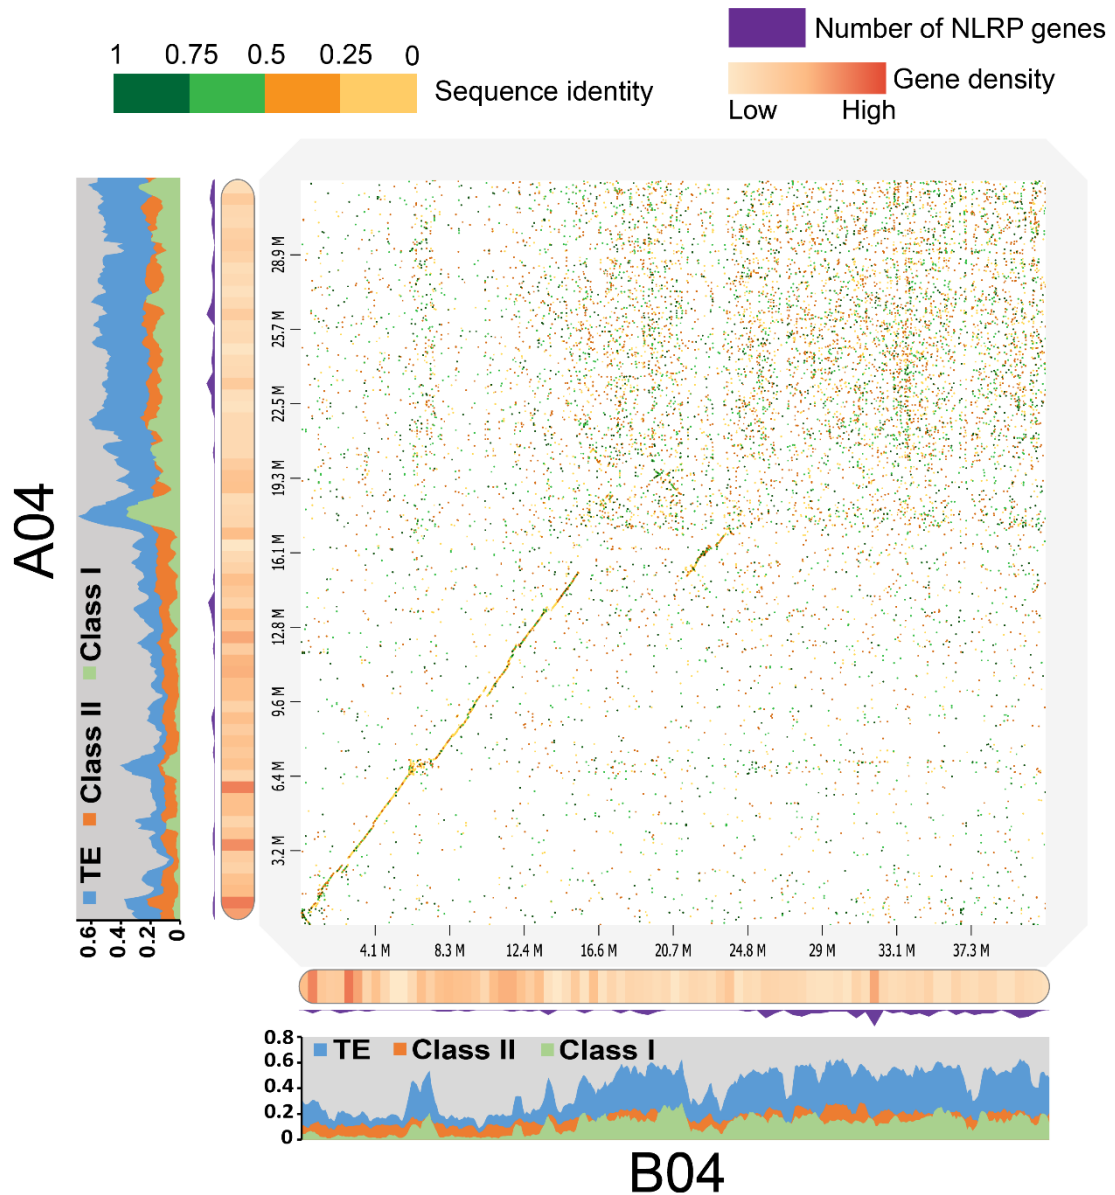

**Fig. S45.** Structural overview and comparison of chromosomal pseudomolecules ChrA04 and ChrB04. The distributions of transposable elements (TEs) are represented as stacked areas, and the density of innate immunity-related genes is highlighted with purple peaks within the corresponding regions. In the dotplot comparison, note the genomic character of the nonsynteny region, indicating that the highly divergent region displayed pooled collinearity and abundant TE and innate immunity-related gene (NLRP) content. The gene content is represented with a heatmap.

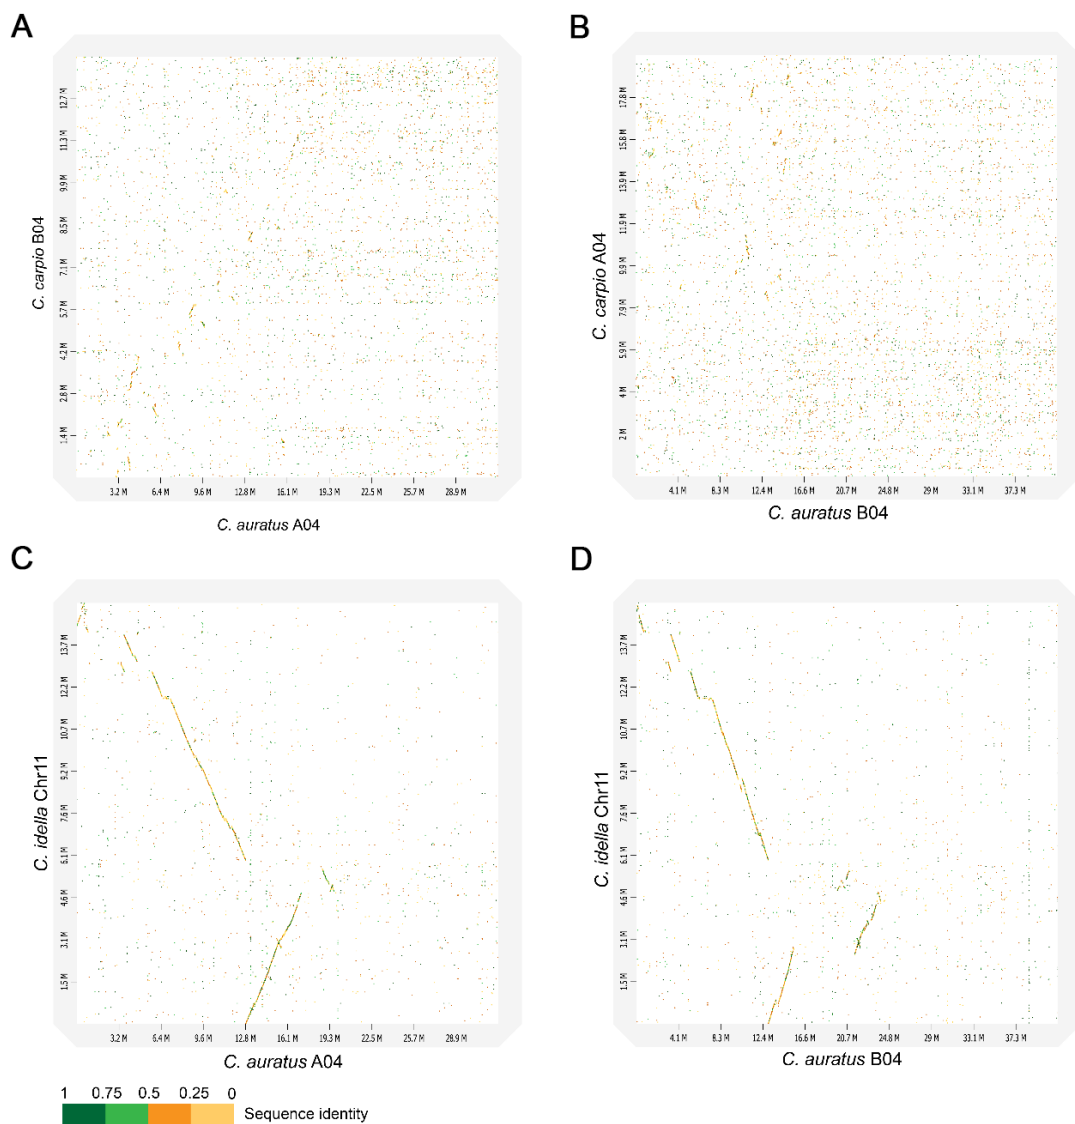

**Fig. S46.** Structural overview and comparison of chromosomal pseudomolecules ChrA04 and ChrB04 of *C. auratus* with the homologous chromosomes of *C. carpio* and *C. idella*. (A and C) Collinearity between ChrA04 of *C. auratus* with its homolog chromosome Chr7 in *C. carpio* and Chr11 in *C. idella*. (B and D) Collinearity between ChrB04 of *C. auratus* with its homolog chromosome Chr8 in *C. carpio* and Chr11 in *C. idella*.

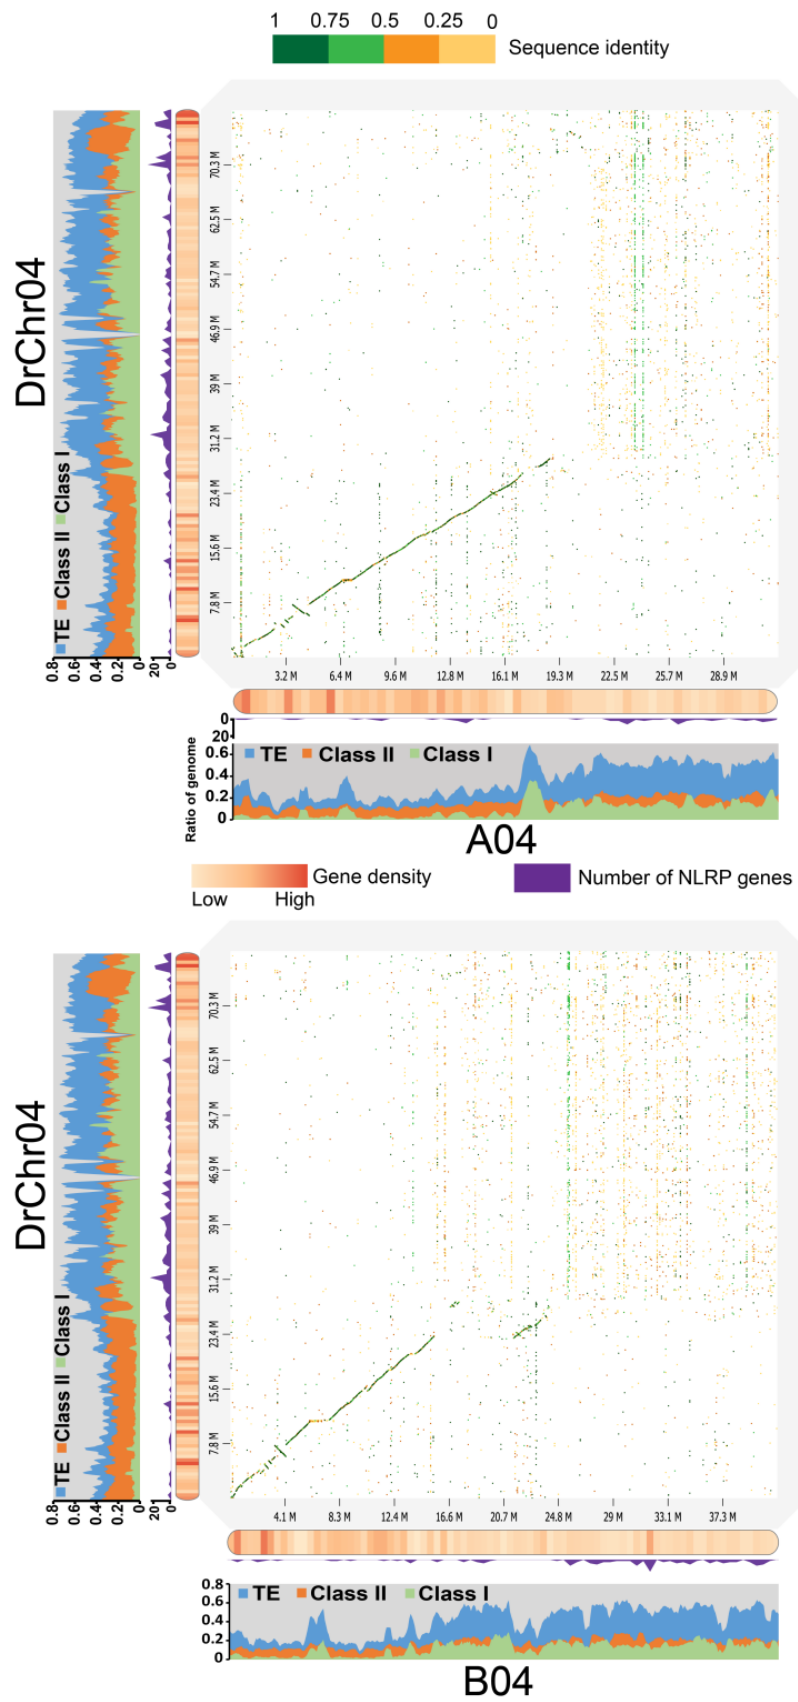

**Fig. S47.** Structural overview and comparison of chromosomal pseudomolecules ChrA04 and ChrB04 of *C. auratus* with the homologous chromosome Chr04 of *D. rerio*.





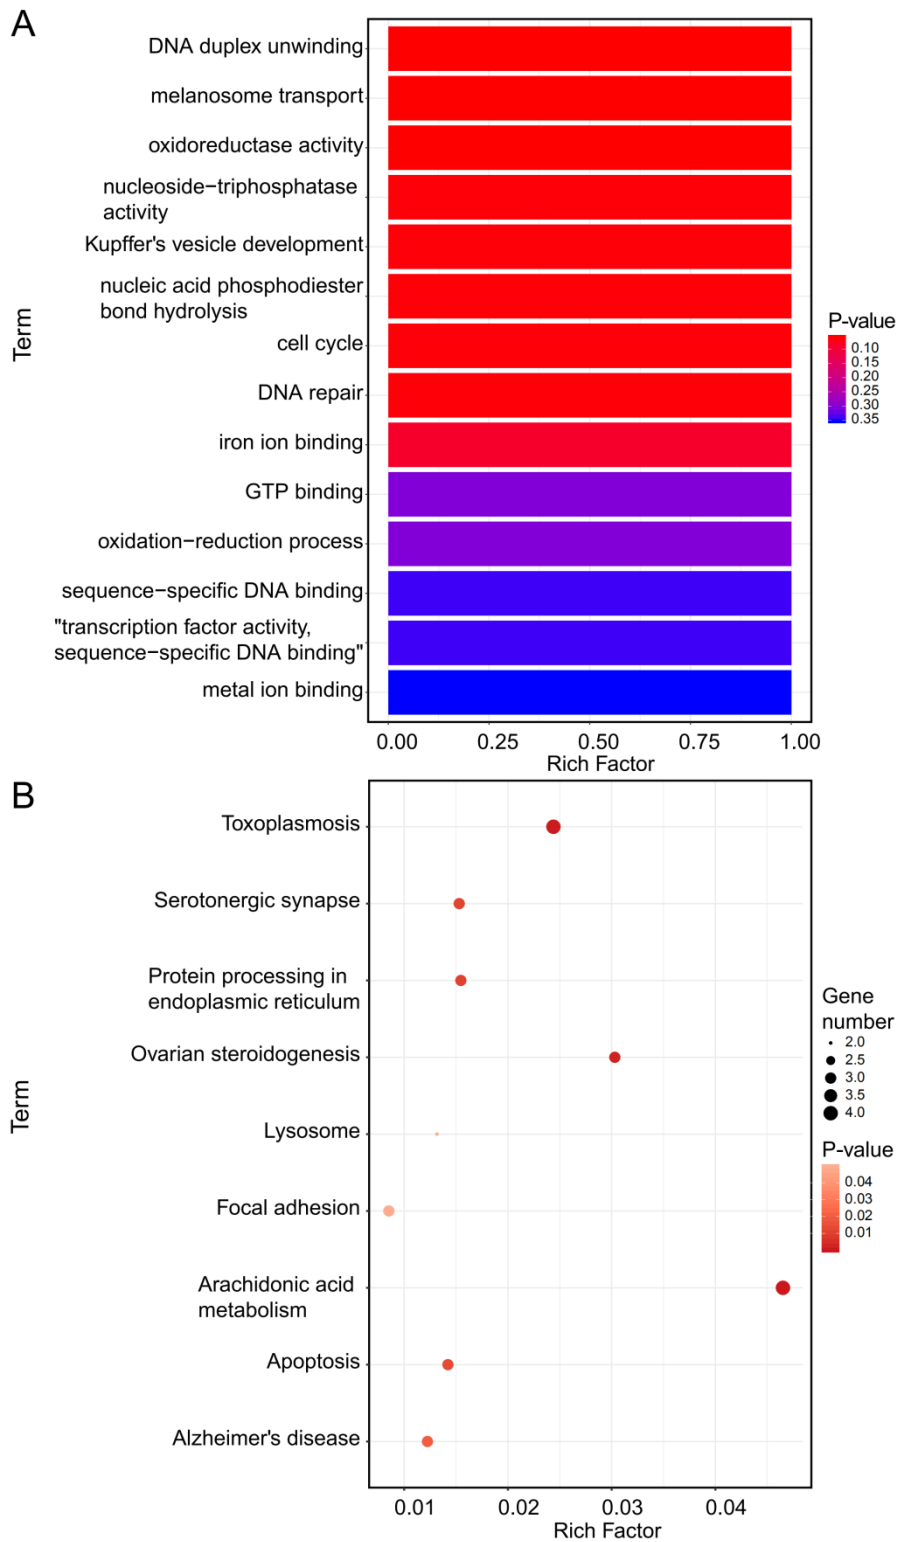

**Fig. S48.** GO term and KEGG pathway enrichment for the genes in the noncollinear region of ChrA04 in *C. auratus*. (A) GO term enrichment showing that the dominantly expressed homoeologs of Chr4 were primarily enriched in DNA duplex unwinding, oxidoreductase activity, etc. (B) KEGG pathway analysis indicating that dominantly expressed homoeologs of ChrA04 mainly participate in processes, such as protein processing, endoplasmic reticulum, and focal adhesion.



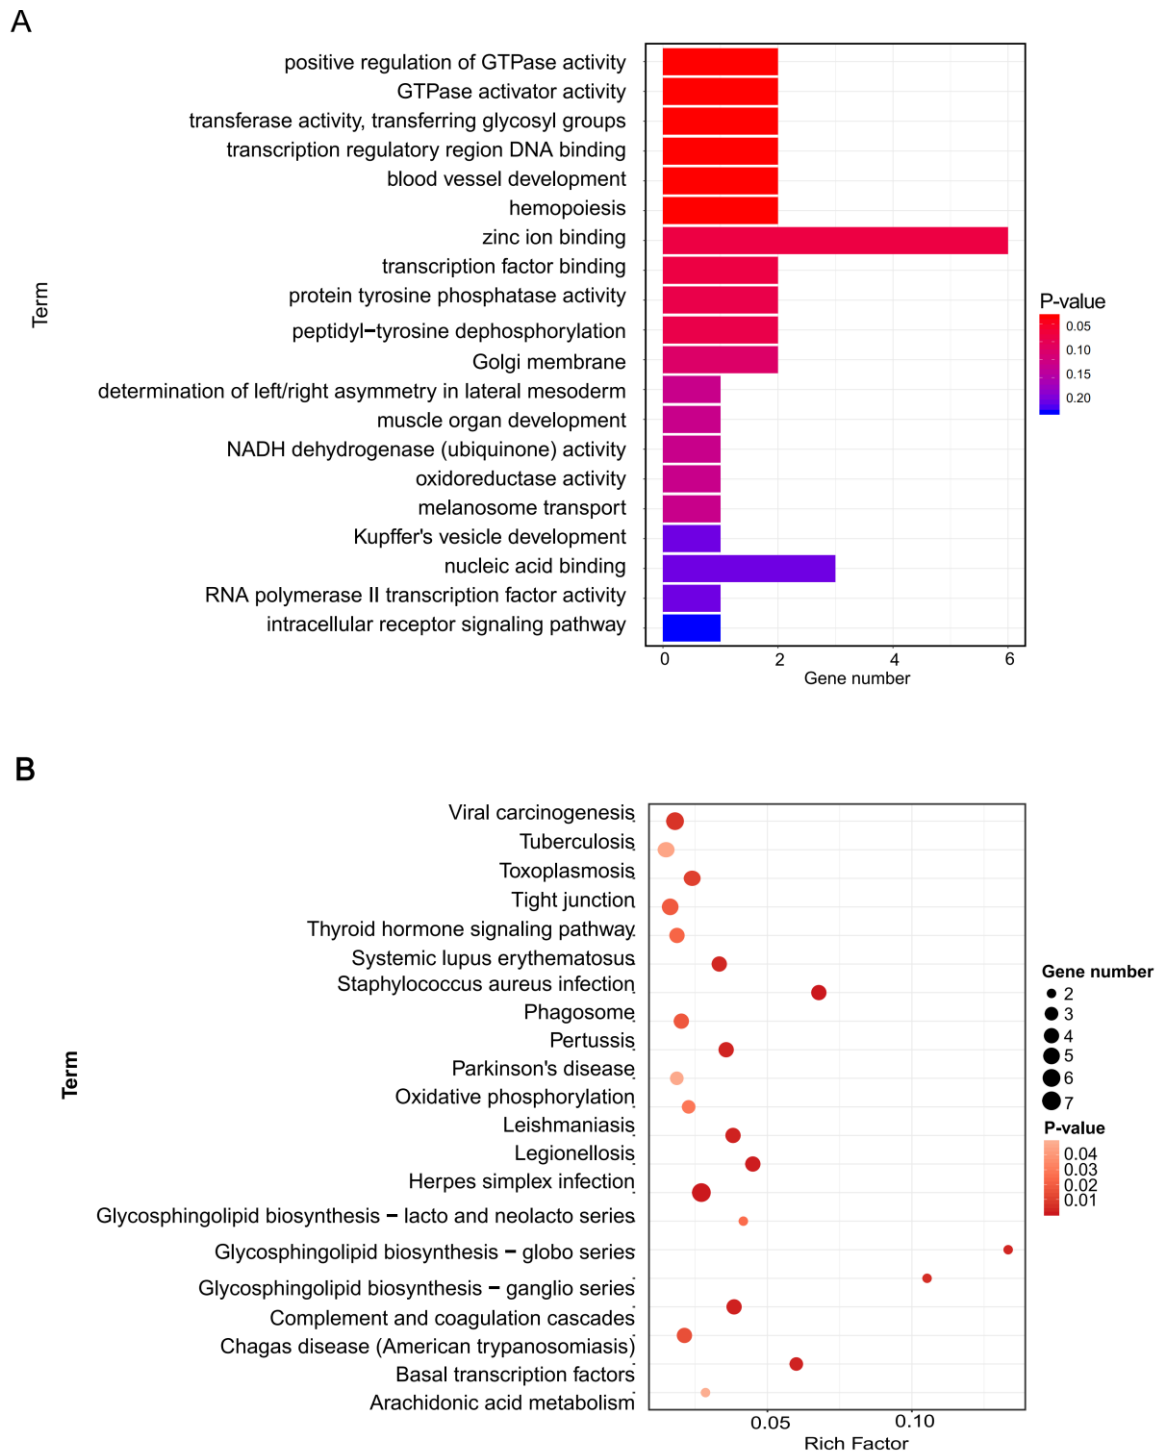

**Fig. S49.** GO term and KEGG pathway enrichment for the genes in the noncollinear region of ChrB04 in *C. auratus*. (A) GO term enrichment showing that the dominantly expressed homoeologs of ChrB04 were primarily enriched in factors, such as zinc ion binding, transcription factor binding, and GTPase activator activity. (B) KEGG pathway analysis indicating that the dominantly expressed homoeologs of ChrB04 mainly participate in processes such as tight junctions and oxidative phosphorylation.

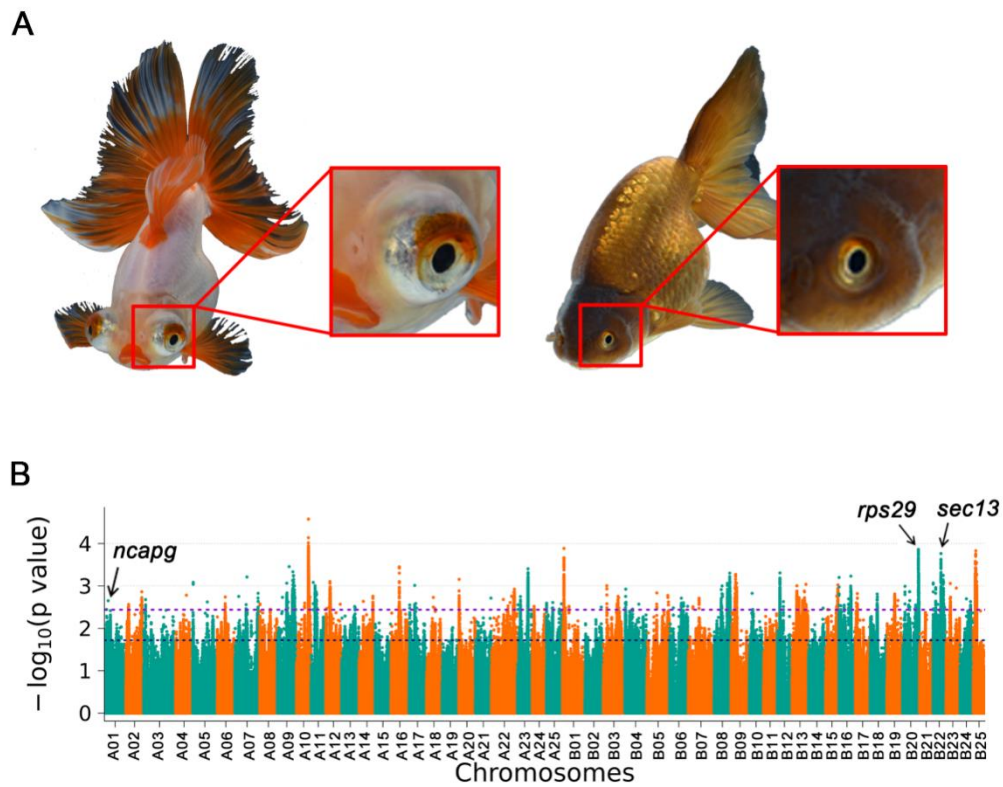

**Fig. S50.** Phenotypic variants of telescope eye in the goldfish population for GWAS. (Aa) Left, telescope eye: right, normal eye; (B) Manhattan plot for telescope eye GWAS in the goldfish population. Genes surrounding or covering peaks are indicated. The genome-wide threshold of 2.5 was defined to confirm selective sweeps by the top 1% of  $-\log_{10}(P)$  values.

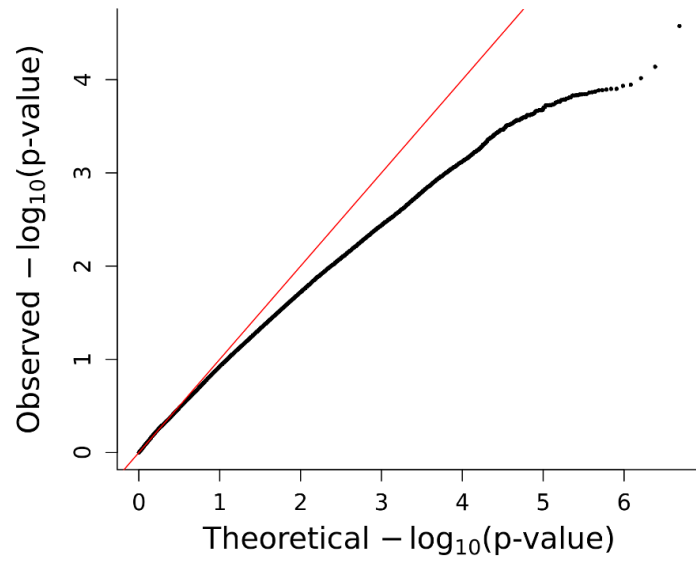

**Fig. S51.** Quantile-quantile plot for telescope eye GWAS under a general linear model.

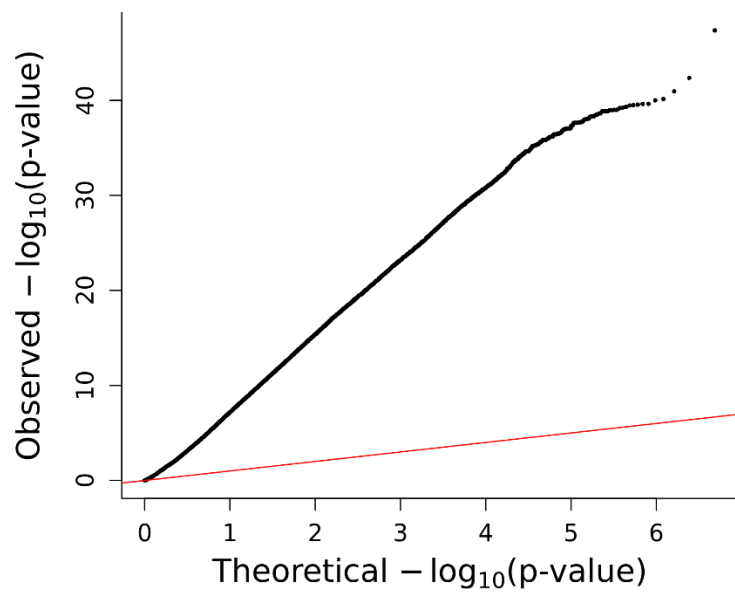

**Fig. S52.** Quantile-quantile plot for telescope eye GWAS under a general linear model.

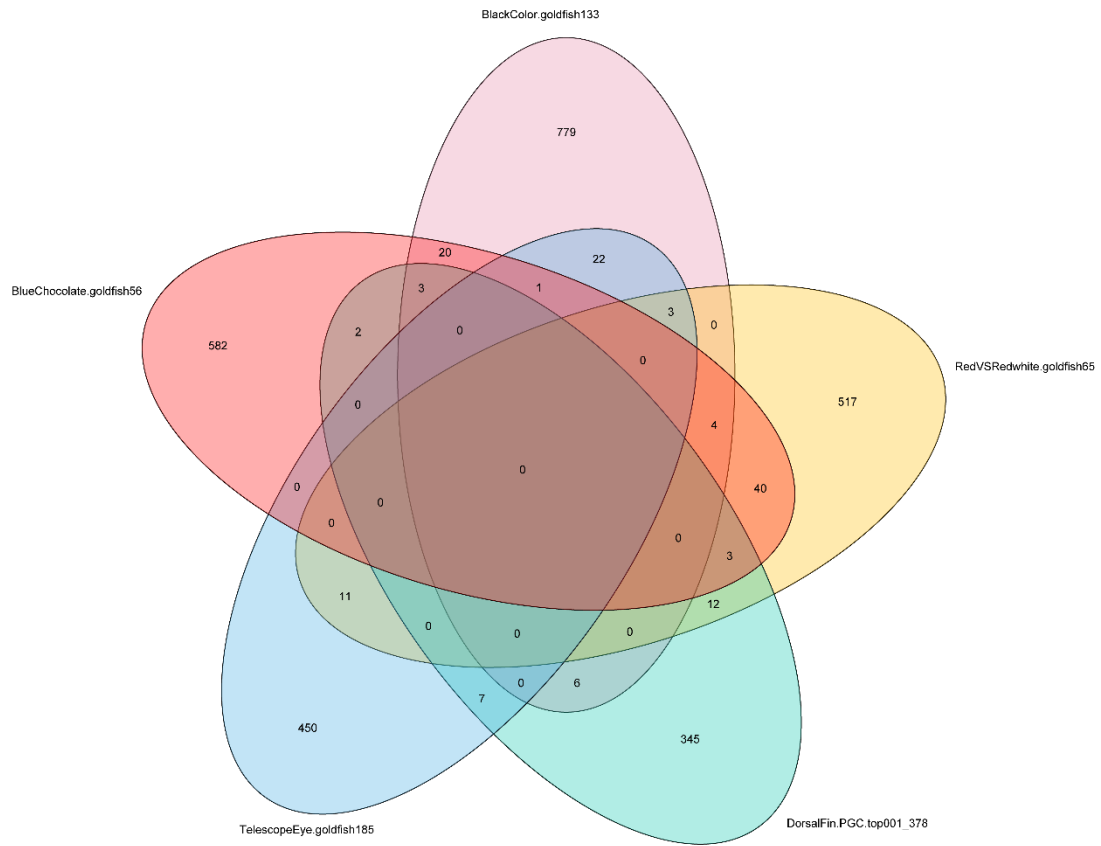

**Fig. S53.** Venn diagram of candidate genes from different phenotype GWAS.

A

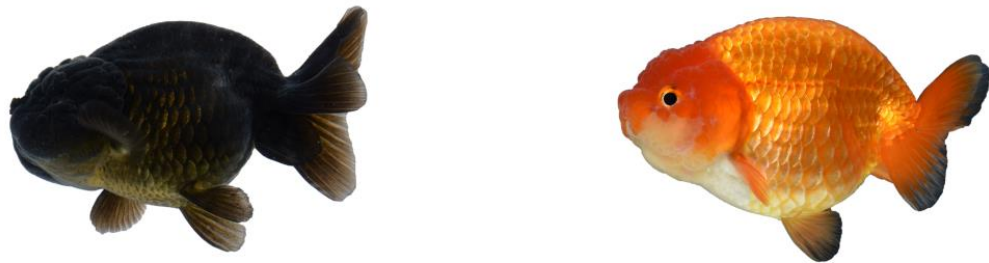

B

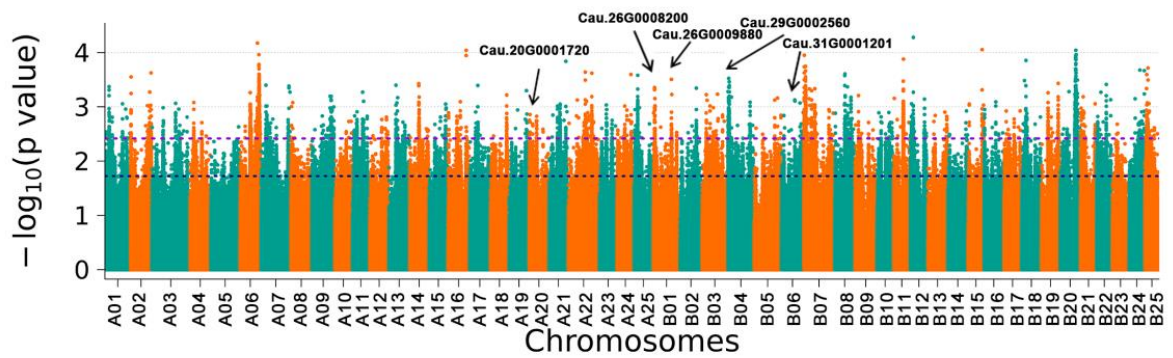

**Fig. S54.** Phenotypic variants of black-red color in goldfish population for GWAS. (A) Left, black morph; right, red morph; (B) Manhattan plot for black-red color GWAS in goldfish population. Genes surrounding or covering peaks are indicated. The genome-wide threshold of 2.5 was defined to confirm selective sweeps by the top 1% of  $-\log_{10}(P \text{ value})$  values.



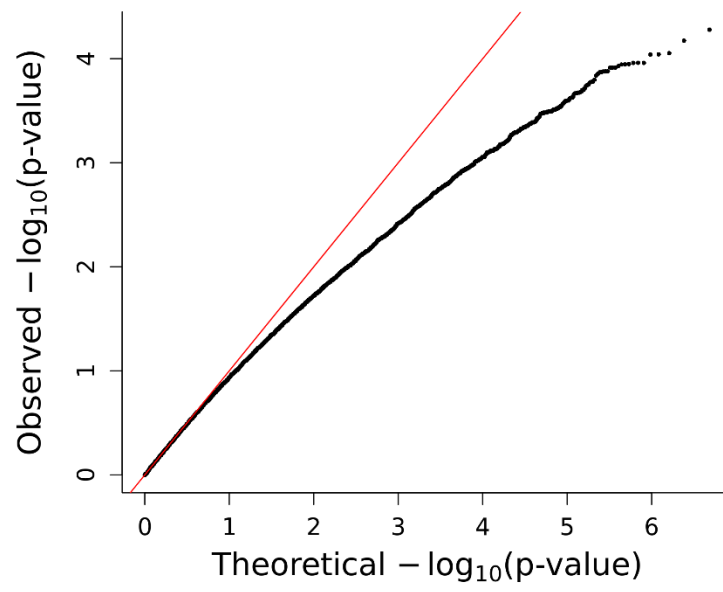

**Fig. S55.** Quantile-quantile plot for black-red color GWAS under a general linear model.

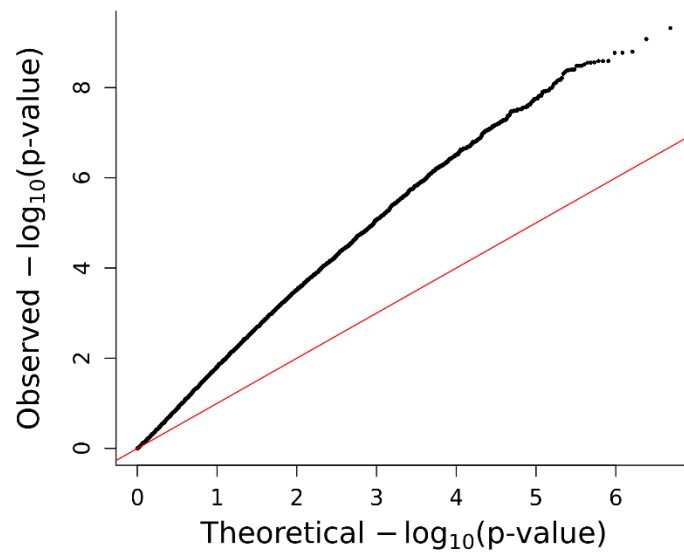

**Fig. S56.** Quantile-quantile plot for black-red color GWAS under a general linear model.

A

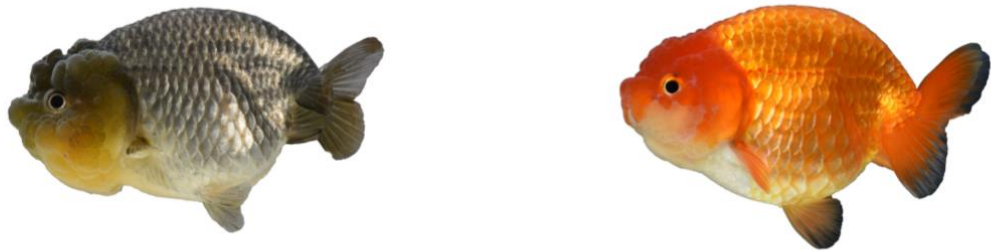

B

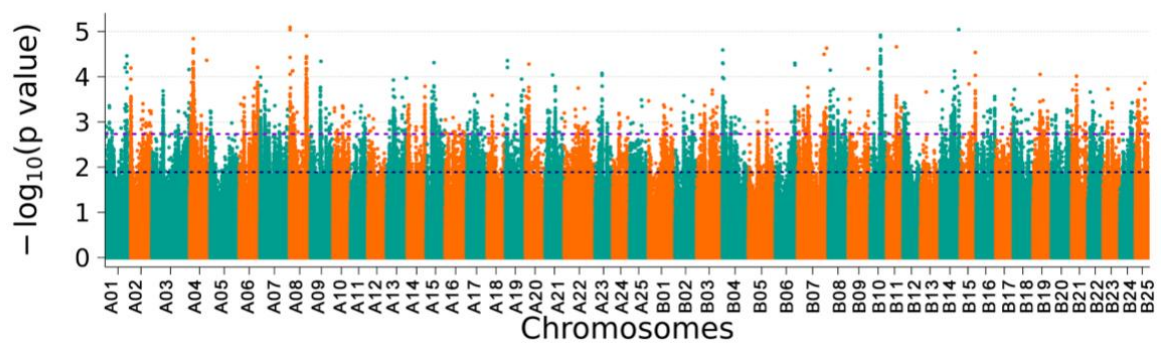

**Fig. S57.** Phenotypic variants of blue-red color in goldfish population. for GWAS. (A) Left, blue morph; right, red morph.; (B) Manhattan plot for blue-red color GWAS in goldfish population. Genes surrounding or covering peaks are indicated. The genome-wide threshold of 2.5 was defined to confirm selective sweeps by the top 1% of  $-\log_{10}(P \text{ value})$  values.

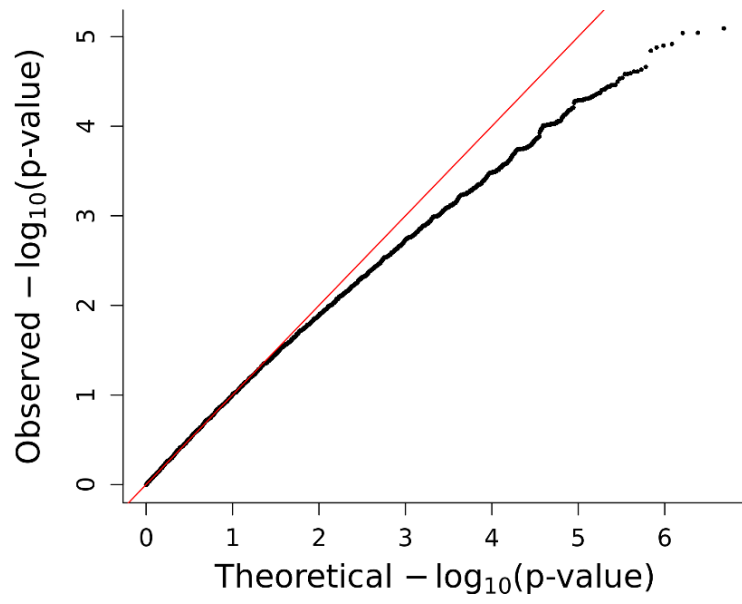

**Fig. S58.** Quantile-quantile plot for Blue-red color GWAS under a general linear model.

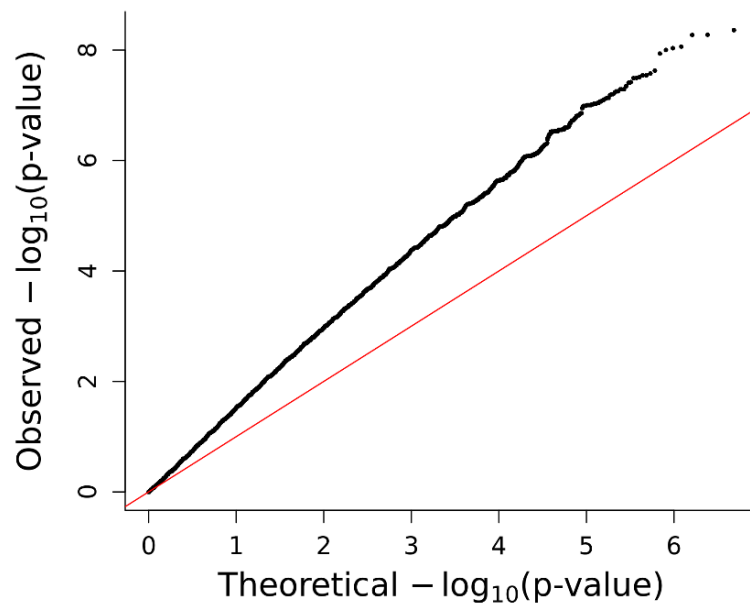

**Fig. S59.** Quantile-quantile plot for Blue-red color GWAS under a general linear model.

A

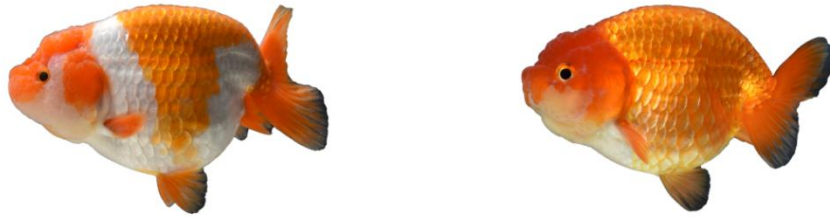

B

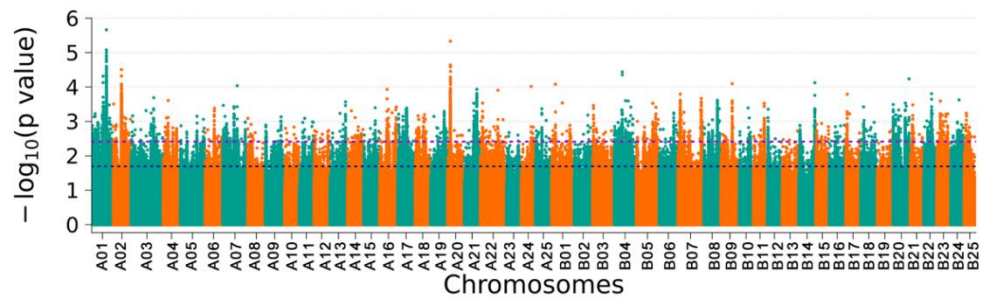

**Fig. S60.** Phenotypic variants of white-red color in goldfish population for GWAS. (A) Left, white morph.; right, red morph; (B) Manhattan plot for white-red color GWAS in goldfish population. Genes surrounding or covering peaks are indicated. The genome-wide threshold of 2.5 was defined to confirm selective sweeps by the top 1% of  $-\log_{10}(P \text{ value})$  values.

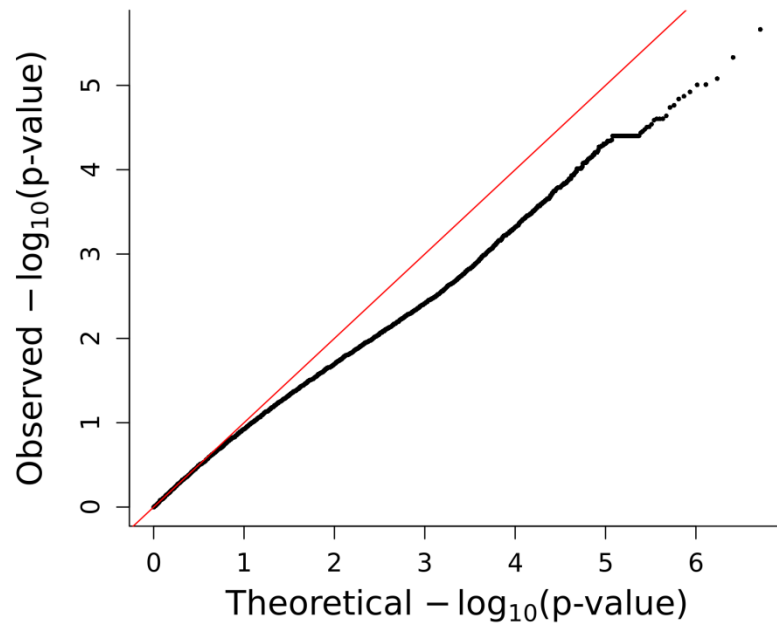

**Fig. S61.** Quantile-quantile plot for white-red color GWAS under a general linear model.

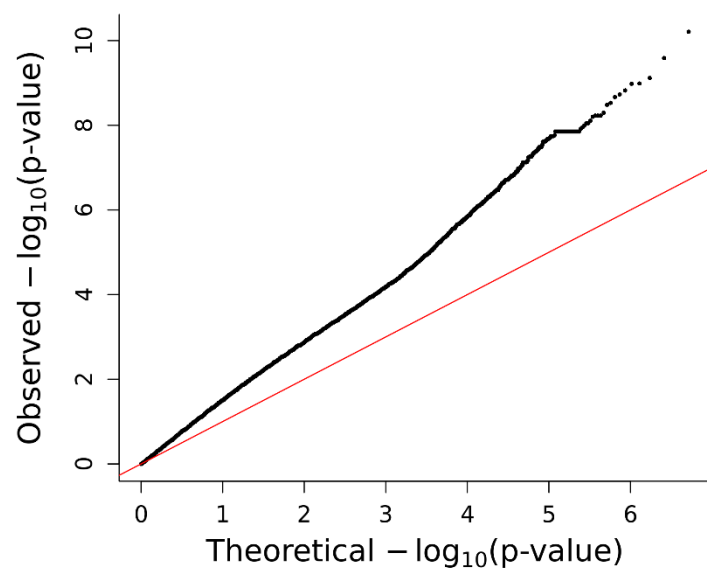

**Fig. S62.** Quantile-quantile plot for white-red color GWAS under a general linear model.



**Table S1. Statistics of sequencing reads.**

| <b>Items</b>                         | <b>Pacbio RSII</b> | <b>Pacbio corrected</b> | <b>Illumina X10</b> |
|--------------------------------------|--------------------|-------------------------|---------------------|
| Total number of reads                | 17,755,597         | 10,185,636              | 428,890,719         |
| Total number of sequenced bases (bp) | 140,278,567,820    | 65,147,393,760          | 128,667,215,700     |
| Mean reads length (bp)               | 7,900              | 6,396                   | 150                 |
| N50 (bp)                             | 12,525             | 9,262                   | 150                 |
| Coverage (X)                         | 82.5               | 38                      | 75                  |

**Table S2. Statistics of genome assembly.**

| <b>Strategy</b>          | <b>Pacbio</b> | <b>Pacbio + bionano</b> | <b>Pacbio + bionano+ Hi-C</b> |
|--------------------------|---------------|-------------------------|-------------------------------|
| Assembly size (Gbp)      | 1.73          | 1.73                    | 1.73                          |
| No. of contigs/Scaffolds | 9,448         | 5,888                   | 1,770                         |
| Maximum length (bp)      | 5,895,017     | 7,117,495               | 60,771,278                    |
| N90 (bp)                 | 86,544        | 137,868                 | 24,975,486                    |
| N80 (bp)                 | 156,812       | 234,903                 | 27,182,364                    |
| N70 (bp)                 | 241,882       | 340,368                 | 29,634,213                    |
| N60 (bp)                 | 343,934       | 456,489                 | 30,993,554                    |
| N50 (bp)                 | 474,404       | 606,731                 | 31,841,898                    |
| Average length (bp)      | 186,286       | 295,387                 | 982,856                       |

**Table S3. Summary of BioNano data collection and assembly statistics.**

|                                      | No.Molecule/genome maps | Total length (Mb) | Coverage | Molecule/map N50 (Kb) | Average molecule/Scaffold (Kb) |
|--------------------------------------|-------------------------|-------------------|----------|-----------------------|--------------------------------|
| <b>Single molecules (&gt;150 kb)</b> | 1,050,985               | 277,298           | 128      | 303                   | 286                            |
| <b>Map assembly</b>                  | 2,798                   | 2,165             | -        | 1,197                 | 774                            |

| Characteristics                | Single molecules (>150 kb) | Map assembly |
|--------------------------------|----------------------------|--------------|
| Molecules/genome maps          | 1,050,985                  | 2,798        |
| Total length (Mb)              | 277,298                    | 2,165        |
| Coverage                       | 128                        | -            |
| Molecule/map N50 (Kb)          | 303                        | 1,197        |
| Average molecule/Scaffold (Kb) | 286                        | 774          |

**Table S4. Statistics of Hi-C sequencing and mapping.**

---

| <b>Statistics of mapping</b>   |             |
|--------------------------------|-------------|
| Clean Paired-end Reads         | 525,339,654 |
| Mapped Reads                   | 443,432,105 |
| Mapped Ratio (%)               | 84.41       |
| Unique Mapped Paired-end Reads | 244,977,218 |
| Unique Mapped Ratio (%)        | 46.63       |

---

| <b>Statistics of valid reads</b> |             |
|----------------------------------|-------------|
| Unique Mapped Paired-end Reads   | 244,977,218 |
| Valid Interaction Pairs          | 65,127,696  |
| Valid Interaction Rate (%)       | 53.17       |
| Dangling End Pairs               | 42,449,018  |
| Dangling End Rate (%)            | 34.66       |
| Religation Pairs                 | 3,110,725   |
| Religation Rate (%)              | 2.54        |
| Self Circle Paired-end Reads     | 410,257     |
| Self Circle Rate (%)             | 0.33        |
| Dumped Paired-end Reads          | 11,390,913  |
| Dumped Rate (%)                  | 9.30        |

---

**Table S5. Statistics of chromosome level scaffolding base Hi-C.**

| Subgenome A/B                               | No. of genes in A/B  | No. of contigs in A/B | Total Length of A/B(bp)        | The ratio of <i>Puntius semifasciolatus</i> reads mapping against on goldfish (%) |
|---------------------------------------------|----------------------|-----------------------|--------------------------------|-----------------------------------------------------------------------------------|
| A01/B01                                     | 1,352/1,246          | 168/122               | 44,997,851/42,097,245          | 3.55/0.91                                                                         |
| A02/B02                                     | 1,217/1,236          | 140/83                | 36,707,285/34,697,925          | 3.14/0.88                                                                         |
| A03/B03                                     | 1,979/1,490          | 234/144               | 63,381,152/43,070,474          | 3.74/1.21                                                                         |
| A04/B04                                     | 977/936              | 235/101               | 45,030,301/33,333,602          | 2.62/1.38                                                                         |
| A05/B05                                     | 1,632/1,533          | 146/108               | 47,090,836/44,685,497          | 3.82/0.95                                                                         |
| A06/B06                                     | 1,080/1,071          | 117/78                | 36,347,942/33,331,409          | 3.52/0.95                                                                         |
| A07/B07                                     | 1,403/1,442          | 167/132               | 50,744,615/48,543,534          | 4.81/1.23                                                                         |
| A08/B08                                     | 1,235/1,135          | 138/100               | 33,638,161/34,220,593          | 2.98/0.93                                                                         |
| A09/B09                                     | 1,133/1,043          | 105/104               | 37,372,278/35,086,782          | 3.59/0.90                                                                         |
| A10/B10                                     | 1,023/975            | 62/84                 | 28,605,678/26,941,415          | 2.60/0.69                                                                         |
| A11/B11                                     | 803/905              | 71/83                 | 28,441,722/27,135,006          | 2.78/0.63                                                                         |
| A12/B12                                     | 988/931              | 93/84                 | 31,099,852/28,243,374          | 2.76/0.80                                                                         |
| A13/B13                                     | 985/970              | 101/81                | 33,044,272/33,691,517          | 3.57/0.85                                                                         |
| A14/B14                                     | 977/949              | 101/89                | 33,122,789/31,886,446          | 3.56/0.91                                                                         |
| A15/B15                                     | 1,025/903            | 99/79                 | 32,194,103/26,057,057          | 2.77/0.95                                                                         |
| A16/B16                                     | 1,180/1,013          | 98/96                 | 35,082,966/31,798,904          | 3.22/0.81                                                                         |
| A17/B17                                     | 1,062/987            | 81/65                 | 32,776,654/28,718,717          | 3.29/0.89                                                                         |
| A18/B18                                     | 859/909              | 111/92                | 33,617,607/33,194,216          | 3.03/0.96                                                                         |
| A19/B19                                     | 1,089/1,017          | 77/86                 | 31,871,233/30,387,218          | 2.92/0.85                                                                         |
| A20/B20                                     | 1,165/1,069          | 115/105               | 32,792,066/33,067,088          | 2.87/0.77                                                                         |
| A21/B21                                     | 1,099/873            | 97/79                 | 31,705,930/25,983,384          | 2.71/0.69                                                                         |
| A22/B22                                     | 1,305/811            | 288/88                | 53,241,296/24,947,274          | 2.54/0.74                                                                         |
| A23/B23                                     | 777/969              | 56/73                 | 28,964,060/27,799,969          | 2.81/0.89                                                                         |
| A24/B24                                     | 695/817              | 81/69                 | 25,511,874/26,957,012          | 2.73/0.71                                                                         |
| A25/B25                                     | 1,093/911            | 112/63                | 30,904,218/22,927,566          | 2.30/0.54                                                                         |
| <b>Total anchored sequences in A/B</b>      | <b>28,133/26,141</b> | <b>3093/2288</b>      | <b>918,286,741/808,803,224</b> | <b>-</b>                                                                          |
| <b>Unclustered sequences</b>                | <b>1,977(3.51%)</b>  | <b>507</b>            | <b>12,154,105</b>              | <b>-</b>                                                                          |
| <b>Total Sequences Clustered</b>            | <b>-</b>             | <b>5,381(91.50%)</b>  | <b>1,727,089,965(99.30%)</b>   | <b>-</b>                                                                          |
| <b>Total Sequences ordered and Oriented</b> | <b>-</b>             | <b>4,168(77.46%)</b>  | <b>1,653,618,961(95.75%)</b>   | <b>-</b>                                                                          |

**Table S6. Completeness of the genome based on CEGMA.**

| <b>Description</b>                     | <b>Fully mapped CEGs</b> | <b>Fully+partially mapped CEGs</b> |
|----------------------------------------|--------------------------|------------------------------------|
| Number of CEGs present in the assembly | 220                      | 246                                |
| Completeness of the genome(%)          | 88.71                    | 99.19                              |
| Average number of orthologs per CEG    | 2.43                     | 2.83                               |
| CEGs with more than one ortholog(%)    | 80.45                    | 87.40                              |

**Table S7. BUSCO analysis of genome assembly.**

| <b>Description</b>                     | <b>Number</b> | <b>Percentage(%)</b> |
|----------------------------------------|---------------|----------------------|
| <b>Complete BUSCOs</b>                 | 4,344         | 94.7                 |
| <b>Complete and single-copy BUSCOs</b> | 2,064         | 45.0                 |
| <b>Complete and duplicated BUSCOs</b>  | 2,280         | 49.7                 |
| <b>Fragmented BUSCOs</b>               | 92            | 2.0                  |
| <b>Missing BUSCOs</b>                  | 148           | 3.3                  |
| <b>Total BUSCO groups searched</b>     | 4,584         | 100                  |

**Table S8. Classification of noncoding transcripts.**

| Intergenic   |   |            |       |             |       | Genic        |     |            |     |        |     |
|--------------|---|------------|-------|-------------|-------|--------------|-----|------------|-----|--------|-----|
| Divergent    |   | Convergent |       | Same strand |       | Overlapping  |     | Containing |     | Nested |     |
| U            | D | U          | D     | U           | D     | E            | I   | E          | I   | E      | I   |
| 1,269        | 0 | 0          | 1,057 | 1,228       | 1,074 | 1,366        | 944 | 561        | 464 | 607    | 771 |
| <b>4,628</b> |   |            |       |             |       | <b>4,713</b> |     |            |     |        |     |

U, upstream; D, downstream; E, exonic; I, intronic.



**Table S9. Summary of transposable elements and repeat annotation.**

|                                 | Length(Mb) | % of Repeat | % of Genome | Genome_A | Genome_B |
|---------------------------------|------------|-------------|-------------|----------|----------|
| <b>Total Repeat Fractions</b>   | 574.83     | 100         | 33.04       | 15.97    | 14.89    |
| <b>Class I :Retrotransposon</b> | 144.93     | 25.21       | 8.33        | 3.89     | 3.86     |
| <b>LTR Retrotransposon</b>      |            |             |             |          |          |
| Ty3/Gypsy                       | 28.65      | 4.98        | 1.65        | 0.75     | 0.78     |
| Ty1/Copia                       | 0.17       | 0.03        | 0.01        | 0.01     | 0.00     |
| Other                           | 38.02      | 6.61        | 2.19        | 1.03     | 1.02     |
| <b>Non-LTR Retrotransposon</b>  |            |             |             |          |          |
| LINE                            | 68.56      | 11.93       | 3.94        | 1.85     | 1.78     |
| SINE                            | 9.53       | 1.66        | 0.55        | 0.26     | 0.26     |
| <b>Class II :DNA transposon</b> | 274.86     | 47.82       | 15.80       | 7.83     | 7.11     |
| <b>Autonomous</b>               |            |             |             |          |          |
| CACTA                           | 40.00      | 6.96        | 2.30        | 1.16     | 1.00     |
| Mutator                         | 1.84       | 0.32        | 0.11        | 0.08     | 0.03     |
| hAT                             | 56.37      | 9.81        | 3.24        | 1.59     | 1.47     |
| PIF/Harbinger                   | 10.43      | 1.81        | 0.60        | 0.29     | 0.27     |
| Tc/Mariner                      | 39.11      | 6.80        | 2.25        | 1.08     | 1.06     |
| Other                           | 116.24     | 20.22       | 6.68        | 3.35     | 3.02     |
| <b>Helitron</b>                 | 10.86      | 1.89        | 0.62        | 0.28     | 0.26     |
| <b>Tandem Repeat</b>            | 44.21      | 7.69        | 2.54        | 1.15     | 1.02     |
| <b>Unknown</b>                  | 110.83     | 19.28       | 6.37        | 3.10     | 2.90     |

**Table S10. Identification of centromeres in goldfish genome.**

| Chromosome | Length(Mb) | Position(Mb) |        | Length(b) | Chromosome | Length(Mb) | Position(Mb) |        | Length(b) |
|------------|------------|--------------|--------|-----------|------------|------------|--------------|--------|-----------|
|            |            | start        | end    |           |            |            | start        | end    |           |
| A01        | 42.439     | 37.207       | 37.210 | 2,452     | B01        | 40.237     | 31.609       | 31.675 | 66,272    |
| A02        | 34.494     | 3.003        | 3.005  | 2,037     | B02        | 33.491     | 21.872       | 21.874 | 1,836     |
| A03        | 60.771     | 48.385       | 48.679 | 294,564   | B03        | 40.822     | 6.042        | 6.047  | 5,434     |
| A04        | 41.400     | 29.351       | 29.385 | 33,842    | B04        | 32.100     | 21.605       | 21.826 | 220,890   |
| A05        | 46.420     | 29.067       | 29.067 | 1,915     | B05        | 43.227     | 10.776       | 10.778 | 2,172     |
| A06        | 34.955     | 0.844        | 0.850  | 6,037     | B06        | 32.270     | NA           | NA     | NA        |
| A07        | 49.001     | 47.798       | 47.800 | 1,690     | B07        | 47.434     | 22.938       | 22.940 | 1,560     |
| A08        | 31.842     | NA           | NA     | NA        | B08        | 33.012     | 0.300        | 0.302  | 2,074     |
| A09        | 35.860     | 15.487       | 15.489 | 2,036     | B09        | 34.473     | 32.890       | 32.092 | 3,222     |
| A10        | 27.473     | NA           | NA     | NA        | B10        | 25.974     | 11.834       | 11.836 | 1,741     |
| A11        | 27.182     | NA           | NA     | NA        | B11        | 26.910     | 24.072       | 24.074 | 2,080     |
| A12        | 29.890     | 29.117       | 29.118 | 1,959     | B12        | 27.090     | 0.812        | 0.865  | 53,545    |
| A13        | 31.410     | 3.163        | 3.165  | 1,913     | B13        | 32.776     | 2.559        | 2.563  | 4,445     |
| A14        | 31.722     | NA           | NA     | NA        | B14        | 30.071     | 1.789        | 1.790  | 1,422     |
| A15        | 29.634     | 28.306       | 28.309 | 3,630     | B15        | 24.975     | 0.157        | 0.160  | 3,602     |
| A16        | 34.058     | 31.672       | 31.677 | 4,332     | B16        | 30.899     | 12.544       | 12.546 | 2,148     |
| A17        | 32.280     | NA           | NA     | NA        | B17        | 27.735     | NA           | NA     | NA        |
| A18        | 29.442     | 17.159       | 17.160 | 1,241     | B18        | 30.994     | 30.587       | 30.988 | 401,185   |
| A19        | 31.328     | NA           | NA     | NA        | B19        | 39.306     | 27.999       | 28.002 | 2,288     |
| A20        | 31.311     | NA           | NA     | NA        | B20        | 31.926     | 28.215       | 28.216 | 1,365     |
| A21        | 29.813     | NA           | NA     | NA        | B21        | 25.228     | NA           | NA     | NA        |
| A22        | 49.504     | 23.452       | 23.454 | 2,446     | B22        | 23.971     | 23.617       | 23.624 | 6,129     |
| A23        | 27.470     | NA           | NA     | NA        | B23        | 26.326     | 9.492        | 9.494  | 1,942     |
| A24        | 24.392     | 17.289       | 17.294 | 4,703     | B24        | 26.540     | 17.239       | 17.247 | 8,619     |
| A25        | 29.951     | 7.849        | 7.856  | 5,916     | B25        | 22.386     | 19.051       | 19.291 | 239,562   |

**Table S11. Comparison of Subgenome notations in the studies of various goldfish and common carp**

| <b>Current assembly</b> | <b>Kon <i>et al.</i> 2020 (42)</b> | <b>Luo <i>et al.</i> 2020 (2)</b> | <b>Xu <i>et al.</i> 2019 (40)</b> |
|-------------------------|------------------------------------|-----------------------------------|-----------------------------------|
| Subgenome A             | Subgenome L                        | Subgenome M                       | Subgenome B                       |
| Subgenome B             | Subgenome S                        | Subgenome P                       | Subgenome A                       |

**Table S12. Assessment of genome consistency.**

| <b>Items</b>        | <b>Statistics</b> |
|---------------------|-------------------|
| Number of reads     | 442,861,726       |
| Data size (Gb)      | 66                |
| Mapped bases (Gb)   | 62                |
| Map rate (%)        | 93.59             |
| Genome Length (Mbp) | 1,739             |
| Mean Depth          | 46.4              |
| Coverage Rate (%)   | 99.01             |

**Table S13. Summary of sequenced *C. auratus* and wild *C. carp*.**

| Sample Acc. | Sample Name                        | Subpopulation* | Cluster      | Location                | Morphological characteristics |           |           |            |              |              |           |          |            |        |             |            |               |  |
|-------------|------------------------------------|----------------|--------------|-------------------------|-------------------------------|-----------|-----------|------------|--------------|--------------|-----------|----------|------------|--------|-------------|------------|---------------|--|
|             |                                    |                |              |                         | Body                          | TwinTails | DorsalFin | CaudalFin  | TelescopeEye | CelestialEye | BubbleEye | HumpBack | Hood       | Pompon | Scale       | Pearlscale | Coloration    |  |
| GF001       | red white matt crown-pearlscale    | WG             | Wenyu-Oranda | Jiangsu province, China | ShortEgg                      | Twing     | Present   | Normal     | Normal       | Normal       | Normal    | Normal   | Hooded     | None   | Transparent | Pearlscale | NA            |  |
| GF002       | black telescope                    | WG             | Telescope    | Jiangsu province, China | ShortEgg                      | Twing     | Present   | Normal     | TelescopeEye | NA           | NA        | Normal   | Non-hooded | None   | Normal      | Normal     | black         |  |
| GF003       | black telescope                    | WG             | Telescope    | Jiangsu province, China | ShortEgg                      | Twing     | Present   | Normal     | TelescopeEye | NA           | NA        | Normal   | Non-hooded | None   | Normal      | Normal     | black         |  |
| GF004       | black telescope                    | WG             | Telescope    | Jiangsu province, China | ShortEgg                      | Twing     | Present   | Normal     | TelescopeEye | NA           | NA        | Normal   | Non-hooded | None   | Normal      | Normal     | black         |  |
| GF005       | chocolate broad-tail ryukin        | WG             | Wenyu-Oranda | Jiangsu province, China | ShortEgg                      | Twing     | Present   | broad-tail | Normal       | Normal       | Normal    | HumpBack | Non-hooded | None   | Normal      | Normal     | chocolate     |  |
| GF006       | blue chocolate long-tail telescope | WG             | Telescope    | Jiangsu province, China | ShortEgg                      | Twing     | Present   | long-tail  | TelescopeEye | NA           | NA        | Normal   | Non-hooded | None   | Normal      | Normal     | bluechocolate |  |
| GF007       | calico pearlscale                  | WG             | Wenyu-Oranda | Jiangsu province, China | ShortEgg                      | Twing     | Present   | Normal     | Normal       | Normal       | Normal    | Normal   | Non-hooded | None   | Transparent | Pearlscale | NA            |  |
| GF008       | red white matt crown-pearlscale    | WG             | Wenyu-Oranda | Jiangsu province, China | ShortEgg                      | Twing     | Present   | Normal     | Normal       | Normal       | Normal    | Normal   | Hooded     | None   | Transparent | Pearlscale | NA            |  |
| GF009       | chocolate pearlscale               | WG             | Wenyu-Oranda | Jiangsu province, China | ShortEgg                      | Twing     | Present   | Normal     | Normal       | Normal       | Normal    | Normal   | Non-hooded | None   | Normal      | Pearlscale | NA            |  |
| GF010       | broad-tail redcap-oranda           | WG             | Wenyu-Oranda | Jiangsu province, China | ShortEgg                      | Twing     | Present   | broad-tail | Normal       | Normal       | Normal    | Normal   | Hooded     | None   | Normal      | Normal     | white         |  |
| GF011       | red white broad-tail ryukin        | WG             | Wenyu-Oranda | Jiangsu province, China | ShortEgg                      | Twing     | Present   | broad-tail | Normal       | Normal       | Normal    | HumpBack | Non-hooded | None   | Normal      | Normal     | redwhite      |  |
| GF012       | calico short-tail egg-pompon       | EG             | Egg-pompon   | Jiangsu province, China | ShortEgg                      | Twing     | Absent    | short-tail | Normal       | Normal       | Normal    | Normal   | Non-hooded | Pompon | Transparent | Normal     | NA            |  |
| GF013       | calico short-tail egg-pompon       | EG             | Egg-pompon   | Jiangsu province, China | ShortEgg                      | Twing     | Absent    | short-tail | Normal       | Normal       | Normal    | Normal   | Non-hooded | Pompon | Transparent | Normal     | NA            |  |
| GF014       | calico short-tail egg-pompon       | EG             | Egg-pompon   | Jiangsu province, China | ShortEgg                      | Twing     | Absent    | short-tail | Normal       | Normal       | Normal    | Normal   | Non-hooded | Pompon | Transparent | Normal     | NA            |  |
| GF015       | chocolate celestial                | EG             | Egg-pompon   | Jiangsu province, China | ShortEgg                      | Twing     | Absent    | Normal     | NA           | CelestialEye | NA        | Normal   | Non-hooded | None   | Normal      | Normal     | chocolate     |  |

|       |                                    |    |                  |                         |           |        |         |                |               |        |            |        |            |      |             |            |           |
|-------|------------------------------------|----|------------------|-------------------------|-----------|--------|---------|----------------|---------------|--------|------------|--------|------------|------|-------------|------------|-----------|
| GF016 | single-tail calico oranda          | WG | Wenyu-Oranda     | Jiangsu province, China | ShortEg g | NA     | Present | single-tail    | Normal        | Normal | Normal     | Normal | Hooded     | None | Transparent | Normal     | NA        |
| GF017 | red egg-pheonix                    | EG | Eggfish-Lionhead | Jiangsu province, China | ShortEg g | Twin g | Absent  | Phoenix Tail   | Normal        | Normal | Normal     | Normal | Non-hooded | None | Normal      | Normal     | red       |
| GF018 | red white egg-pheonix              | EG | Eggfish-Lionhead | Jiangsu province, China | ShortEg g | Twin g | Absent  | Phoenix Tail   | Normal        | Normal | Normal     | Normal | Non-hooded | None | Normal      | Normal     | redwhite  |
| GF019 | blue white bubble-eye              | EG | Eggfish-Lionhead | Jiangsu province, China | ShortEg g | Twin g | Absent  | Normal         | NA            | NA     | BubbleEy e | Normal | Non-hooded | None | Normal      | Normal     | bluewhite |
| GF020 | blue bubble-eye                    | EG | Eggfish-Lionhead | Jiangsu province, China | ShortEg g | Twin g | Absent  | Normal         | NA            | NA     | BubbleEy e | Normal | Non-hooded | None | Normal      | Normal     | blue      |
| GF021 | calico bubble-eye                  | EG | Eggfish-Lionhead | Jiangsu province, China | ShortEg g | Twin g | Absent  | Normal         | NA            | NA     | BubbleEy e | Normal | Non-hooded | None | Transparent | Normal     | NA        |
| GF022 | calico bubble-eye                  | EG | Eggfish-Lionhead | Jiangsu province, China | ShortEg g | Twin g | Absent  | Normal         | NA            | NA     | BubbleEy e | Normal | Non-hooded | None | Transparent | Normal     | NA        |
| GF023 | black bubble-eye                   | EG | Eggfish-Lionhead | Jiangsu province, China | ShortEg g | Twin g | Absent  | Normal         | NA            | NA     | BubbleEy e | Normal | Non-hooded | None | Normal      | Normal     | black     |
| GF024 | black bubble-eye                   | EG | Eggfish-Lionhead | Jiangsu province, China | ShortEg g | Twin g | Absent  | Normal         | NA            | NA     | BubbleEy e | Normal | Non-hooded | None | Normal      | Normal     | NA        |
| GF025 | blue long-tail telescope           | WG | Telescope        | Jiangsu province, China | ShortEg g | Twin g | Present | long-tail      | TelescopeEy e | NA     | NA         | Normal | Non-hooded | None | Normal      | Normal     | blue      |
| GF026 | calico pearlscale                  | WG | Wenyu-Oranda     | Jiangsu province, China | ShortEg g | Twin g | Present | Normal         | Normal        | Normal | Normal     | Normal | Non-hooded | None | Transparent | Pearlscale | NA        |
| GF027 | red chinese-ranchu                 | EG | Chinese-ranchu   | Jiangsu province, China | ShortEg g | Twin g | Absent  | Normal         | Normal        | Normal | Normal     | Normal | Hooded     | None | Normal      | Normal     | red       |
| GF028 | black red chinese-ranchu           | EG | Chinese-ranchu   | Jiangsu province, China | ShortEg g | Twin g | Absent  | Normal         | Normal        | Normal | Normal     | Normal | Hooded     | None | Normal      | Normal     | blackred  |
| GF029 | black chinese-ranchu               | EG | Chinese-ranchu   | Jiangsu province, China | ShortEg g | Twin g | Absent  | Normal         | Normal        | Normal | Normal     | Normal | Hooded     | None | Normal      | Normal     | black     |
| GF030 | blue chinese-ranchu                | EG | Chinese-ranchu   | Jiangsu province, China | ShortEg g | Twin g | Absent  | Normal         | Normal        | Normal | Normal     | Normal | Hooded     | None | Normal      | Normal     | blue      |
| GF031 | white chinese-ranchu               | EG | Chinese-ranchu   | Jiangsu province, China | ShortEg g | Twin g | Absent  | Normal         | Normal        | Normal | Normal     | Normal | Hooded     | None | Normal      | Normal     | white     |
| GF032 | red white chinese-ranchu           | EG | Chinese-ranchu   | Jiangsu province, China | ShortEg g | Twin g | Absent  | Normal         | Normal        | Normal | Normal     | Normal | Hooded     | None | Normal      | Normal     | redwhite  |
| GF033 | black butterfly-tail telescope     | WG | Telescope        | Jiangsu province, China | ShortEg g | Twin g | Present | butterfly-tail | TelescopeEy e | NA     | NA         | Normal | Non-hooded | None | NA          | Normal     | NA        |
| GF034 | black red butterfly-tail telescope | WG | Telescope        | Jiangsu province, China | ShortEg g | Twin g | Present | butterfly-tail | TelescopeEy e | NA     | NA         | Normal | Non-hooded | None | Normal      | Normal     | blackred  |

|       |                                     |    |                |                                |                |         |                |                |        |        |            |        |            |            |           |
|-------|-------------------------------------|----|----------------|--------------------------------|----------------|---------|----------------|----------------|--------|--------|------------|--------|------------|------------|-----------|
| GF035 | red white butterfly-tail telescope  | WG | Telescope      | Jiangsu province, China        | ShortEg Twin g | Present | butterfly-tail | TelescopeEy NA | NA     | Normal | Non-hooded | None   | Normal     | Normal     | redwhite  |
| GF036 | red butterfly-tail telescope        | WG | Telescope      | Jiangsu province, China        | ShortEg Twin g | Present | butterfly-tail | TelescopeEy NA | NA     | Normal | Non-hooded | None   | Normal     | Normal     | red       |
| GF037 | chocolate butterfly-tail telescope  | WG | Telescope      | Jiangsu province, China        | ShortEg Twin g | Present | butterfly-tail | TelescopeEy NA | NA     | Normal | Non-hooded | None   | Normal     | Normal     | chocolate |
| GF038 | blue butterfly-tail telescope       | WG | Telescope      | Jiangsu province, China        | ShortEg Twin g | Present | butterfly-tail | TelescopeEy NA | NA     | Normal | Non-hooded | None   | Normal     | Normal     | blue      |
| GF039 | calico butterfly-tail telescope     | WG | Telescope      | Jiangsu province, China        | ShortEg Twin g | Present | butterfly-tail | TelescopeEy NA | NA     | Normal | Non-hooded | None   | Transparen | Normal     | NA        |
| GF040 | white butterfly-tail telescope      | WG | Telescope      | Jiangsu province, China        | ShortEg Twin g | Present | butterfly-tail | TelescopeEy NA | NA     | Normal | Non-hooded | None   | Normal     | Normal     | white     |
| GF041 | calico butterfly-tail telescope     | WG | Telescope      | Jiangsu province, China        | ShortEg Twin g | Present | butterfly-tail | TelescopeEy NA | NA     | Normal | Non-hooded | None   | Transparen | Normal     | NA        |
| GF042 | black red butterfly-tail telescope  | WG | Telescope      | Jiangsu province, China        | ShortEg Twin g | Present | butterfly-tail | TelescopeEy NA | NA     | Normal | Non-hooded | None   | Normal     | Normal     | blackred  |
| GF043 | calico chinese-ranchu               | EG | Chinese-ranchu | Jiangsu province, China        | ShortEg Twin g | Absent  | Normal         | Normal         | Normal | Normal | Hooded     | None   | Transparen | Normal     | NA        |
| GF044 | red white matt crown-pearlscale     | WG | Wenyu-Oranda   | Jiangsu province, China        | ShortEg Twin g | Present | Normal         | Normal         | Normal | Normal | Hooded     | None   | Transparen | Pearlscale | NA        |
| GF045 | red white matt long-tail pearlscale | WG | Wenyu-Oranda   | Jiangsu province, China        | ShortEg Twin g | Present | long-tail      | Normal         | Normal | Normal | Non-hooded | None   | Transparen | Pearlscale | NA        |
| GF046 | black pompon-telescope-oranda       | WG | Wen-pompon     | Fuzhou, Fujian province, China | ShortEg Twin g | Present | Normal         | TelescopeEy NA | NA     | Normal | Hooded     | Pompon | Normal     | Normal     | black     |
| GF047 | black pompon-telescope-oranda       | WG | Wen-pompon     | Fuzhou, Fujian province, China | ShortEg Twin g | Present | Normal         | TelescopeEy NA | NA     | Normal | Hooded     | Pompon | Normal     | Normal     | black     |
| GF048 | black pompon-                       | WG | Wen-pompon     | Fuzhou, Fujian province, China | ShortEg Twin g | Present | Normal         | TelescopeEy NA | NA     | Normal | Hooded     | Pompon | Normal     | Normal     | black     |

|       |                                            |    |                |                                |                |         |        |                |        |        |        |        |              |        |               |
|-------|--------------------------------------------|----|----------------|--------------------------------|----------------|---------|--------|----------------|--------|--------|--------|--------|--------------|--------|---------------|
| GF049 | telescope-oranda<br>black telescope-oranda | WG | Telescope      | Fuzhou, Fujian province, China | ShortEg Twin g | Present | Normal | TelescopeEy NA | NA     | Normal | NA     | None   | Normal       | Normal | black         |
| GF050 | black pompon-telescope-oranda              | WG | Wen-pompon     | Fuzhou, Fujian province, China | ShortEg Twin g | Present | Normal | TelescopeEy NA | NA     | Normal | Hooded | Pompon | Normal       | Normal | black         |
| GF051 | chocolate pompon-telescope-oranda          | WG | Wen-pompon     | Fuzhou, Fujian province, China | ShortEg Twin g | Present | Normal | TelescopeEy NA | NA     | Normal | Hooded | Pompon | Normal       | Normal | chocolate     |
| GF052 | chocolate pompon-telescope-oranda          | WG | Wen-pompon     | Fuzhou, Fujian province, China | ShortEg Twin g | Present | Normal | TelescopeEy NA | NA     | Normal | Hooded | Pompon | Normal       | Normal | chocolate     |
| GF053 | black red pompon-telescope-oranda          | WG | Wen-pompon     | Fuzhou, Fujian province, China | ShortEg Twin g | Present | Normal | TelescopeEy NA | NA     | Normal | Hooded | Pompon | Normal       | Normal | blackred      |
| GF054 | red white matt telescope-oranda            | WG | Telescope      | Fuzhou, Fujian province, China | ShortEg Twin g | Present | Normal | TelescopeEy NA | NA     | Normal | NA     | None   | Transparen t | Normal | NA            |
| GF055 | red white matt telescope-oranda            | WG | Telescope      | Fuzhou, Fujian province, China | ShortEg Twin g | Present | Normal | TelescopeEy NA | NA     | Normal | NA     | None   | Transparen t | Normal | NA            |
| GF056 | white pompon-telescope-oranda              | WG | Wen-pompon     | Fuzhou, Fujian province, China | ShortEg Twin g | Present | Normal | TelescopeEy NA | NA     | Normal | Hooded | Pompon | Normal       | Normal | white         |
| GF057 | red white matt telescope-oranda            | WG | Telescope      | Fuzhou, Fujian province, China | ShortEg Twin g | Present | Normal | TelescopeEy NA | NA     | Normal | NA     | None   | Transparen t | Normal | NA            |
| GF058 | blue chocolate chinese-ranchu              | EG | Chinese-ranchu | Fuzhou, Fujian province, China | ShortEg Twin g | Absent  | Normal | Normal         | Normal | Normal | Hooded | None   | Normal       | Normal | bluechocolate |
| GF059 | lilac chinese-ranchu                       | EG | Chinese-ranchu | Fuzhou, Fujian province, China | ShortEg Twin g | Absent  | Normal | Normal         | Normal | Normal | Hooded | None   | Normal       | Normal | lilac         |
| GF060 | chocolate chinese-ranchu                   | EG | Chinese-ranchu | Fuzhou, Fujian province, China | ShortEg Twin g | Absent  | Normal | Normal         | Normal | Normal | Hooded | None   | Normal       | Normal | chocolate     |
| GF061 | black red chinese-ranchu                   | EG | Chinese-ranchu | Fuzhou, Fujian province, China | ShortEg Twin g | Absent  | Normal | Normal         | Normal | Normal | Hooded | None   | Normal       | Normal | blackred      |
| GF062 | white chinese-ranchu                       | EG | Chinese-ranchu | Fuzhou, Fujian province, China | ShortEg Twin g | Absent  | Normal | Normal         | Normal | Normal | Hooded | None   | Normal       | Normal | white         |



|       |                                      |    |                |                                |                |         |            |        |               |        |        |            |        |              |        |           |
|-------|--------------------------------------|----|----------------|--------------------------------|----------------|---------|------------|--------|---------------|--------|--------|------------|--------|--------------|--------|-----------|
| GF063 | calico chinese-ranchu                | EG | Chinese-ranchu | Fuzhou, Fujian province, China | ShortEg Twin g | Absent  | Normal     | Normal | Normal        | Normal | Normal | Hooded     | None   | Transparen t | Normal | NA        |
| GF064 | calico chinese-ranchu                | EG | Chinese-ranchu | Fuzhou, Fujian province, China | ShortEg Twin g | Absent  | Normal     | Normal | Normal        | Normal | Normal | Hooded     | None   | Transparen t | Normal | NA        |
| GF065 | black chinese-ranchu                 | EG | Chinese-ranchu | Fuzhou, Fujian province, China | ShortEg Twin g | Absent  | Normal     | Normal | Normal        | Normal | Normal | Hooded     | None   | Normal       | Normal | black     |
| GF066 | black red chinese-ranchu             | EG | Chinese-ranchu | Fuzhou, Fujian province, China | ShortEg Twin g | Absent  | Normal     | Normal | Normal        | Normal | Normal | Hooded     | None   | Normal       | Normal | blackred  |
| GF067 | red white short-tail oranda          | WG | Wenyu-Oranda   | Fuzhou, Fujian province, China | ShortEg Twin g | Present | short-tail | Normal | Normal        | Normal | Normal | Hooded     | None   | Normal       | Normal | redwhite  |
| GF068 | red white pompon-oranda              | WG | Wen-pompon     | Fuzhou, Fujian province, China | ShortEg Twin g | Present | Normal     | Normal | Normal        | Normal | Normal | Hooded     | Pompon | Normal       | Normal | redwhite  |
| GF069 | black pompon-oranda                  | WG | Wen-pompon     | Fuzhou, Fujian province, China | ShortEg Twin g | Present | Normal     | Normal | Normal        | Normal | Normal | Hooded     | Pompon | Normal       | Normal | NA        |
| GF070 | red white pompon-oranda              | WG | Wen-pompon     | Fuzhou, Fujian province, China | ShortEg Twin g | Present | Normal     | Normal | Normal        | Normal | Normal | Hooded     | Pompon | Normal       | Normal | redwhite  |
| GF071 | chocolate oranda                     | WG | Wenyu-Oranda   | Fuzhou, Fujian province, China | ShortEg Twin g | Present | Normal     | Normal | Normal        | Normal | Normal | Hooded     | None   | Normal       | Normal | chocolate |
| GF072 | black red long-tail pompon-celestial | EG | Egg-pompon     | Fuzhou, Fujian province, China | ShortEg Twin g | Absent  | long-tail  | NA     | CelestialEy e | NA     | Normal | Non-hooded | Pompon | Normal       | Normal | blackred  |
| GF073 | red long-tail pompon-celestial       | EG | Egg-pompon     | Fuzhou, Fujian province, China | ShortEg Twin g | Absent  | long-tail  | NA     | CelestialEy e | NA     | Normal | Non-hooded | Pompon | Normal       | Normal | red       |
| GF074 | red white pompon-celestial           | EG | Egg-pompon     | Fuzhou, Fujian province, China | ShortEg Twin g | Absent  | Normal     | NA     | CelestialEy e | NA     | Normal | Non-hooded | Pompon | Normal       | Normal | redwhite  |
| GF075 | red short-tail egg-pompon            | EG | Egg-pompon     | Fuzhou, Fujian province, China | ShortEg Twin g | Absent  | short-tail | Normal | Normal        | Normal | Normal | Non-hooded | Pompon | Normal       | Normal | red       |
| GF076 | lilac chinese-ranchu                 | EG | Chinese-ranchu | Fuzhou, Fujian province, China | ShortEg Twin g | Absent  | Normal     | Normal | Normal        | Normal | Normal | Hooded     | None   | Normal       | Normal | lilac     |
| GF077 | chinese-ranchu                       | EG | Chinese-ranchu | Fuzhou, Fujian province, China | ShortEg Twin g | Absent  | Normal     | Normal | Normal        | Normal | Normal | NA         | None   | Transparen t | Normal | NA        |
| GF078 | red long-tail pompon-lionhead        | EG | Egg-pompon     | Fuzhou, Fujian province, China | ShortEg Twin g | Absent  | long-tail  | Normal | Normal        | Normal | Normal | NA         | Pompon | Normal       | Normal | red       |
| GF079 | red matt long-tail chinese-ranchu    | EG | Chinese-ranchu | Fuzhou, Fujian province, China | ShortEg Twin g | Absent  | long-tail  | Normal | Normal        | Normal | Normal | Hooded     | None   | Transparen t | Normal | NA        |

|       |                                           |    |                  |                                |                |         |                |        |        |        |        |        |            |        |             |            |           |
|-------|-------------------------------------------|----|------------------|--------------------------------|----------------|---------|----------------|--------|--------|--------|--------|--------|------------|--------|-------------|------------|-----------|
| GF080 | black short-tail wen-pompon               | WG | Wen-pompon       | Fuzhou, Fujian province, China | ShortEg Twin g | Present | short-tail     | Normal | Normal | Normal | Normal | Normal | Non-hooded | Pompon | Normal      | Normal     | NA        |
| GF081 | black red pompon-oranda                   | WG | Wen-pompon       | Fuzhou, Fujian province, China | ShortEg Twin g | Present | Normal         | Normal | Normal | Normal | Normal | Normal | Hooded     | Pompon | Normal      | Normal     | NA        |
| GF082 | red cat-lionhead                          | EG | Eggfish-Lionhead | Anhui province, China          | ShortEg Twin g | Absent  | Normal         | Normal | Normal | Normal | Normal | Normal | Hooded     | None   | Normal      | Normal     | red       |
| GF083 | black red cat-lionhead                    | EG | Eggfish-Lionhead | Anhui province, China          | ShortEg Twin g | Absent  | Normal         | Normal | Normal | Normal | Normal | Normal | Hooded     | None   | Normal      | Normal     | blackred  |
| GF084 | black red pearlscale                      | WG | Wenyu-Oranda     | Anhui province, China          | ShortEg Twin g | Present | Normal         | Normal | Normal | Normal | Normal | Normal | Non-hooded | None   | Normal      | Pearlscale | blackred  |
| GF085 | red white pearlscale                      | WG | Wenyu-Oranda     | Anhui province, China          | ShortEg Twin g | Present | Normal         | Normal | Normal | Normal | Normal | Normal | Non-hooded | None   | Normal      | Pearlscale | redwhite  |
| GF086 | oranda                                    | WG | Wenyu-Oranda     | Fuzhou, Fujian province, China | ShortEg Twin g | Present | Normal         | Normal | Normal | Normal | Normal | Normal | Hooded     | None   | Normal      | Normal     | NA        |
| GF087 | wen-butterflytail                         | WG | Wenyu-Oranda     | Fuzhou, Fujian province, China | ShortEg Twin g | Present | Butterfly Tail | Normal | Normal | Normal | Normal | Normal | NA         | None   | NA          | Normal     | NA        |
| GF088 | chocolate wen-butterflytail               | WG | Wenyu-Oranda     | Fuzhou, Fujian province, China | ShortEg Twin g | Present | Butterfly Tail | Normal | Normal | Normal | Normal | Normal | Non-hooded | None   | Normal      | Normal     | chocolate |
| GF089 | black short-tail oranda                   | WG | Wenyu-Oranda     | Fuzhou, Fujian province, China | ShortEg Twin g | Present | short-tail     | Normal | Normal | Normal | Normal | Normal | Hooded     | None   | Normal      | Normal     | black     |
| GF090 | red chinese-ranchu                        | EG | Chinese-ranchu   | Fuzhou, Fujian province, China | ShortEg Twin g | Absent  | Normal         | Normal | Normal | Normal | Normal | Normal | Hooded     | None   | Normal      | Normal     | red       |
| GF091 | white chinese-ranchu                      | EG | Chinese-ranchu   | Fuzhou, Fujian province, China | ShortEg Twin g | Absent  | Normal         | Normal | Normal | Normal | Normal | Normal | Hooded     | None   | Normal      | Normal     | white     |
| GF092 | red white matt long-tail shouxin-lionhead | EG | Eggfish-Lionhead | Fuzhou, Fujian province, China | ShortEg Twin g | Absent  | long-tail      | Normal | Normal | Normal | Normal | Normal | NA         | None   | Transparent | Normal     | NA        |
| GF093 | red white chinese-ranchu                  | EG | Chinese-ranchu   | Fuzhou, Fujian province, China | ShortEg Twin g | Absent  | Normal         | Normal | Normal | Normal | Normal | Normal | Hooded     | None   | Normal      | Normal     | redwhite  |
| GF094 | black short-tail oranda                   | WG | Wenyu-Oranda     | Fuzhou, Fujian province, China | ShortEg Twin g | Present | short-tail     | Normal | Normal | Normal | Normal | Normal | Hooded     | None   | Normal      | Normal     | black     |
| GF095 | calico short-tail oranda                  | WG | Wenyu-Oranda     | Fuzhou, Fujian province, China | ShortEg Twin g | Present | short-tail     | Normal | Normal | Normal | Normal | Normal | Hooded     | None   | Transparent | Normal     | NA        |
| GF096 | black chinese-ranchu                      | EG | Chinese-ranchu   | Fuzhou, Fujian province, China | ShortEg Twin g | Absent  | Normal         | Normal | Normal | Normal | Normal | Normal | Hooded     | None   | Normal      | Normal     | black     |

|       |                                         |    |                  |                                |                |         |            |               |               |        |           |            |        |              |        |          |
|-------|-----------------------------------------|----|------------------|--------------------------------|----------------|---------|------------|---------------|---------------|--------|-----------|------------|--------|--------------|--------|----------|
| GF097 | calico short-tail oranda                | WG | Wenyu-Oranda     | Fuzhou, Fujian province, China | ShortEg Twin g | Present | short-tail | Normal        | Normal        | Normal | Normal    | Hooded     | None   | Transparen t | Normal | NA       |
| GF098 | calico broad-tail ryukin                | WG | Wenyu-Oranda     | Fuzhou, Fujian province, China | ShortEg Twin g | Present | broad-tail | Normal        | Normal        | Normal | HumpBac k | Non-hooded | None   | Transparen t | Normal | NA       |
| GF099 | red white telescope                     | WG | Telescope        | Fuzhou, Fujian province, China | ShortEg Twin g | Present | Normal     | TelescopeEy e | NA            | NA     | Normal    | Non-hooded | None   | Normal       | Normal | redwhite |
| GF100 | calico short-tail oranda                | WG | Wenyu-Oranda     | Fuzhou, Fujian province, China | ShortEg Twin g | Present | short-tail | Normal        | Normal        | Normal | Normal    | Hooded     | None   | Transparen t | Normal | NA       |
| GF101 | red white chinese-ranchu                | EG | Chinese-ranchu   | Fuzhou, Fujian province, China | ShortEg Twin g | Absent  | Normal     | Normal        | Normal        | Normal | Normal    | Hooded     | None   | Normal       | Normal | redwhite |
| GF102 | red oranda                              | WG | Wenyu-Oranda     | Fuzhou, Fujian province, China | ShortEg Twin g | Present | Normal     | Normal        | Normal        | Normal | Normal    | Hooded     | None   | Normal       | Normal | red      |
| GF103 | black chinese-ranchu                    | EG | Chinese-ranchu   | Fuzhou, Fujian province, China | ShortEg Twin g | Absent  | Normal     | Normal        | Normal        | Normal | Normal    | Hooded     | None   | Normal       | Normal | black    |
| GF104 | red egg-pompon                          | EG | Egg-pompon       | Fuzhou, Fujian province, China | ShortEg Twin g | Absent  | Normal     | Normal        | Normal        | Normal | Normal    | Non-hooded | Pompon | Normal       | Normal | red      |
| GF105 | red white matt long-tail chinese-ranchu | EG | Chinese-ranchu   | Fuzhou, Fujian province, China | ShortEg Twin g | Absent  | long-tail  | Normal        | Normal        | Normal | Normal    | Hooded     | None   | Transparen t | Normal | NA       |
| GF106 | red long-tail highhead-oranda           | WG | Wenyu-Oranda     | Fuzhou, Fujian province, China | ShortEg Twin g | Present | long-tail  | Normal        | Normal        | Normal | Normal    | Hooded     | None   | Normal       | Normal | red      |
| GF107 | red broad-tail shouxin-lionhead         | EG | Eggfish-Lionhead | Fuzhou, Fujian province, China | ShortEg Twin g | Absent  | broad-tail | Normal        | Normal        | Normal | Normal    | Hooded     | None   | Normal       | Normal | red      |
| GF108 | red pompon-celestial                    | EG | Egg-pompon       | Fuzhou, Fujian province, China | ShortEg Twin g | Absent  | Normal     | NA            | CelestialEy e | NA     | Normal    | Non-hooded | Pompon | Normal       | Normal | red      |
| GF109 | black red broad-tail shouxin-lionhead   | EG | Eggfish-Lionhead | Fuzhou, Fujian province, China | ShortEg Twin g | Absent  | broad-tail | Normal        | Normal        | Normal | Normal    | NA         | None   | Normal       | Normal | blackred |
| GF110 | redcap-oranda                           | WG | Wenyu-Oranda     | Fuzhou, Fujian province, China | ShortEg Twin g | Present | Normal     | Normal        | Normal        | Normal | Normal    | Hooded     | None   | Normal       | Normal | redwhite |
| GF111 | red dorsalfin-ranchu                    | EG | Chinese-ranchu   | Fuzhou, Fujian province, China | ShortEg Twin g | NA      | Normal     | Normal        | Normal        | Normal | Normal    | Hooded     | None   | Normal       | Normal | NA       |
| GF112 | white chinese-ranchu                    | EG | Chinese-ranchu   | Fuzhou, Fujian province, China | ShortEg Twin g | Absent  | Normal     | Normal        | Normal        | Normal | Normal    | Hooded     | None   | Normal       | Normal | white    |
| GF113 | red white matt chinese-ranchu           | EG | Chinese-ranchu   | Fuzhou, Fujian province, China | ShortEg Twin g | Absent  | Normal     | Normal        | Normal        | Normal | Normal    | Hooded     | None   | Transparen t | Normal | NA       |

|       |                                 |    |                  |                                |                |         |                |               |        |        |        |        |            |        |              |        |           |
|-------|---------------------------------|----|------------------|--------------------------------|----------------|---------|----------------|---------------|--------|--------|--------|--------|------------|--------|--------------|--------|-----------|
| GF114 | red shouxin-lionhead            | EG | Eggfish-Lionhead | Fuzhou, Fujian province, China | ShortEg Twin g | Absent  | Normal         | Normal        | Normal | Normal | Normal | Normal | NA         | None   | Normal       | Normal | red       |
| GF115 | chinese-ranchu                  | EG | Chinese-ranchu   | Fuzhou, Fujian province, China | ShortEg Twin g | Absent  | Normal         | Normal        | Normal | Normal | Normal | Normal | Hooded     | None   | NA           | Normal | NA        |
| GF116 | red chinese-ranchu              | EG | Chinese-ranchu   | Fuzhou, Fujian province, China | ShortEg Twin g | Absent  | Normal         | Normal        | Normal | Normal | Normal | Normal | Hooded     | None   | Normal       | Normal | red       |
| GF117 | red white matt chinese-ranchu   | EG | Chinese-ranchu   | Fuzhou, Fujian province, China | ShortEg Twin g | Absent  | Normal         | Normal        | Normal | Normal | Normal | Normal | Hooded     | None   | Transparen t | Normal | NA        |
| GF118 | red long-tail pompon-oranda     | WG | Wen-pompon       | Fuzhou, Fujian province, China | ShortEg Twin g | Present | long-tail      | Normal        | Normal | Normal | Normal | Normal | Hooded     | Pompon | Normal       | Normal | red       |
| GF119 | white butterfly-tail telescope  | WG | Telescope        | Fuzhou, Fujian province, China | ShortEg Twin g | Present | butterfly-tail | TelescopeEy e | NA     | NA     | Normal | Normal | Non-hooded | None   | Normal       | Normal | white     |
| GF120 | blue long-tail oranda           | WG | Wenyu-Oranda     | Fuzhou, Fujian province, China | ShortEg Twin g | Present | long-tail      | Normal        | Normal | Normal | Normal | Normal | Hooded     | None   | Normal       | Normal | blue      |
| GF121 | calico chinese-ranchu           | EG | Chinese-ranchu   | Fuzhou, Fujian province, China | ShortEg Twin g | Absent  | Normal         | Normal        | Normal | Normal | Normal | Normal | Hooded     | None   | Transparen t | Normal | NA        |
| GF122 | red long-tail shouxin-lionhead  | EG | Eggfish-Lionhead | Fuzhou, Fujian province, China | ShortEg Twin g | Absent  | long-tail      | Normal        | Normal | Normal | Normal | Normal | NA         | None   | Normal       | Normal | red       |
| GF123 | chocolate chinese-ranchu        | EG | Chinese-ranchu   | Fuzhou, Fujian province, China | ShortEg Twin g | Absent  | Normal         | Normal        | Normal | Normal | Normal | Normal | Hooded     | None   | Normal       | Normal | chocolate |
| GF124 | black butterfly-tail telescope  | WG | Telescope        | Fuzhou, Fujian province, China | ShortEg Twin g | Present | butterfly-tail | TelescopeEy e | NA     | NA     | Normal | Normal | Non-hooded | None   | Normal       | Normal | black     |
| GF125 | calico chinese-ranchu           | EG | Chinese-ranchu   | Fuzhou, Fujian province, China | ShortEg Twin g | Absent  | Normal         | Normal        | Normal | Normal | Normal | Normal | Hooded     | None   | Transparen t | Normal | NA        |
| GF126 | black chinese-ranchu            | EG | Chinese-ranchu   | Fuzhou, Fujian province, China | ShortEg Twin g | Absent  | Normal         | Normal        | Normal | Normal | Normal | Normal | Hooded     | None   | Normal       | Normal | black     |
| GF127 | chinese-ranchu                  | EG | Chinese-ranchu   | Fuzhou, Fujian province, China | ShortEg Twin g | Absent  | Normal         | Normal        | Normal | Normal | Normal | Normal | NA         | None   | Normal       | Normal | NA        |
| GF128 | calico oranda                   | WG | Wenyu-Oranda     | Fuzhou, Fujian province, China | ShortEg Twin g | Present | Normal         | Normal        | Normal | Normal | Normal | Normal | Hooded     | None   | Transparen t | Normal | NA        |
| GF129 | calico long-tail chinese-ranchu | EG | Chinese-ranchu   | Fuzhou, Fujian province, China | ShortEg Twin g | Absent  | long-tail      | Normal        | Normal | Normal | Normal | Normal | Hooded     | None   | Transparen t | Normal | NA        |
| GF130 | red white jikin                 | CG | Common.goldfish  | Fuzhou, Fujian province, China | Long Twin      | Present | Normal         | Normal        | Normal | Normal | Normal | Normal | Non-hooded | None   | Normal       | Normal | redwhite  |

|       |                                    |    |                  |                                |                |         |                |              |        |        |          |            |        |              |        |           |
|-------|------------------------------------|----|------------------|--------------------------------|----------------|---------|----------------|--------------|--------|--------|----------|------------|--------|--------------|--------|-----------|
| GF131 | chocolate dorsalfin-ranchu         | EG | Chinese-ranchu   | Fuzhou, Fujian province, China | ShortEg Twin g | NA      | Normal         | Normal       | Normal | Normal | Normal   | Hooded     | None   | Normal       | Normal | NA        |
| GF132 | red broad-tail ryukin              | WG | Wenyu-Oranda     | Fuzhou, Fujian province, China | ShortEg Twin g | Present | broad-tail     | Normal       | Normal | Normal | HumpBack | Non-hooded | None   | Normal       | Normal | red       |
| GF133 | black short-tail oranda            | WG | Wenyu-Oranda     | Fuzhou, Fujian province, China | ShortEg Twin g | Present | short-tail     | Normal       | Normal | Normal | Normal   | Hooded     | None   | Normal       | Normal | black     |
| GF134 | white dorsalfin-ranchu             | WG | Wenyu-Oranda     | Fuzhou, Fujian province, China | ShortEg Twin g | Present | Normal         | Normal       | Normal | Normal | Normal   | Hooded     | None   | Normal       | Normal | white     |
| GF135 | red long-tail shouxin-lionhead     | EG | Eggfish-Lionhead | Fuzhou, Fujian province, China | ShortEg Twin g | Absent  | long-tail      | Normal       | Normal | Normal | Normal   | NA         | None   | Normal       | Normal | red       |
| GF136 | calico wenyu                       | WG | Wenyu-Oranda     | Fuzhou, Fujian province, China | ShortEg Twin g | Present | Normal         | Normal       | Normal | Normal | Normal   | Non-hooded | None   | Transparen t | Normal | NA        |
| GF137 | long-tail redcap-oranda            | WG | Wenyu-Oranda     | Fuzhou, Fujian province, China | ShortEg Twin g | Present | long-tail      | Normal       | Normal | Normal | Normal   | Hooded     | None   | Normal       | Normal | redwhite  |
| GF138 | red white chinese-ranchu           | EG | Chinese-ranchu   | Fuzhou, Fujian province, China | ShortEg Twin g | Absent  | Normal         | Normal       | Normal | Normal | Normal   | Hooded     | None   | Normal       | Normal | redwhite  |
| GF139 | red long-tail highhead-oranda      | WG | Wenyu-Oranda     | Fuzhou, Fujian province, China | ShortEg Twin g | Present | long-tail      | Normal       | Normal | Normal | Normal   | Hooded     | None   | Normal       | Normal | red       |
| GF140 | calico oranda                      | WG | Wenyu-Oranda     | Fuzhou, Fujian province, China | ShortEg Twin g | Present | Normal         | Normal       | Normal | Normal | Normal   | Hooded     | None   | Transparen t | Normal | NA        |
| GF141 | calico long-tail chinese-ranchu    | EG | Chinese-ranchu   | Fuzhou, Fujian province, China | ShortEg Twin g | Absent  | long-tail      | Normal       | Normal | Normal | Normal   | Hooded     | None   | Transparen t | Normal | NA        |
| GF142 | blue long-tail oranda              | WG | Wenyu-Oranda     | Fuzhou, Fujian province, China | ShortEg Twin g | Present | long-tail      | Normal       | Normal | Normal | Normal   | Hooded     | None   | Normal       | Normal | blue      |
| GF143 | red chinese-ranchu                 | EG | Chinese-ranchu   | Fuzhou, Fujian province, China | ShortEg Twin g | Absent  | Normal         | Normal       | Normal | Normal | Normal   | Hooded     | None   | Normal       | Normal | red       |
| GF144 | red matt long-tail highhead-oranda | WG | Wenyu-Oranda     | Fuzhou, Fujian province, China | ShortEg Twin g | Present | long-tail      | Normal       | Normal | Normal | Normal   | Hooded     | None   | Transparen t | Normal | NA        |
| GF145 | black butterfly-tail telescope     | WG | Telescope        | Fuzhou, Fujian province, China | ShortEg Twin g | Present | butterfly-tail | TelescopeEye | NA     | NA     | Normal   | Non-hooded | None   | Normal       | Normal | black     |
| GF146 | chocolate pompon-lionhead          | EG | Egg-pompon       | Fuzhou, Fujian province, China | ShortEg Twin g | Absent  | Normal         | Normal       | Normal | Normal | Normal   | NA         | Pompon | Normal       | Normal | chocolate |
| GF147 | calico chinese-ranchu              | EG | Chinese-ranchu   | Fuzhou, Fujian province, China | ShortEg Twin g | Absent  | Normal         | Normal       | Normal | Normal | Normal   | Hooded     | None   | Transparen t | Normal | NA        |

|       |                                    |    |                  |                                |                |         |                |        |              |        |          |            |        |             |        |           |
|-------|------------------------------------|----|------------------|--------------------------------|----------------|---------|----------------|--------|--------------|--------|----------|------------|--------|-------------|--------|-----------|
| GF148 | black red pompon-oranda            | WG | Wen-pompon       | Fuzhou, Fujian province, China | ShortEg Twin g | Present | Normal         | Normal | Normal       | Normal | Normal   | Hooded     | Pompon | Normal      | Normal | blackred  |
| GF149 | red white matt wen-butterflytail   | WG | Wenyu-Oranda     | Fuzhou, Fujian province, China | ShortEg Twin g | Present | Butterfly Tail | Normal | Normal       | Normal | Normal   | Non-hooded | None   | Transparent | Normal | NA        |
| GF150 | red chinese-ranchu                 | EG | Chinese-ranchu   | Fuzhou, Fujian province, China | ShortEg Twin g | Absent  | Normal         | Normal | Normal       | Normal | Normal   | Hooded     | None   | Normal      | Normal | red       |
| GF151 | red broad-tail shouxin-lionhead    | EG | Eggfish-Lionhead | Fuzhou, Fujian province, China | ShortEg Twin g | Absent  | broad-tail     | Normal | Normal       | Normal | Normal   | Hooded     | None   | Normal      | Normal | red       |
| GF152 | red broad-tail shouxin-lionhead    | EG | Eggfish-Lionhead | Fuzhou, Fujian province, China | ShortEg Twin g | Absent  | broad-tail     | Normal | Normal       | Normal | Normal   | Hooded     | None   | Normal      | Normal | red       |
| GF153 | red white matt wen-butterflytail   | WG | Wenyu-Oranda     | Fuzhou, Fujian province, China | ShortEg Twin g | Present | Butterfly Tail | Normal | Normal       | Normal | Normal   | NA         | None   | Transparent | Normal | NA        |
| GF154 | chocolate long-tail chinese-ranchu | EG | Chinese-ranchu   | Fuzhou, Fujian province, China | ShortEg Twin g | Absent  | long-tail      | Normal | Normal       | Normal | Normal   | Hooded     | None   | Normal      | Normal | chocolate |
| GF155 | chocolate long-tail wen-pompon     | WG | Wen-pompon       | Fuzhou, Fujian province, China | ShortEg Twin g | Present | long-tail      | Normal | Normal       | Normal | Normal   | Non-hooded | Pompon | Normal      | Normal | chocolate |
| GF156 | red white fu-oranda                | WG | Wenyu-Oranda     | Fuzhou, Fujian province, China | ShortEg Twin g | Present | Normal         | Normal | Normal       | Normal | Normal   | Hooded     | None   | Normal      | Normal | redwhite  |
| GF157 | calico broad-tail ryukin           | WG | Wenyu-Oranda     | Fuzhou, Fujian province, China | ShortEg Twin g | Present | broad-tail     | Normal | Normal       | Normal | HumpBack | Non-hooded | None   | Transparent | Normal | NA        |
| GF158 | red long-tail pompon-celestial     | EG | Egg-pompon       | Fuzhou, Fujian province, China | ShortEg Twin g | Absent  | long-tail      | NA     | CelestialEye | NA     | Normal   | Non-hooded | Pompon | Normal      | Normal | red       |
| GF159 | red white long-tail oranda         | WG | Wenyu-Oranda     | Fuzhou, Fujian province, China | ShortEg Twin g | Present | long-tail      | Normal | Normal       | Normal | Normal   | Hooded     | None   | Normal      | Normal | redwhite  |
| GF160 | red matt wenyu                     | WG | Wenyu-Oranda     | Fuzhou, Fujian province, China | ShortEg Twin g | Present | Normal         | Normal | Normal       | Normal | Normal   | Non-hooded | None   | Transparent | Normal | NA        |
| GF161 | red white jikin                    | CG | Common.goldfish  | Fuzhou, Fujian province, China | Long Twin      | Present | Normal         | Normal | Normal       | Normal | Normal   | Non-hooded | None   | Normal      | Normal | redwhite  |
| GF162 | red white matt short-tail oranda   | WG | Wenyu-Oranda     | Fuzhou, Fujian province, China | ShortEg Twin g | Present | short-tail     | Normal | Normal       | Normal | Normal   | Hooded     | None   | Transparent | Normal | NA        |
| GF163 | red wenyu                          | WG | Wenyu-Oranda     | Fuzhou, Fujian province, China | ShortEg Twin g | Present | Normal         | Normal | Normal       | Normal | Normal   | Non-hooded | None   | Normal      | Normal | red       |

|       |                                     |    |                  |                                 |                |         |              |        |        |        |        |            |      |              |        |           |
|-------|-------------------------------------|----|------------------|---------------------------------|----------------|---------|--------------|--------|--------|--------|--------|------------|------|--------------|--------|-----------|
| GF164 | red highhead-oranda                 | WG | Wenyu-Oranda     | Fuzhou, Fujian province, China  | ShortEg Twin g | Present | Normal       | Normal | Normal | Normal | Normal | Hooded     | None | Normal       | Normal | red       |
| GF165 | chocolate highhead-oranda           | WG | Wenyu-Oranda     | Fuzhou, Fujian province, China  | ShortEg Twin g | Present | Normal       | Normal | Normal | Normal | Normal | Hooded     | None | Normal       | Normal | chocolate |
| GF166 | red white chinese-ranchu            | EG | Chinese-ranchu   | Fuzhou, Fujian province, China  | ShortEg Twin g | Absent  | Normal       | Normal | Normal | Normal | Normal | Hooded     | None | Normal       | Normal | redwhite  |
| GF167 | chinese-ranchu                      | EG | Chinese-ranchu   | Fuzhou, Fujian province, China  | ShortEg Twin g | Absent  | Normal       | Normal | Normal | Normal | Normal | Hooded     | None | NA           | Normal | NA        |
| GF168 | chinese-ranchu                      | EG | Chinese-ranchu   | Fuzhou, Fujian province, China  | ShortEg Twin g | Absent  | Normal       | Normal | Normal | Normal | Normal | Hooded     | None | NA           | Normal | NA        |
| GF169 | chinese-ranchu                      | EG | Chinese-ranchu   | Fuzhou, Fujian province, China  | ShortEg Twin g | Absent  | Normal       | Normal | Normal | Normal | Normal | Hooded     | None | NA           | Normal | NA        |
| GF170 | chinese-ranchu                      | EG | Chinese-ranchu   | Fuzhou, Fujian province, China  | ShortEg Twin g | Absent  | Normal       | Normal | Normal | Normal | Normal | Hooded     | None | NA           | Normal | NA        |
| GF171 | chinese-ranchu                      | EG | Chinese-ranchu   | Fuzhou, Fujian province, China  | ShortEg Twin g | Absent  | Normal       | Normal | Normal | Normal | Normal | Hooded     | None | NA           | Normal | NA        |
| GF172 | calico chinese-ranchu               | EG | Chinese-ranchu   | Fuzhou, Fujian province, China  | ShortEg Twin g | Absent  | Normal       | Normal | Normal | Normal | Normal | Hooded     | None | Transparen t | Normal | NA        |
| GF173 | calico chinese-ranchu               | EG | Chinese-ranchu   | Fuzhou, Fujian province, China  | ShortEg Twin g | Absent  | Normal       | Normal | Normal | Normal | Normal | Hooded     | None | Transparen t | Normal | NA        |
| GF174 | red wang-tigerhead                  | EG | Eggfish-Lionhead | Beijing, China                  | ShortEg Twin g | Absent  | Normal       | Normal | Normal | Normal | Normal | Hooded     | None | Normal       | Normal | red       |
| GF175 | red nankin                          | EG | Eggfish-Lionhead | Beijing, China                  | ShortEg Twin g | Absent  | Normal       | Normal | Normal | Normal | Normal | Non-hooded | None | Normal       | Normal | red       |
| GF176 | goosehead                           | EG | Eggfish-Lionhead | Beijing, China                  | ShortEg Twin g | Absent  | Normal       | Normal | Normal | Normal | Normal | Hooded     | None | Normal       | Normal | redwhite  |
| GF177 | red white matt egg-phenix           | EG | Eggfish-Lionhead | Beijing, China                  | ShortEg Twin g | Absent  | Phoenix Tail | Normal | Normal | Normal | Normal | Non-hooded | None | Transparen t | Normal | NA        |
| GF178 | red broad-tail nankin               | EG | Eggfish-Lionhead | Beijing, China                  | ShortEg Twin g | Absent  | broad-tail   | Normal | Normal | Normal | Normal | Non-hooded | None | Normal       | Normal | red       |
| GF179 | red common goldfish                 | CG | Common.goldfish  | Fuzhou, Fujian province, China  | Long Single    | Present | Normal       | Normal | Normal | Normal | Normal | Non-hooded | None | NA           | Normal | red       |
| GF180 | red common goldfish                 | CG | Common.goldfish  | Fuzhou, Fujian province, China  | Long Single    | Present | Normal       | Normal | Normal | Normal | Normal | Non-hooded | None | NA           | Normal | red       |
| GF182 | red white wakin                     | CG | Common.goldfish  | Suzhou, Jiangsu province, China | Long Twin      | Present | Normal       | Normal | Normal | Normal | Normal | Non-hooded | None | Normal       | Normal | redwhite  |
| GF183 | black red long-tail common goldfish | CG | Common.goldfish  | Suzhou, Jiangsu province, China | Long Single    | Present | long-tail    | Normal | Normal | Normal | Normal | Non-hooded | None | Normal       | Normal | blackred  |
| GF184 | red white common goldfish           | CG | Common.goldfish  | Suzhou, Jiangsu province, China | Long Single    | Present | Normal       | Normal | Normal | Normal | Normal | Non-hooded | None | Normal       | Normal | redwhite  |

|       |                        |    |                 |                                       |      |        |         |             |        |        |        |        |        |            |      |             |        |          |
|-------|------------------------|----|-----------------|---------------------------------------|------|--------|---------|-------------|--------|--------|--------|--------|--------|------------|------|-------------|--------|----------|
| GF185 | calico common goldfish | CG | Common.goldfish | Suzhou, Jiangsu province, China       | Long | Single | Present | Normal      | Normal | Normal | Normal | Normal | Normal | Non-hooded | None | Transparent | Normal | NA       |
| GF186 | red white wakin        | CG | Common.goldfish | Guangzhou, Guangdong province, China  | Long | Twin   | Present | Normal      | Normal | Normal | Normal | Normal | Normal | Non-hooded | None | Normal      | Normal | redwhite |
| GF187 | crucian carp ZJPH1     | CC | Crucian.carp    | Pinghu, Zhejiang province, China      | Long | Single | Present | single-tail | Normal | Normal | Normal | Normal | Normal | Non-hooded | None | Normal      | Normal | grey     |
| GF188 | crucian carp ZJPH2     | CC | Crucian.carp    | Pinghu, Zhejiang province, China      | Long | Single | Present | single-tail | Normal | Normal | Normal | Normal | Normal | Non-hooded | None | Normal      | Normal | grey     |
| GF189 | crucian carp JSNJ1     | CC | Crucian.carp    | Nanjing, Jiangsu province, China      | Long | Single | Present | single-tail | Normal | Normal | Normal | Normal | Normal | Non-hooded | None | Normal      | Normal | grey     |
| GF190 | crucian carp JXSR1     | CC | Crucian.carp    | Shangrao, Jiangxi province, China     | Long | Single | Present | single-tail | Normal | Normal | Normal | Normal | Normal | Non-hooded | None | Normal      | Normal | grey     |
| GF191 | crucian carp JXXY1     | CC | Crucian.carp    | Xinyu, Jiangxi province, China        | Long | Single | Present | single-tail | Normal | Normal | Normal | Normal | Normal | Non-hooded | None | Normal      | Normal | grey     |
| GF192 | crucian carp HNX1      | CC | Crucian.carp    | Xinyang, Henan province, China        | Long | Single | Present | single-tail | Normal | Normal | Normal | Normal | Normal | Non-hooded | None | Normal      | Normal | grey     |
| GF193 | crucian carp HNZMD1    | CC | Crucian.carp    | Zhumadian, Henan province, China      | Long | Single | Present | single-tail | Normal | Normal | Normal | Normal | Normal | Non-hooded | None | Normal      | Normal | grey     |
| GF194 | crucian carp HLJHEB1   | CC | Crucian.carp    | Haerbin, Heilongjiang province, China | Long | Single | Present | single-tail | Normal | Normal | Normal | Normal | Normal | Non-hooded | None | Normal      | Normal | grey     |
| GF195 | crucian carp SDBZ1     | CC | Crucian.carp    | Binzhou, Shandong province, China     | Long | Single | Present | single-tail | Normal | Normal | Normal | Normal | Normal | Non-hooded | None | Normal      | Normal | grey     |
| GF196 | crucian carp FJSM1     | CC | Crucian.carp    | Sanming, Fujian province, China       | Long | Single | Present | single-tail | Normal | Normal | Normal | Normal | Normal | Non-hooded | None | Normal      | Normal | grey     |
| GF197 | crucian carp FJSM2     | CC | Crucian.carp    | Sanming, Fujian province, China       | Long | Single | Present | single-tail | Normal | Normal | Normal | Normal | Normal | Non-hooded | None | Normal      | Normal | NA       |
| GF198 | crucian carp FJLY1     | CC | Crucian.carp    | Longyan, Fujian province, China       | Long | Single | Present | single-tail | Normal | Normal | Normal | Normal | Normal | Non-hooded | None | Normal      | Normal | grey     |
| GF199 | crucian carp FJZN1     | CC | Crucian.carp    | Zhouning, Fujian province, China      | Long | Single | Present | single-tail | Normal | Normal | Normal | Normal | Normal | Non-hooded | None | Normal      | Normal | grey     |
| GF200 | crucian carp FJZN2     | CC | Crucian.carp    | Zhouning, Fujian province, China      | Long | Single | Present | single-tail | Normal | Normal | Normal | Normal | Normal | Non-hooded | None | Normal      | Normal | grey     |
| GF201 | crucian carp BJY01     | CC | Crucian.carp    | Fuzhou, Fujian province, China        | Long | Single | Present | single-tail | Normal | Normal | Normal | Normal | Normal | Non-hooded | None | Normal      | Normal | NA       |
| GF202 | crucian carp BJY02     | CC | Crucian.carp    | Fuzhou, Fujian province, China        | Long | Single | Present | single-tail | Normal | Normal | Normal | Normal | Normal | Non-hooded | None | Normal      | Normal | NA       |



\* WG: wen-goldfish ; EG: egg-goldfish; CG: common goldfish; CC: crucian carp, All information for the detail were listed in Supplementary Data 2.

**Table S14. Summary resequencing statistics for the 202 resequenced genomes.**

| <b>Sample ID</b> | <b>Sequence coverage(x)</b> | <b>Sequencing mode</b> | <b>Clean Bases Number(Gbp)</b> |
|------------------|-----------------------------|------------------------|--------------------------------|
| GF001            | 15.6                        | paired end 150 nt      | 28.0                           |
| GF002            | 16.6                        | paired end 150 nt      | 30.0                           |
| GF003            | 10.6                        | paired end 150 nt      | 19.1                           |
| GF004            | 11.7                        | paired end 150 nt      | 21.0                           |
| GF005            | 12.2                        | paired end 150 nt      | 22.0                           |
| GF006            | 11.1                        | paired end 150 nt      | 19.9                           |
| GF007            | 12.2                        | paired end 150 nt      | 22.0                           |
| GF008            | 9.9                         | paired end 150 nt      | 17.7                           |
| GF009            | 13.8                        | paired end 150 nt      | 24.9                           |
| GF010            | 13.2                        | paired end 150 nt      | 23.8                           |
| GF011            | 10.6                        | paired end 150 nt      | 19.1                           |
| GF012            | 11.1                        | paired end 150 nt      | 20.0                           |
| GF013            | 12.1                        | paired end 150 nt      | 21.8                           |
| GF014            | 10.1                        | paired end 150 nt      | 18.2                           |
| GF015            | 19.8                        | paired end 150 nt      | 35.6                           |
| GF016            | 12.3                        | paired end 150 nt      | 22.1                           |
| GF017            | 14.5                        | paired end 150 nt      | 26.1                           |
| GF018            | 10.0                        | paired end 150 nt      | 18.0                           |
| GF019            | 12.7                        | paired end 150 nt      | 22.8                           |
| GF020            | 9.9                         | paired end 150 nt      | 17.8                           |
| GF021            | 9.9                         | paired end 150 nt      | 17.8                           |
| GF022            | 12.9                        | paired end 150 nt      | 23.2                           |
| GF023            | 13.6                        | paired end 150 nt      | 24.4                           |
| GF024            | 12.6                        | paired end 150 nt      | 22.8                           |
| GF025            | 13.2                        | paired end 150 nt      | 23.8                           |
| GF026            | 11.5                        | paired end 150 nt      | 20.8                           |
| GF027            | 11.1                        | paired end 150 nt      | 20.1                           |
| GF028            | 10.1                        | paired end 150 nt      | 18.2                           |
| GF029            | 12.9                        | paired end 150 nt      | 23.2                           |
| GF030            | 14.3                        | paired end 150 nt      | 25.7                           |
| GF031            | 10.2                        | paired end 150 nt      | 18.3                           |
| GF032            | 10.1                        | paired end 150 nt      | 18.2                           |
| GF033            | 12.2                        | paired end 150 nt      | 22.0                           |
| GF034            | 9.9                         | paired end 150 nt      | 17.7                           |
| GF035            | 10.9                        | paired end 150 nt      | 19.5                           |
| GF036            | 9.6                         | paired end 150 nt      | 17.3                           |
| GF037            | 9.9                         | paired end 150 nt      | 17.8                           |
| GF038            | 10.0                        | paired end 150 nt      | 18.0                           |
| GF039            | 13.9                        | paired end 150 nt      | 25.0                           |
| GF040            | 11.4                        | paired end 150 nt      | 20.6                           |
| GF041            | 10.4                        | paired end 150 nt      | 18.8                           |
| GF042            | 11.5                        | paired end 150 nt      | 20.7                           |
| GF043            | 9.1                         | paired end 150 nt      | 16.3                           |
| GF044            | 11.0                        | paired end 150 nt      | 19.8                           |
| GF045            | 10.4                        | paired end 150 nt      | 18.6                           |
| GF046            | 10.9                        | paired end 150 nt      | 19.7                           |
| GF047            | 10.9                        | paired end 150 nt      | 19.7                           |
| GF048            | 10.0                        | paired end 150 nt      | 18.0                           |
| GF049            | 12.4                        | paired end 150 nt      | 22.2                           |
| GF050            | 10.6                        | paired end 150 nt      | 19.1                           |
| GF051            | 10.1                        | paired end 150 nt      | 18.1                           |

|       |      |                   |      |
|-------|------|-------------------|------|
| GF052 | 10.0 | paired end 150 nt | 18.0 |
| GF053 | 10.5 | paired end 150 nt | 18.9 |
| GF054 | 10.3 | paired end 150 nt | 18.5 |
| GF055 | 10.2 | paired end 150 nt | 18.4 |
| GF056 | 11.6 | paired end 150 nt | 20.8 |
| GF057 | 10.0 | paired end 150 nt | 18.0 |
| GF058 | 12.3 | paired end 150 nt | 22.1 |
| GF059 | 11.0 | paired end 150 nt | 19.8 |
| GF060 | 11.6 | paired end 150 nt | 20.8 |
| GF061 | 10.7 | paired end 150 nt | 19.2 |
| GF062 | 12.5 | paired end 150 nt | 22.4 |
| GF063 | 11.0 | paired end 150 nt | 19.8 |
| GF064 | 13.0 | paired end 150 nt | 23.3 |
| GF065 | 11.7 | paired end 150 nt | 21.1 |
| GF066 | 11.5 | paired end 150 nt | 20.7 |
| GF067 | 11.8 | paired end 150 nt | 21.2 |
| GF068 | 13.3 | paired end 150 nt | 23.9 |
| GF069 | 11.1 | paired end 150 nt | 20.0 |
| GF070 | 11.1 | paired end 150 nt | 20.0 |
| GF071 | 8.8  | paired end 150 nt | 15.8 |
| GF072 | 10.7 | paired end 150 nt | 19.3 |
| GF073 | 10.3 | paired end 150 nt | 18.5 |
| GF074 | 12.9 | paired end 150 nt | 23.3 |
| GF075 | 11.7 | paired end 150 nt | 21.1 |
| GF076 | 11.6 | paired end 150 nt | 20.9 |
| GF077 | 10.7 | paired end 150 nt | 19.2 |
| GF078 | 10.3 | paired end 150 nt | 18.6 |
| GF079 | 10.0 | paired end 150 nt | 17.9 |
| GF080 | 15.4 | paired end 150 nt | 27.7 |
| GF081 | 13.1 | paired end 150 nt | 23.6 |
| GF082 | 11.2 | paired end 150 nt | 20.2 |
| GF083 | 11.6 | paired end 150 nt | 20.8 |
| GF084 | 11.1 | paired end 150 nt | 19.9 |
| GF085 | 10.1 | paired end 150 nt | 18.2 |
| GF086 | 16.7 | paired end 150 nt | 30.0 |
| GF087 | 15.8 | paired end 150 nt | 28.5 |
| GF088 | 14.6 | paired end 150 nt | 26.2 |
| GF089 | 13.2 | paired end 150 nt | 23.7 |
| GF090 | 11.4 | paired end 150 nt | 20.5 |
| GF091 | 10.0 | paired end 150 nt | 18.0 |
| GF092 | 15.6 | paired end 150 nt | 28.1 |
| GF093 | 13.3 | paired end 150 nt | 23.9 |
| GF094 | 12.4 | paired end 150 nt | 22.3 |
| GF095 | 12.3 | paired end 150 nt | 22.2 |
| GF096 | 12.4 | paired end 150 nt | 22.3 |
| GF097 | 13.8 | paired end 150 nt | 24.8 |
| GF098 | 11.1 | paired end 150 nt | 20.0 |
| GF099 | 9.9  | paired end 150 nt | 17.8 |
| GF100 | 11.1 | paired end 150 nt | 19.9 |
| GF101 | 11.7 | paired end 150 nt | 21.1 |
| GF102 | 11.2 | paired end 150 nt | 20.2 |
| GF103 | 14.7 | paired end 150 nt | 26.5 |
| GF104 | 11.0 | paired end 150 nt | 19.8 |
| GF105 | 13.0 | paired end 150 nt | 23.4 |
| GF106 | 11.0 | paired end 150 nt | 19.9 |
| GF107 | 10.7 | paired end 150 nt | 19.2 |

|       |      |                   |      |
|-------|------|-------------------|------|
| GF108 | 11.5 | paired end 150 nt | 20.8 |
| GF109 | 10.0 | paired end 150 nt | 18.1 |
| GF110 | 11.4 | paired end 150 nt | 20.5 |
| GF111 | 11.0 | paired end 150 nt | 19.7 |
| GF112 | 11.4 | paired end 150 nt | 20.6 |
| GF113 | 10.0 | paired end 150 nt | 18.1 |
| GF114 | 12.9 | paired end 150 nt | 23.1 |
| GF115 | 12.0 | paired end 150 nt | 21.6 |
| GF116 | 13.1 | paired end 150 nt | 23.7 |
| GF117 | 12.1 | paired end 150 nt | 21.8 |
| GF118 | 12.2 | paired end 150 nt | 22.0 |
| GF119 | 11.6 | paired end 150 nt | 20.9 |
| GF120 | 12.2 | paired end 150 nt | 22.0 |
| GF121 | 10.7 | paired end 150 nt | 19.3 |
| GF122 | 12.2 | paired end 150 nt | 21.9 |
| GF123 | 11.3 | paired end 150 nt | 20.3 |
| GF124 | 11.6 | paired end 150 nt | 20.9 |
| GF125 | 11.4 | paired end 150 nt | 20.5 |
| GF126 | 11.6 | paired end 150 nt | 20.9 |
| GF127 | 13.5 | paired end 150 nt | 24.3 |
| GF128 | 11.7 | paired end 150 nt | 21.1 |
| GF129 | 12.0 | paired end 150 nt | 21.7 |
| GF130 | 11.3 | paired end 150 nt | 20.4 |
| GF131 | 13.2 | paired end 150 nt | 23.8 |
| GF132 | 11.6 | paired end 150 nt | 20.8 |
| GF133 | 12.3 | paired end 150 nt | 22.2 |
| GF134 | 12.3 | paired end 150 nt | 22.2 |
| GF135 | 11.8 | paired end 150 nt | 21.3 |
| GF136 | 11.7 | paired end 150 nt | 21.0 |
| GF137 | 11.2 | paired end 150 nt | 20.1 |
| GF138 | 13.3 | paired end 150 nt | 24.0 |
| GF139 | 11.8 | paired end 150 nt | 21.2 |
| GF140 | 12.1 | paired end 150 nt | 21.8 |
| GF141 | 12.9 | paired end 150 nt | 23.3 |
| GF142 | 12.8 | paired end 150 nt | 23.1 |
| GF143 | 12.7 | paired end 150 nt | 22.9 |
| GF144 | 7.1  | paired end 150 nt | 12.9 |
| GF145 | 9.1  | paired end 150 nt | 16.3 |
| GF146 | 9.0  | paired end 150 nt | 16.2 |
| GF147 | 13.5 | paired end 150 nt | 24.4 |
| GF148 | 10.5 | paired end 150 nt | 18.9 |
| GF149 | 11.6 | paired end 150 nt | 20.9 |
| GF150 | 12.3 | paired end 150 nt | 22.1 |
| GF151 | 12.6 | paired end 150 nt | 22.6 |
| GF152 | 10.9 | paired end 150 nt | 19.6 |
| GF153 | 11.9 | paired end 150 nt | 21.5 |
| GF154 | 14.5 | paired end 150 nt | 26.0 |
| GF155 | 12.8 | paired end 150 nt | 23.1 |
| GF156 | 10.5 | paired end 150 nt | 18.9 |
| GF157 | 11.0 | paired end 150 nt | 19.7 |
| GF158 | 10.8 | paired end 150 nt | 19.4 |
| GF159 | 10.9 | paired end 150 nt | 19.7 |
| GF160 | 9.2  | paired end 150 nt | 16.6 |
| GF161 | 10.3 | paired end 150 nt | 18.6 |
| GF162 | 11.3 | paired end 150 nt | 20.4 |
| GF163 | 10.4 | paired end 150 nt | 18.7 |

|       |      |                   |      |
|-------|------|-------------------|------|
| GF164 | 11.4 | paired end 150 nt | 20.5 |
| GF165 | 11.8 | paired end 150 nt | 21.2 |
| GF166 | 13.3 | paired end 150 nt | 24.0 |
| GF167 | 11.0 | paired end 150 nt | 19.8 |
| GF168 | 11.4 | paired end 150 nt | 20.5 |
| GF169 | 11.4 | paired end 150 nt | 20.6 |
| GF170 | 10.6 | paired end 150 nt | 19.0 |
| GF171 | 9.0  | paired end 150 nt | 16.2 |
| GF172 | 15.1 | paired end 150 nt | 27.2 |
| GF173 | 14.2 | paired end 150 nt | 25.6 |
| GF174 | 10.5 | paired end 150 nt | 18.9 |
| GF175 | 10.0 | paired end 150 nt | 18.0 |
| GF176 | 10.5 | paired end 150 nt | 18.9 |
| GF177 | 4.2  | paired end 150 nt | 7.6  |
| GF178 | 12.2 | paired end 150 nt | 22.0 |
| GF179 | 34.6 | paired end 150 nt | 62.2 |
| GF180 | 36.9 | paired end 150 nt | 66.4 |
| GF182 | 10.8 | paired end 150 nt | 19.4 |
| GF183 | 12.2 | paired end 150 nt | 21.9 |
| GF184 | 10.6 | paired end 150 nt | 19.1 |
| GF185 | 8.2  | paired end 150 nt | 14.7 |
| GF186 | 9.4  | paired end 150 nt | 17.0 |
| GF187 | 10.5 | paired end 150 nt | 18.9 |
| GF188 | 11.1 | paired end 150 nt | 19.9 |
| GF189 | 11.0 | paired end 150 nt | 19.8 |
| GF190 | 11.1 | paired end 150 nt | 20.1 |
| GF191 | 9.7  | paired end 150 nt | 17.5 |
| GF192 | 15.2 | paired end 150 nt | 27.4 |
| GF193 | 10.6 | paired end 150 nt | 19.1 |
| GF194 | 11.0 | paired end 150 nt | 19.7 |
| GF195 | 12.1 | paired end 150 nt | 21.7 |
| GF196 | 9.1  | paired end 150 nt | 16.4 |
| GF197 | 10.0 | paired end 150 nt | 18.0 |
| GF198 | 10.6 | paired end 150 nt | 19.1 |
| GF199 | 7.8  | paired end 150 nt | 14.1 |
| GF200 | 9.1  | paired end 150 nt | 16.4 |
| GF201 | 10.8 | paired end 150 nt | 19.4 |
| GF202 | 11.2 | paired end 150 nt | 20.1 |

---

**Dataset S1.** Photo of 185 goldfishes and 16 crucian carps used for resequencing.

**Dataset S2.** Information included 185 goldfishes, 16 crucian carps and 33 common carps.

**Dataset S3.** Sweep regions and candidate genes list for goldfish domestication.

**Dataset S4.** Genotype heatmap of sweep regions for goldfish domestication.

**Dataset S5.** Candidate regions and candidate genes list for dorsal fin (Wen and Egg goldfish) trait GWAS.

**Dataset S6.** Genotype heatmap of candidate regions for dorsal fin trait GWAS.

**Dataset S7.** Candidate regions and candidate genes list for Blue-Red color trait GWAS.

**Dataset S8.** Candidate regions and candidate genes list for white-red color trait GWAS.

**Dataset S9.** Candidate regions and candidate genes list for Black-Red color trait GWAS.

**Dataset S10.** Homolog gene pairs list for Subgenomes A and B.

**Dataset S11.** Whole genome gene function annotation based on GO and KEGG database.

**Dataset S12.** The transcript expression level of ten tissues of goldfish.

## SI References

1. T. Nakajima, M. J. Hudson, J. Uchiyama, K. Makibayashi, J. Zhang, Publisher Correction: Common carp aquaculture in Neolithic China dates back 8,000 years. *Nature Ecology & Evolution* **3**, 1494 (2019).
2. K. Katoh, D. M. Standley, MAFFT: Iterative Refinement and Additional Methods. *Methods in Molecular Biology* **1079**, 131-146 (2014).
3. S. C. Chen, Transparency and Mottling, a Case of Mendelian Inheritance in the Goldfish *CARASSIUS AURATUS*. *Genetics* **13**, 434-452 (1928).
4. G. F. Hervey, E. Billardon-Sauvigny. Mus éum national d'histoire, The goldfish of China in the XVIII century, Hervey, Eds. (China Society, 1950),pp.2-3.
5. Y. Matsui, "Physically speaking" in Goldfish, Matsui, Eds. (T.F.H. Publications,1981), pp.30-32.
6. S. Chen, A history of the domestication and the factors of the varietal formation of the common goldfish, *Carassius auratus*. *Scientia Sinica* **5**, 287-321 (1956).
7. S. C. Chen, The inheritance of blue and brown colours in the goldfish, *Carassius auratus*. *J. Genet.* **29**, 61-74 (1934).
8. J. Smartt, "Introduction" in Goldfish Varieties and Genetics: A Handbook for Breeders, Smartt, Eds. (Blackwell Science,2008), pp.1-10.
9. E. Billardon-Sauvigny, F. N. Martinet, "Introduction" in Histoire naturelle des dorades de la Chine, Billardon-Sauvigny, Eds. (Wentworth Press,2019),pp.19.
10. X. Wang, X. Gan, J. Li, Y. Chen, S. He, Cyprininae phylogeny revealed independent origins of the Tibetan Plateau endemic polyploid cyprinids and their diversifications related to the Neogene uplift of the plateau. *Sci. China Life. Sci.* **59**, 1149-1165 (2016).
11. T. G. Maja, N. Chen, Using RepeatMasker to identify repetitive elements in genomic sequences, *Current Protocols in Bioinformatics* **25**, 10-14 (2009).
12. K. Katoh, MAFFT: a novel method for rapid multiple sequence alignment based on fast Fourier transform. *Nucleic Acids Res.* **30**,3059-3066 (2002).
13. K. Howe *et al.*, The zebrafish reference genome sequence and its relationship to the human genome. *Nature* **496**, 498-503 (2013).
14. Y. Wang *et al.*, Erratum: The draft genome of the grass carp (*Ctenopharyngodon idellus*) provides insights into its evolution and vegetarian adaptation. *Nat. Genet.* **47**, 962 (2015).
15. J. L. Anderson, *et al.*, Multiple Sex-Associated Regions and a Putative Sex Chromosome in Zebrafish Revealed by RAD Mapping and Population Genomics, *PLoS One*, **7**, e40701 (2012).
16. M. Wen, *et al.*, Sex chromosome and sex locus characterization in the goldfish, *Carassius auratus*. *BioRxiv*, 875377 (2019).

17. R. Goto-Kazeto, *et al.*, Temperature-dependent sex differentiation in goldfish: Establishing the temperature-sensitive period and effect of constant and fluctuating water temperatures. *Aquaculture* **254**, 617-624 (2006).
18. B. Langmead, S. L. Salzberg, Fast gapped-read alignment with Bowtie 2. *Nat. methods* **9**, 357-359 (2012).
19. T. O. Yamamoto, T. Kajishima, Sex hormone induction of sex reversal in the goldfish and evidence for male heterogamity. *J. Exp. Zool.* **168**, 215-221 (1968).
20. F. Martinon, O. Gaide, V. Petrilli, A. Mayor, J. Tschopp, NALP inflammasomes: a central role in innate immunity. *Semin. immunopathol.* **29**, 213-229 (2007).
21. A. Ferrer-Admetlla *et al.*, Balancing selection is the main force shaping the evolution of innate immunity genes. *J. Immunol.* **181**, 1315-1322 (2008).
22. P. Xu *et al.*, Genome sequence and genetic diversity of the common carp, *Cyprinus carpio*. *Nat. Genet.* **46**, 1212-1219 (2014).
23. Y. Wang, *et al.*, The draft genome of the grass carp (*Ctenopharyngodon idellus*) provides insights into its evolution and vegetarian adaptation. *Nat. Genet.* **47**, 625-631 (2015).
24. J. Smartt, "Introduction" in *Goldfish Varieties and Genetics: A Handbook for Breeders*, Smartt, Eds. (Blackwell Science, 2008), pp.1-10.
25. V. Wucher, *et al.*, FEELnc: a tool for long non-coding RNA annotation and its application to the dog transcriptome. *Nucleic Acids Res.* **45**, e57 (2017).
26. A. Choudhuri, T. Evans, U. Maitra, Non-core subunit eIF3h of translation initiation factor eIF3 regulates zebrafish embryonic development. *Dev. Dyn.* **239**, 1632-1644 (2010).
27. A. Docquier, *et al.*, eIF3f depletion impedes mouse embryonic development, reduces adult skeletal muscle mass and amplifies muscle loss during disuse. *The J. physiol.* **597**, 3107-3131 (2019).
28. E. Carlsson, *et al.*, Potential role of a navigator gene NAV3 in colorectal cancer. *Br. J. Cancer* **106**, 517-524 (2012).
29. A. A. George, S. Hayden, G. R. Stanton, S. E. Brockerhoff, Arf6 and the 5'phosphatase of synaptojanin 1 regulate autophagy in cone photoreceptors. *BioEssays* **38**, S119-S135 (2016).
30. A. Rissone, *et al.*, Adenylate Kinase 2 Regulates Zebrafish Primitive and Definitive Hematopoiesis. *Blood* **120**, 1208-1208 (2012).
31. S. Volpi, *et al.*, EXTL3 mutations cause skeletal dysplasia, immune deficiency, and developmental delay. *J. Exp. Med.* **214**, 623-637 (2017).
32. J. C. Moore *et al.*, T cell immune deficiency in zap70 mutant zebrafish. *Molecular and cellular biology* **36**, 2868-2876 (2016).



33. R. Maeda, I. V. Pacentine, T. Erickson, T. Nicolson, Functional analysis of the transmembrane and cytoplasmic domains of Pcdh15a in zebrafish hair cells. *J. Neurosci.* **37**, 3231-3245 (2017).
34. S. J. Wanner, I. Saeger, S. Guthrie, V. E. Prince, Facial motor neuron migration advances. *Curr. Opin. Neurobiol.* **23**, 943-950 (2013).
35. Y. Matsui, Genetical studies on gold-fish of Japan. 2. On the Mendelian inheritance of the telescope eyes of gold-fish. *Journal of the Imperial Fisheries Institute* **30**, 37-46 (1934).
36. G. F. Hervey, J. Hems, The goldfish, Hervey, Eds. (Batchworth Press, London, 1948), pp.232.
37. C. Darwin, "Maldonado" in The Voyage of the Beagle. Darwin, Eds. (Penguin Books, 1839).pp.61-70.
38. A. A. Sharov, *et al.*, Bone morphogenetic protein (BMP) signaling controls hair pigmentation by means of cross-talk with the melanocortin receptor-1 pathway. *P. Natl. Acad. Sci. U. S. A.* **102**, 93-98 (2005).
39. C. B. Kaelin, *et al.*, Specifying and sustaining pigmentation patterns in domestic and wild cats. *Science* **337**, 1536-1541 (2012).
40. V. A. Kottler, *et al.*, Adenylate cyclase 5 is required for melanophore and male pattern development in the guppy (*Poecilia reticulata*). *Pig. Cell Melanoma R.* **28**, 545-558 (2015).
41. P. Elena, D. Fredj-Reygrobellet, G. Moulin, P. Lapalus, Pharmacological characteristics of  $\beta$ -adrenrgic-sensitive adenylate cyclase in non pigmented and in pigmented cells of bovine ciliary process. *Curr. Eye Res.* **3**, 1383-1389 (1984).
42. J. D'Orazio, D. E. Fisher, Central role for cAMP signaling in pigmentation and UV resistance. *Cell cycle* **10**, 8-9 (2011).
43. K. G. Daly, *et al.*, Ancient goat genomes reveal mosaic domestication in the Fertile Crescent. *Science* **361**, 85-88 (2018).
44. F. J. Alberto, *et al.*, Convergent genomic signatures of domestication in sheep and goats. *Nature communications* **9**, 813 (2018).
45. N. Chen, *et al.*, Whole-genome resequencing reveals world-wide ancestry and adaptive introgression events of domesticated cattle in East Asia. *Nature communications* **9**, 2337 (2018).
46. J. Leno-Colorado, N. J. Hudson, A. Reverter, M. Perez-Enciso, A Pathway-Centered Analysis of Pig Domestication and Breeding in Eurasia. *G3-Genes Genomes Genetics* **7**, 2171-2184 (2017).
47. S. C. Chen, Transparency and mottling, a case of Mendelian inheritance in the goldfish *Carassius auratus*. *Genetics* **13**, 434 (1928).
48. T. Kajishima, Genetic and developmental analysis of some new color mutants in the goldfish, *Carassius auratus*. *Genetics* **86**, 161-174 (1977).

49. T. O. Yamamoto, A YY male goldfish from mating estrone-induced XY female and normal male. *J. Hered.* **66**, 2-4 (1975).
50. S. Ohno, "The conservative nature of chromosomal evolution" in *Evolution by Gene Duplication*, Ohno, Eds. (Springer, 1970), pp.41-46.
51. A. M. Bolger, M. Lohse, B. Usadel, Trimmomatic: a flexible trimmer for Illumina sequence data. *Bioinformatics* **30**, 2114-2120 (2014).
52. G. Benson, Tandem repeats finder: a program to analyze DNA sequences. *Nucleic Acids Res.* **27**, 573-580 (1999).
53. G. Abrusan, N. Grundmann, L. DeMester, W. Makalowski, TEclass--a tool for automated classification of unknown eukaryotic transposable elements. *Bioinformatics* **25**, 1329-1330 (2009).
54. Z. Xu, H. Wang, LTR\_FINDER: an efficient tool for the prediction of full-length LTR retrotransposons. *Nucleic Acids Res.* **35**, 265-268 (2007).
55. D. Ellinghaus, S. Kurtz, U. Willhoeft, LTRharvest, an efficient and flexible software for de novo detection of LTR retrotransposons. *BMC bioinformatics* **9**, 18 (2008).
56. S. Ou, N. Jiang, LTR\_retriever: A Highly Accurate and Sensitive Program for Identification of Long Terminal Repeat Retrotransposons. *Plant Physiol.* **176**, 1410-1422 (2018).
57. N. Chen, *et al.*, Whole-genome resequencing reveals world-wide ancestry and adaptive introgression events of domesticated cattle in East Asia. *Nat. Commun.* **9**, 2337 (2018).
58. M. G. Grabherr, *et al.*, Full-length transcriptome assembly from RNA-Seq data without a reference genome. *Nat. Biotechnol.* **29**, 644-652 (2011).
59. I. Korf, Gene finding in novel genomes. *BMC bioinformatics* **5**, 59 (2004).
60. A. Lomsadze, V. Ter-Hovhannisyan, Y. O. Chernoff, M. Borodovsky, Gene identification in novel eukaryotic genomes by self-training algorithm. *Nucleic Acids Res.* **33**, 6494-6506 (2005).
61. M. Stanke, O. Schoffmann, B. Morgenstern, S. Waack, Gene prediction in eukaryotes with a generalized hidden Markov model that uses hints from external sources. *BMC bioinformatics* **7**, 62 (2006).
62. B. L. Cantarel, *et al.*, MAKER: an easy-to-use annotation pipeline designed for emerging model organism genomes. *Genome Res.* **18**, 188-196 (2008).
63. H. Li, Minimap2: pairwise alignment for nucleotide sequences. *Bioinformatics* **34**, 3094-3100 (2018).
64. F. Cabanettes, C. Klopp, D-GENIES: dot plot large genomes in an interactive, efficient and simple way. *PeerJ.* **6**, e4958 (2018).
65. Z. Hao, *et al.*, RIdeogram: drawing SVG graphics to visualize and map genome-wide data on the ideograms. *Peer J.* **6**, e251 (2019).

66. B. Langmead, C. Wilks, V. Antonescu, R. Charles, Scaling read aligners to hundreds of threads on general-purpose processors. *Bioinformatics* **35**, 421-432 (2019).
67. A. R. Quinlan, I. M. Hall, BEDTools: a flexible suite of utilities for comparing genomic features. *Bioinformatics* **26**, 841-842 (2010).
68. B. J. Haas, *et al.*, De novo transcript sequence reconstruction from RNA-seq using the Trinity platform for reference generation and analysis. *Nat. Protoc.* **8**, 1494-1512 (2013).
69. D. Kim, *et al.*, TopHat2: accurate alignment of transcriptomes in the presence of insertions, deletions and gene fusions. *Genome Biol.* **14**, R36 (2013).
70. H. Li, R. Durbin, Fast and accurate short read alignment with Burrows-Wheeler transform. *Bioinformatics* **25**, 1754-1760 (2009).
71. H. Li, *et al.*, The Sequence Alignment/Map format and SAMtools. *Bioinformatics* **25**, 2078-2079 (2009).
72. G. G. Faust, I. M. Hall, SAMBLASTER: fast duplicate marking and structural variant read extraction. *Bioinformatics* **30**, 2503-2505 (2014).
73. A. McKenna, *et al.*, The Genome Analysis Toolkit: a MapReduce framework for analyzing next-generation DNA sequencing data. *Genome Res.* **20**, 1297-1303 (2010).
- 74.S. Summa, *et al.*, GATK hard filtering: tunable parameters to improve variant calling for next generation sequencing targeted gene panel data. *BMC Bioinformatics* **18**,119 (2017).
75. P. Danecek, *et al.*, The variant call format and VCFtools. *Bioinformatics* **27**, 2156-2158 (2011).
76. B. L. Browning, Y. Zhou, S. R. Browning, A One-Penny Imputed Genome from Next-Generation Reference Panels. *Am. J. Hum. Genet.* **103**, 338-348 (2018).
77. P. Cingolani, *et al.*, A program for annotating and predicting the effects of single nucleotide polymorphisms, SnpEff: SNPs in the genome of *Drosophila melanogaster* strain w1118; iso-2; iso-3. *Fly* **6**, 80-92 (2012).
78. P. Xu *et al.*, Genome sequence and genetic diversity of the common carp, *Cyprinus carpio*. *Nat. Genet.* **46**, 1212-1219 (2014).
79. C. C. Chang, *et al.*, Second-generation PLINK: rising to the challenge of larger and richer datasets. *Gigascience* **4**, 7 (2015).
80. V. Lefort, R. Desper, O. Gascuel, FastME 2.0: A Comprehensive, Accurate, and Fast Distance-Based Phylogeny Inference Program. *Mol. Biol. Evol.* **32**, 2798-2800 (2015).
81. I. Letunic, P. Bork, Interactive tree of life (iTOL) v3: an online tool for the display and annotation of phylogenetic and other trees. *Nucleic Acids Res.* **44**, 242-245 (2016).

82. J. K. Pickrell, J. K. Pritchard, Inference of population splits and mixtures from genome-wide allele frequency data. *PLoS Genet.* **8**, e1002967 (2012).
83. M. DeGiorgio, C. D. Huber, M. J. Hubisz, I. Hellmann, R. Nielsen, SweepFinder2: increased sensitivity, robustness and flexibility. *Bioinformatics* **32**, 1895-1897 (2016).
84. F. Supek, M. Bosnjak, N. Skunca, T. Smuc, REVIGO summarizes and visualizes long lists of gene ontology terms. *PloS One* **6**, e21800 (2011).
85. P. Shannon, *et al.*, Cytoscape: a software environment for integrated models of biomolecular interaction networks. *Genome Res.* **13**, 2498-2504 (2003).
86. M. Gautier, A. Klassmann, R. Vitalis, rehh 2.0: a reimplementation of the R package rehh to detect positive selection from haplotype structure. *Mole. Ecol. Res.* **17**, 78-90 (2017).
