# Supplementary material
Source: PubMed Central journal article supplement (PMC7703540)
Supplement: pnas.2005545117.sd01.pdf [file pnas.2005545117.sd01.pdf]

| SAMPLE | REG NO. | SAMPLE PHOTO                                                                        |
|--------|---------|-------------------------------------------------------------------------------------|
| GF001  | 1       |    |
| GF002  | 2       |    |
| GF003  | 3       |    |
| GF004  | 4       |   |
| GF005  | 5       |  |
| GF006  | 6       |  |
| GF007  | 7       |  |
| GF008  | 8       |  |

| SAMPLE | REG NO. | SAMPLE PHOTO                                                                        |
|--------|---------|-------------------------------------------------------------------------------------|
| GF009  | 9       |    |
| GF010  | 10      |    |
| GF011  | 11      |    |
| GF012  | 13      |   |
| GF013  | 14      |  |
| GF014  | 15      |  |
| GF015  | 17      |  |
| GF016  | 18      |  |

| SAMPLE | REG NO. | SAMPLE PHOTO                                                                        |
|--------|---------|-------------------------------------------------------------------------------------|
| GF017  | 19      |    |
| GF018  | 20      |    |
| GF019  | 21      |    |
| GF020  | 22      |    |
| GF021  | 23      |   |
| GF022  | 24      |  |
| GF023  | 25      |  |
| GF024  | 26      |  |
| GF025  | 27      |  |

| SAMPLE | REG NO. | SAMPLE PHOTO                                                                        |
|--------|---------|-------------------------------------------------------------------------------------|
| GF026  | 28      |    |
| GF027  | 29      |    |
| GF028  | 30      |    |
| GF029  | 31      |    |
| GF030  | 32      |   |
| GF031  | 33      |  |
| GF032  | 34      |  |
| GF033  | 35      |  |
| GF034  | 36      |  |

| SAMPLE | REG NO. | SAMPLE PHOTO                                                                        |
|--------|---------|-------------------------------------------------------------------------------------|
| GF035  | 37      |    |
| GF036  | 38      |    |
| GF037  | 39      |    |
| GF038  | 40      |   |
| GF039  | 41      |  |
| GF040  | 42      |  |
| GF041  | 43      |  |



| SAMPLE | REG NO. | SAMPLE PHOTO                                                                        |
|--------|---------|-------------------------------------------------------------------------------------|
| GF042  | 44      |    |
| GF043  | 46      |    |
| GF044  | 47      |    |
| GF045  | 48      |   |
| GF046  | 49      |  |
| GF047  | 50      |  |
| GF048  | 51      |  |
| GF049  | 52      |  |

| SAMPLE | REG NO. | SAMPLE PHOTO                                                                        |
|--------|---------|-------------------------------------------------------------------------------------|
| GF050  | 53      |    |
| GF051  | 54      |    |
| GF052  | 55      |    |
| GF053  | 56      |   |
| GF054  | 57      |  |
| GF055  | 58      |  |
| GF056  | 59      |  |
| GF057  | 60      |  |

| SAMPLE | REG NO. | SAMPLE PHOTO                                                                        |
|--------|---------|-------------------------------------------------------------------------------------|
| GF058  | 61      |    |
| GF059  | 62      |    |
| GF060  | 63      |    |
| GF061  | 64      |    |
| GF062  | 65      |   |
| GF063  | 66      |  |
| GF064  | 67      |  |
| GF065  | 68      |  |



| SAMPLE | REG NO. | SAMPLE PHOTO                                                                        |
|--------|---------|-------------------------------------------------------------------------------------|
| GF066  | 69      |    |
| GF067  | 70      |    |
| GF068  | 71      |    |
| GF069  | 72      |   |
| GF070  | 73      |  |
| GF071  | 74      |  |
| GF072  | 75      |  |

| SAMPLE | REG NO. | SAMPLE PHOTO                                                                        |
|--------|---------|-------------------------------------------------------------------------------------|
| GF073  | 76      |    |
| GF074  | 77      |    |
| GF075  | 78      |    |
| GF076  | 79      |   |
| GF077  | 80      | No photo                                                                            |
| GF078  | 81      |  |
| GF079  | 82      |  |
| GF080  | 83      |  |

| SAMPLE | REG NO.  | SAMPLE PHOTO                                                                        |
|--------|----------|-------------------------------------------------------------------------------------|
| GF081  | 84       |    |
| GF082  | 85       |    |
| GF083  | 86       |    |
| GF084  | 87       |   |
| GF085  | 88       |  |
| GF086  | no photo |                                                                                     |
| GF087  | no photo |                                                                                     |
| GF088  |          |  |
| GF089  | 1        |  |

| SAMPLE | REG NO. | SAMPLE PHOTO                                                                        |
|--------|---------|-------------------------------------------------------------------------------------|
| GF090  | 2       |    |
| GF091  | 4       |    |
| GF092  | 5       |    |
| GF093  | 6       |   |
| GF094  | 7       |  |
| GF095  | 8       |  |
| GF096  | 9       |  |

| SAMPLE | REG NO. | SAMPLE PHOTO                                                                        |
|--------|---------|-------------------------------------------------------------------------------------|
| GF097  | 10      |    |
| GF098  | 14      |    |
| GF099  | 15      |    |
| GF100  | 16      |   |
| GF101  | 17      |  |
| GF102  | 18      |  |
| GF103  | 1       |  |



| SAMPLE | REG NO. | SAMPLE PHOTO                                                                        |
|--------|---------|-------------------------------------------------------------------------------------|
| GF104  | 2       |    |
| GF105  | 3       |    |
| GF106  | 4       |    |
| GF107  | 8       |   |
| GF108  | 9       |  |
| GF109  | 10      |  |
| GF110  | 13      |  |
| GF111  | 14      | No photo                                                                            |
| GF112  | 16      |  |

| SAMPLE | REG NO. | SAMPLE PHOTO                                                                        |
|--------|---------|-------------------------------------------------------------------------------------|
| GF113  | 18      |    |
| GF114  | 21      |    |
| GF115  | 23      | no photo                                                                            |
| GF116  | 26      |    |
| GF117  | 27      |    |
| GF118  | 29      |  |
| GF119  | 30      |  |
| GF120  | 32      |  |
| GF121  | 34      |  |

| SAMPLE | REG NO. | SAMPLE PHOTO                                                                        |
|--------|---------|-------------------------------------------------------------------------------------|
| GF122  | 36      |    |
| GF123  | 37      |    |
| GF124  | 38      |    |
| GF125  | 39      |    |
| GF126  | 41      |   |
| GF127  | 42      | No photo                                                                            |
| GF128  | 43      |  |
| GF129  | 44      |  |
| GF130  | 45      |  |
| GF131  | 46      | No photo                                                                            |

| SAMPLE | REG NO. | SAMPLE PHOTO                                                                        |
|--------|---------|-------------------------------------------------------------------------------------|
| GF132  | 47      |    |
| GF133  | 48      |    |
| GF134  | 49      |    |
| GF135  | 50      |   |
| GF136  | 51      |  |
| GF137  | 52      |  |
| GF138  | 53      |  |
| GF139  | 55      |  |



| SAMPLE | REG NO. | SAMPLE PHOTO                                                                        |
|--------|---------|-------------------------------------------------------------------------------------|
| GF140  | 56      |    |
| GF141  | 57      |    |
| GF142  | 61      |    |
| GF143  | 63      |    |
| GF144  | 58      |  |
| GF145  | 60      |  |
| GF146  | 62      |  |
| GF147  | 5       |  |



| SAMPLE | REG NO. | SAMPLE PHOTO                                                                        |
|--------|---------|-------------------------------------------------------------------------------------|
| GF148  | 6       |    |
| GF149  | 7       |    |
| GF150  | 11      |    |
| GF151  | 12      |   |
| GF152  | 15      |  |
| GF153  | 17      |  |
| GF154  | 19      |  |

| SAMPLE | REG NO. | SAMPLE PHOTO                                                                        |
|--------|---------|-------------------------------------------------------------------------------------|
| GF155  | 20      |    |
| GF156  | 22      |    |
| GF157  | 24      |   |
| GF158  | 25      |  |
| GF159  | 28      |  |
| GF160  | 31      |  |
| GF161  | 33      |  |

| SAMPLE | REG NO. | SAMPLE PHOTO                                                                        |
|--------|---------|-------------------------------------------------------------------------------------|
| GF162  | 35      |    |
| GF163  | 40      |    |
| GF164  | 54      |    |
| GF165  | 59      |   |
| GF166  | 3       |  |
| GF167  | duo1    | no photo                                                                            |
| GF168  | duo2    | no photo                                                                            |
| GF169  | duo3    | no photo                                                                            |
| GF170  | duo4    | no photo                                                                            |
| GF171  | duo6-1  | no photo                                                                            |
| GF172  | 4       |  |
| GF173  | 5       |  |

| SAMPLE | REG NO. | SAMPLE PHOTO                                                                         |
|--------|---------|--------------------------------------------------------------------------------------|
| GF174  | 23      |     |
| GF175  | 21      |     |
| GF176  | 22      |     |
| GF177  | 24      |     |
| GF178  | 25      |    |
| GF179  | seq1    | no photo                                                                             |
| GF180  | seq2    | no photo                                                                             |
| GF182  | tb2     |   |
| GF183  | tb3     |   |
| GF184  | tb4     |  |



| SAMPLE | REG NO. | SAMPLE PHOTO                                                                        |
|--------|---------|-------------------------------------------------------------------------------------|
| GF185  | tb6     |   |
| GF186  | tb7     |   |
| GF187  | ZJPH1   |    |
| GF188  | ZJPH2   |   |
| GF189  | JSNJ1   |  |
| GF190  | JXSR1   |  |
| GF191  | JXXY1   |  |
| GF192  | HNXY1   |  |
| GF193  | HNZMD1  |  |
| GF194  | HLJHEB1 |  |



| SAMPLE | REG NO. | SAMPLE PHOTO                                                                      |
|--------|---------|-----------------------------------------------------------------------------------|
| GF195  | SDBZ1   |  |
| GF196  | FJSM1   |  |
| GF197  | FJSM2   |  |
| GF198  | FJLY1   |  |
| GF199  | FJZN1   |  |
| GF200  | FJZN2   |  |
| GF201  | BYJ01   | No photo                                                                          |
| GF202  | BYJ02   | No photo                                                                          |
