# Supplementary material
Source: PubMed Central journal article supplement (PMC7703540)
Supplement: pnas.2005545117.sd04.pdf [file pnas.2005545117.sd04.pdf]

Chr1\_7675000-8455000-1

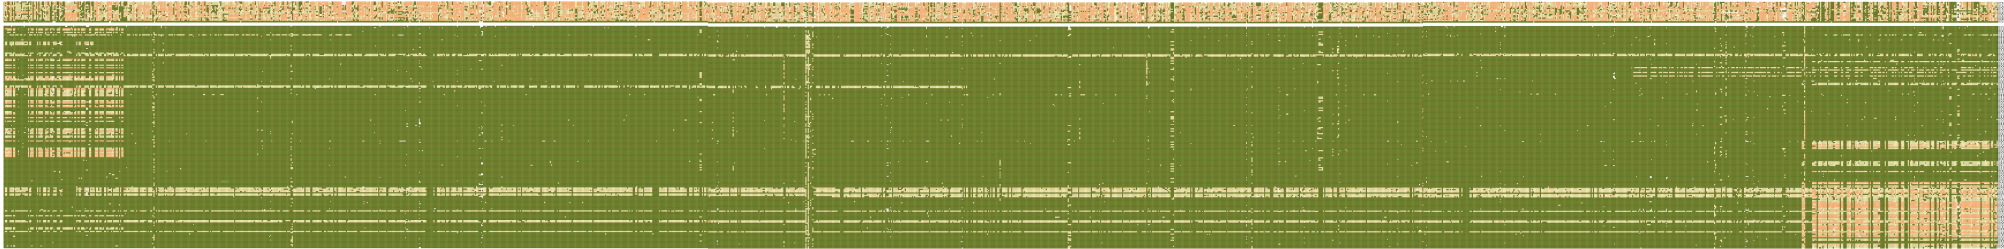

7727000-8377000

- Cau.A01G0002820(eif3f)
- Cau.A01G0002830(PREDICTED: FERM domain-containing protein 7-like)
- Cau.A01G0002840(dachb)
- Cau.A01G0002850(dachb)
- Cau.A01G0002860(PREDICTED: LOW QUALITY PROTEIN: protein canopy homolog 3-like)
- Cau.A01G0002870(PREDICTED: short transient receptor potential channel 5-like)
- Cau.A01G0002880(hypothetical protein cypCar\_00031289)
- Cau.A01G0002890(hypothetical protein cypCar\_00031288)
- Cau.A01G0002900(hypothetical protein cypCar\_00031287, partial)
- Cau.A01G0002910(PREDICTED: mitochondrial pyruvate carrier 2-like)
- Cau.A01G0002920(PREDICTED: sodium/potassium-transporting ATPase subunit beta-233-like)
- Cau.A01G0002930(hypothetical protein cypCar\_00016728)
- Cau.A01G0002940(PREDICTED: cilia- and flagella-associated protein 221)

- Cau.A01G0002950(PREDICTED: interleukin-10 receptor subunit beta-like)
- Cau.A01G0002960(dmd)
- Cau.A01G0002970(dmd)
- Cau.A01G0002980(PREDICTED: uncharacterized protein LOC107723193 isoform X3)
- Cau.A01G0002990(PREDICTED: small kinetochore-associated protein-like)
- Cau.A01G0003000(PREDICTED: protein sidekick-1-like)
- Cau.A01G0003010(hypothetical protein cypCar\_00019756, partial)
  
- Cau.A01G0003030(PREDICTED: protein sidekick-1-like)
- Cau.A01G0003040(PREDICTED: carbohydrate sulfotransferase 12-like)
- Cau.A01G0003050(phosphorylase b kinase gamma catalytic chain, skeletal muscle/heart isoform-like)
- Cau.A01G0003060(PREDICTED: BRCA1-associated ATM activator 1-like)
- Cau.A01G0003070(PREDICTED: carbohydrate sulfotransferase 12-like)

Chr1\_24695000-25845000-1

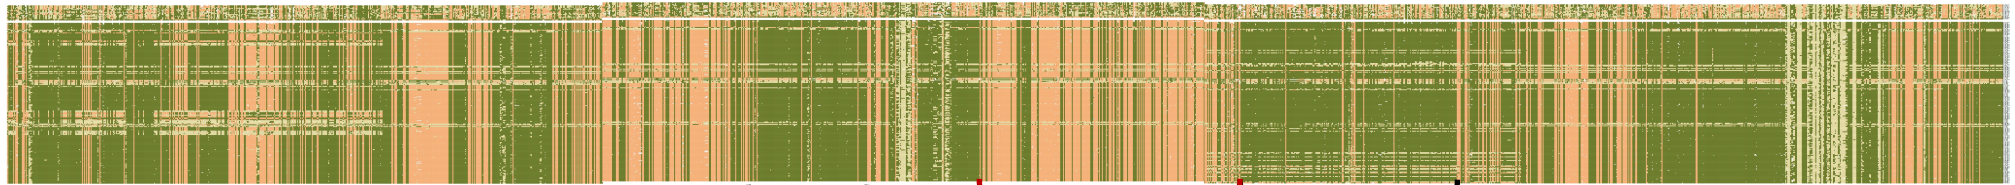

24925000-24950000

Cau.A01G0008490(hypothetical protein cypCar\_00012495)

Cau.A01G0008500(PREDICTED: N-acetylgalactosaminyltransferase 7 isoform X1)

Cau.A01G0008510(high mobility group protein B2)

25116700-25193300

25250000-25400000

25400000-25537600

Cau.A01G0008610(PREDICTED: vascular endothelial growth factor C-like)

Cau.A01G0008620(PREDICTED: vascular endothelial growth factor C-like)

Cau.A01G0008630(PREDICTED: vascular endothelial growth factor C-like)



Chr4\_13705000-14045000-1

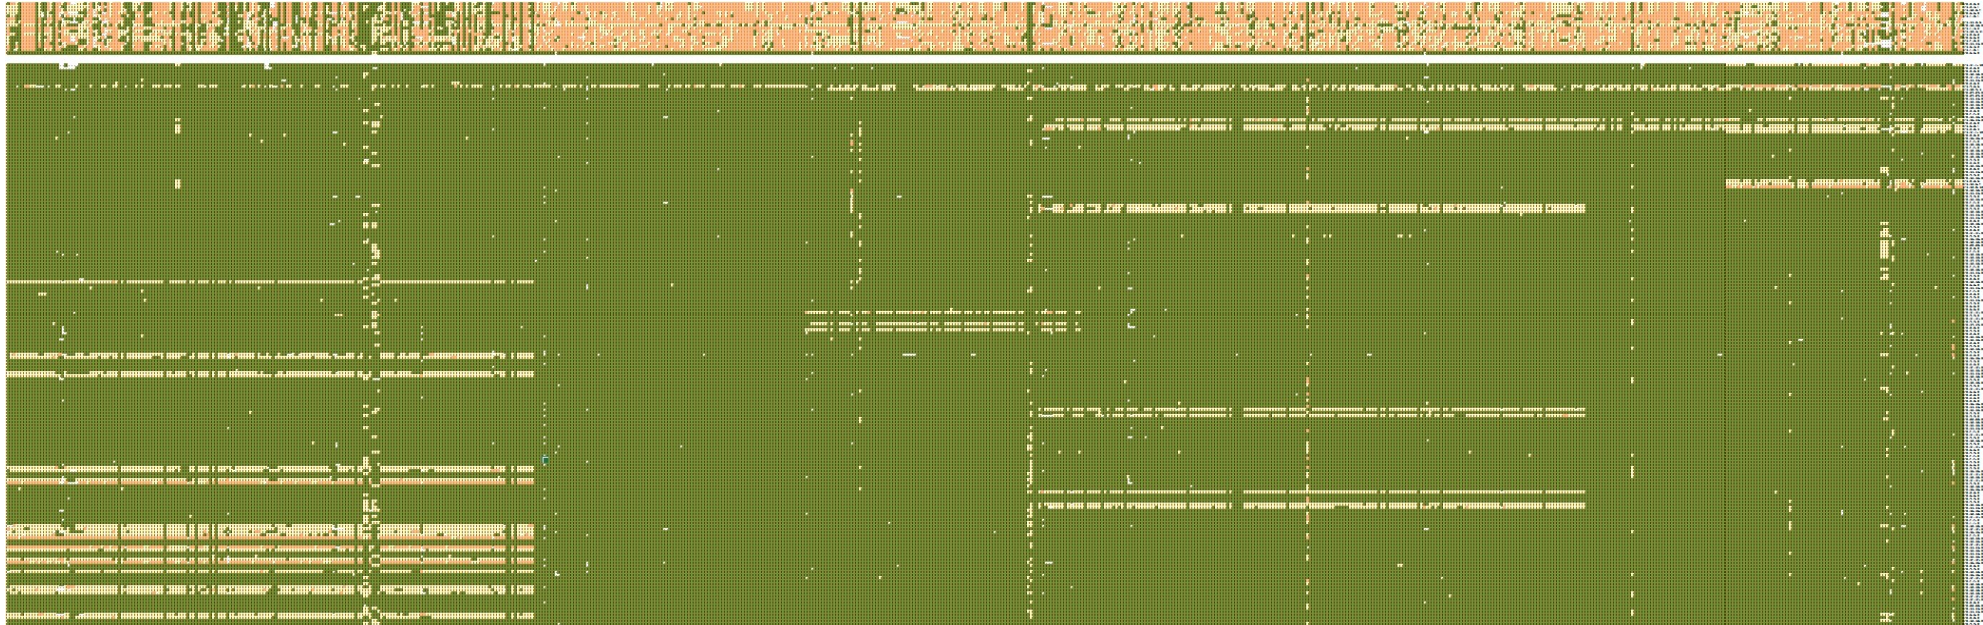

13795700-14045000

Cau.A04G0007000(nav3)

Cau.A04G0007010

Cau.A04G0007020(nav3)

Cau.A04G0007040(nav3)



Chr4\_24295000-24685000-01

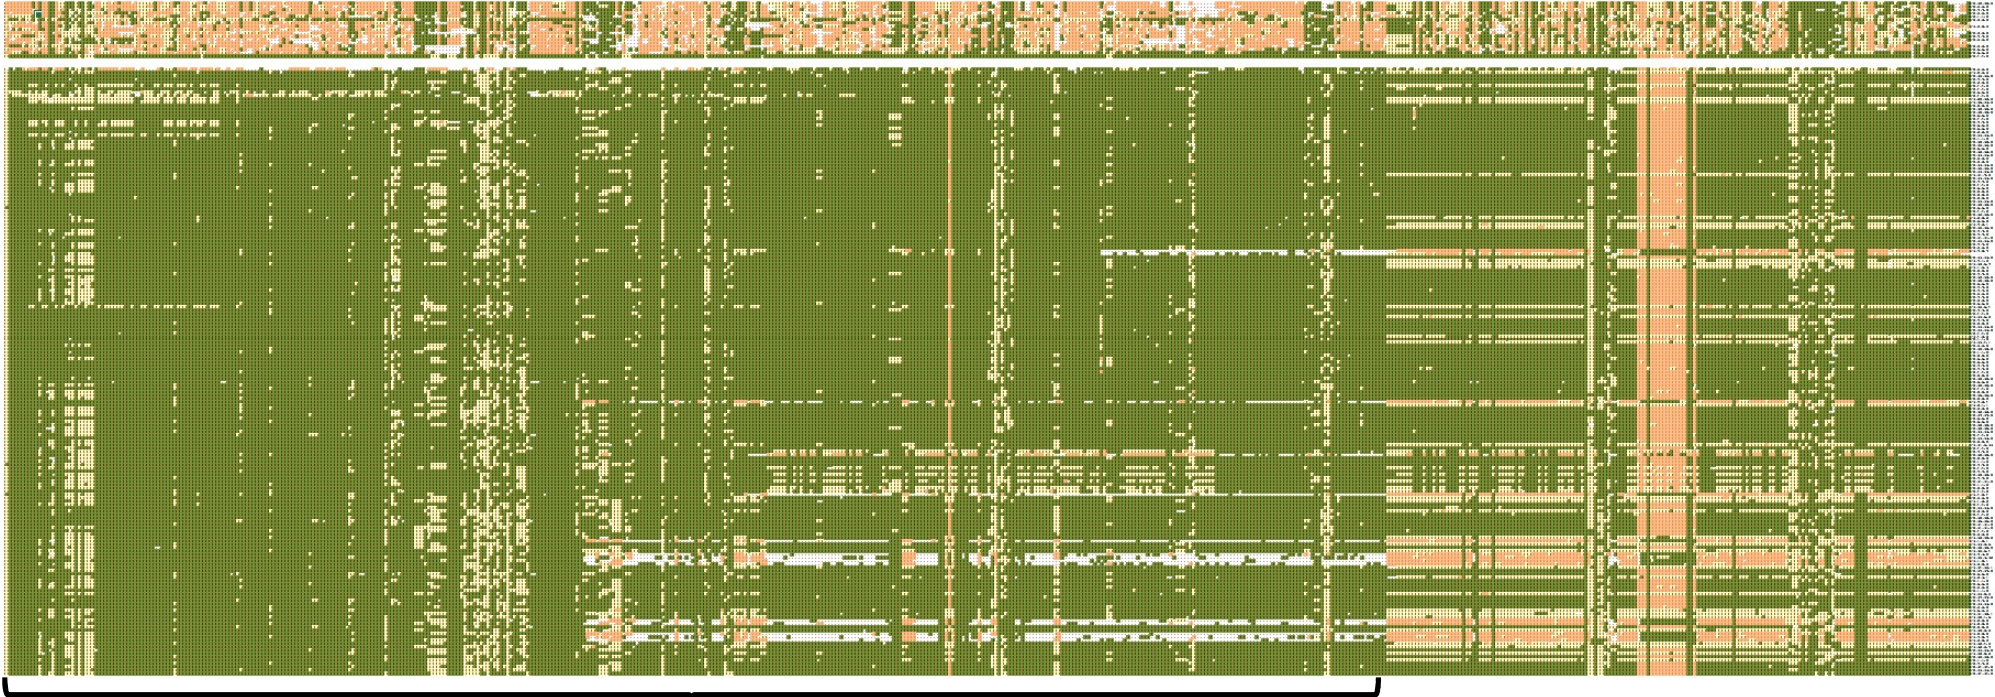

24295000-24555000

Cau.A04G0010900(PREDICTED: bifunctional apoptosis regulator-like)

Cau.A04G0010910(hypothetical protein cypCar\_00048350, partial)

Cau.A04G0010940(PREDICTED: complement C3-like)



Chr6\_26005000-26485000-01

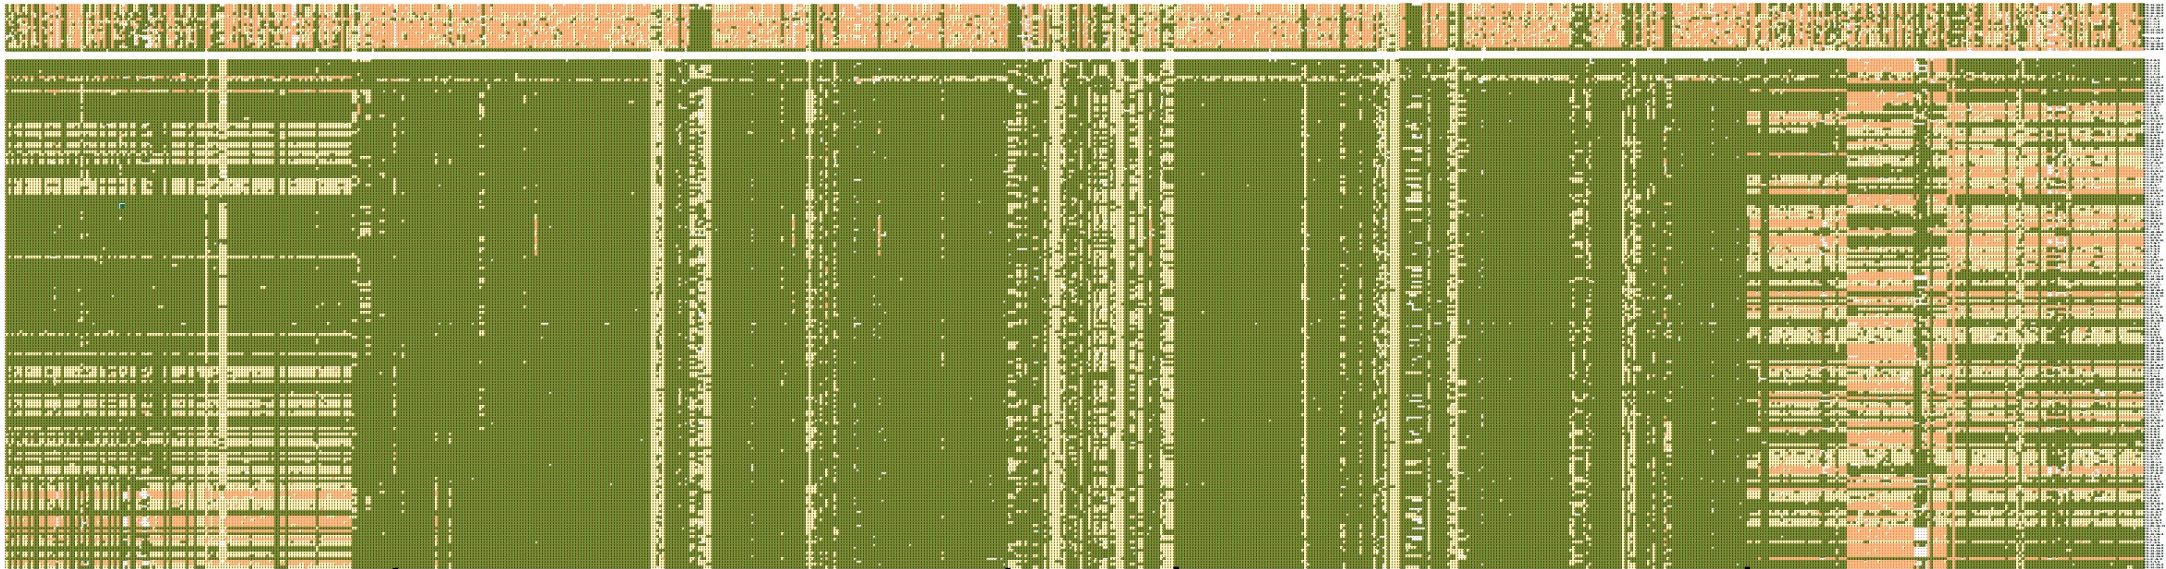

26125000-26185000

Cau.A06G0010260(PREDICTED: uncharacterized protein LOC109073807 isoform X1)  
Cau.A06G0010280(hypothetical protein cypCar\_0003518)  
Cau.A06G0010290(uxs1)  
Cau.A06G0010300(PREDICTED: integral membrane protein GPR180)  
Cau.A06G0010310(hypothetical protein cypCar\_00031278)  
Cau.A06G0010330(PREDICTED: uncharacterized protein LOC106572013 isoform X1)

26260000-26290000

Cau.A06G0010410(PREDICTED: uncharacterized protein LOC106113030)  
Cau.A06G0010420(arhgap18)  
Cau.A06G0010430(PREDICTED: protein phosphatase 1 regulatory inhibitor subunit 16B-like)

26335000-26365000

Cau.A06G0010450(PREDICTED: protein phosphatase 1 regulatory inhibitor subunit 16B-like)  
Cau.A06G0010460(PREDICTED: protein FAM210A-like isoform X2)  
Cau.A06G0010470(PREDICTED: LOW QUALITY PROTEIN: serine hydroxymethyltransferase, mitochondrial)



Chr7\_17885000-18505000-01

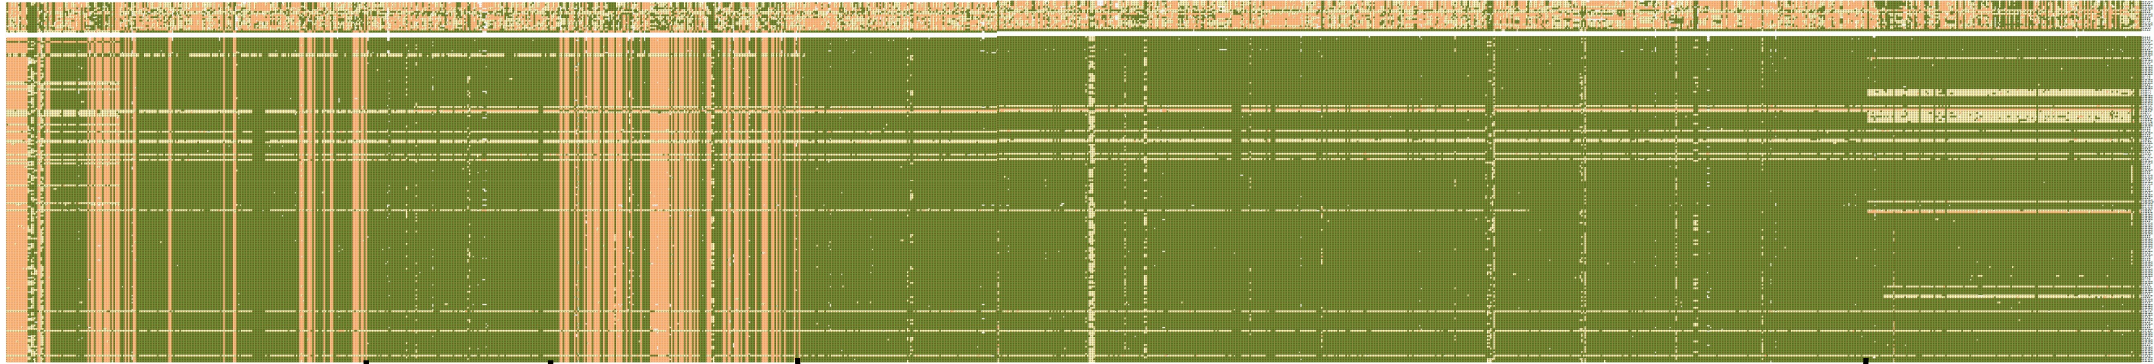

17985000-18085000

- Cau.A07G0007910(PREDICTED: FH1/FH2 domain-containing protein 1-like isoform X1)
- Cau.A07G0007920(hypothetical protein cypCar\_00003060)
- Cau.A07G0007930(PREDICTED: uncharacterized protein LOC107689976 isoform X3)
- Cau.A07G0007940(PREDICTED: rho guanine nucleotide exchange factor 40-like isoform X1)
- Cau.A07G0007950(PREDICTED: uncharacterized protein LOC107689976 isoform X3)
- Cau.A07G0007960(PREDICTED: leukotriene B4 receptor 1-like)

18165000-18485000

- Cau.A07G0008010(hypothetical protein cypCar\_00017207, partial)
- Cau.A07G0008020(PREDICTED: nuclear factor of activated T-cells, cytoplasmic 3-like)
- Cau.A07G0008030(hypothetical protein cypCar\_00017208)
- Cau.A07G0008040(similar to galanin receptor type 1)
- Cau.A07G0008050(hypothetical protein cypCar\_00038255)
- Cau.A07G0008060(agrp)
- Cau.A07G0008080(atp6v0d1)
- Cau.A07G0008090(hydroxysteroid 17-beta dehydrogenase 2)
- Cau.A07G0008100(PREDICTED: probable palmitoyltransferase ZDHHC1 isoform X1)
- Cau.A07G0008120(hypothetical protein cypCar\_00019328, partial)
- Cau.A07G0008130(dpep2)
- Cau.A07G0008140(PREDICTED: solute carrier family 12 member 4-like isoform X2)
- Cau.A07G0008150(PREDICTED: sodium-dependent noradrenaline transporter-like)



Chr9\_27525000-28495000-01

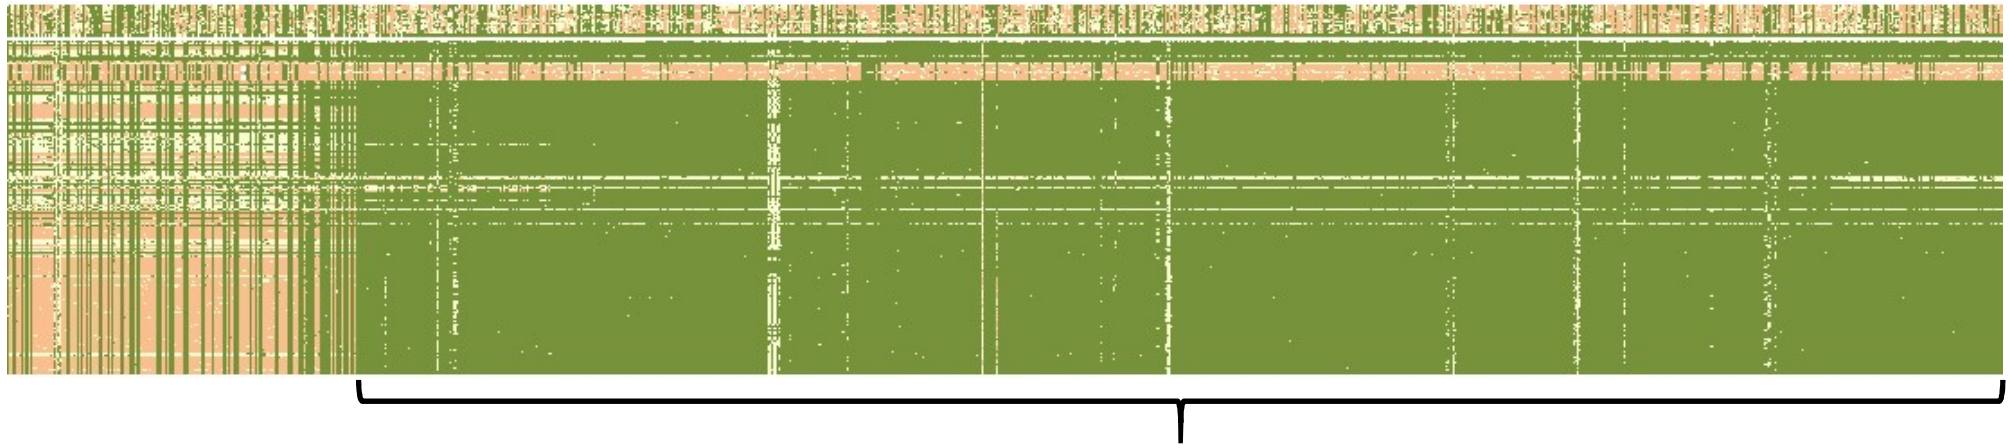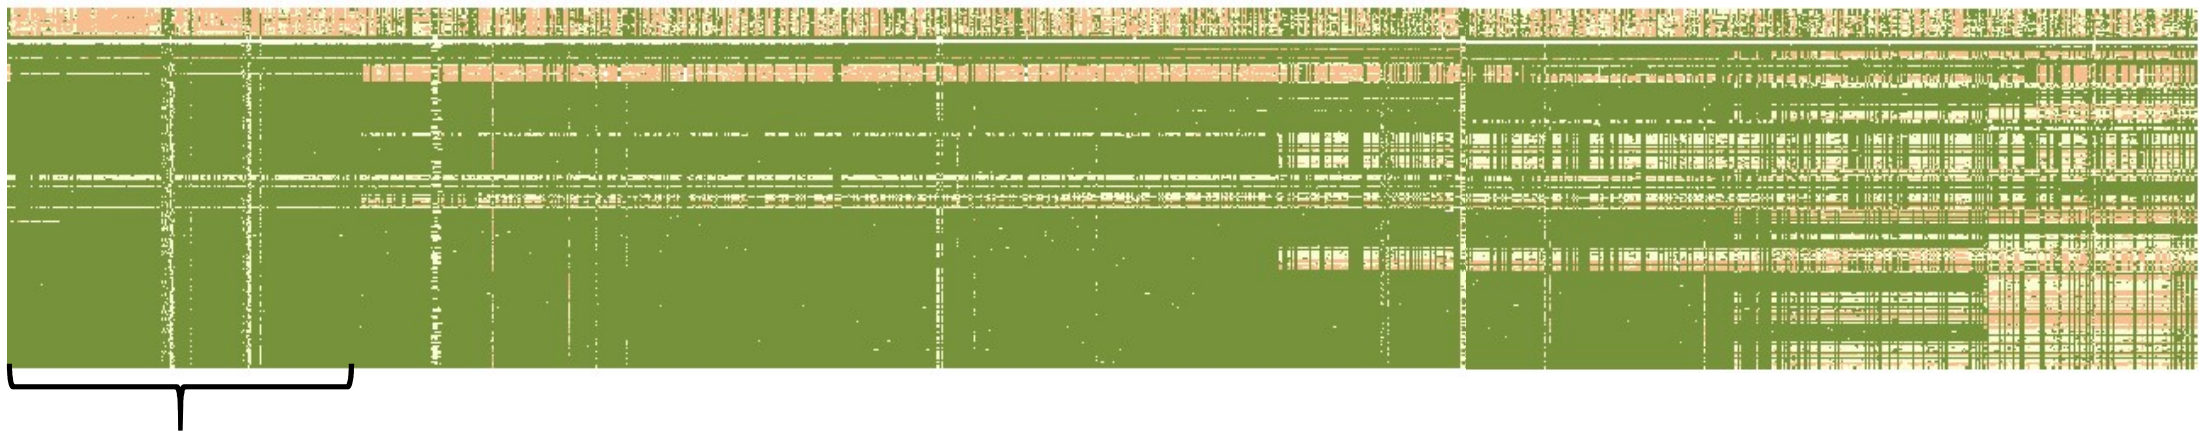

27990000-28100000

Cau.A09G0011590(hypothetical protein cypCar\_00032736 )

Cau.A09G0011500-Cau.A09G0011590

Chr10\_24565000-24765000-01

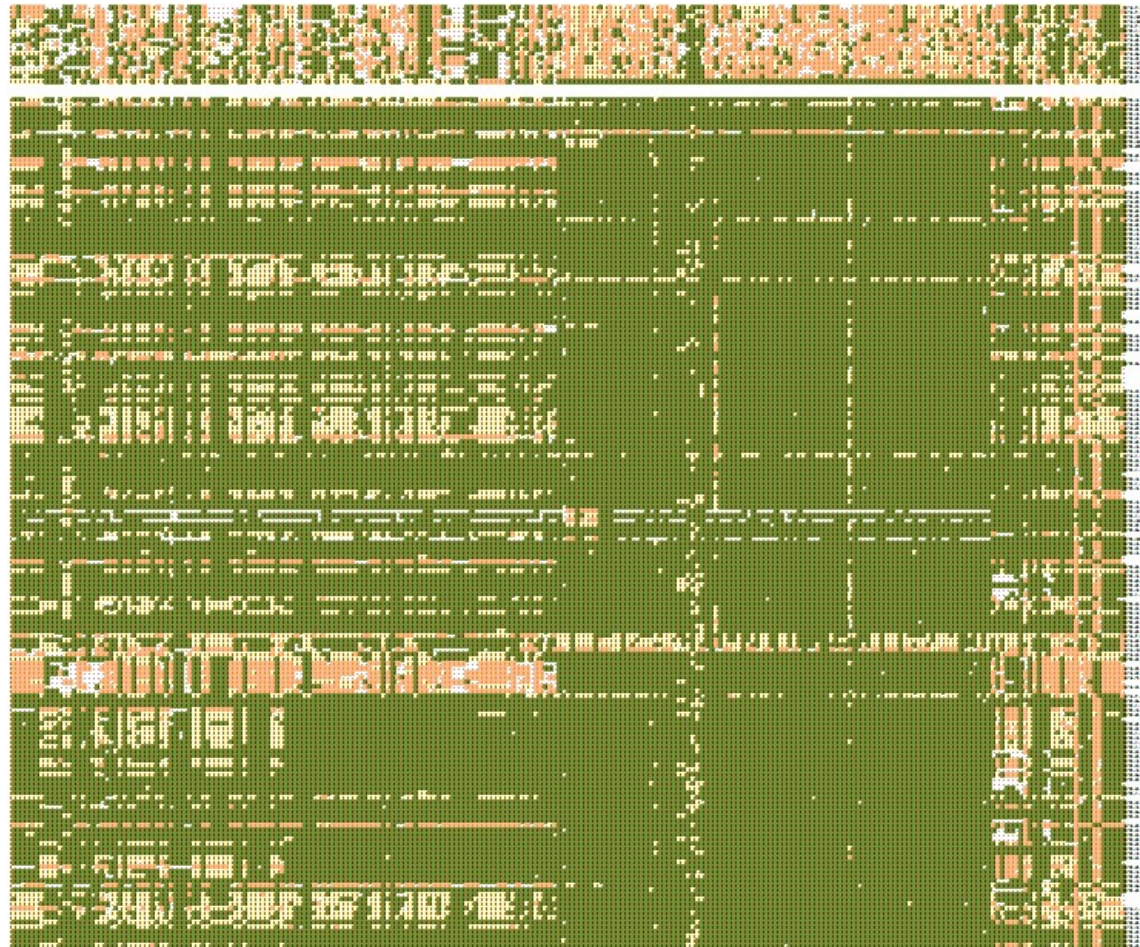

24692500-24742500 Cau.A10G0011470(PREDICTED: set1/Ash2 histone methyltransferase complex subunit ASH2-like isoform X1)  
Cau.A10G0011480(PREDICTED: G protein-coupled receptor kinase 5-like)



Chr12\_20850000-21215000-1

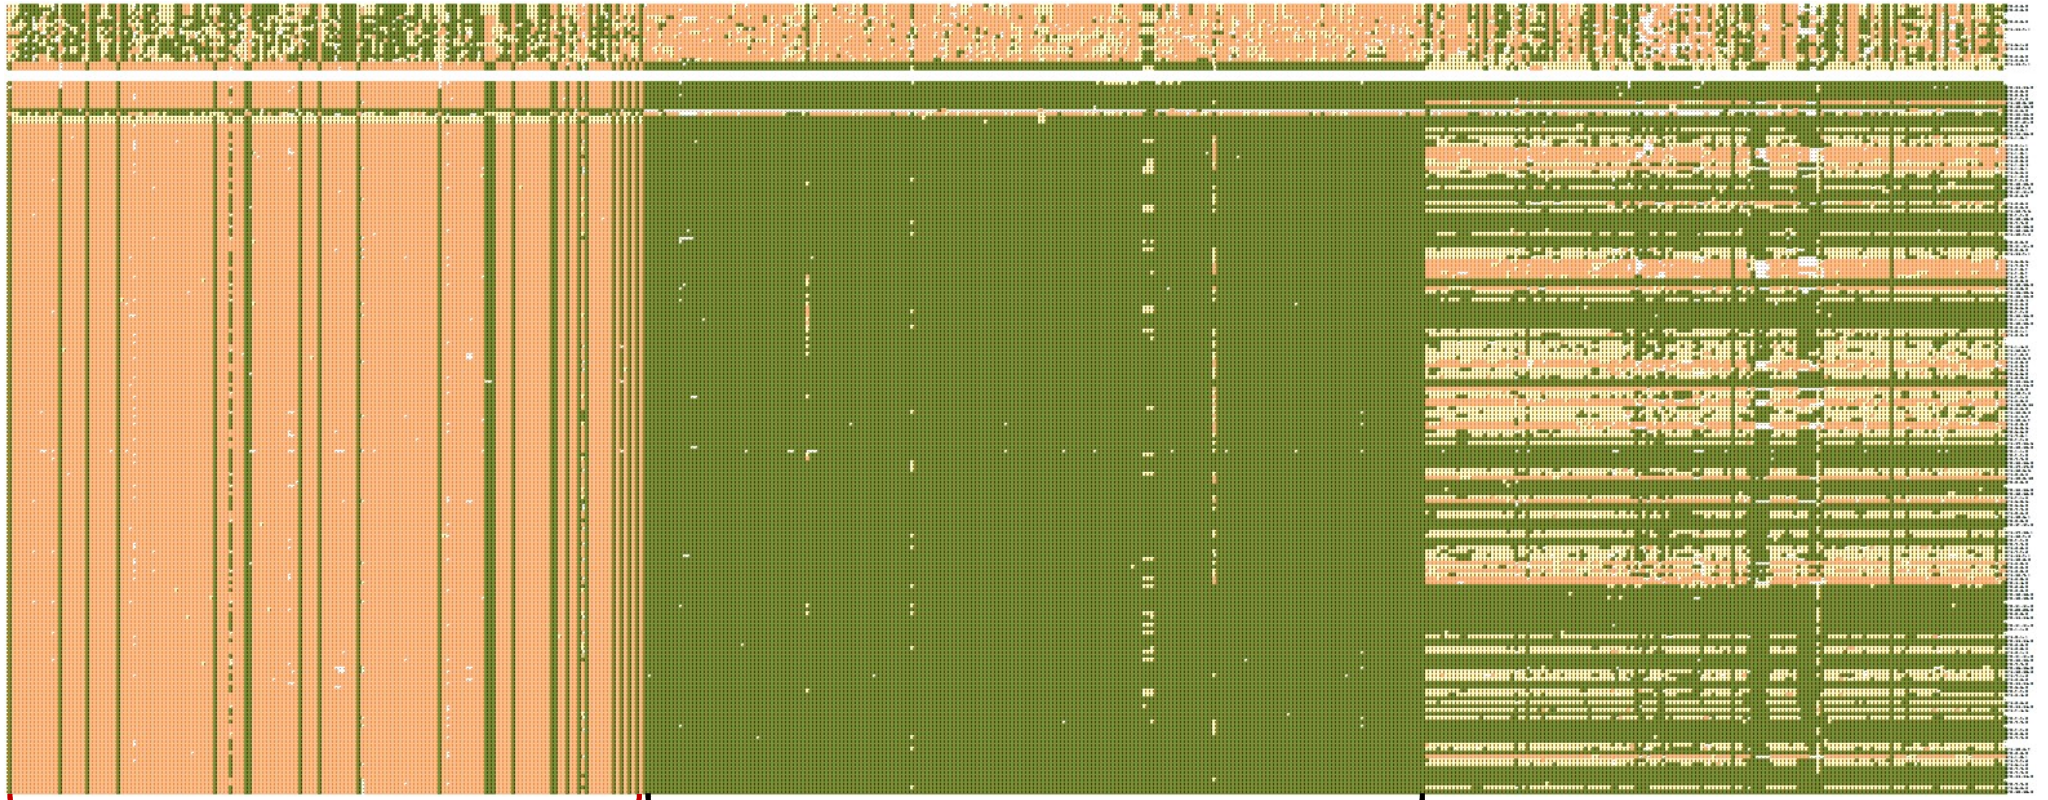

20850000-20965580

20965580-21111600

Cau.A12G0008850(PREDICTED: thrombospondin-2-like isoform X1)

Cau.A12G0009120(PREDICTED: syntaxin-binding protein 4 isoform X1)



Chr14\_9525000-10035000-01

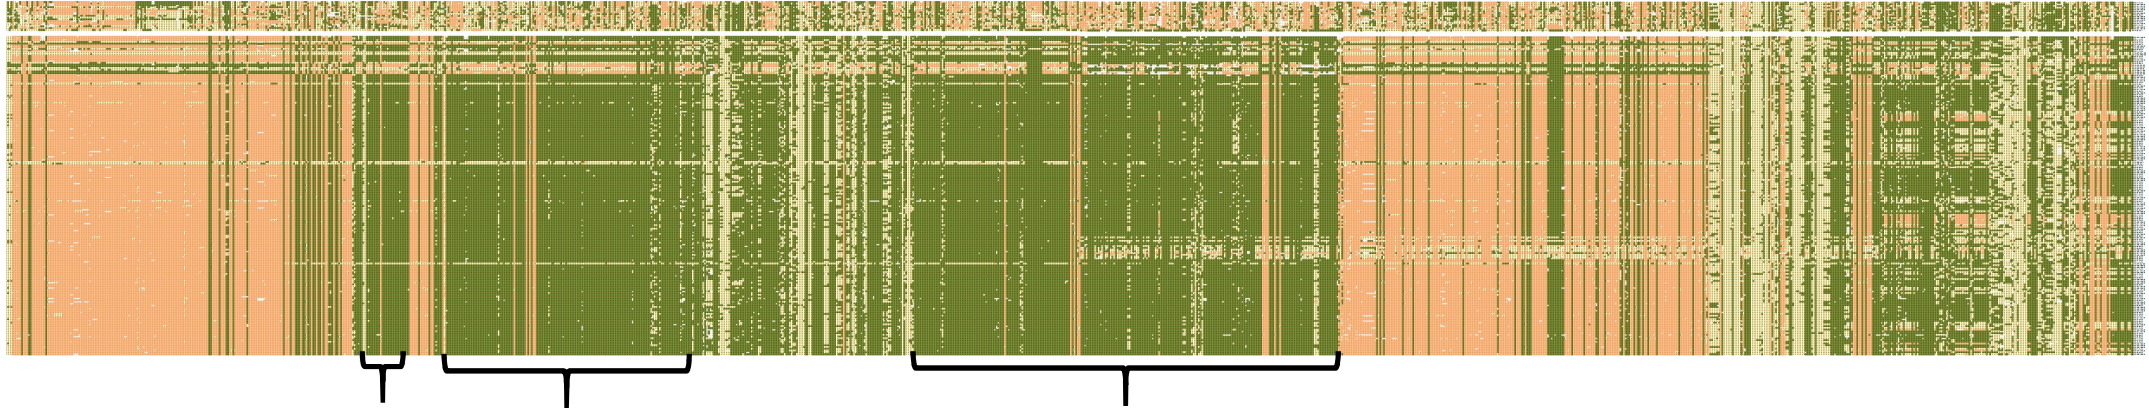

9604700-9620700

Cau.A14G0003520(PREDICTED:  
protocadherin gamma-A4-like )

9630700-9686700

Cau.A14G0003530(PREDICTED: LOW  
QUALITY PROTEIN: protein  
diaphanous homolog 1-like )

9742700-9838700

Cau.A14G0003570(PREDICTED: protein no-on-transient A-like )  
Cau.A14G0003580(PREDICTED: short transient receptor potential channel 7-like )  
Cau.A14G0003600  
Cau.A14G0003610(PREDICTED: protein no-on-transient A-like )  
Cau.A14G0003620(PREDICTED: short transient receptor potential channel 7-like )



Chr14\_16465000-17035000-01

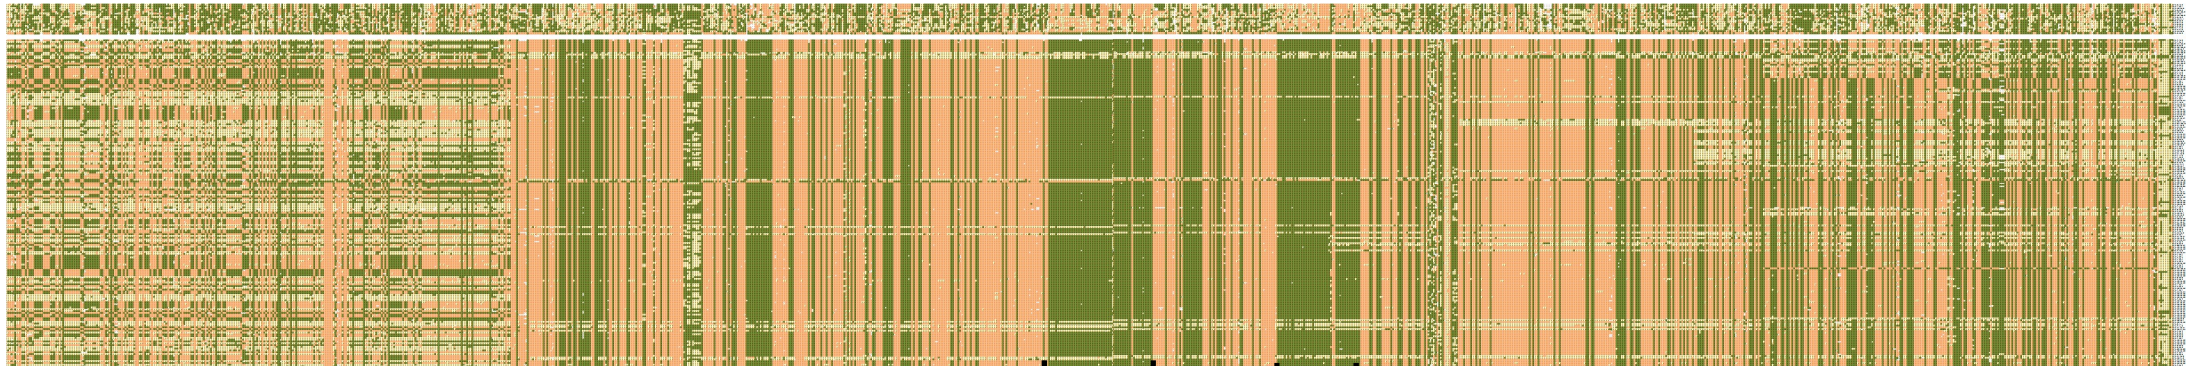

16750000-16777000

Cau.A14G0007080(fermt3b)

Cau.A14G0007090(PREDICTED: O-acetyl-ADP-ribose  
deacetylase MACROD1-like )

Cau.A14G0007100(flrt1b)

16813000-16831000

Cau.A14G0007120(PREDICTED: girdin-like )

Chr15\_15965000-16275000-1

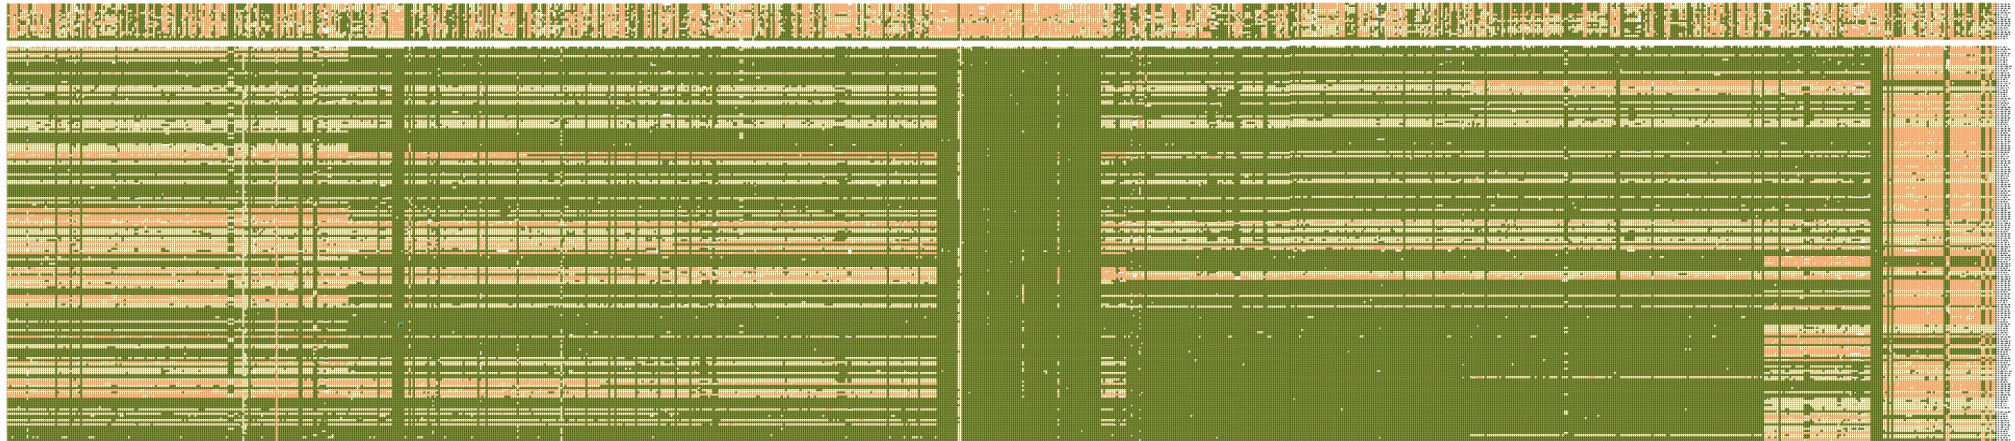

16115000-16136000

**Cau.A15G0006280**(PREDICTED: E3  
ubiquitin-protein ligase CBL-like)



Chr15\_24135000-24595000-1

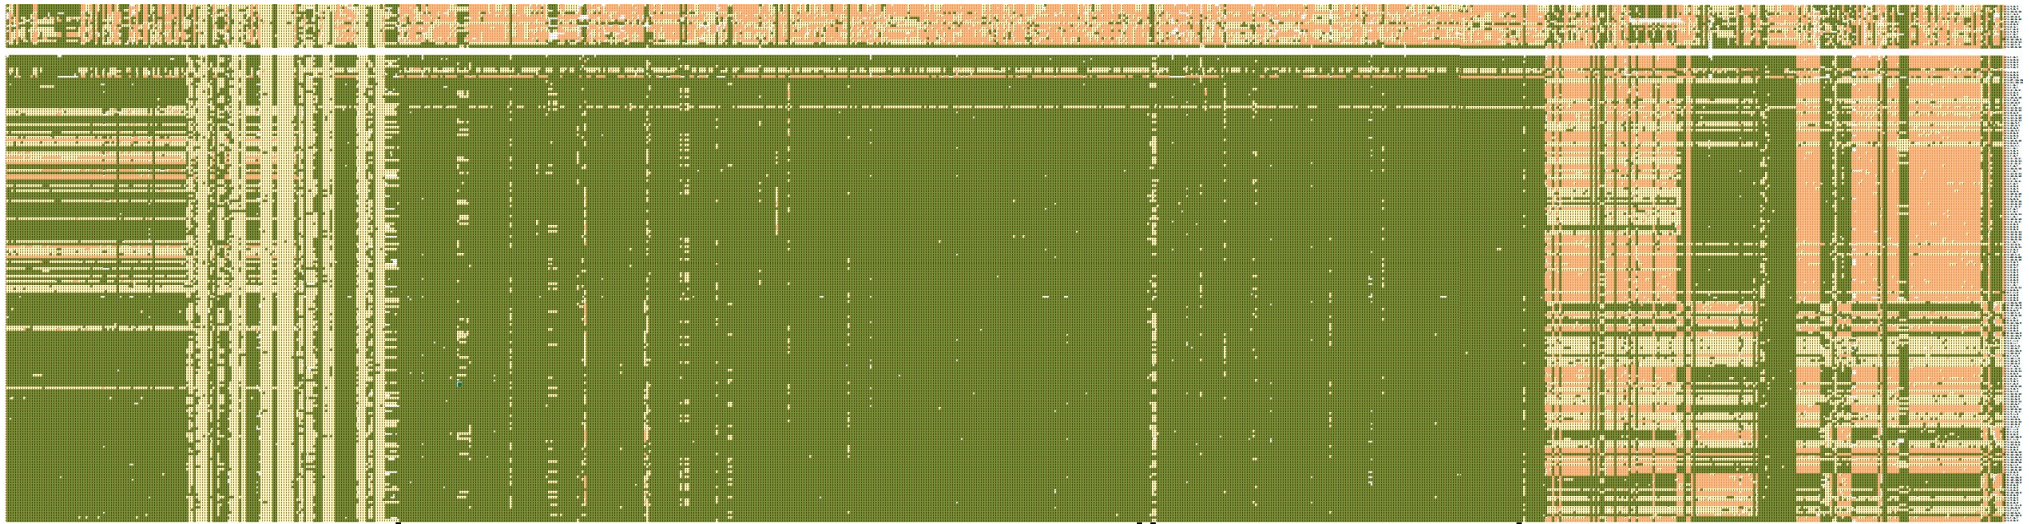

24227000-24396000

- Cau.A15G0010630(PREDICTED: chymotrypsinogen A-like)
- Cau.A15G0010640(PREDICTED: zinc finger and BTB domain-containing protein 32)
- Cau.A15G0010650(PREDICTED: IGF-like family receptor 1 isoform X1)
- Cau.A15G0010670(psenen)
- Cau.A15G0010680(heat shock protein, alpha-crystallin-related, b6)
- Cau.A15G0010690(proline and serine rich 3)
- Cau.A15G0010700(PREDICTED: protein lin-37 homolog)
- Cau.A15G0010710(PREDICTED: C3a anaphylatoxin chemotactic receptor-like )

24403000-24488000

- Cau.A15G0010740(PREDICTED: chymotrypsin-like protease CTRL-1)
- Cau.A15G0010750(PREDICTED: heat shock cognate 71 kDa protein-like isoform X2)
- Cau.A15G0010760(PREDICTED: TBC1 domain family member 15-like isoform X1)
- Cau.A15G0010770(uncharacterized protein LOC103028994)
- Cau.A15G0010780(PREDICTED: myelin-associated glycoprotein-like)

Chr17\_22415000-23275000-1

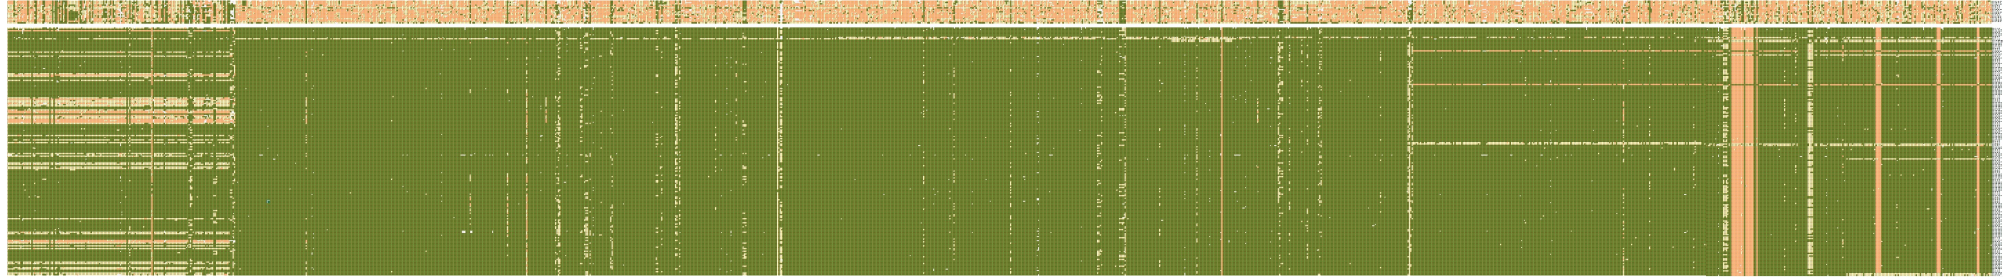

22515000-23160000

Cau.A17G0009630(PREDICTED: kinesin-like protein KIF26A isoform X1)

Cau.A17G0009640(PREDICTED: 60 kDa lysophospholipase isoform X4)

Cau.A17G0009650(ADP-ribosylation factor 6 isoform X1)

Cau.A17G0009670(PREDICTED: calpain-1 catalytic subunit-like)

Cau.A17G0009680(PREDICTED: calpain-1 catalytic subunit-like)

Cau.A17G0009690(hypothetical protein cypCar\_00039660)

Cau.A17G0009710(PREDICTED: complement component C1q receptor-like)

Cau.A17G0009720(PREDICTED:thrombomodulin)

Cau.A17G0009730(PREDICTED:susd4)

Cau.A17G0009740(PREDICTED:HHIP-like 2)

Cau.A17G0009750(PREDICTED: mitochondrial amidoxime-reducing component 1-like)

Cau.A17G0009760(PREDICTED:potassium channel subfamily K member 3-like)

Cau.A17G0009770(PREDICTED:ezrin-like)

Cau.A17G0009780(hypothetical protein cypCar\_00021684)

Cau.A17G0009790

Cau.A17G0009800(PREDICTED:transmembrane protein 206-like)

Cau.A17G0009810(PREDICTED: zinc finger protein 106-like isoform X3)

Cau.A17G0009820(PREDICTED: calpain-3-like isoform X1)

Cau.A17G0009830(PREDICTED: neutral alpha-glucosidase C-like isoform X1)

Cau.A17G0009840(PREDICTED: tau-tubulin kinase 2-like isoform X1)

Cau.A17G0009850(protein TMED8 isoform X1)

Cau.A17G0009860(PREDICTED: kelch domain-containing protein 2-like)

Cau.A17G0009870(PREDICTED: methylmalonate-semialdehyde dehydrogenase [acylating], mitochondrial-like isoform X1)

Cau.A17G0009880(entpd5a)

Cau.A17G0009890(coq6)

Cau.A17G0009900(PREDICTED: protein FAM161B-like)

Cau.A17G0009910(PREDICTED: neuroglobin)

Cau.A17G0009920(PREDICTED: calcium permeable stress-gated cation channel 1 isoform X2)

Cau.A17G0009930(PREDICTED: palmitoyltransferase ZDHHC22-like)

Cau.A17G0009940(hypothetical protein cypCar\_00006873)

Cau.A17G0009950(placenta growth factor isoform X2)

Cau.A17G0009960(PREDICTED: solute carrier family 35 member F4-like)

Cau.A17G0009970(solute carrier family 35 member F4 isoform X2)

Cau.A17G0009980(PREDICTED: N-alpha-acetyltransferase 30-like isoform X1)

Cau.A17G0009990(PREDICTED: AP-5 complex)



Chr19\_15505000-16045000-1

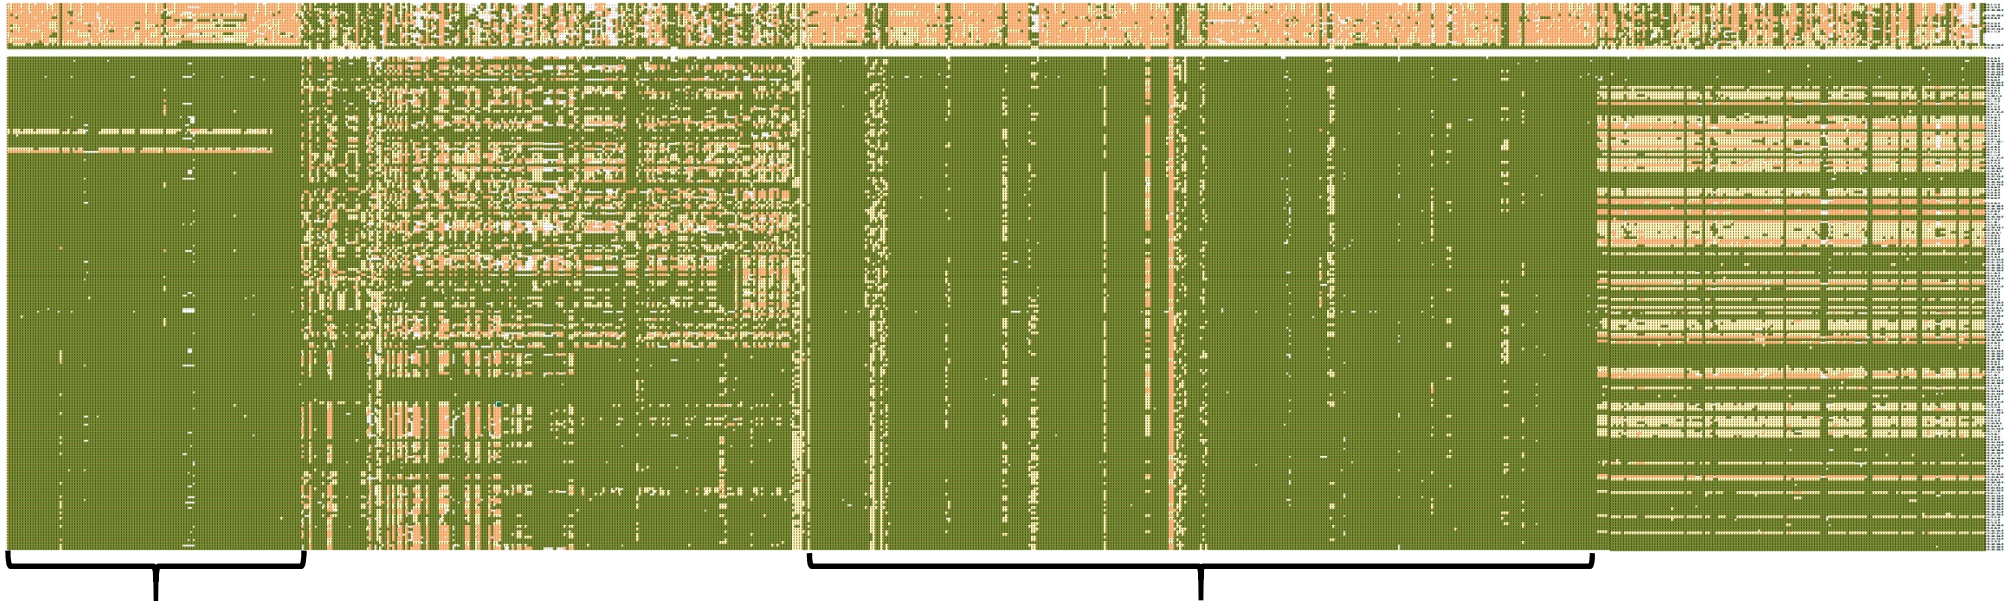

15505000-15586000

15721000-15937000

**Cau.A19G0007150**(PREDICTED: contactin-associated protein-like 5)



Chr19\_16625000-16995000-1

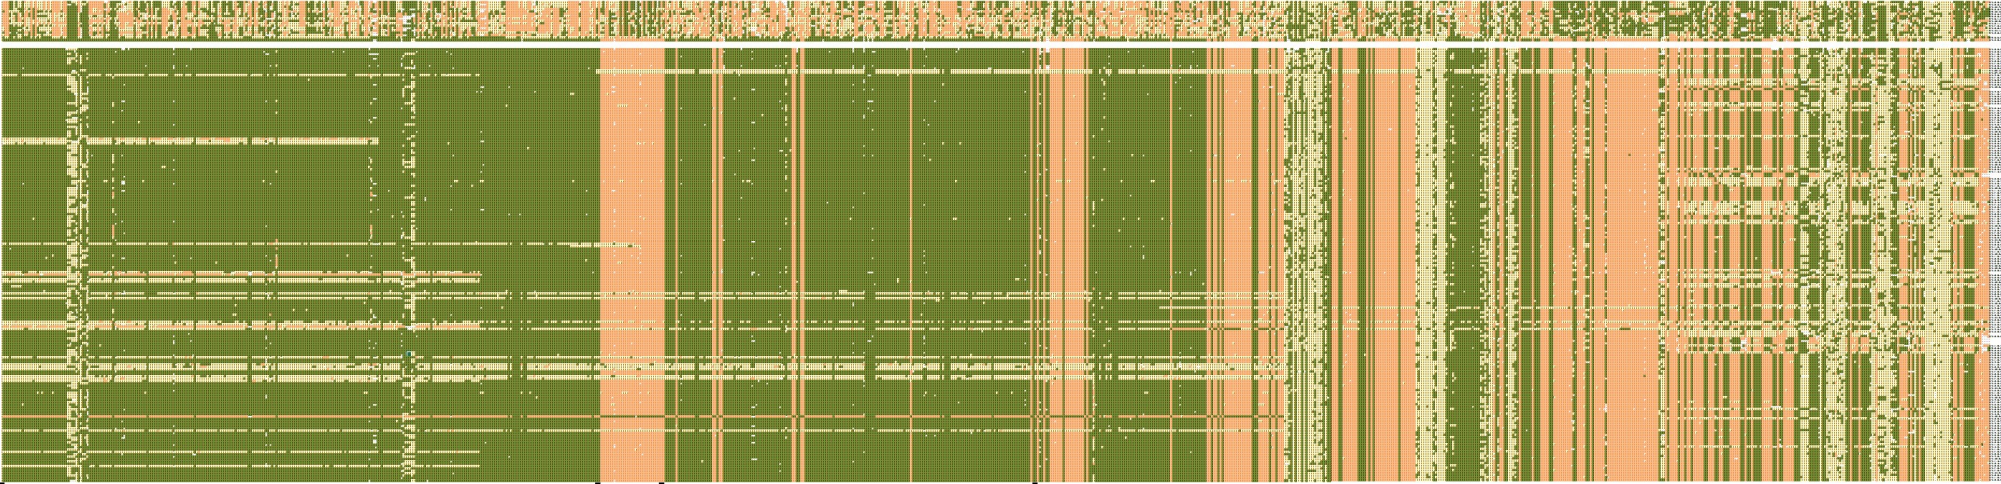

16625000 - 16736000

16748000 - 16821800

Cau.A19G0007320(PREDICTED:  
thrombospondin type-1 domain-  
containing protein 7A-like)

Chr19\_17535000-18285000-1

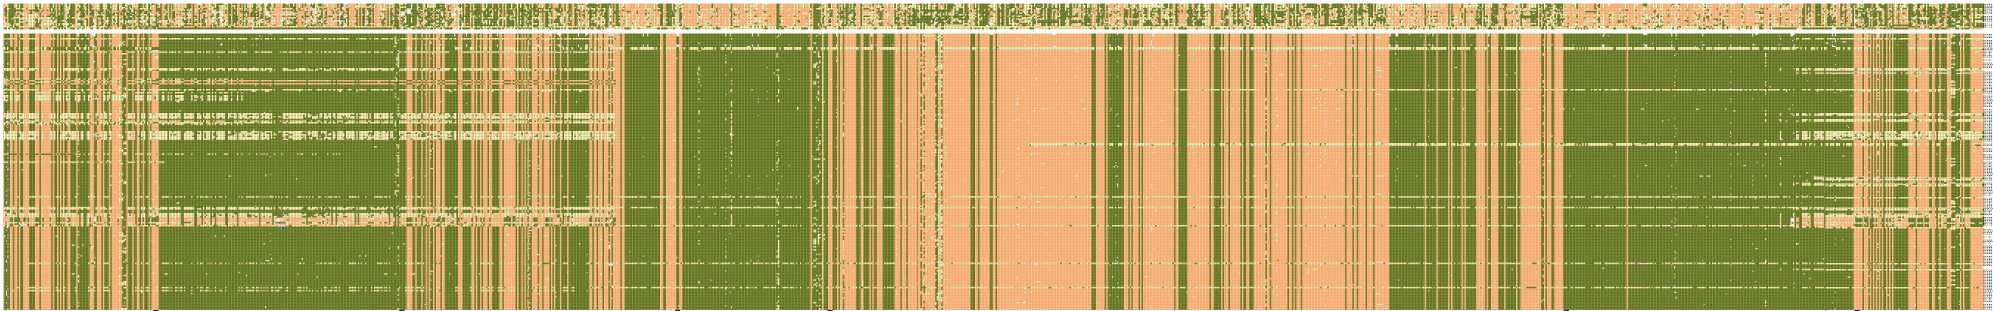

17585000 - 17685000  
Cau.A19G0007830  
Cau.A19G0007840(microtubule-actin cross-linking factor 1 isoform X19)

17785000 - 17835000  
Cau.A19G0007920(PREDICTED: collagen alpha-2(VIII) chain-like )

18110000 - 18235000  
Cau.A19G0007970



Chr19\_23815000-24265000-1

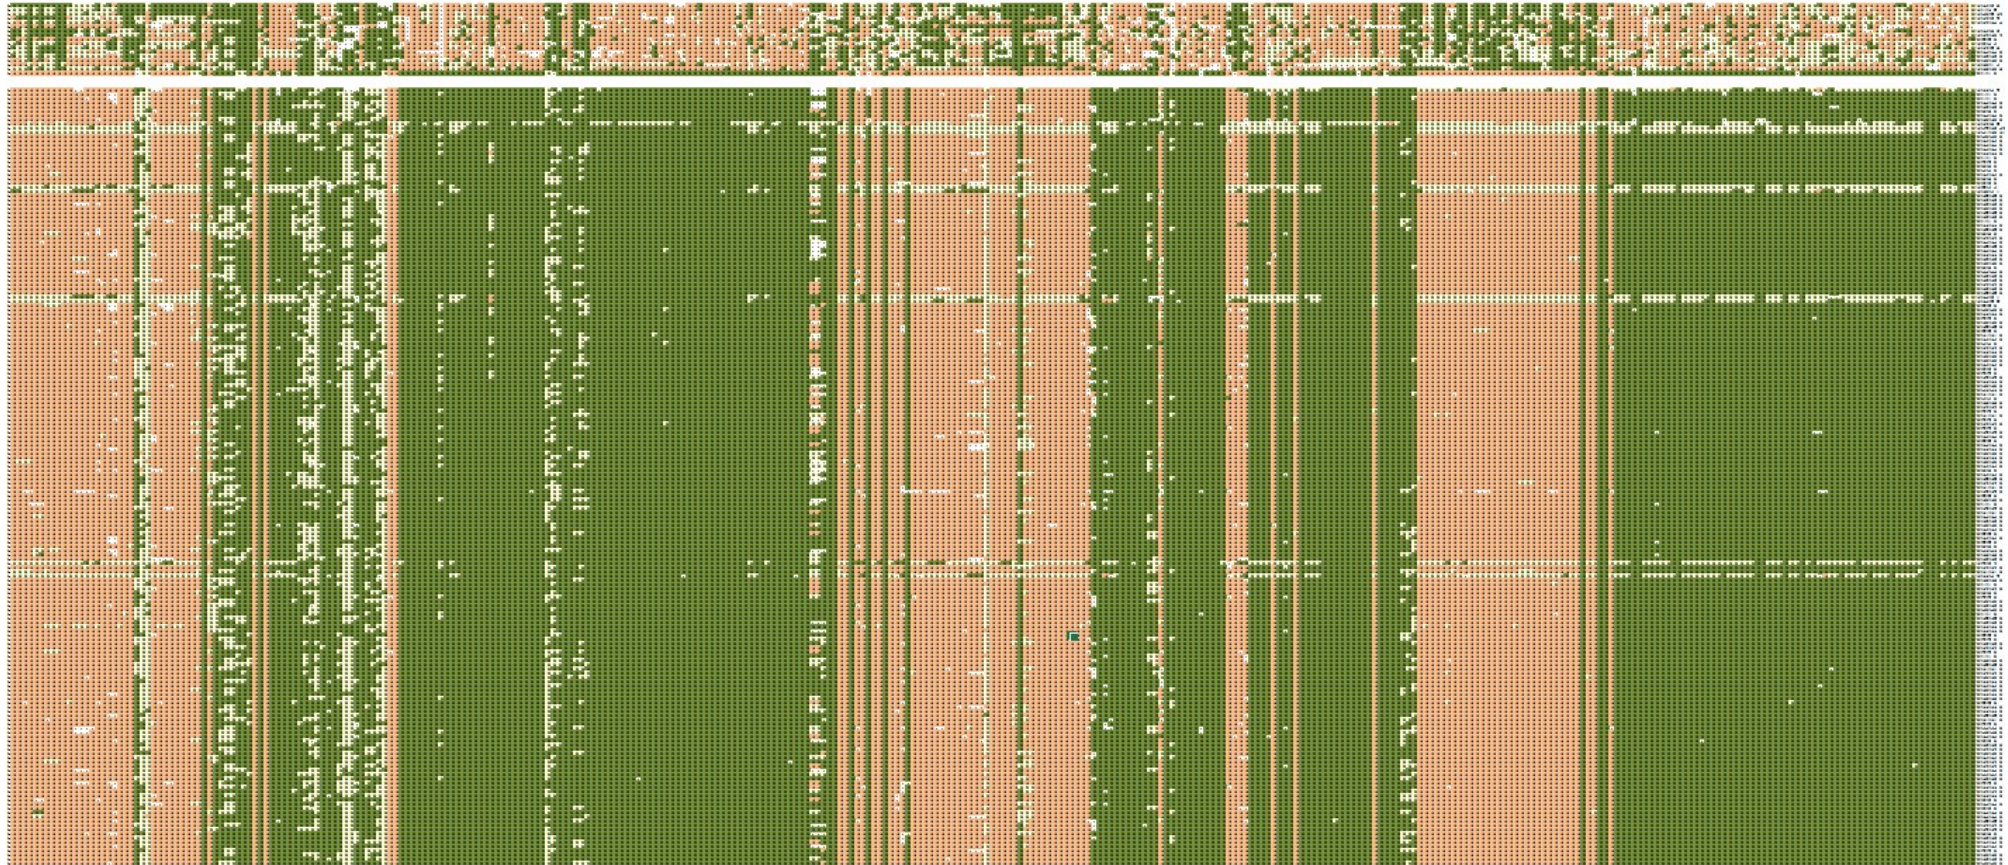

23905000-23995000

Cau.A19G0010330(PREDICTED: XK-related protein 8-like)

Cau.A19G0010340(eyes absent homolog 3 isoform X2)

Cau.A19G0010350(serum/glucocorticoid regulated kinase 1-like)

24137000-24175000

24175000 - 24265000



Chr20\_26515000-26815000-1

- Cau.A20G0011600(PREDICTED: tribbles homolog 2-like isoform X1)
- Cau.A20G0011610(hypothetical protein cypCar\_00047831)
- Cau.A20G0011620
- Cau.A20G0011630(PREDICTED: glycerophosphocholine phosphodiesterase GPCPD1-like)
- Cau.A20G0011640(PREDICTED: uncharacterized protein LOC109615692)
- Cau.A20G0011650(PREDICTED: tRNA (adenine(58)-N(1))-methyltransferase non-catalytic subunit TRM6-like)
- Cau.A20G0011660(fermt1)
- Cau.A20G0011670(fermt1)

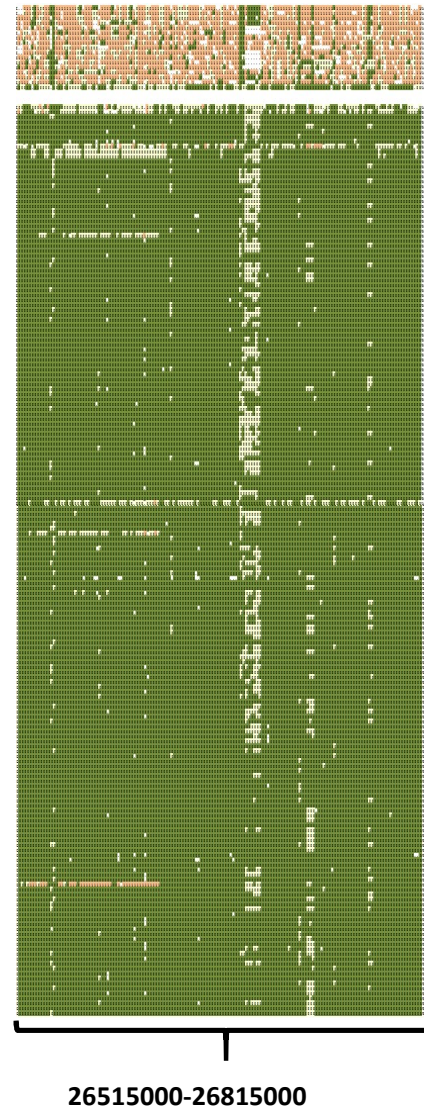



Chr20\_27265000-27535000-1

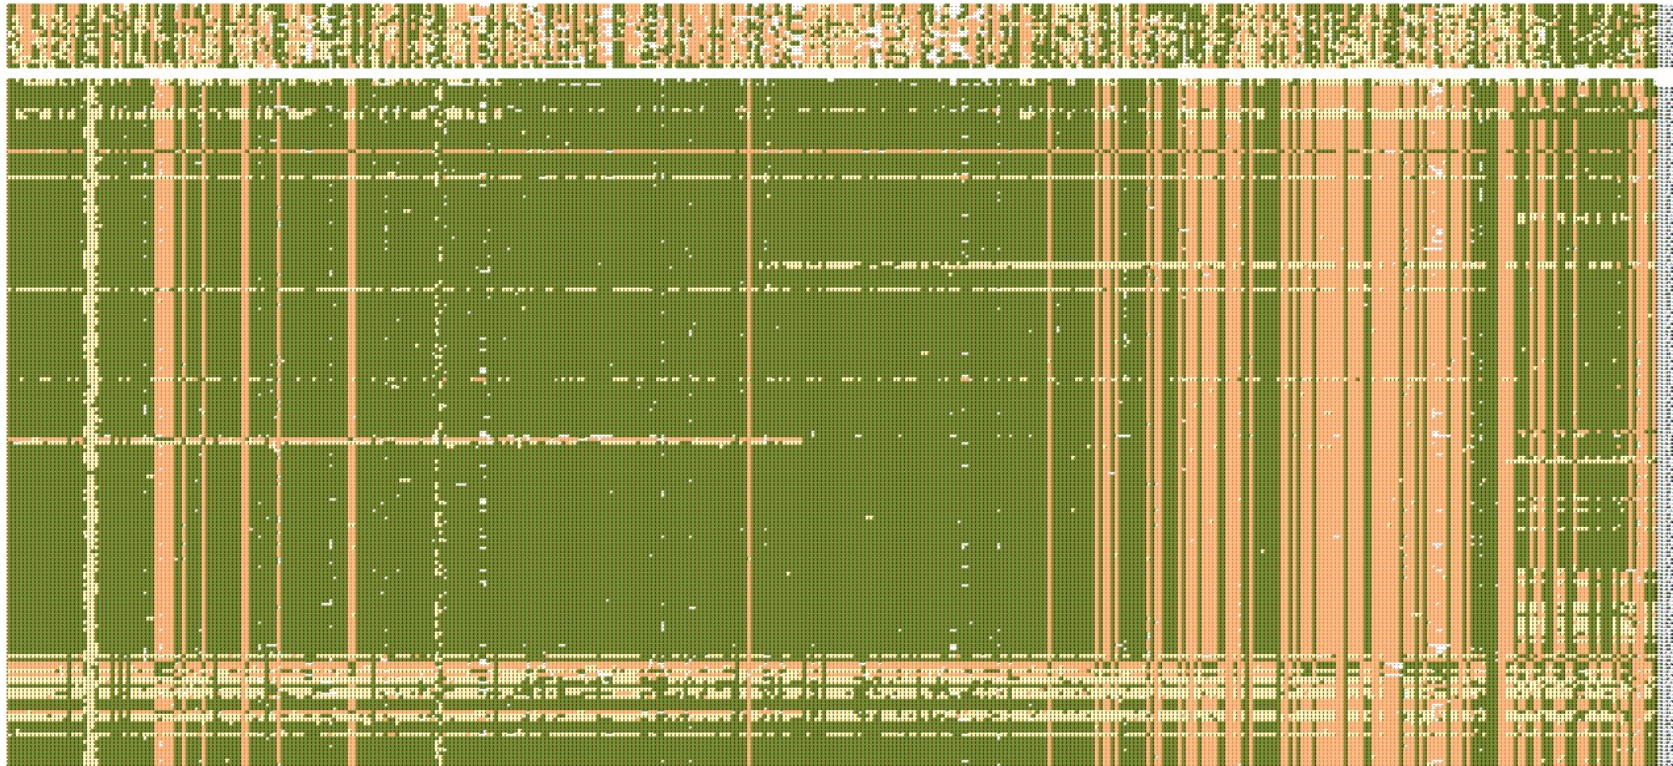

27319000-27427000

Cau.A20G0012160  
Cau.A20G0012170  
Cau.A20G0012180(PREDICTED: estrogen-related receptor gamma-like)  
Cau.A20G0012190(PREDICTED: basic leucine zipper transcriptional factor ATF-like)  
Cau.A20G0012200(hypothetical protein cypCar\_00024897)

27450000-27510000

Cau.A20G0012240(PREDICTED: estrogen-related receptor gamma-like isoform X2)  
Cau.A20G0012250(PREDICTED: G patch domain-containing protein 2-like isoform X4 )  
Cau.A20G0012260(hypothetical protein cypCar\_00028032)  
Cau.A20G0012500(PREDICTED: protein eva-1 homolog C-like isoform X1)



Chr20\_28015000-28335000-1

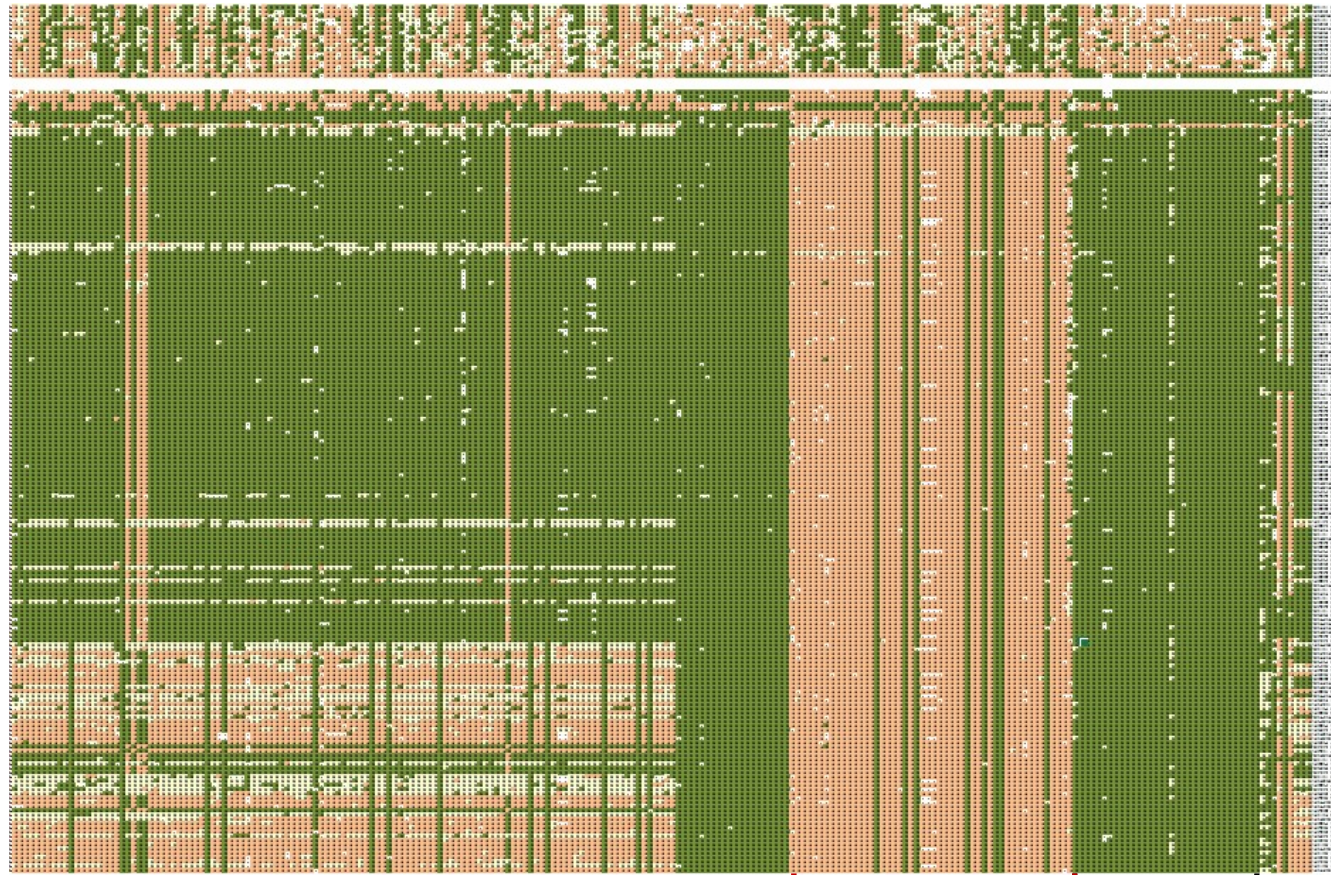

28180333-28201733  
Cau.A20G0012560(hypothetical protein cypCar\_00020236)  
Cau.A20G0012570(hypothetical protein cypCar\_00032134)

28201733-28293200  
Cau.A20G0012570(hypothetical protein cypCar\_00032134)  
Cau.A20G0012580(PREDICTED: paired box protein Pax-1-like isoform X1)  
Cau.A20G0012590(PREDICTED: homeobox protein Nkx-2.2a-like)  
Cau.A20G0012600(PREDICTED: cleavage and polyadenylation specificity factor subunit 2)

28293200-28314600



Chr20\_28565000-29075000-1

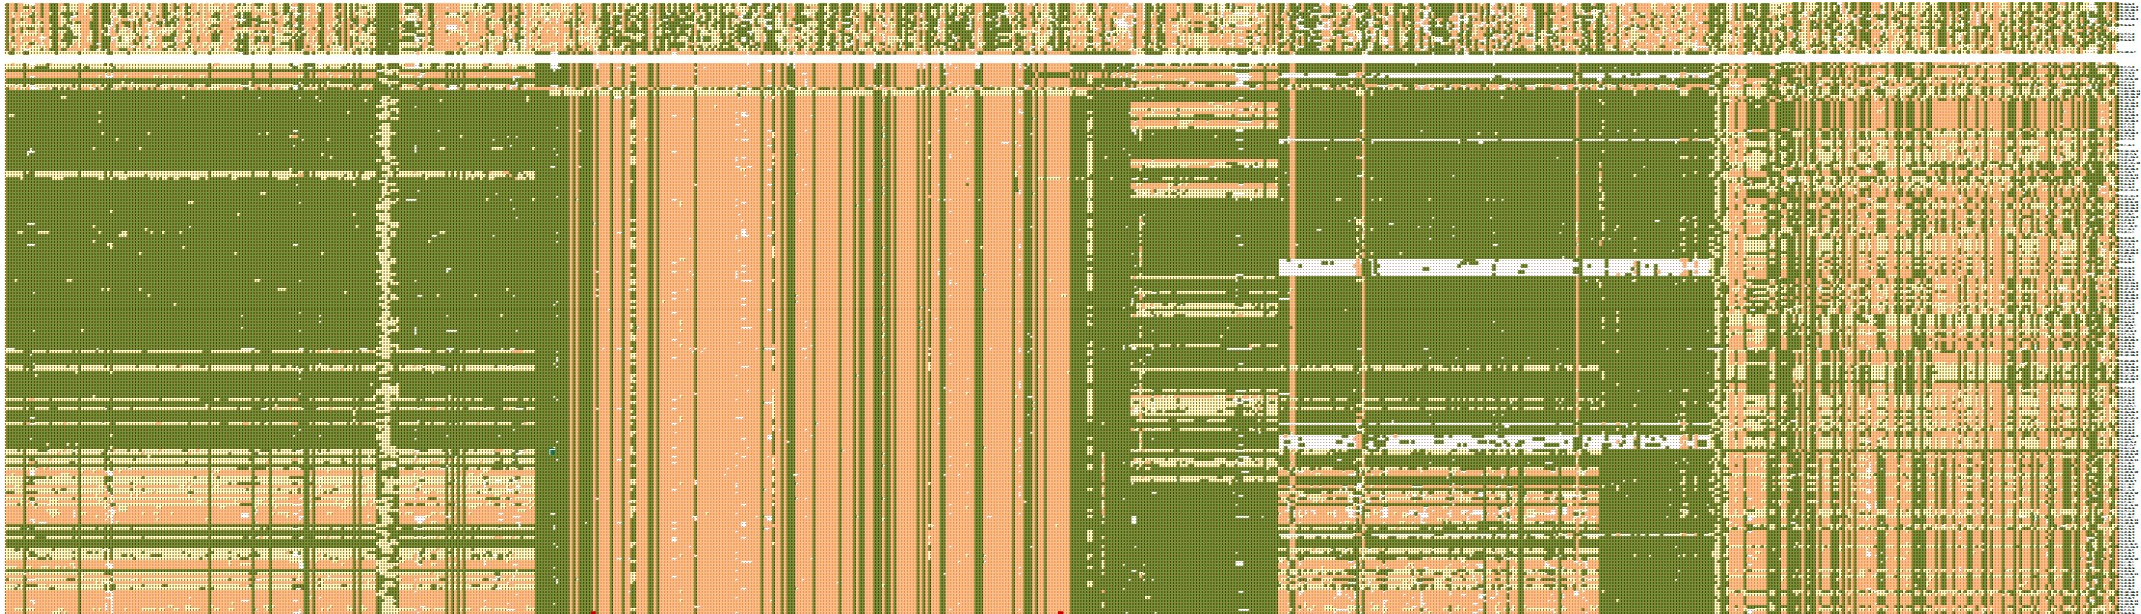

**28705000-28820000**

**Cau.A20G0012820(hypothetical protein cypCar\_00034657)**

**Cau.A20G0012830(hypothetical protein cypCar\_00034656)**

**Cau.A20G0012850(PREDICTED: paired box protein Pax-1-like isoform X1)**

**Cau.A20G0012870(PREDICTED: microsomal glutathione S-transferase 3-like)**

**Cau.A20G0012880(PREDICTED: cingulin-like isoform X1)**

**Cau.A20G0012890(PREDICTED: mucin-7-like)**

**Cau.A20G0012900(PREDICTED: calcitonin gene-related peptide type 1 receptor-like)**



Chr21\_12315000-12915000-1

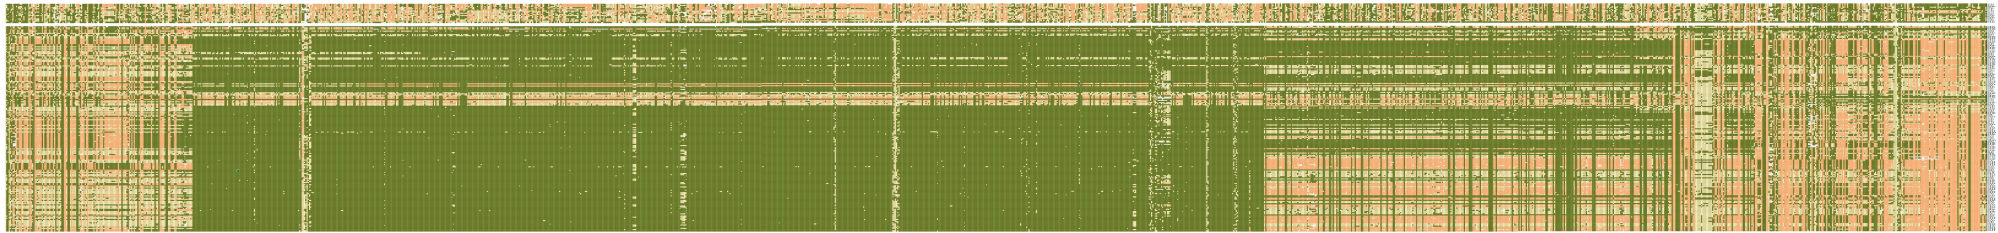

12375000-12695000

Cau.A21G0005700(PREDICTED: nectin-3-like protein isoform X4)

Cau.A21G0005730(PREDICTED: nectin-3-like protein)

Cau.A21G0005740(PREDICTED: diablo homolog, mitochondrial-like)

Cau.A21G0005750(PREDICTED: olfactory receptor 4C15-like)

Cau.A21G0005760(PREDICTED: B9 domain-containing protein 2-like)

Cau.A21G0005770(transforming growth factor beta, partial)

Cau.A21G0005780(PREDICTED: carbonyl reductase [NADPH] 1-like)

Cau.A21G0005790(PREDICTED: olfactory receptor 52N5-like)

Cau.A21G0005800(PREDICTED: olfactory receptor 51I1-like)

Cau.A21G0005810(PREDICTED: olfactory receptor 5M3-like)

Cau.A21G0005820(PREDICTED: olfactory receptor 52D1-like)

Cau.A21G0005830(PREDICTED: DNA polymerase delta subunit 3-like isoform X2)

Cau.A21G0005840(hypothetical protein cypCar\_00020954)

Cau.A21G0005860(PREDICTED: sialidase-3-like)

Cau.A21G0005870(PREDICTED: sialidase-4-like)

Cau.A21G0005880(beta-defensin 2)

Cau.A21G0005890

Cau.A21G0005900(hypothetical protein cypCar\_00049531)



Chr23\_17750000-18250000-1

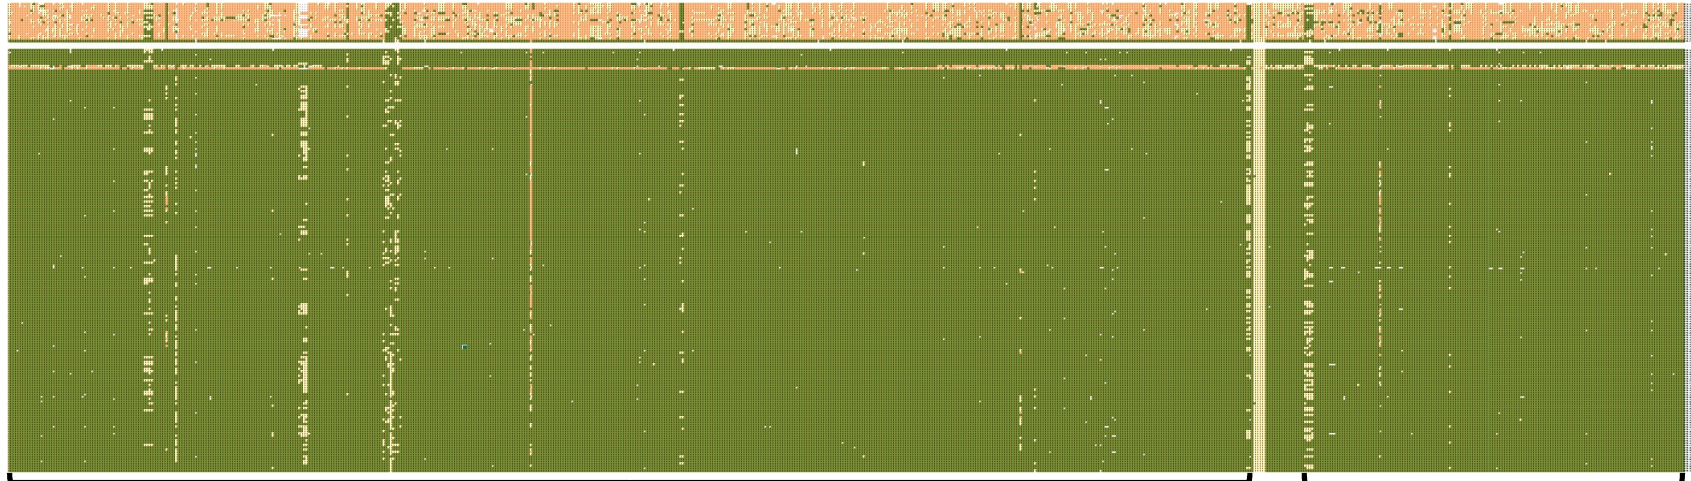

Cau.A23G0004330(PREDICTED: interleukin-1 receptor-associated kinase 1-binding protein 1 homolog)

Cau.A23G0004340(PREDICTED: uncharacterized protein LOC109064343)

Cau.A23G0004350(PREDICTED: PH-interacting protein isoform X2)

Cau.A23G0004360(high mobility group nucleosome-binding domain-containing protein 3 isoform 3)

Cau.A23G0004370(PREDICTED: lebercilin-like isoform X1)

Cau.A23G0004380(hypothetical protein cypCar\_00017156, partial)

Cau.A23G0004390(PREDICTED: SH3 domain-binding glutamic acid-rich-like protein 3)

Cau.A23G0004400(rps12)

Cau.A23G0004410(eya4)

Cau.A23G0004420(tcf21)

17750000-18124000

Cau.A23G0004440(PREDICTED: TATA box-binding protein-like protein 1)

Cau.A23G0004450(slca2a12)

Cau.A23G0004460(PREDICTED: serine/threonine-protein kinase Sgk1 isoform X2)

Cau.A23G0004470(hypothetical protein cypCar\_00032997)

Cau.A23G0004490(albh8a1)

Cau.A23G0004500(PREDICTED: myelin-associated glycoprotein-like)

Cau.A23G0004510(PREDICTED: uncharacterized protein LOC107723734 isoform X3)

Cau.A23G0004520(myb)

Cau.A23G0004530(PREDICTED: transcriptional activator Myb)

Cau.A23G0004540(PREDICTED: mitochondrial fission regulator 2-like)

Cau.A23G0004550(PREDICTED: armadillo repeat-containing protein 1-like)

Cau.A23G0004560(NACHT, LRR and PYD domains-containing protein 12)

Cau.A23G0004570(PREDICTED: uncharacterized protein C1orf115-like)

18141000-18250000

Cau.A23G0004600(PREDICTED: PAB-dependent poly(A)-specific ribonuclease subunit PAN2-like isoform X2)

Cau.A23G0004610(PREDICTED: LOW QUALITY PROTEIN: PAB-dependent poly(A)-specific ribonuclease subunit PAN2-like)

Cau.A23G0004620(PREDICTED: zinc finger protein PLAGL2-like)

Cau.A23G0004630(PREDICTED: trafficking protein particle complex subunit 6B)

Cau.A23G0004640(hypothetical protein cypCar\_00007081)

Cau.A23G0004650(cd63)

Cau.A23G0004660(PREDICTED: LETM1 domain-containing protein 1-like)

Cau.A23G0004670(PREDICTED: gametocyte-specific factor 1-like)



Chr23 20505000-20850000-1

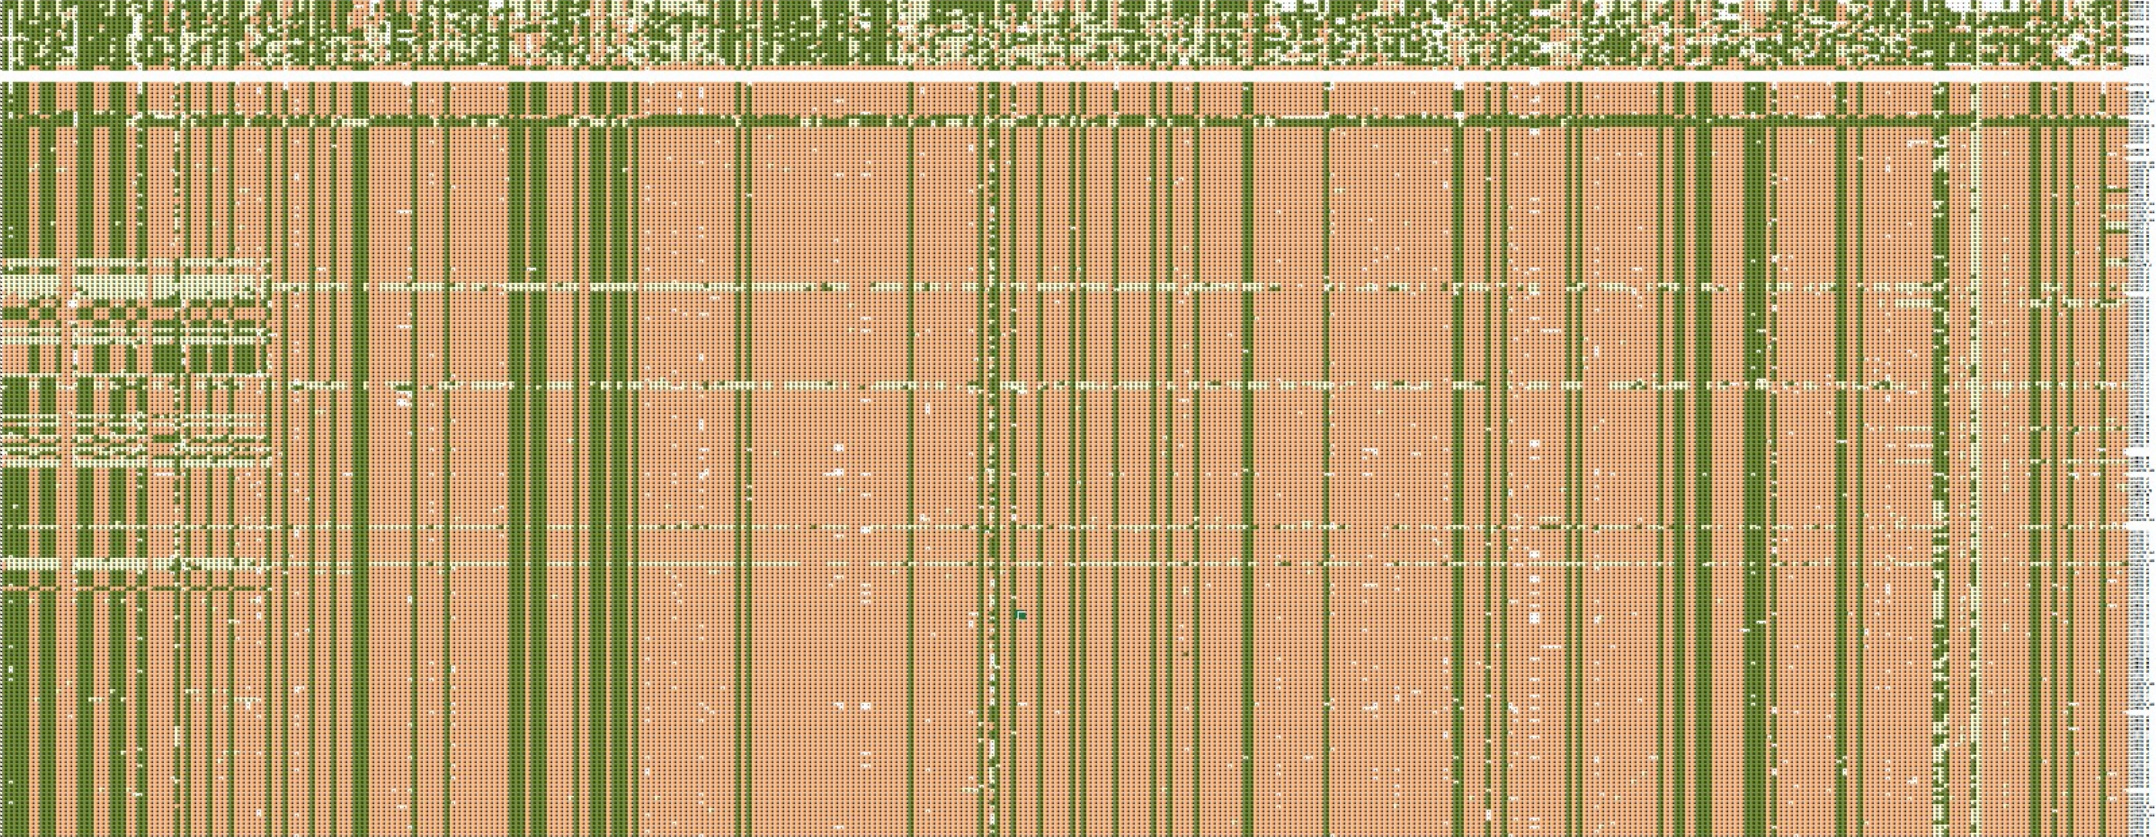

20600000-20850000

- Cau.A23G0005920(PREDICTED: von Willebrand factor A domain-containing protein 5B1-like)
- Cau.A23G0005930(PREDICTED: calcium/calmodulin-dependent protein kinase II inhibitor 2-like)
- Cau.A23G0005940(PREDICTED: mitochondrial ubiquitin ligase activator of NFKB 1-like)
- Cau.A23G0005950(PREDICTED: protein FAM43B-like)
- Cau.A23G0005960(PREDICTED: trypsin-like )
- Cau.A23G0005980(hypothetical protein cypCar\_00039019)
- Cau.A23G0005990(hypothetical protein cypCar\_00039020)

- Cau.A23G0006000(PREDICTED: serine/threonine-protein kinase PINK1, mitochondrial-like isoform X2)
- Cau.A23G0006020(PREDICTED: agmatinase, mitochondrial)
- Cau.A23G0006030(PREDICTED: LOW QUALITY PROTEIN: dnaJ homolog subfamily C member 16 )
- Cau.A23G0006040(PREDICTED: torsin-1A-like)



Chr23\_21050000-21695000-1

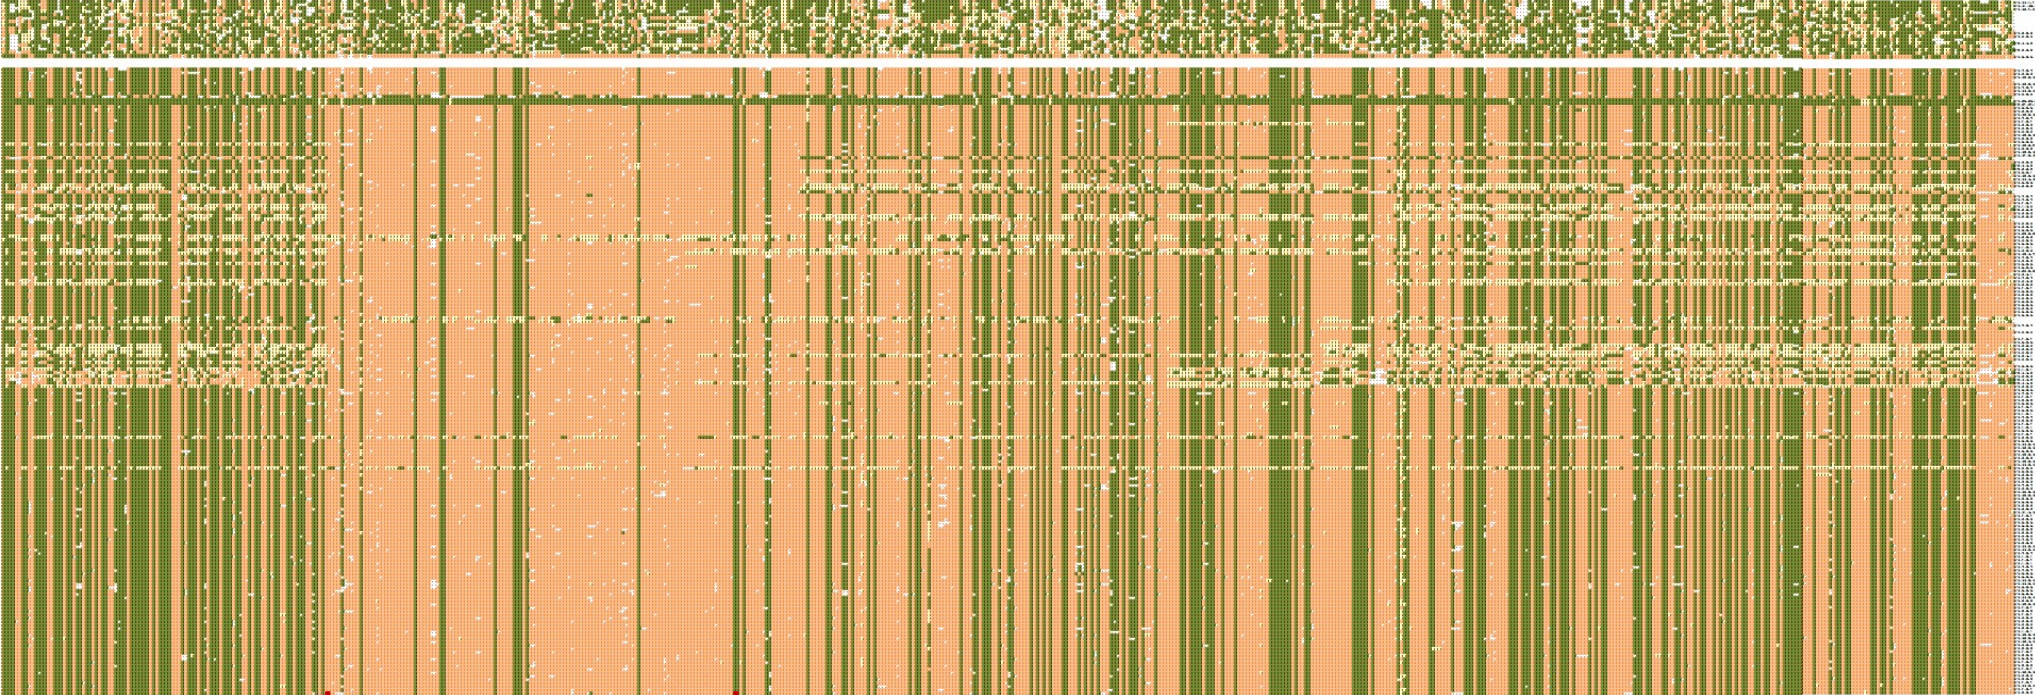

21590000-22400000



Chr26\_4600000-4900000-01

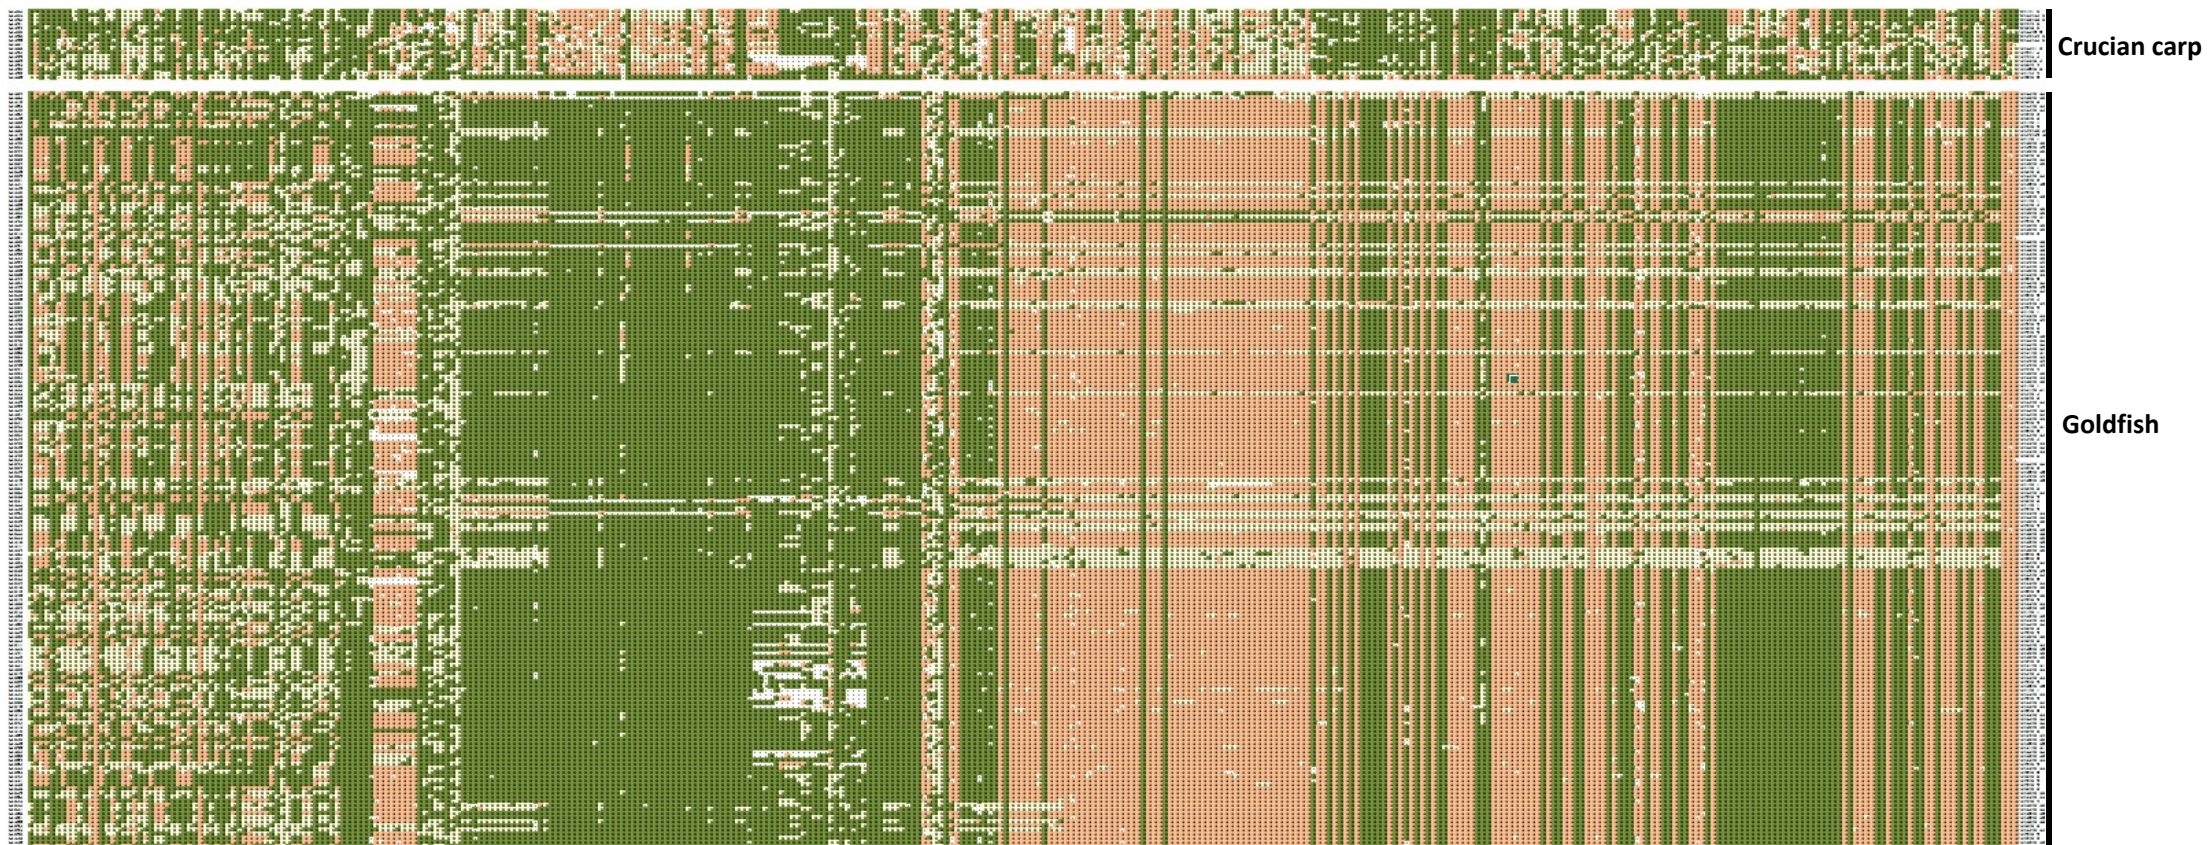

Crucian carp

Goldfish

4675000-4710000

Cau.B01G0002130(PREDICTED: LOW QUALITY PROTEIN: lanC-like protein 1)

Cau.B01G0002140(hypothetical protein cypCar\_00029514)



Chr26\_4965000-5095000-01

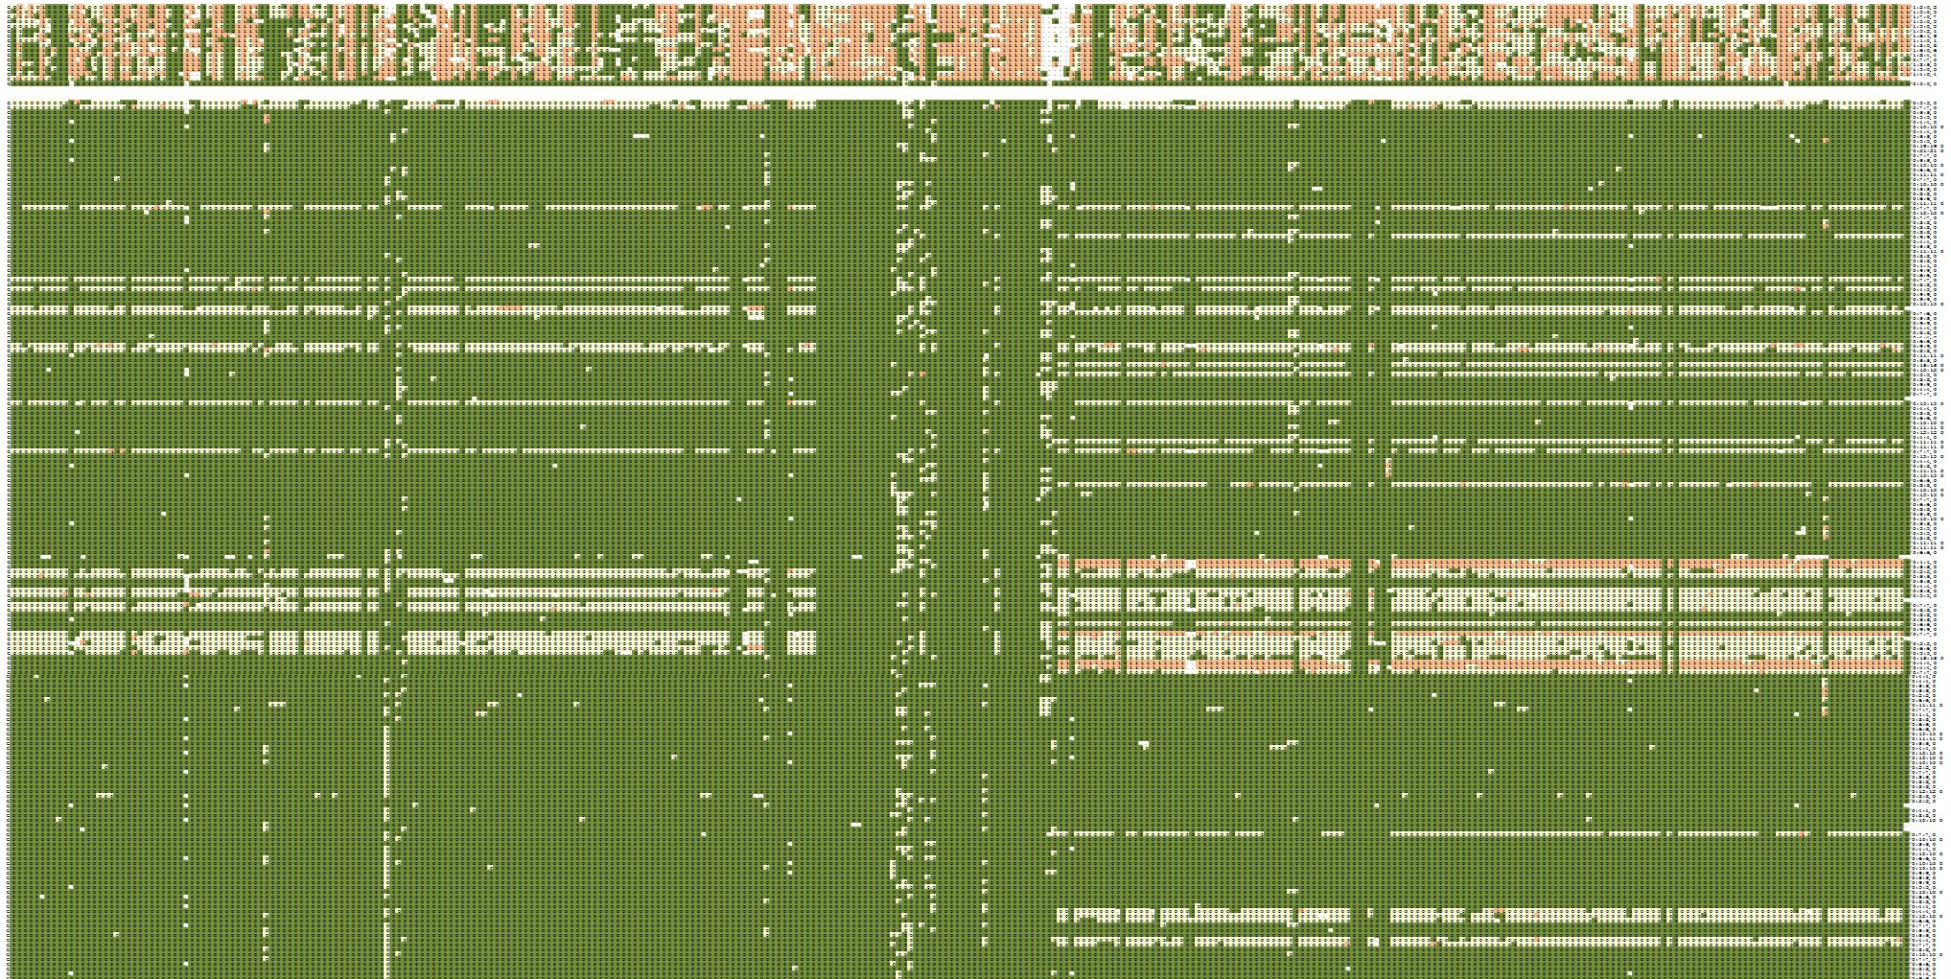

5028000-5036000

Cau.B01G0002300(PREDICTED: caskin-1-like)

Cau.B01G0002360(PREDICTED: voltage-dependent T-type calcium channel subunit alpha-1H-like)



Chr26\_5125000-5275000-01

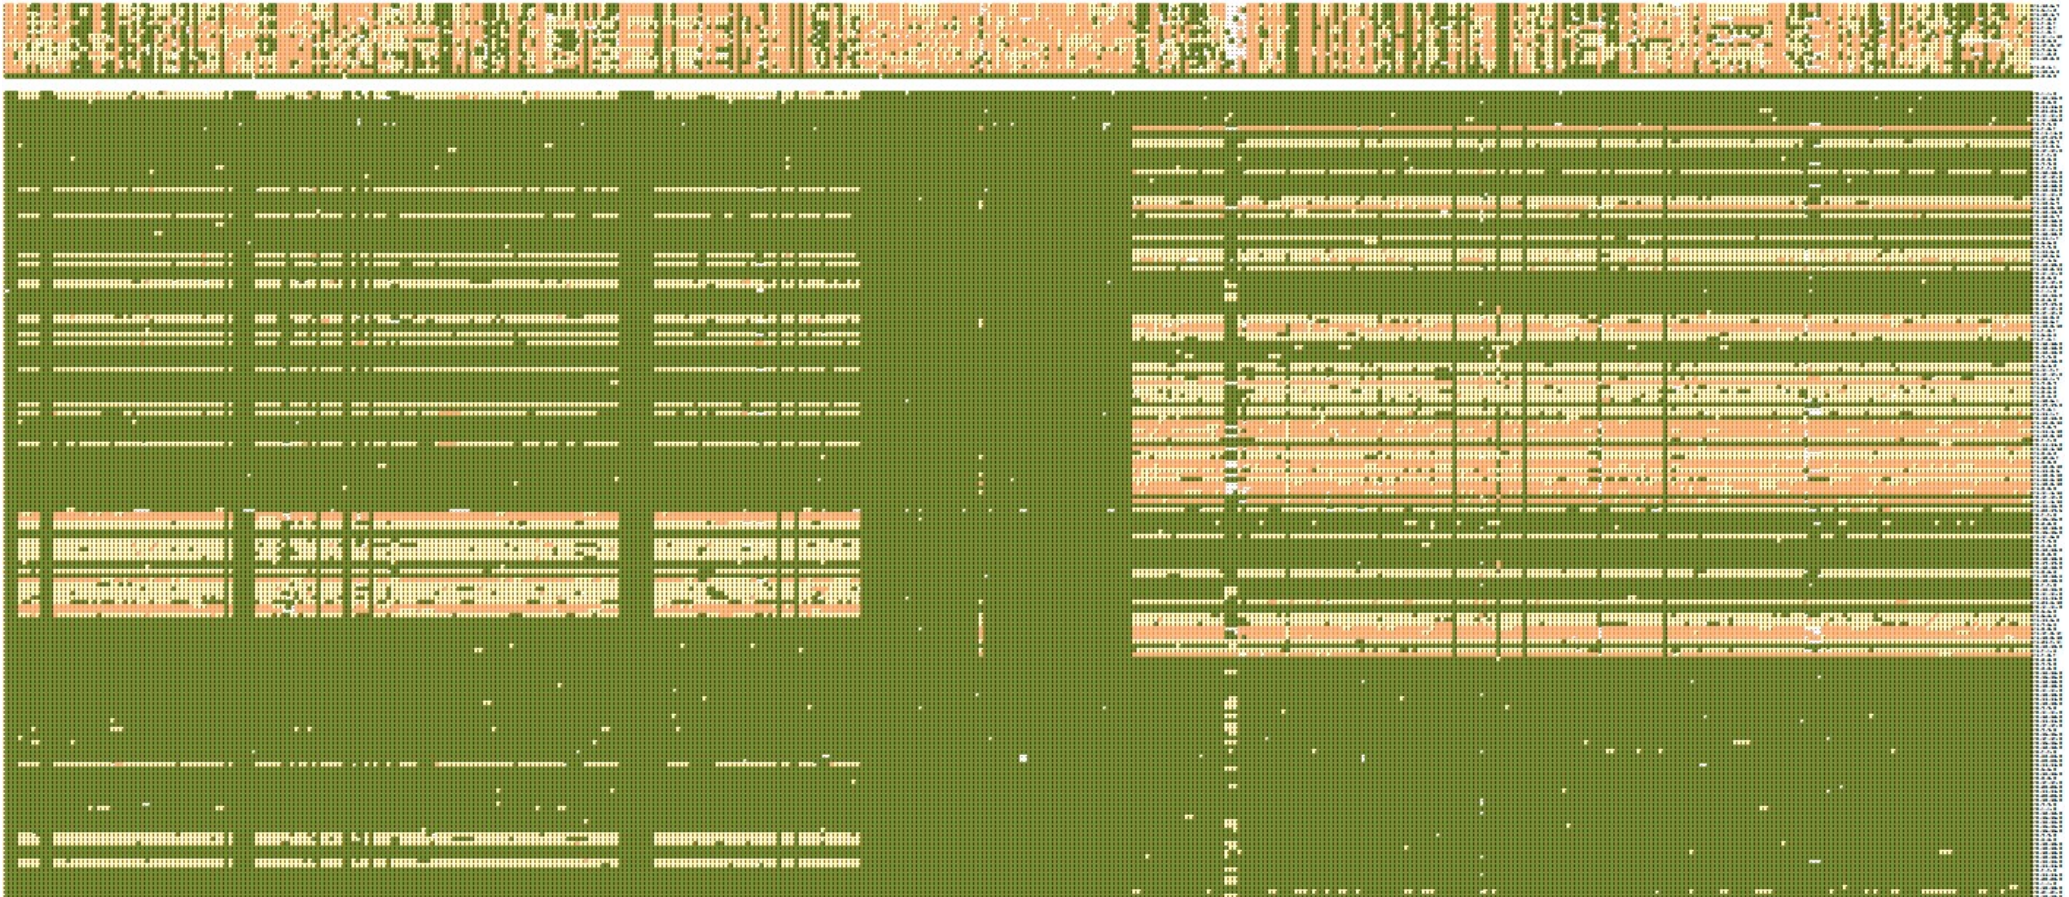

5190000-5210000

Cau.B01G0002360(PREDICTED: voltage-dependent T-type calcium channel subunit alpha-1H-like)

Cau.B01G0002370(hypothetical protein cypCar\_00026107)



Chr26\_6985000-7635000-01

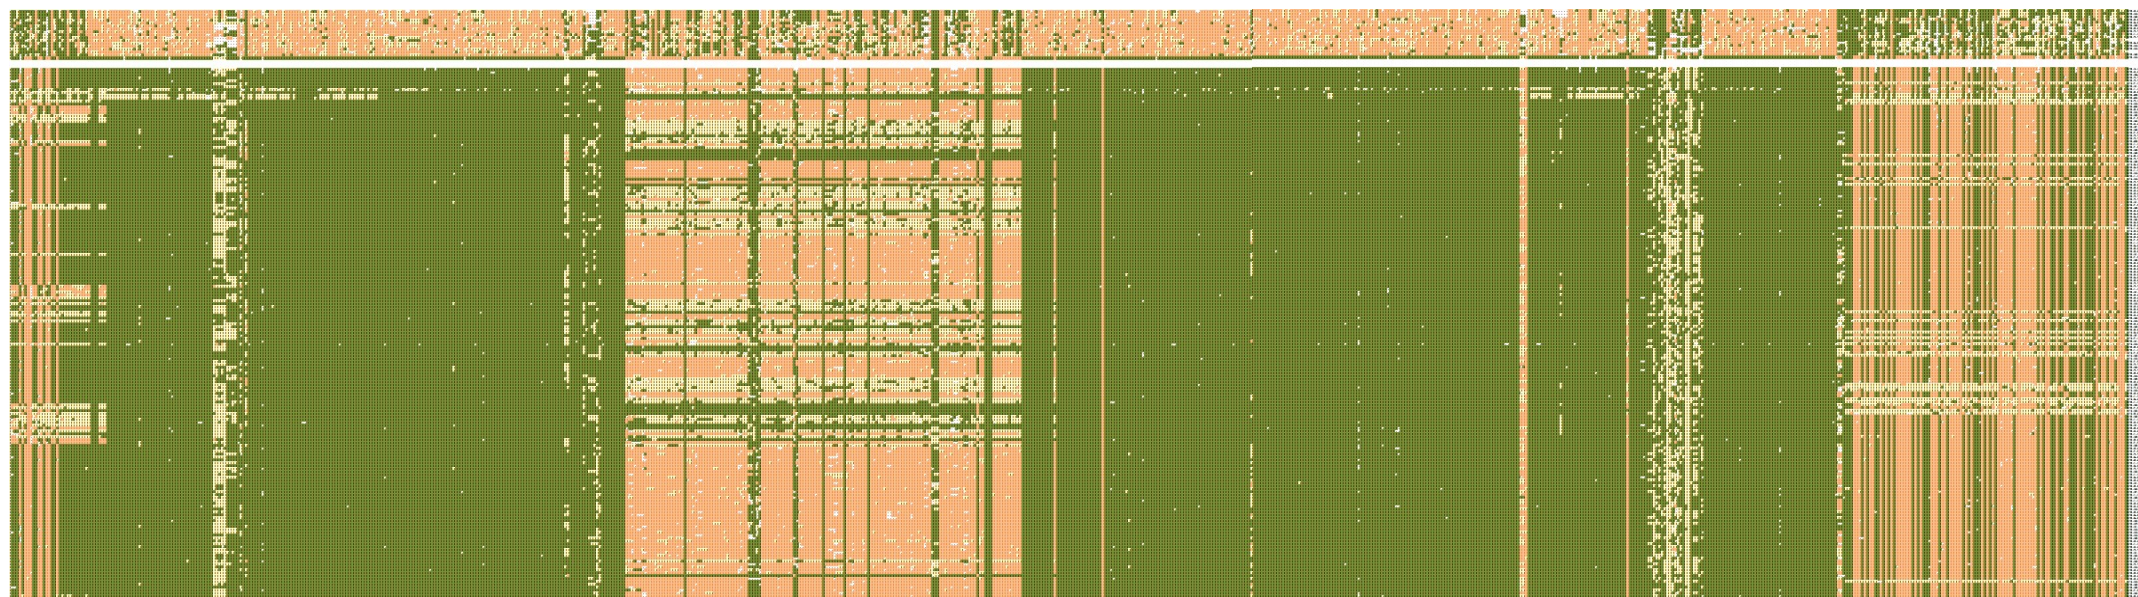

70160000 - 7129200

Cau.B01G0003200(PREDICTED: protein sidekick-1-like)  
Cau.B01G0003210(PREDICTED: protein sidekick-1-like)  
Cau.B01G0003210(PREDICTED: protein sidekick-1-like)

7315000 -7522000

Cau.B01G0003280(PREDICTED: protein tweety homolog 3-like)  
Cau.B01G0003290(PREDICTED: IQ domain-containing protein E-like isoform X4)  
Cau.B01G0003300(PREDICTED: sorting nexin-8-like)  
Cau.B01G0003310(PREDICTED: G protein-coupled receptor kinase 4-like isoform X1)  
Cau.B01G0003320(PREDICTED: tetraspanin-5-like)  
Cau.B01G0003330(hypothetical protein cypCar\_00028196)  
Cau.B01G0003340(mttp)  
Cau.B01G0003350(PREDICTED: probable pancreatic secretory proteinase inhibitor)  
Cau.B01G0003360(PREDICTED: beta-1,4-galactosyltransferase 1-like)  
Cau.B01G0003370(stra6l)  
Cau.B01G0003380(tdrd7a)  
Cau.B01G0003390(PREDICTED: tropomodulin-1-like isoform X4)  
Cau.B01G0003400(PREDICTED: complexin-1-like)  
Cau.B01G0003410(PREDICTED: bifunctional UDP-N-acetylglucosamine 2-epimerase/N-acetylmannosamine kinase-like isoform X3)

7537500 -7586300

Cau.B01G0003420(nansa)  
Cau.B01G0003430(hypothetical protein cypCar\_00018529)  
Cau.B01G0003440(hypothetical protein cypCar\_00011964)  
Cau.B01G0003450(PREDICTED: UPF0462 protein C4orf33 homolog)



Chr27\_75000-405000-01

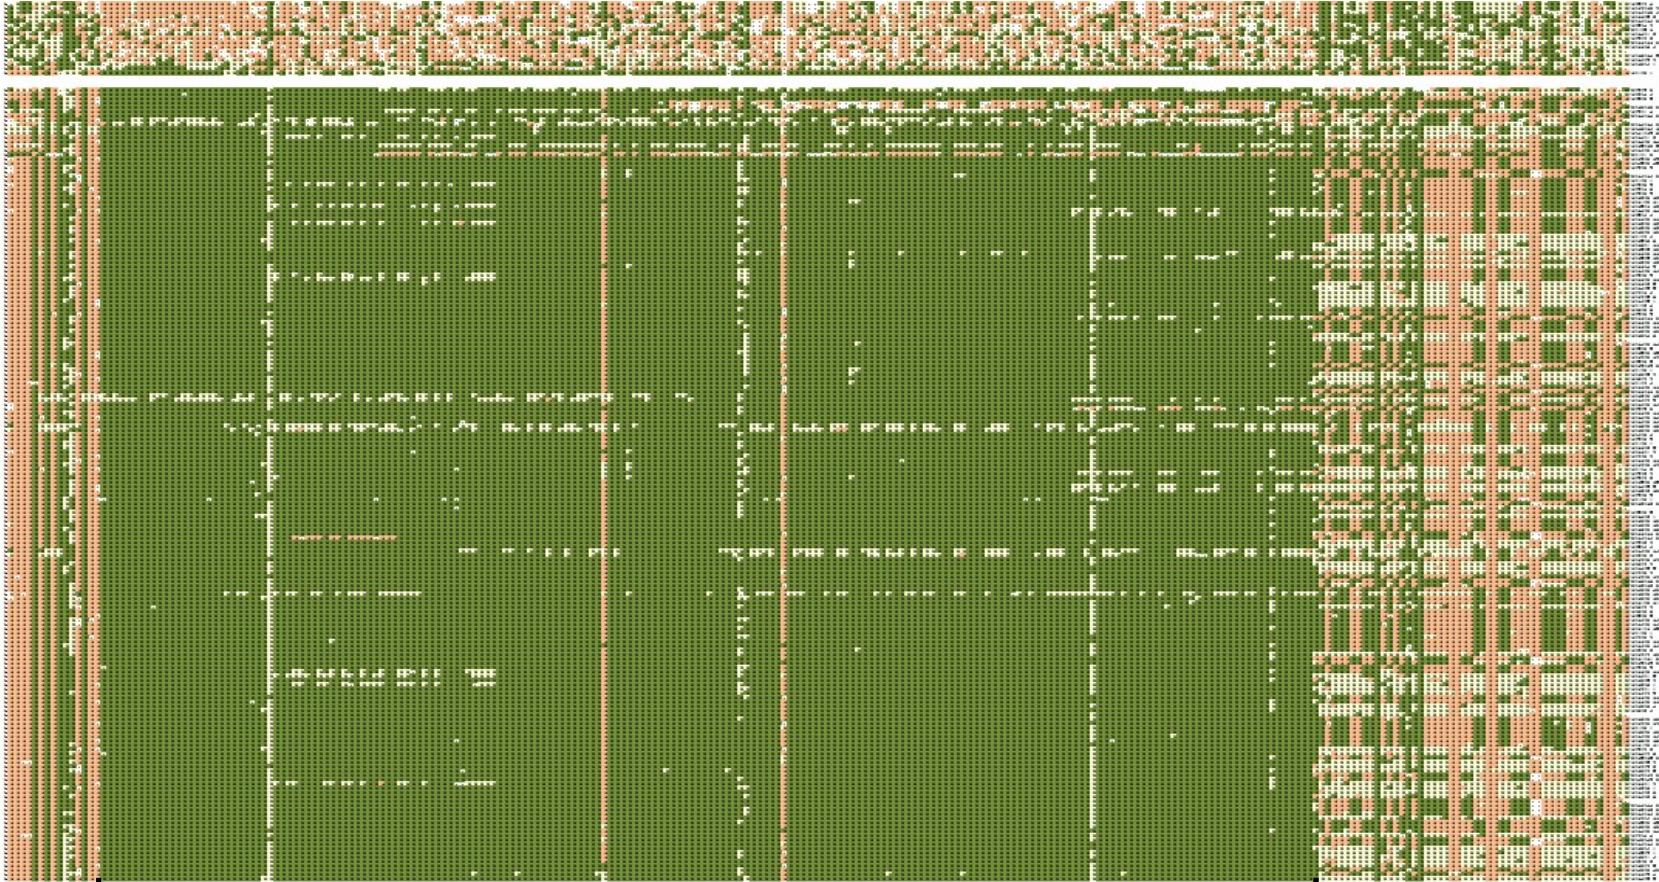

196000-395000  
Cau.B02G0000010(PREDICTED: adhesion G protein-coupled receptor L2-like isoform X1)  
Cau.B02G0000020  
Cau.B02G0000030(PREDICTED: B-cell lymphoma/leukemia 10-like isoform X1)  
Cau.B02G0000040(hypothetical protein cypCar\_00028447)  
Cau.B02G0000050(PREDICTED: mucolipin-3-like)  
Cau.B02G0000060(PREDICTED: afadin- and alpha-actinin-binding protein-like isoform X1)



Chr27\_615000-755000-01

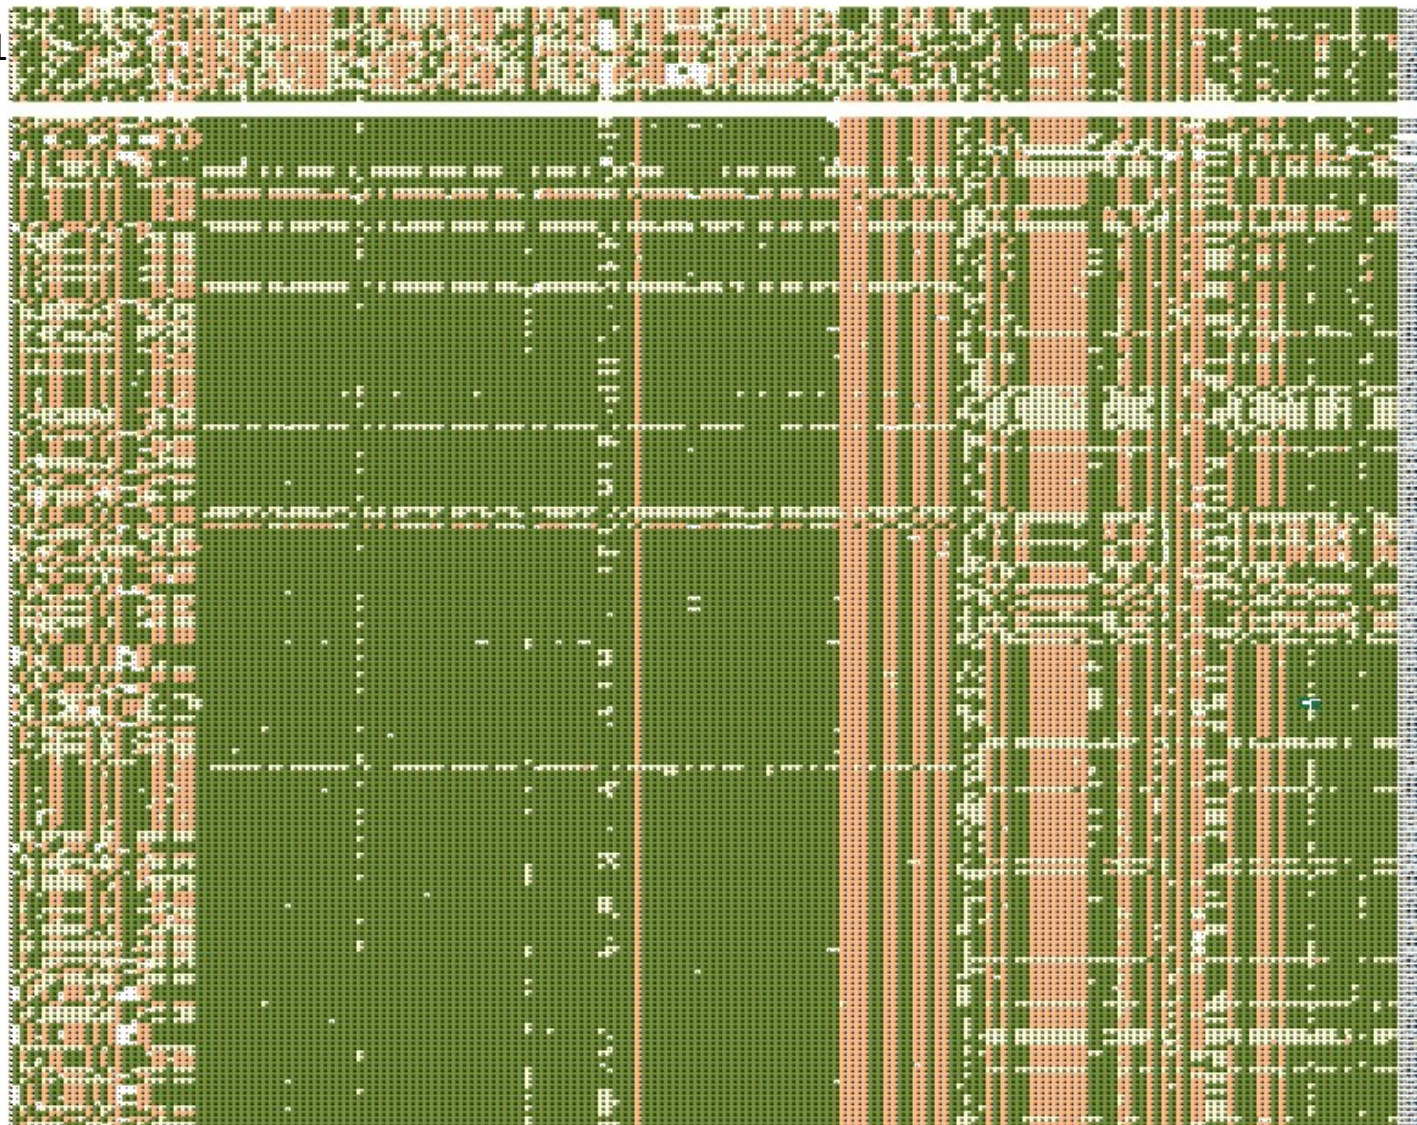

635000-700000  
Cau. B02G0000230



Chr27\_855000-1045000-01

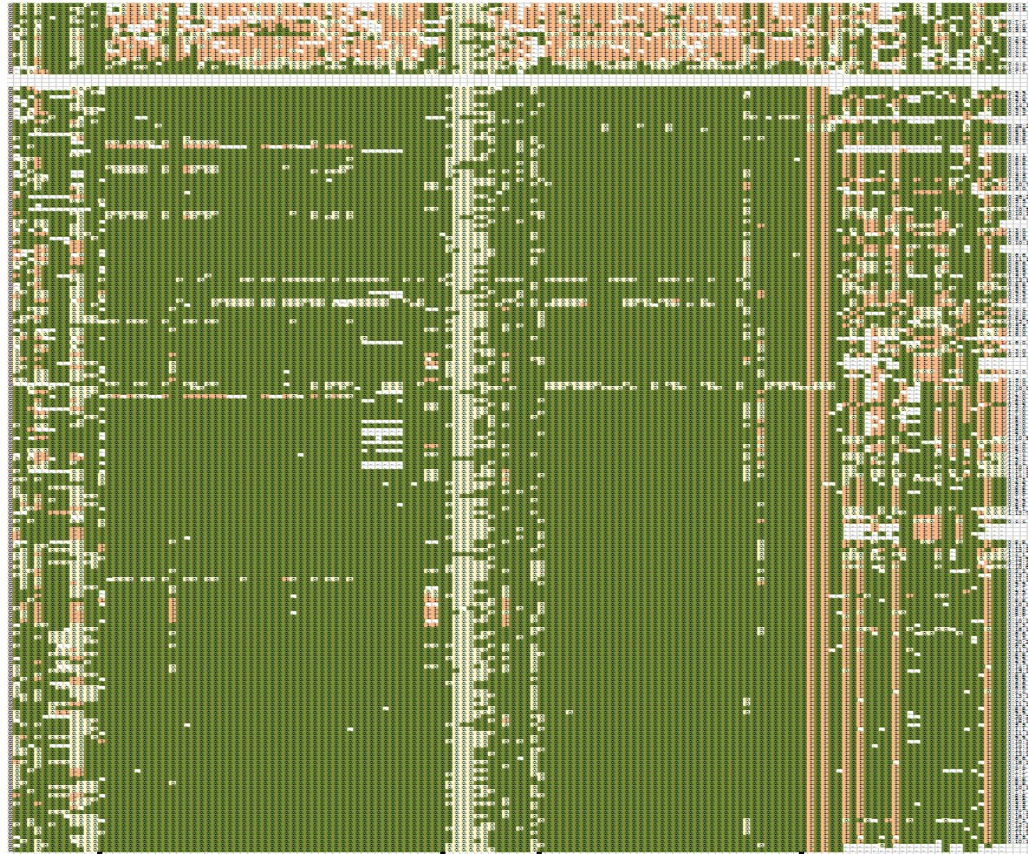

874000-940500

Cau.B02G0000270(PREDICTED: FYN-binding protein-like isoform X1)  
Cau.B02G0000280(PREDICTED: disabled homolog 1-like isoform X1)  
Cau.B02G0000290(PREDICTED: cAMP-dependent protein kinase catalytic subunit beta)

957000-1007000

Cau.B02G0000290(PREDICTED: cAMP-dependent protein kinase catalytic subunit beta)  
Cau.B02G0000300(PREDICTED: adhesion G protein-coupled receptor L2-like isoform X4)



Chr27\_14345000-15065000

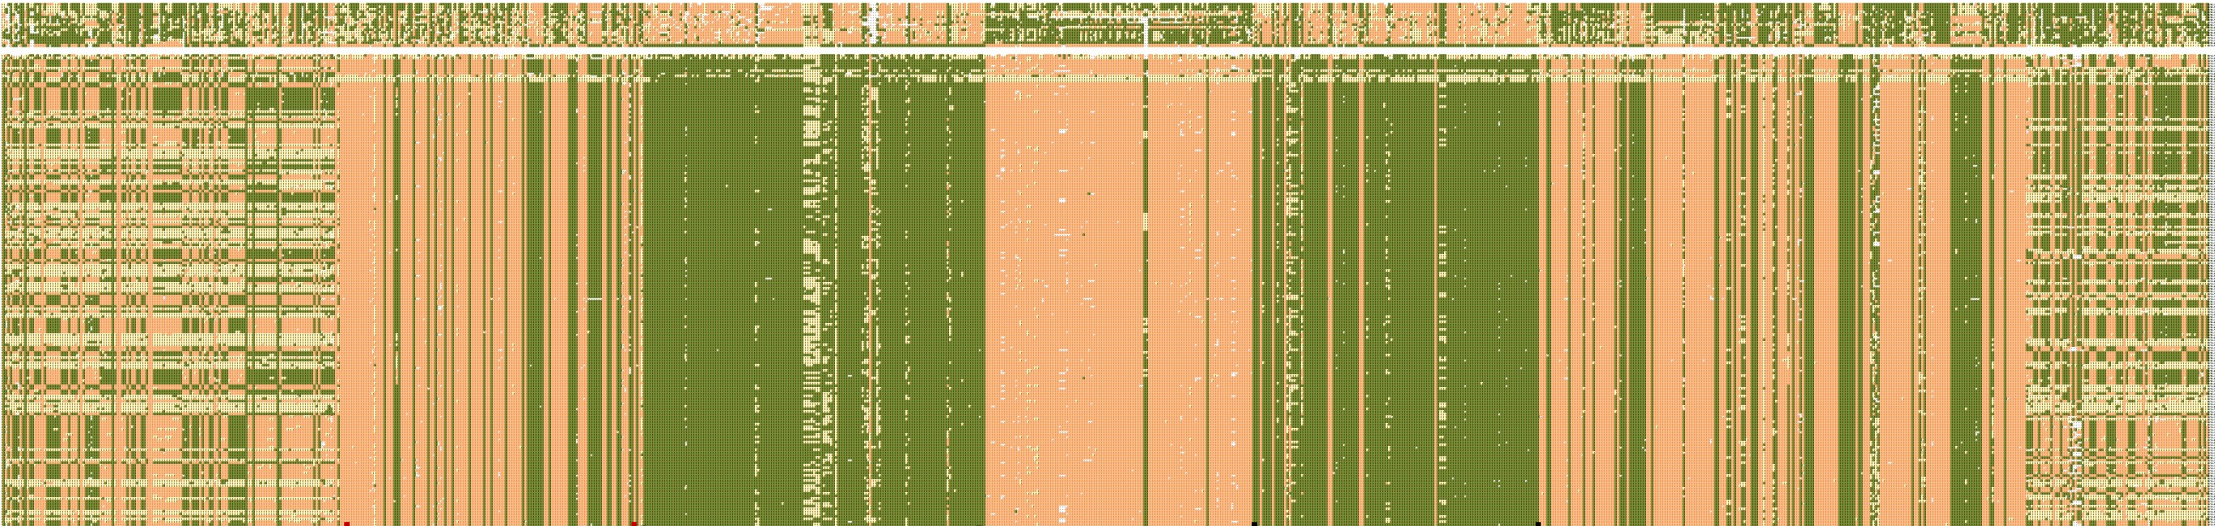

14450000-14550000  
Cau.B02G0005340  
Cau.B02G0005350

14550000-14670000  
Cau.B02G0005350(PREDICTED: LOW QUALITY PROTEIN: rho GTPase-activating protein 29-like)  
Cau.B02G0005360(PREDICTED: rho GTPase-activating protein 29 isoform X3)  
Cau.B02G0005370(PREDICTED: ATP-binding cassette sub-family D member 3-like)  
Cau.B02G0005380(PREDICTED: ATP-binding cassette sub-family D member 3-like)  
Cau.B02G0005390(PREDICTED: ATP-binding cassette sub-family D member 3-like)  
Cau.B02G0005400(f3b)  
Cau.B02G0005410(PREDICTED: calponin-3-like)  
Cau.B02G0005420(hypothetical protein cypCar\_00032439)

14670000-14760000  
Cau.B02G0005420  
Cau.B02G0005430

14760000-14850000  
Cau.B02G0005430  
Cau.B02G0005450(PREDICTED: polypyrimidine tract-binding protein 2 isoform X1)  
Cau.B02G0005460(PREDICTED: dihydropyrimidine dehydrogenase [NADP(+)]-like)  
Cau.B02G0005470(unnamed protein product)  
Cau.B02G0005480(PREDICTED: dihydropyrimidine dehydrogenase [NADP(+)]-like )



Chr28\_29415000-29665000-1

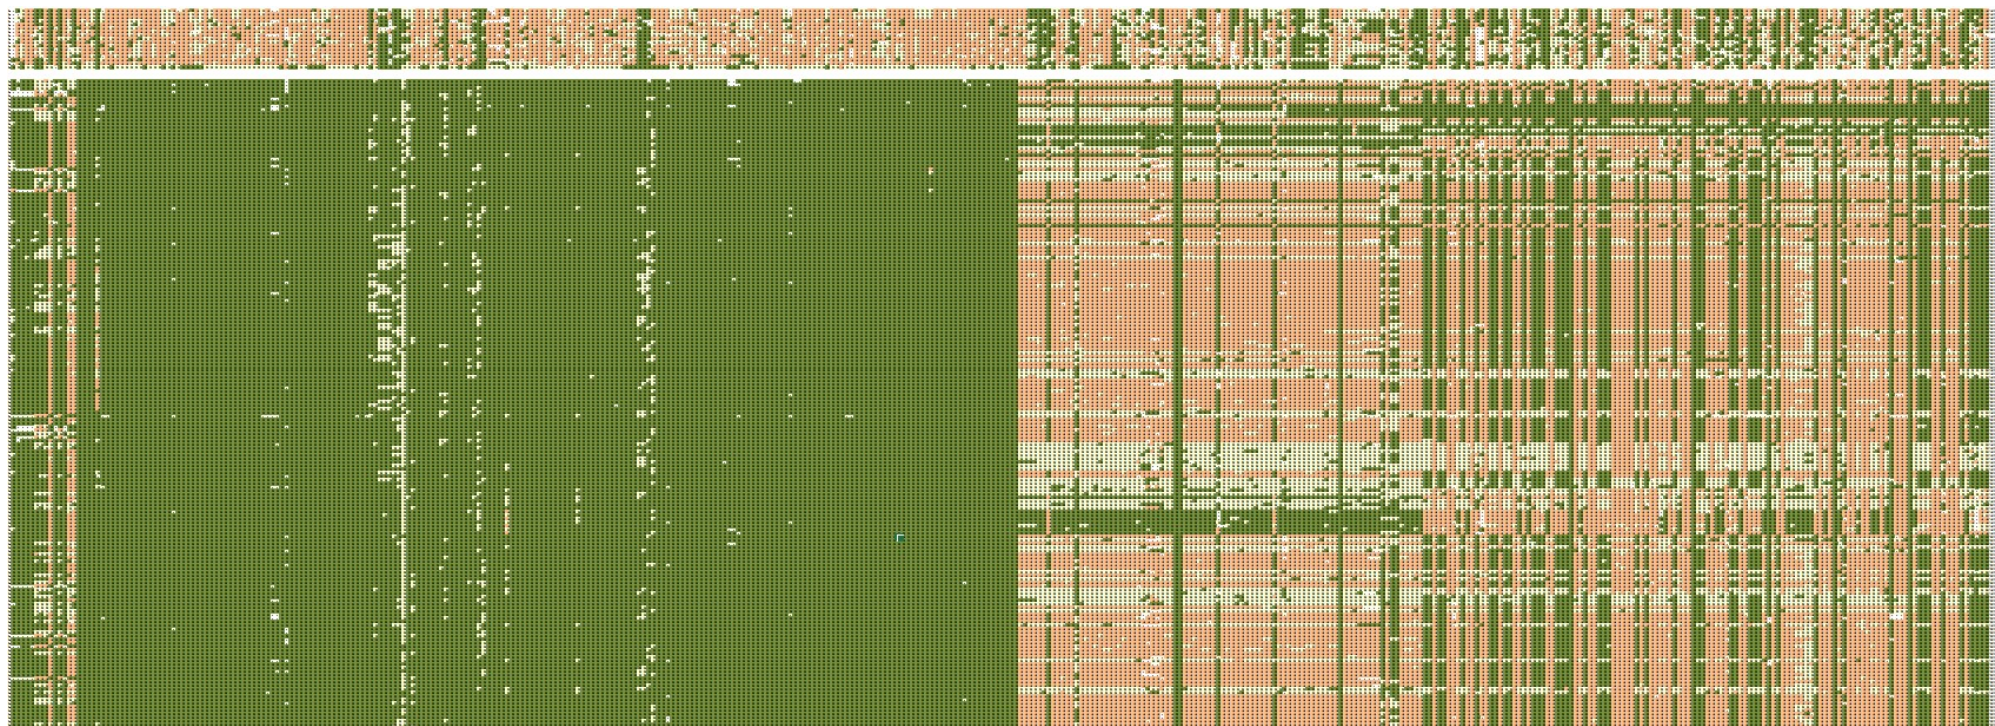

29423300-29556100

Cau.B03G0014330(PREDICTED: histone deacetylase 5-like isoform X3)

Cau.B03G0014340(PREDICTED: protein LSM12 homolog B-like)

Cau.B03G0014350(PREDICTED: slit homolog 1 protein-like)

Cau.B03G0014360(PREDICTED: LOW QUALITY PROTEIN: N-acetylglutamate synthase, mitochondrial-like)

Cau.B03G0014370(PREDICTED: beta-1,4 N-acetylgalactosaminyltransferase 2-like)



Chr33\_10030000-10850000-01

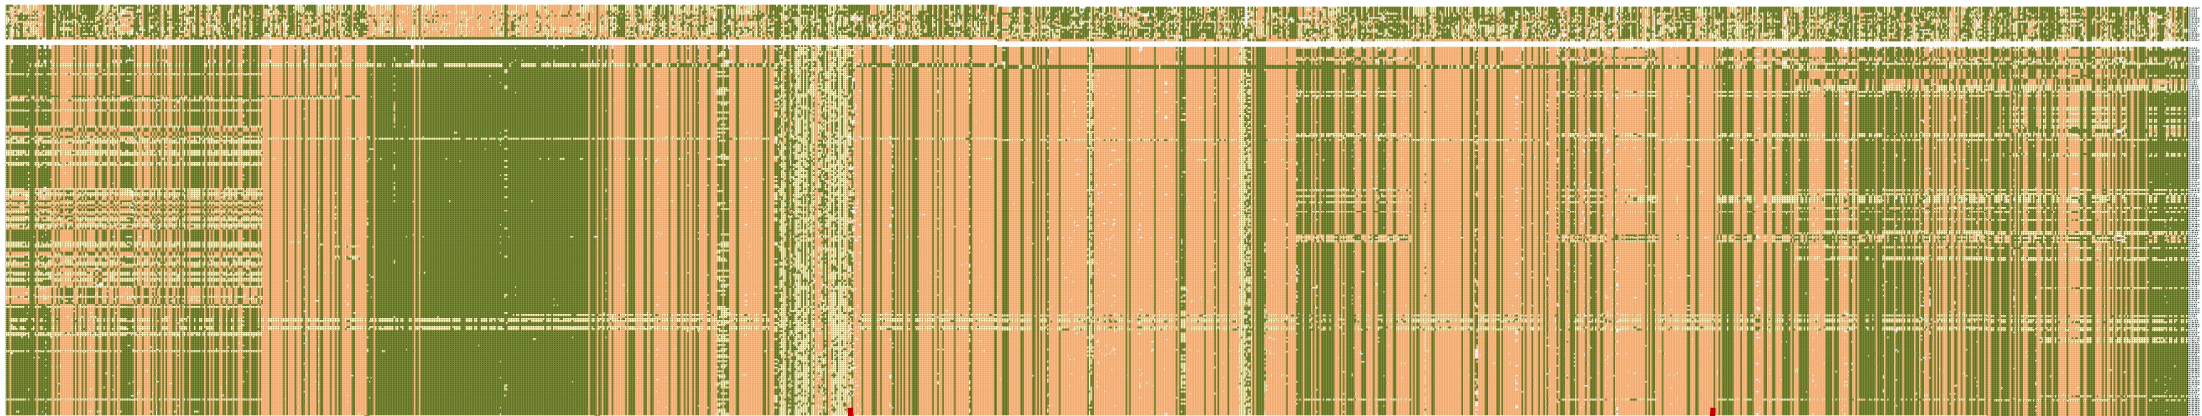

10170000-10260000

- Cau.B08G0005260(zap70)
- Cau.B08G0005280(hypothetical protein cypCar\_00004993)
- Cau.B08G0005290(PREDICTED: MAP kinase-interacting serine/threonine-protein kinase 2-like)
- Cau.B08G0005300(PREDICTED: RNA exonuclease 1 homolog)
- Cau.B08G0005310(PREDICTED: LOW QUALITY PROTEIN: RNA exonuclease 1 homolog)
- Cau.B08G0005320(PREDICTED: diencephalon/mesencephalon homeobox protein 1-B-like isoform X1)
- Cau.B08G0005330(casein kinase I-like)
- Cau.B08G0005340(PREDICTED: casein kinase I isoform X1 )

10340000-10670000

- Cau.B08G0005370(PREDICTED: major facilitator superfamily domain-containing protein 12-like)
- Cau.B08G0005380(PREDICTED: nuclear factor 1, partial)
- Cau.B08G0005390(hypothetical protein cypCar\_00000844)
- Cau.B08G0005410(PREDICTED: LOW QUALITY PROTEIN: fizzy-related protein homolog)
- Cau.B08G0005420(hypothetical protein cypCar\_00018850)
- Cau.B08G0005430(PREDICTED: torsin-1A-interacting protein 1-like isoform X1)
- Cau.B08G0005440(PREDICTED: torsin-1A-interacting protein 2-like isoform X7)
- Cau.B08G0005450(PREDICTED: torsin-1A-interacting protein 2-like isoform X2)
- Cau.B08G0005460(PREDICTED: aldehyde dehydrogenase family 9 member A1-A-like)
- Cau.B08G0005470(PREDICTED: aldehyde dehydrogenase family 9 member A1-A isoform X1)
- Cau.B08G0005480(PREDICTED: transmembrane and coiled-coil domain-containing protein 1-like )

Cau.B08G0005490(PREDICTED: uridine-cytidine kinase 2-A isoform X1)

- Cau.B08G0005500(protein mago nashi homolog)
- Cau.B08G0005510(hypothetical protein cypCar\_00009079)
- Cau.B08G0005520(PREDICTED: protein-serine O-palmitoleyltransferase porcupine-like )
- Cau.B08G0005530(PREDICTED: SPRY domain-containing protein 4-like isoform X1)
- Cau.B08G0005540(PREDICTED: glutaminase kidney isoform, mitochondrial-like)
- Cau.B08G0005550(PREDICTED: uncharacterized protein LOC109083821)
- Cau.B08G0005570(hypothetical protein cypCar\_00035464, partial)
- Cau.B08G0005580(PREDICTED: small integral membrane protein 24-like)
- Cau.B08G0005590(PREDICTED: LOW QUALITY PROTEIN: fizzy-related protein homolog )



Chr35\_22195000-22905000-01

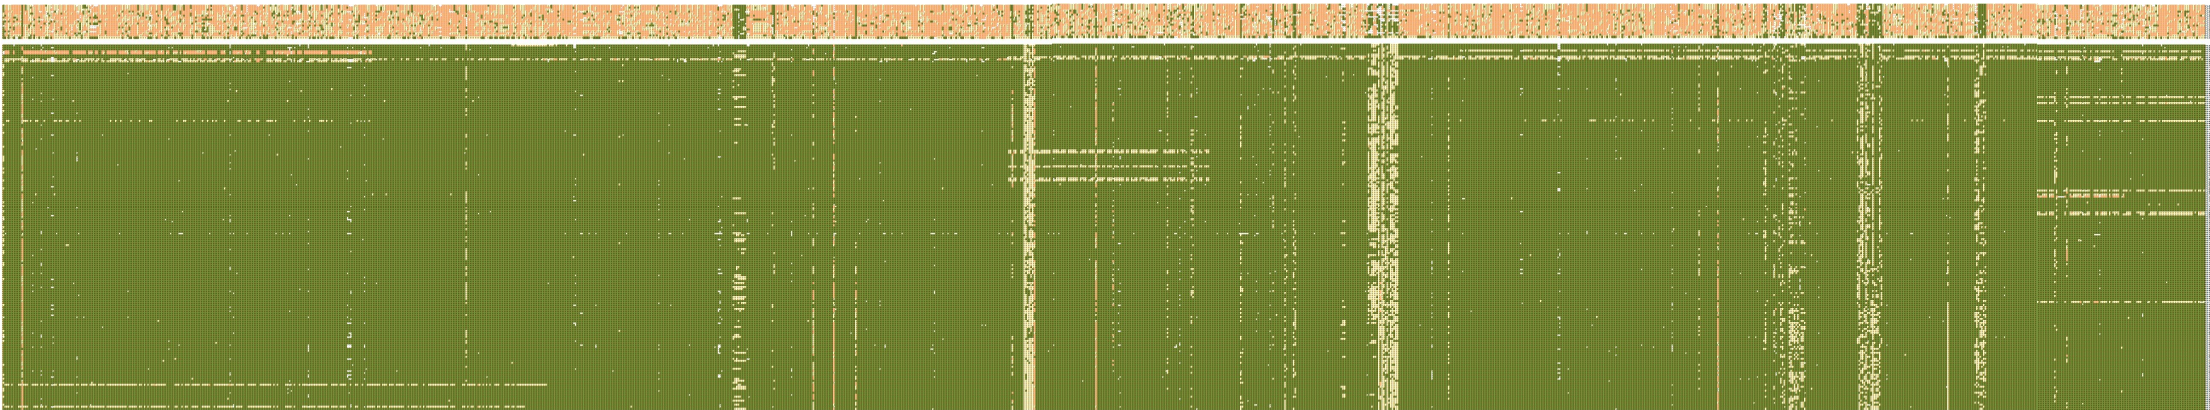

22195000-22420000  
Cau. B10G0010870  
(camk2g2)

22430000-22496660      22540000-22640000  
Cau.B10G0011140(hypothetical protein cypCar\_00029246 )  
Cau.B10G0011150(hypothetical protein cypCar\_00029245 )  
Cau.B10G0011160(huntingtin-interacting protein 1-related protein-like isoform X3 )  
Cau.B10G0011170(PREDICTED: RILP-like protein 1 isoform X4 )  
Cau.B10G0011180(PREDICTED: U11/U12 small nuclear ribonucleoprotein 35 kDa protein-like )  
Cau.B10G0011190(kmt5aa)  
Cau.B10G0011200(sbno1)  
Cau.B10G0011210(cyclin-dependent kinase 2-associated protein 1 isoform X1 )  
Cau.B10G0011220(PREDICTED: M-phase phosphoprotein 9-like isoform X2 )



Chr37\_18865000-19265000-01

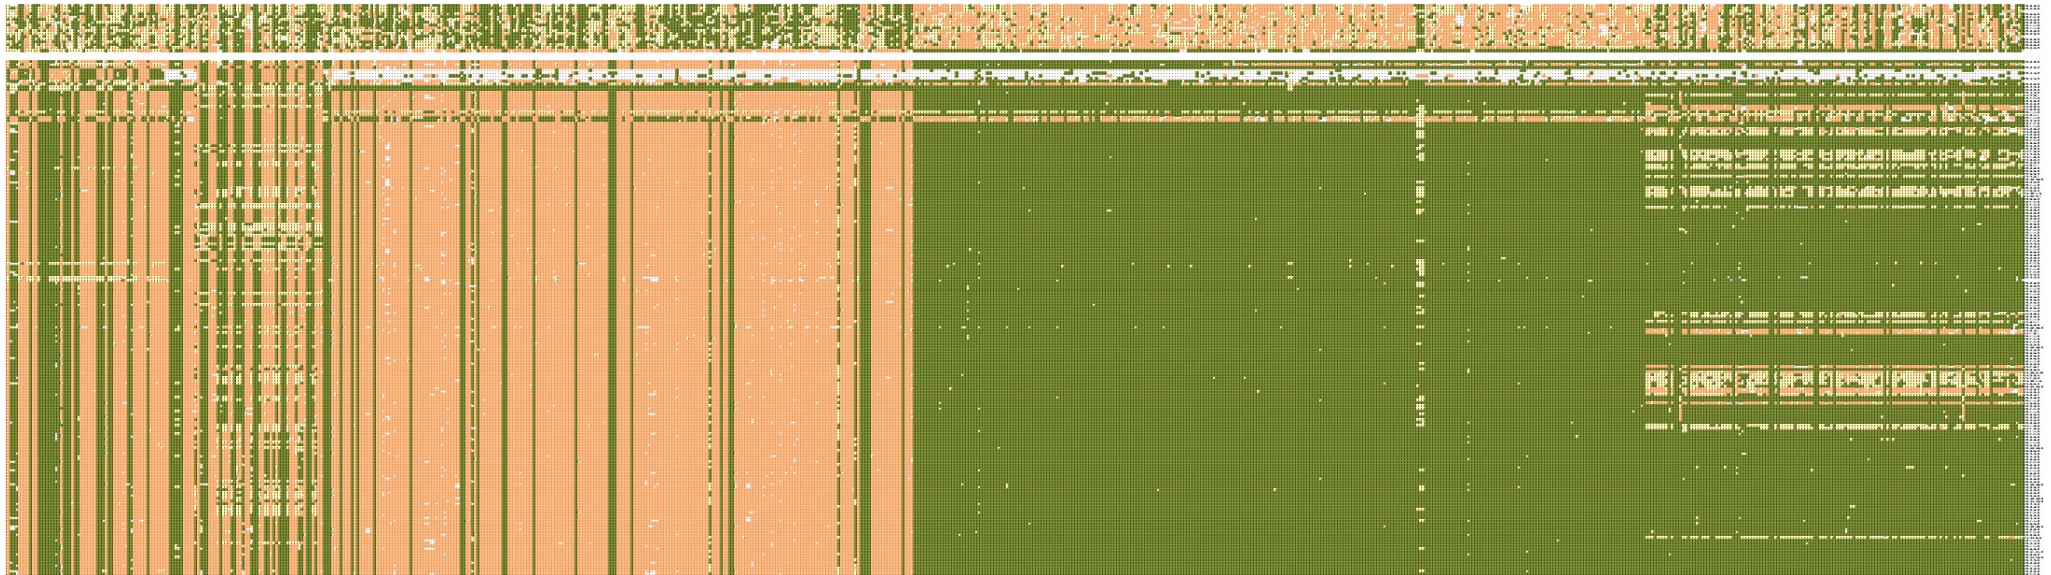

18900000-19038500

- Cau.B12G0008320(PREDICTED: 5-hydroxytryptamine receptor 3A-like)
- Cau.B12G0008330(hypothetical protein cypCar\_00022017)
- Cau.B12G0008340(PREDICTED: ras-related protein Rab-40B)
- Cau.B12G0008350(PREDICTED: syntaxin-binding protein 4 isoform X1)

19038500-19185200

- Cau.B12G0008350(PREDICTED: syntaxin-binding protein 4 isoform X1 )
- Cau.B12G0008370(PREDICTED: hepatic leukemia factor-like isoform X2 )
- Cau.B12G0008380(hypothetical protein cypCar\_00025285 )
- Cau.B12G0008390(PREDICTED: ankyrin repeat and fibronectin type-III domain-containing protein 1-like )
- Cau.B12G0008400(hypothetical protein cypCar\_00025284 )
- Cau.B12G0008410(PREDICTED: ankyrin repeat and fibronectin type-III domain-containing protein 1-like )
- Cau.B12G0008420(nog3)
- Cau.B12G0008430(PREDICTED: ectonucleotide pyrophosphatase/phosphodiesterase family member 7-like )



Chr37\_26035000-26945000-01

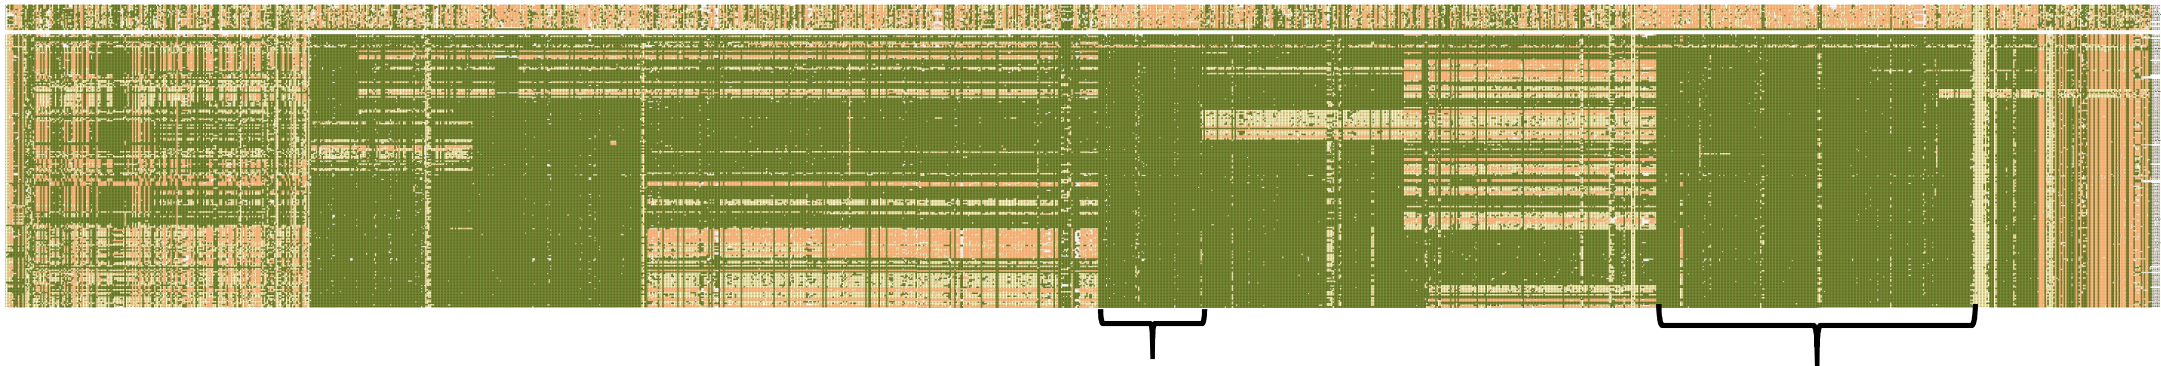

26490000-26546900

Cau.B12G0010930(pald1b)

Cau.B12G0010940(PREDICTED: A disintegrin and metalloproteinase with thrombospondin motifs 14-like )

26746000-26879500

Cau.B12G0011110(PREDICTED: tripartite motif-containing protein 16-like isoform X1 )

Cau.B12G0011120(PREDICTED: leukotriene-B(4) omega-hydroxylase 2-like )

Cau.B12G0011130(PREDICTED: rho GTPase-activating protein SYDE1-like )

Cau.B12G0011140(PREDICTED: alpha-actinin-2-like )

Cau.B12G0011150(PREDICTED: uncharacterized protein LOC107659659 )

Cau.B12G0011160(hypothetical protein cypCar\_00035602 )

Cau.B12G0011170(PREDICTED: LOW QUALITY PROTEIN: matrix metalloproteinase-21 )



Chr38\_26275000-26706000-1

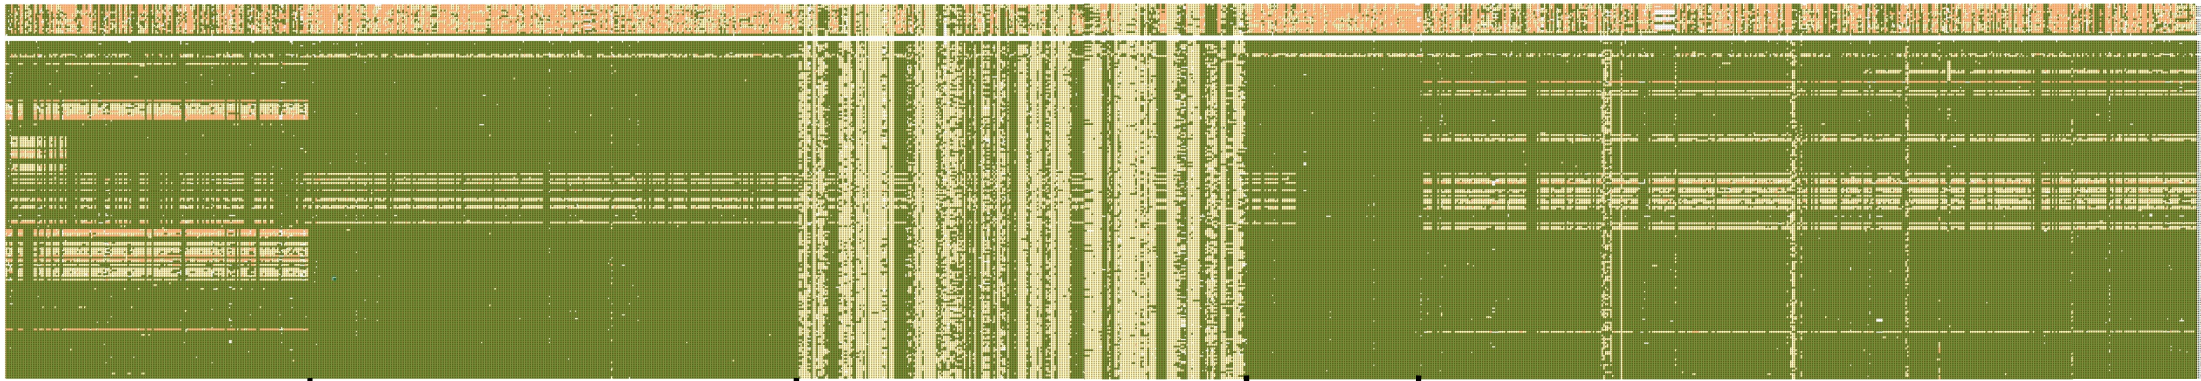

26334000-26432000

Cau.B13G0010600(hypothetical protein cypCar\_00038877, partial)

Cau.B13G0010610(PREDICTED: Hermansky-Pudlak syndrome 1 protein homolog isoform X2)

Cau.B13G0010620(PREDICTED: MORN repeat-containing protein 4)

Cau.B13G0010630(PREDICTED: NK1 transcription factor-related protein 2-like )

Cau.B13G0010640(PREDICTED: cGMP-dependent protein kinase 1-like)

Cau.B13G0010650(hypothetical protein cypCar\_00010494 )

Cau.B13G0010660(PREDICTED: dickkopf-related protein 1-like)

26517000-26556000

Cau.B13G0010680(pcdh15a)

Cau.B13G0010690(pcdh15a)



Chr39\_24805000-24965000-1

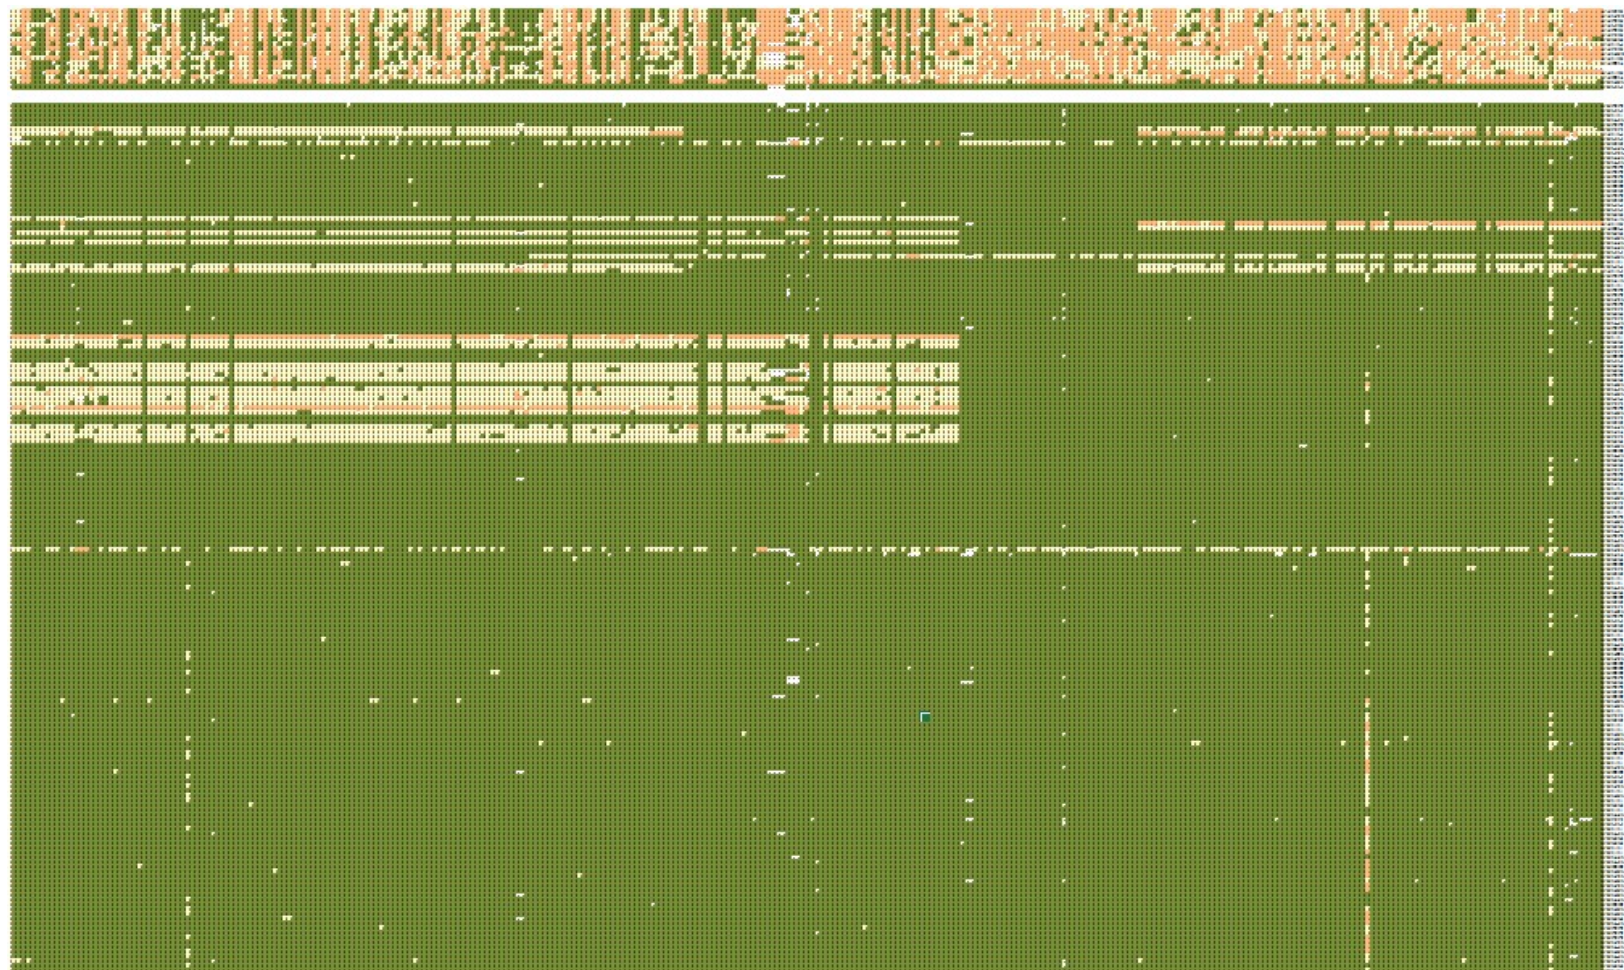

24901000-24965000  
Cau.B14G0009680(PREDICTED: protein FAM122A-like isoform X1)  
Cau.B14G0009690(PREDICTED: hypoxanthine-guanine  
phosphoribosyltransferase-like isoform X1)  
Cau.B14G0009700(PREDICTED: PHD finger protein 6-like)



Chr44\_12995000-13265000-01

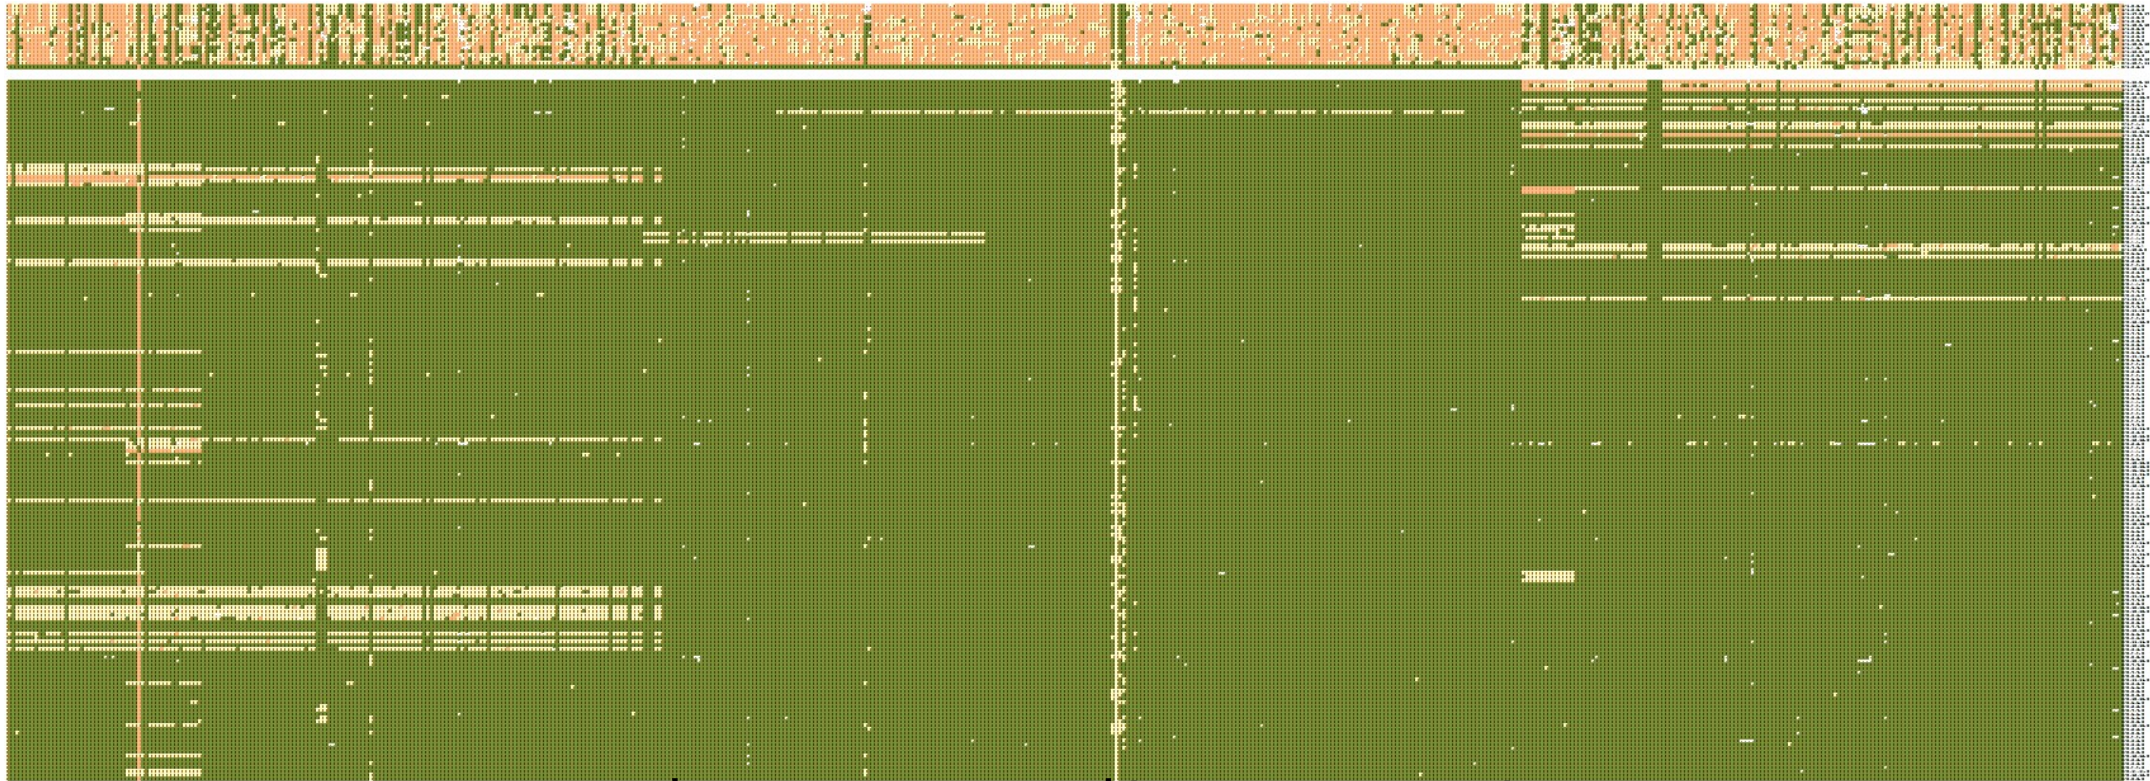

13087900-13135400  
Cau.B19G0006180( chrac1)  
Cau.B19G0006190(PREDICTED: uncharacterized protein  
LOC109073073 )  
Cau.B19G0006200(ago2)  
Cau.B19G0006210(dlx5a)  
Cau.B19G0006220(hypothetical protein cynCar\_00003689)

13139400-13185900  
Cau.B19G0006240(PREDICTED: 26S proteasome complex subunit DSS1 )  
Cau.B19G0006250(PREDICTED: calcium-binding mitochondrial carrier protein Aralar  
isoform X3 )



Chr44\_26955000-27175000-01

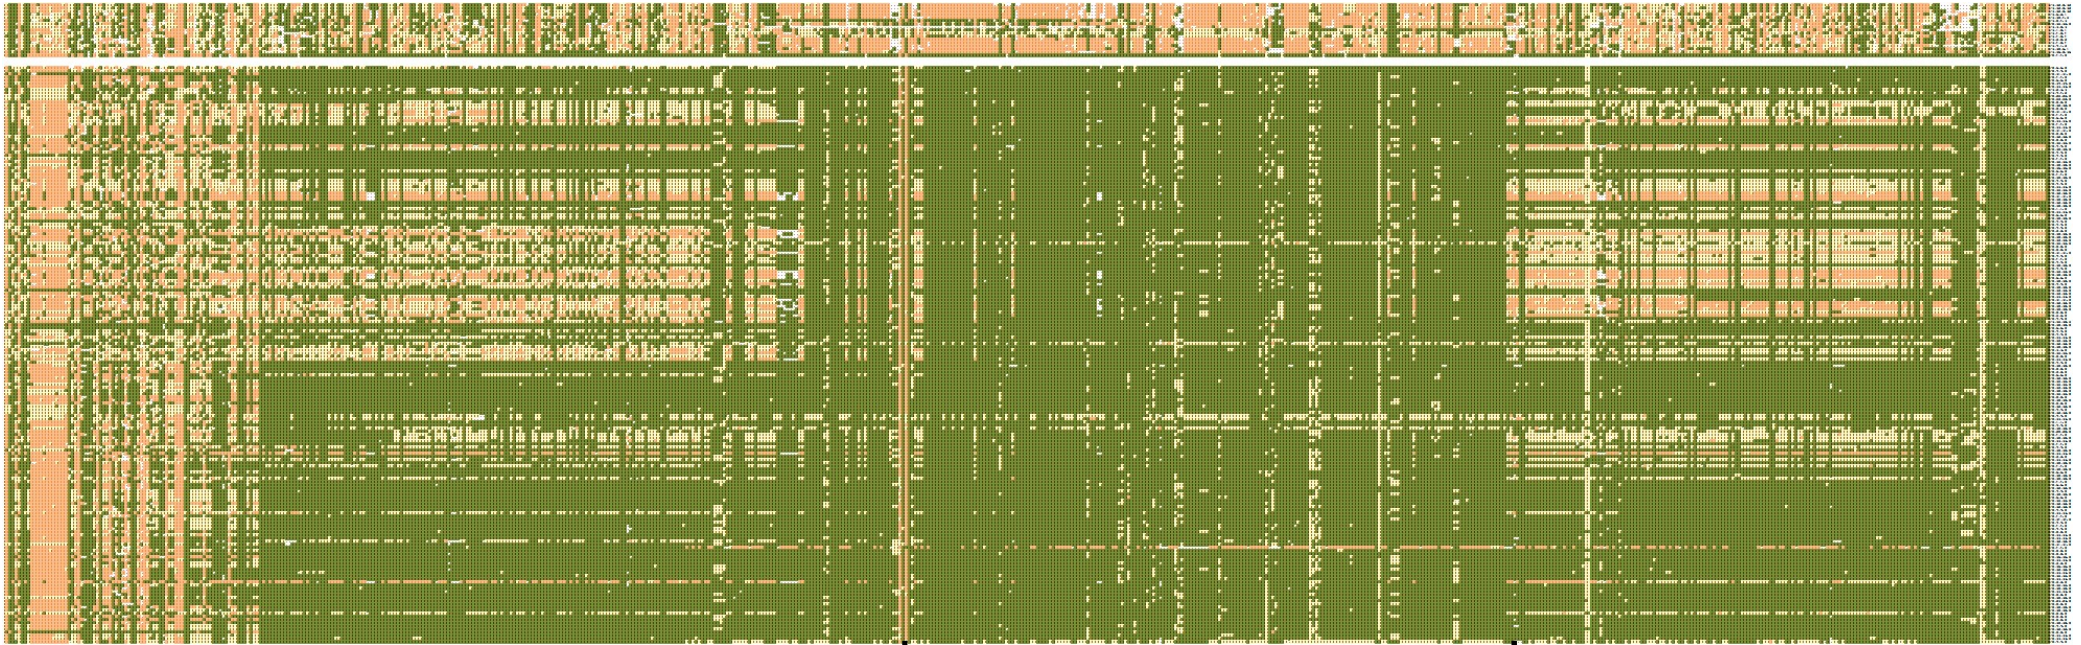

27046000-27112500

Cau.B19G0011680(PREDICTED: uncharacterized protein LOC109062268 )

Cau.B19G0011700(PREDICTED: uncharacterized protein LOC109080583 )



Chr45\_17385000-18605000-01

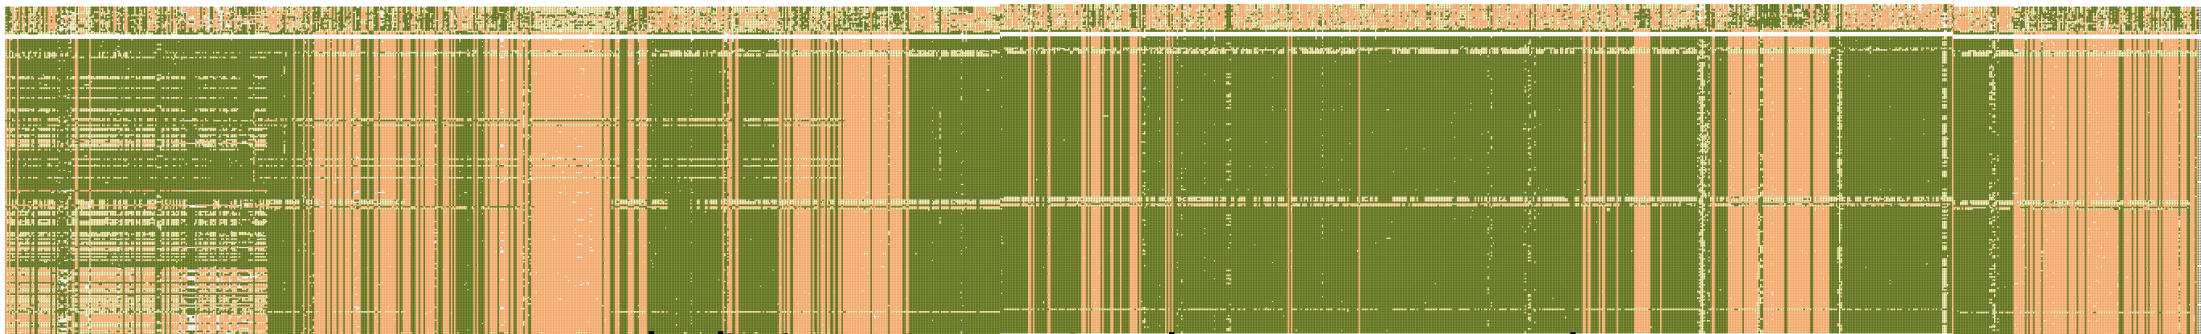

17728500-17766700

Cau.B20G0006680(PREDICTED: NHS-like protein 1 isoform X5 )  
Cau.B20G0006690(PREDICTED: NHS-like protein 1 isoform X8 )  
Cau.B20G0006700

17770700-17804900

Cau.B20G0006720  
Cau.B20G0006730  
Cau.B20G0006740

17814900-17826400

Cau.B20G0006750(PREDICTED: fibronectin type III domain-containing protein 1-like )

17886400-18116400

Cau.B20G0006790(PREDICTED: otoferlin-like isoform X1 )  
Cau.B20G0006800(PREDICTED: hippocalcin-like protein 1 )  
Cau.B20G0006810(PREDICTED: apolipoprotein B-100-like )  
Cau.B20G0006820(PREDICTED: uronyl 2-sulfotransferase-like )  
Cau.B20G0006830(PREDICTED: uronyl 2-sulfotransferase-like )  
Cau.B20G0006840(hypothetical protein cypCar\_00013933 )  
Cau.B20G0006850

18246400-18346800

Cau.B20G0006860(hypothetical protein cypCar\_00004543 )  
Cau.B20G0006870(hypothetical protein cypCar\_00004543 )  
Cau.B20G0006880(syntaxin-binding protein 5 )  
Cau.B20G0006890(PREDICTED: syntaxin-binding protein 5-like )



Chr45\_19145000-19715000-01

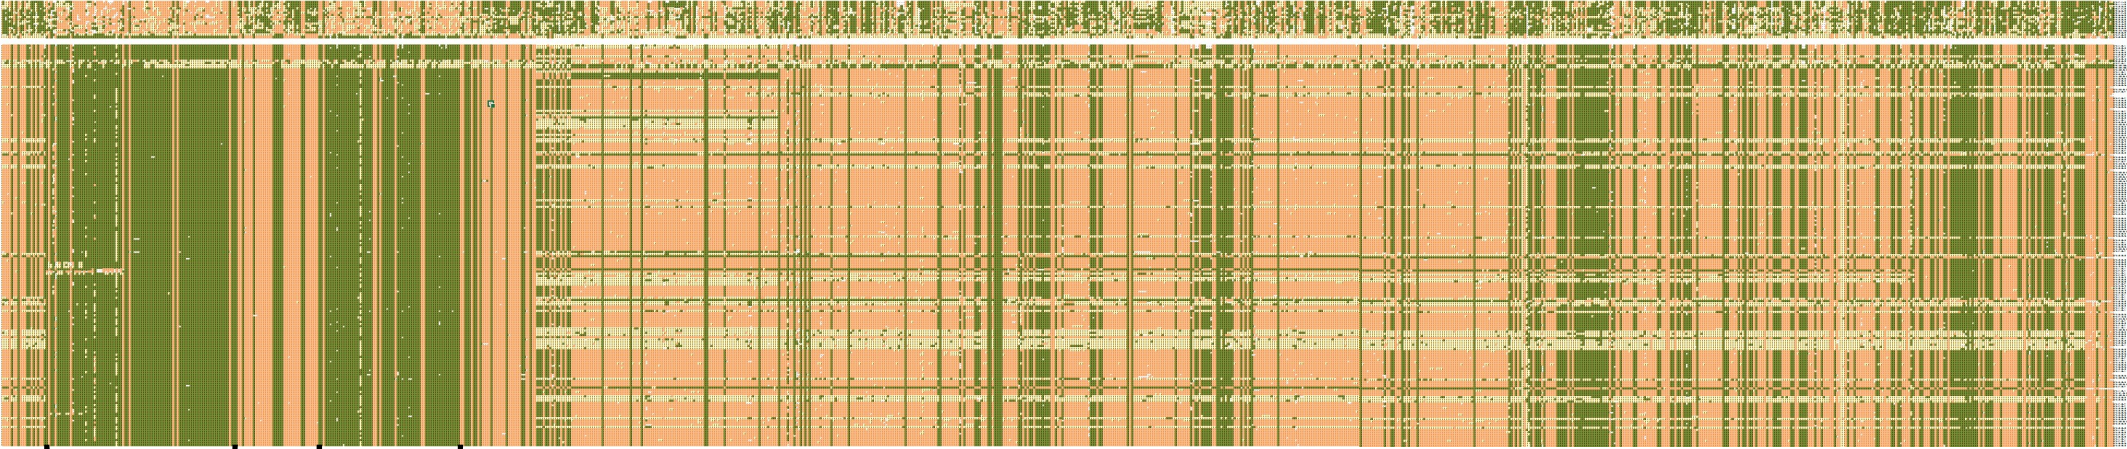

19165000-19205000  
**Cau.B20G0007000**  
(PREDICTED: androglobin)

19235000-19247000  
Cau.B20G0007010(PREDICTED: ras-related protein Rab-32)



Chr50\_20875000-21435000-01

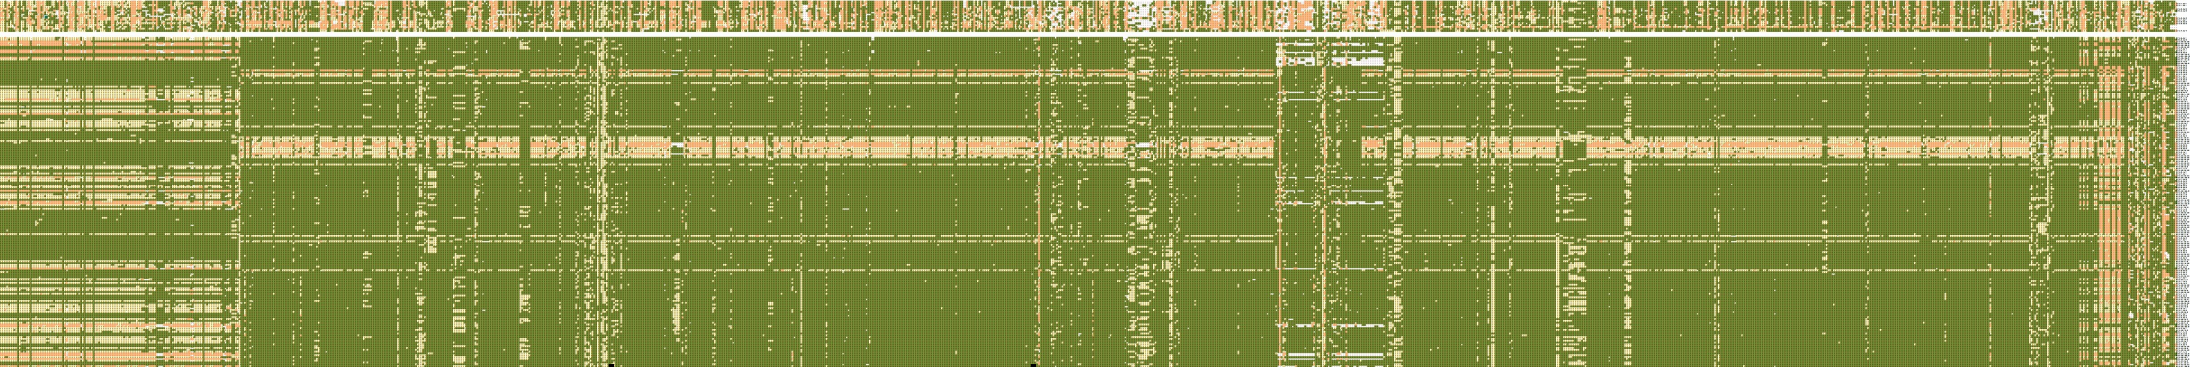

**21043000-21139000**

- Cau.B25G0011050(PREDICTED: SRSF protein kinase 3-like, partial)
- Cau.B25G0011060(PREDICTED: SRSF protein kinase 2-like)
- Cau.B25G0011080(PREDICTED: 40S ribosomal protein S17)
- Cau.B25G0011130(PREDICTED: 40S ribosomal protein S17-like)
- Cau.B25G0011140(PREDICTED: PCNA-associated factor-like)
- Cau.B25G0011160(PREDICTED: uncharacterized protein LOC109068379)
- Cau.B25G0011170(PREDICTED: mitogen-activated protein kinase kinase 3-like isoform X1)

**21235000-21379000**

- Cau.B25G0011200(PREDICTED: disintegrin and metalloproteinase domain-containing protein 10-like)
- Cau.B25G0011220(aquaporin 9a-1)
- Cau.B25G0011250(PREDICTED: hepatic triacylglycerol lipase-like)
- Cau.B25G0011260(PREDICTED: disintegrin and metalloproteinase domain-containing protein 10-like)
