# Supplementary material
Source: PubMed Central journal article supplement (PMC7703540)
Supplement: pnas.2005545117.sd06.pdf [file pnas.2005545117.sd06.pdf]

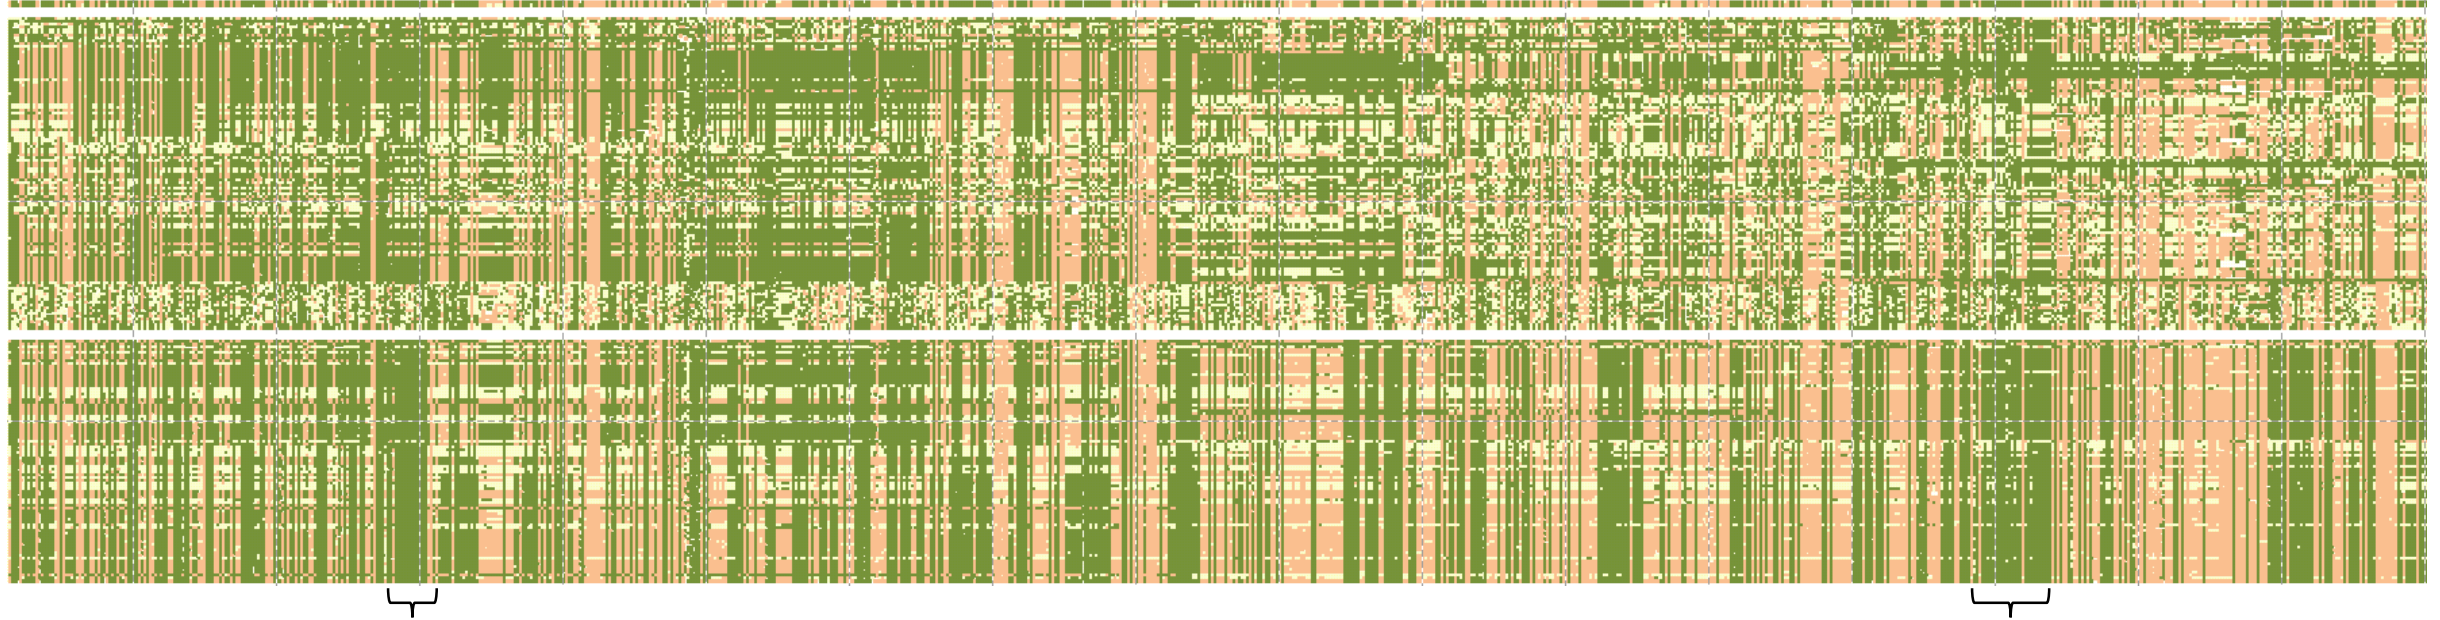

27520881-27522614

Cau. A02G0011900 (Cyprinus carpio genome assembly common carp genome , scaffold LG41 )

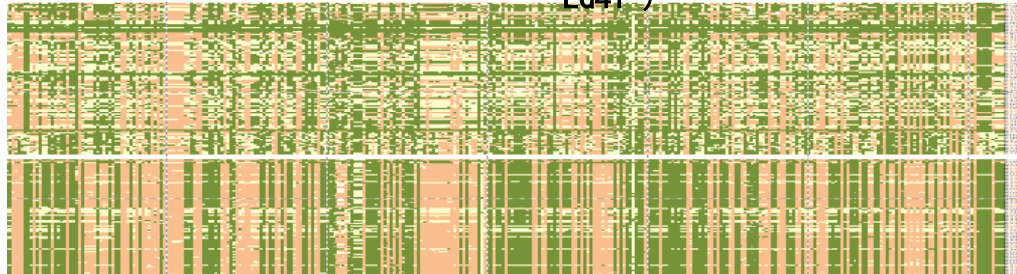

27651467-276553191

Cau. A02G0011950 (PREDICTED: kinesin-1 heavy chain-like isoform X3, kif5ba)

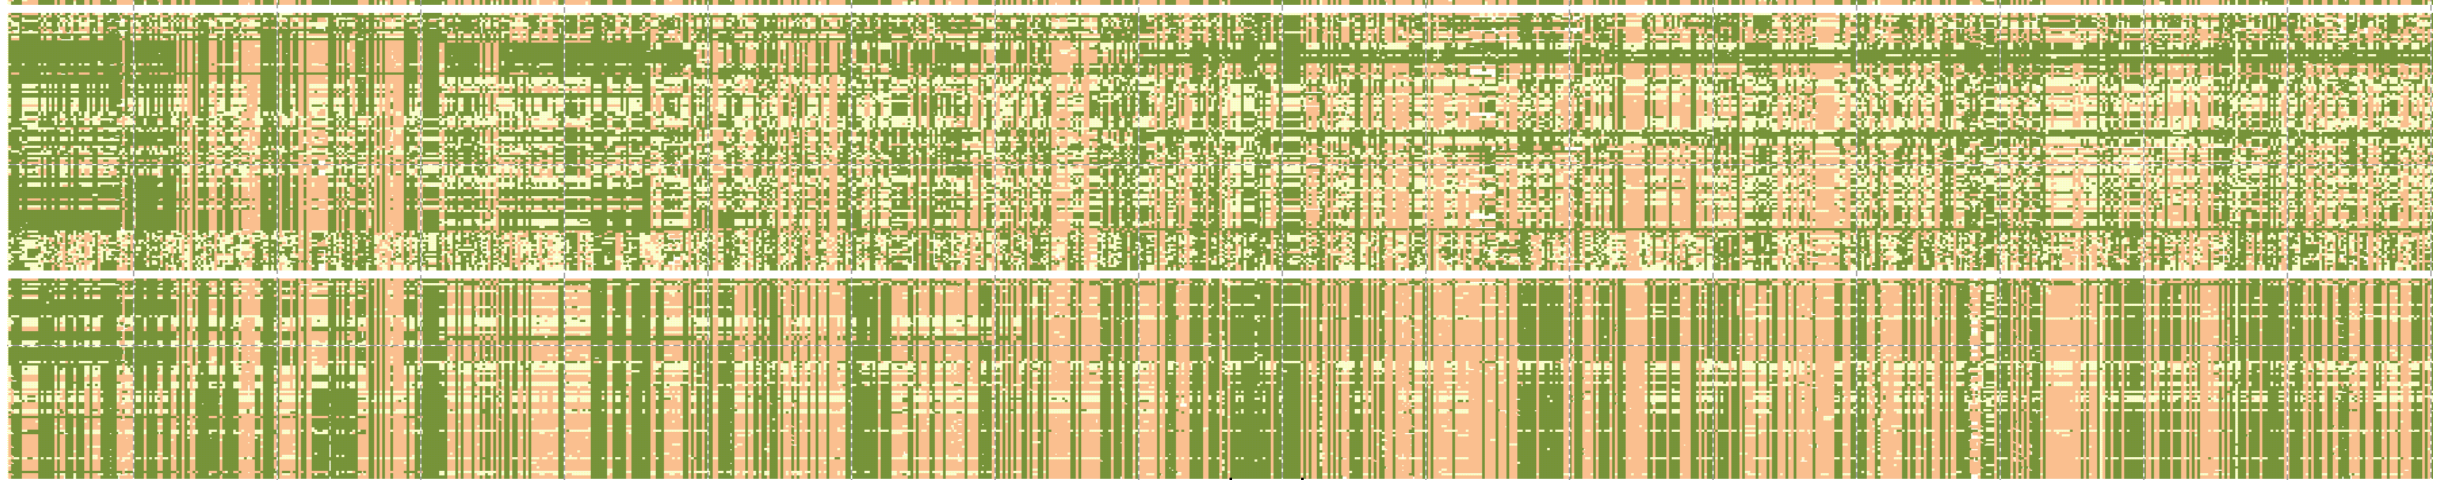

27676698-27683047

Cau. A02G0011980 (PREDICTED: rho GTPase-activating protein 12-like isoform X3)

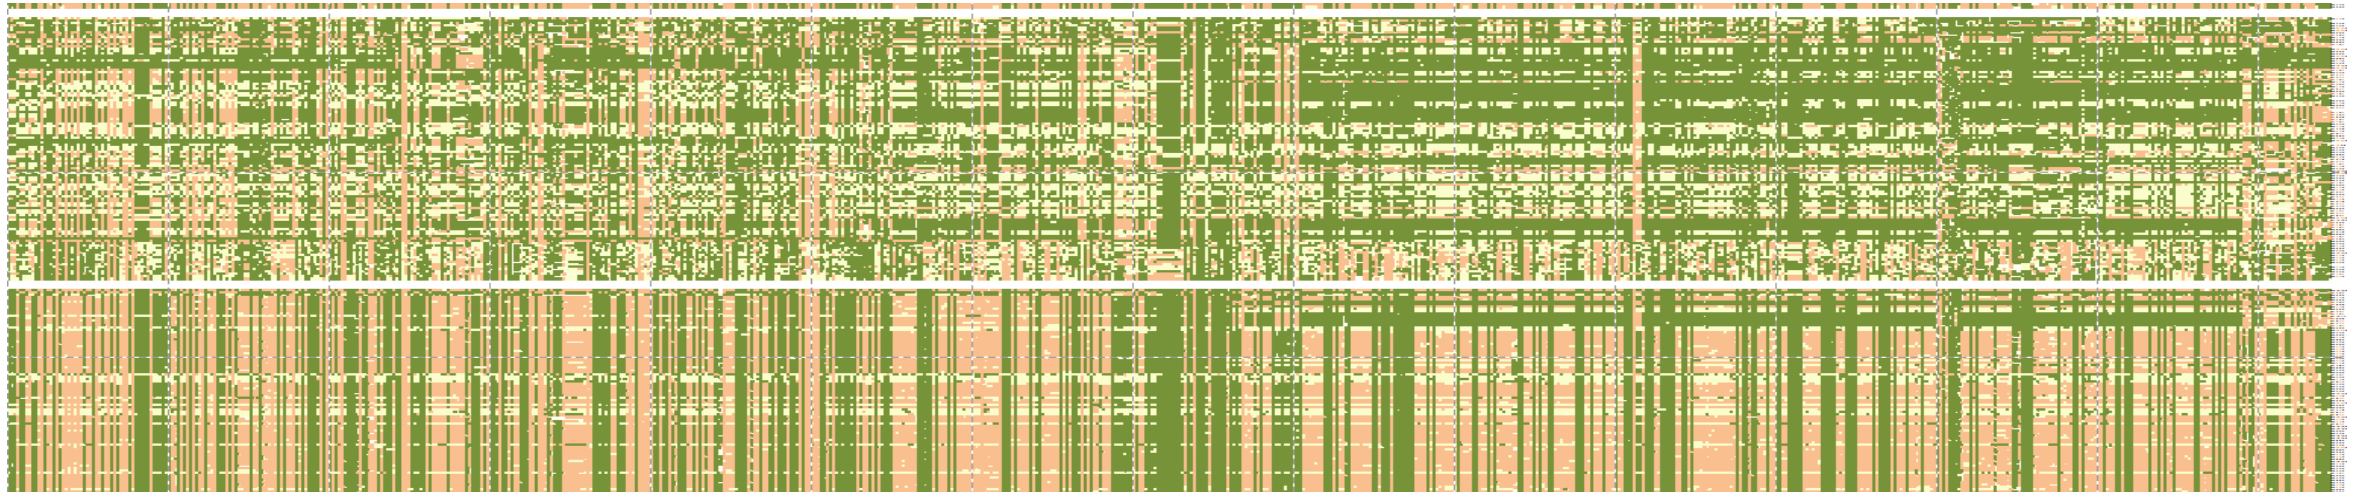

27905269-27909079

Cau. A02G0012070 (PREDICTED: sodium/potassium-transporting ATPase subunit alpha-2)

Cau. A02G0012090 (PREDICTED: DNA ligase 1 isoform X1)



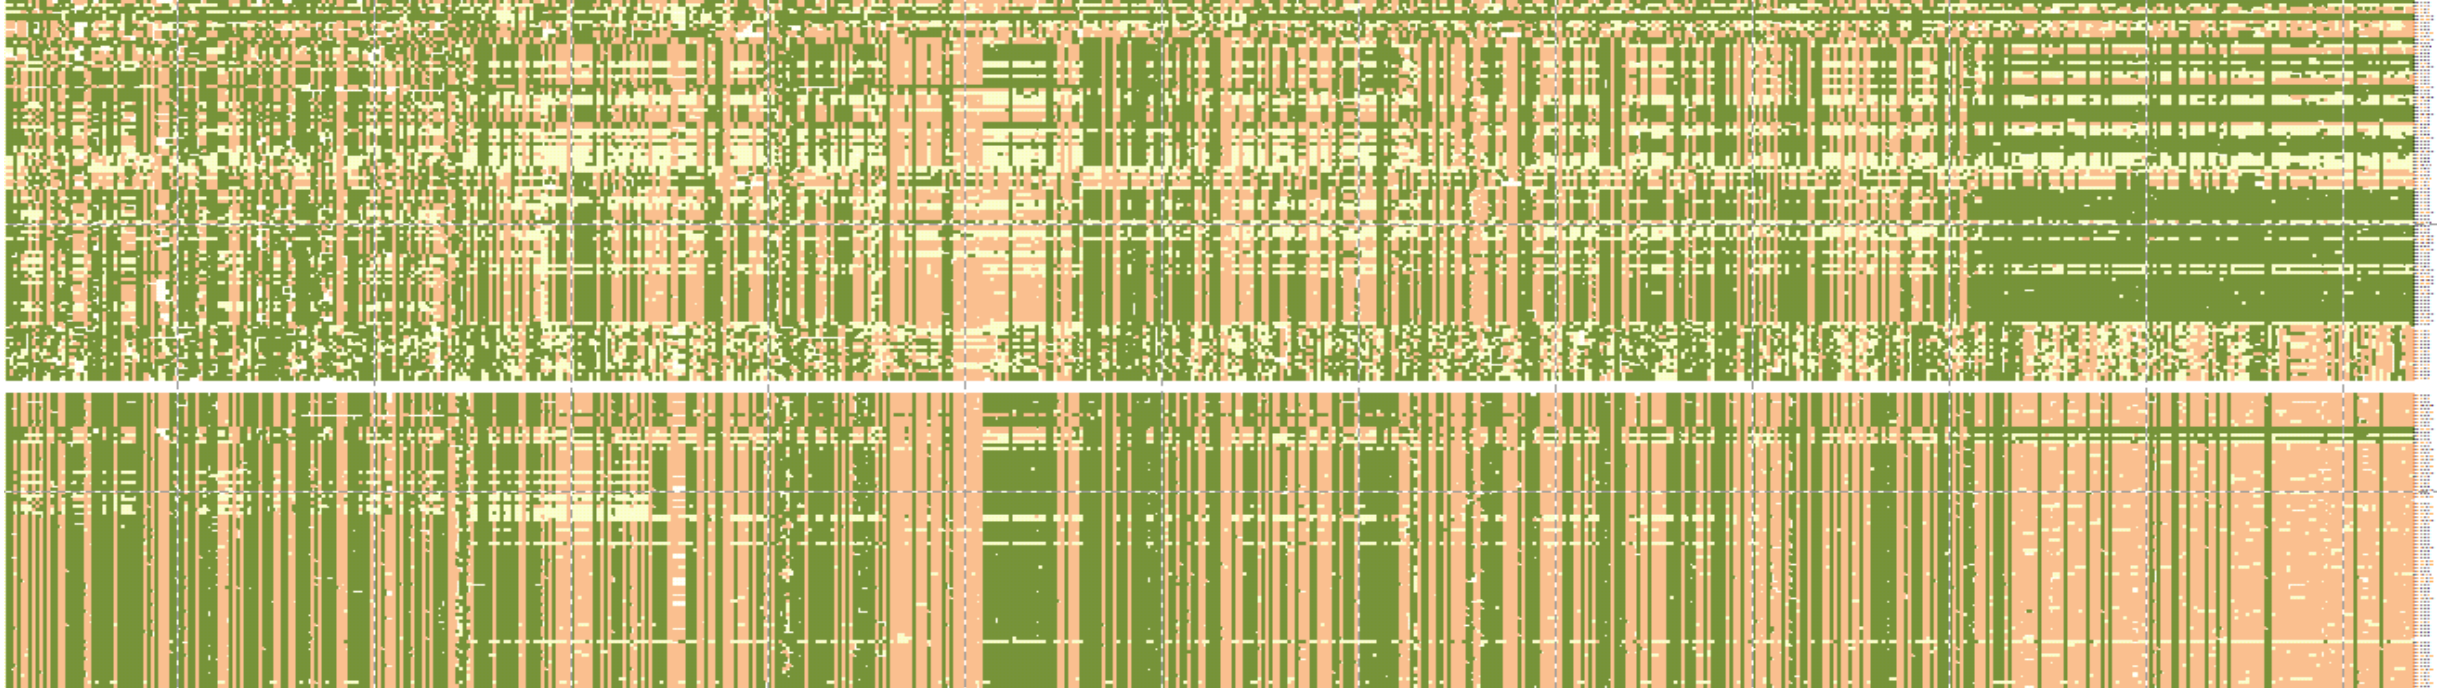

984815-992248

Cau. A04G0000710 (PREDICTED: cytidine monophosphate-N-acetylneuraminic acid hydroxylase) **nr**  
PREDICTED: Danio rerio cytidine monophospho-N-acetylneuraminic acid hydroxylase (cmah), transcript variant X1, mRNA **nt**

Chr5\_3A37243927-37552653-01

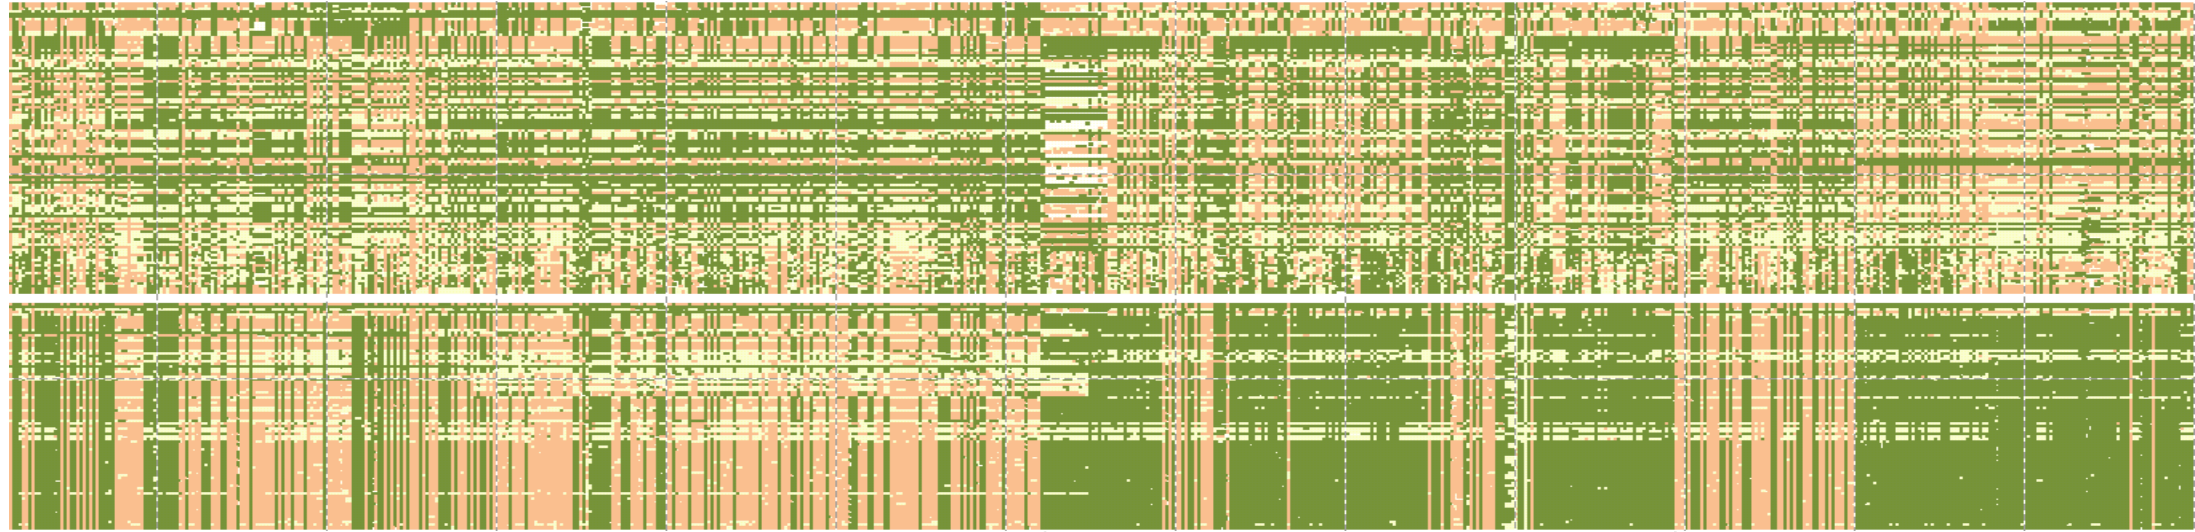

37338066-37396211  
non-coding

37407783-37444665  
non-coding

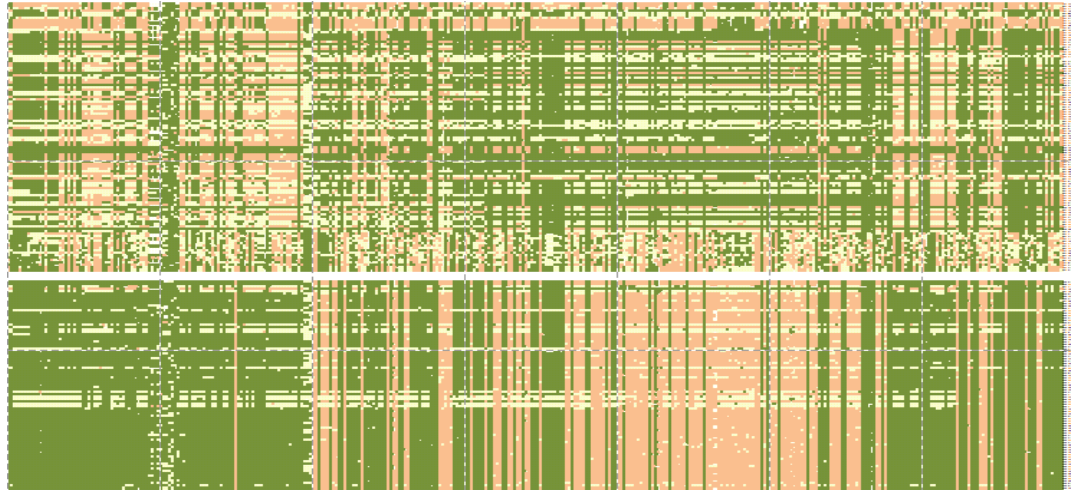

37444665-37475121  
non-coding

37534651-37541573  
non-coding



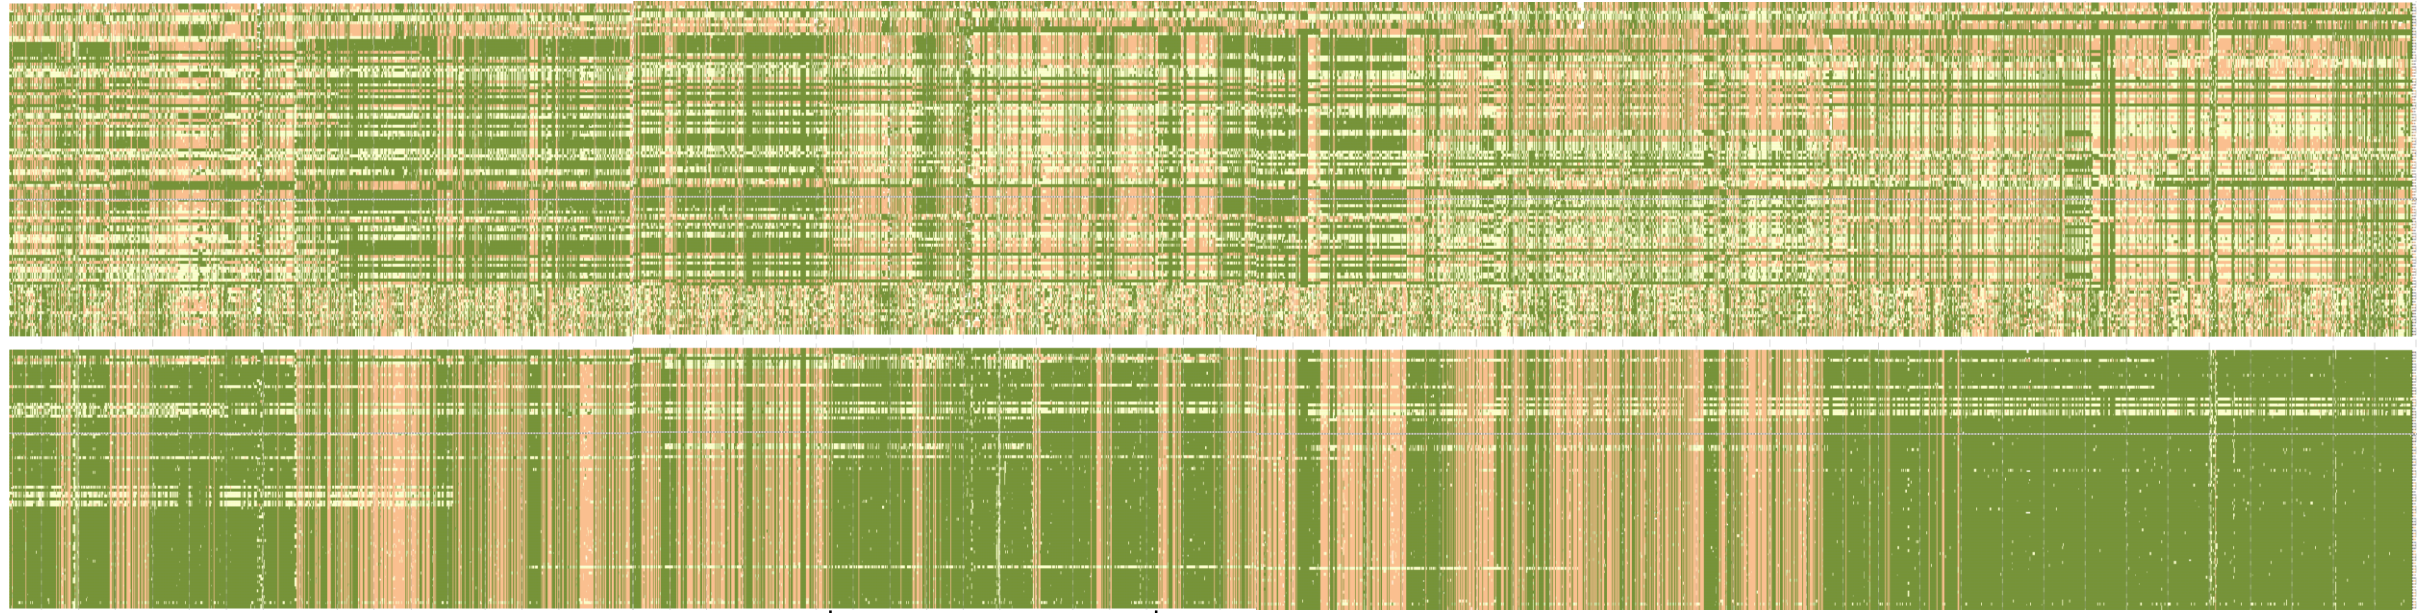

37360441-37487600  
non-coding

37711600-37839600  
non-coding

38127600-38383600  
Cau. A05G0015500 (PREDICTED: coiled-coil domain-containing protein 117-like)  
Cau. A05G0015530 (PREDICTED: transport and Golgi organization protein 2 homolog)

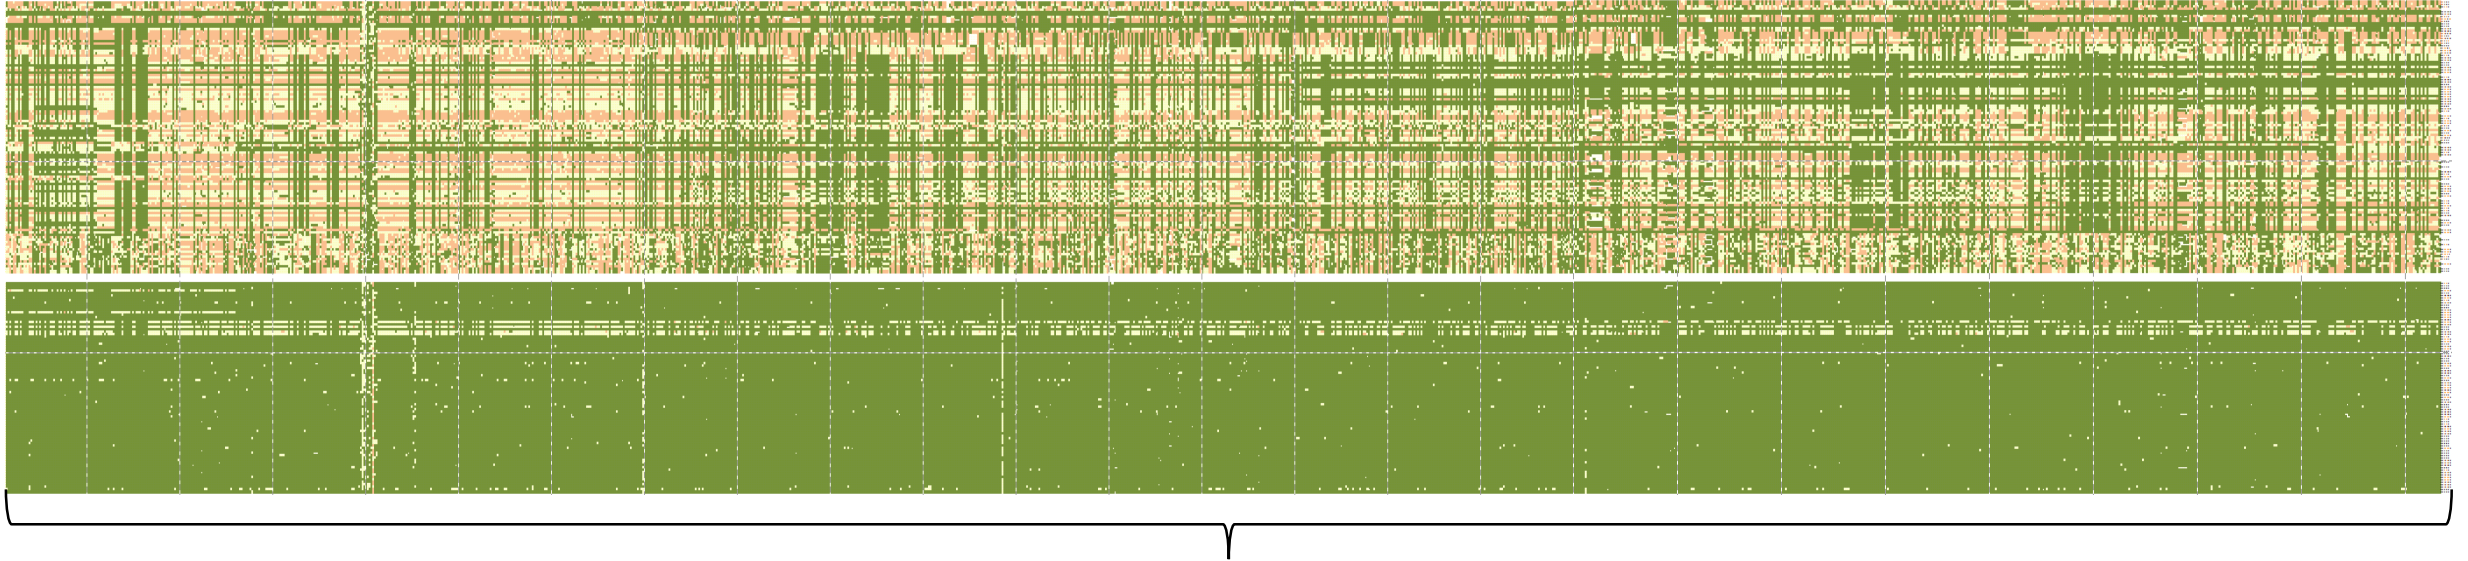

38225795-38603594

- Cau. A05G0015500 (PREDICTED: coiled-coil domain-containing protein 117-like)
- Cau. A05G0015510
- Cau. A05G0015520
- Cau. A05G0015530 (PREDICTED: transport and Golgi organization protein 2 homolog)
- Cau. A05G0015540 (PREDICTED: LOW QUALITY PROTEIN: armadillo repeat protein deleted in velo-cardio-facial syndrome homolog)
- Cau. A05G0015550
- Cau. A05G0015560
- Cau. A05G0015570
- Cau. A05G0015580
- Cau. A05G0015590 (PREDICTED: MARVEL domain-containing protein 2-like)
- Cau. A05G0015600 (PREDICTED: adenylate kinase isoenzyme 6-like)
- Cau. A05G0015610 (PREDICTED: cell cycle checkpoint protein RAD17-like)
- Cau. A05G0015620 (PREDICTED: LOW QUALITY PROTEIN: coiled-coil domain-containing protein 125-like)
- Cau. A05G0015630 (PREDICTED: ankyrin repeat domain-containing protein 34B-like)
- Cau. A05G0015640 (hypothetical protein cypCar\_00010385)
- Cau. A05G0015650 (hypothetical protein cypCar\_00010386)
- Cau. A05G0015660 (PREDICTED: beta, beta-carotene 9',10'-oxygenase-like)
- Cau. A05G0015670 (PREDICTED: chymotrypsin-like elastase family member 2A isoform X1)



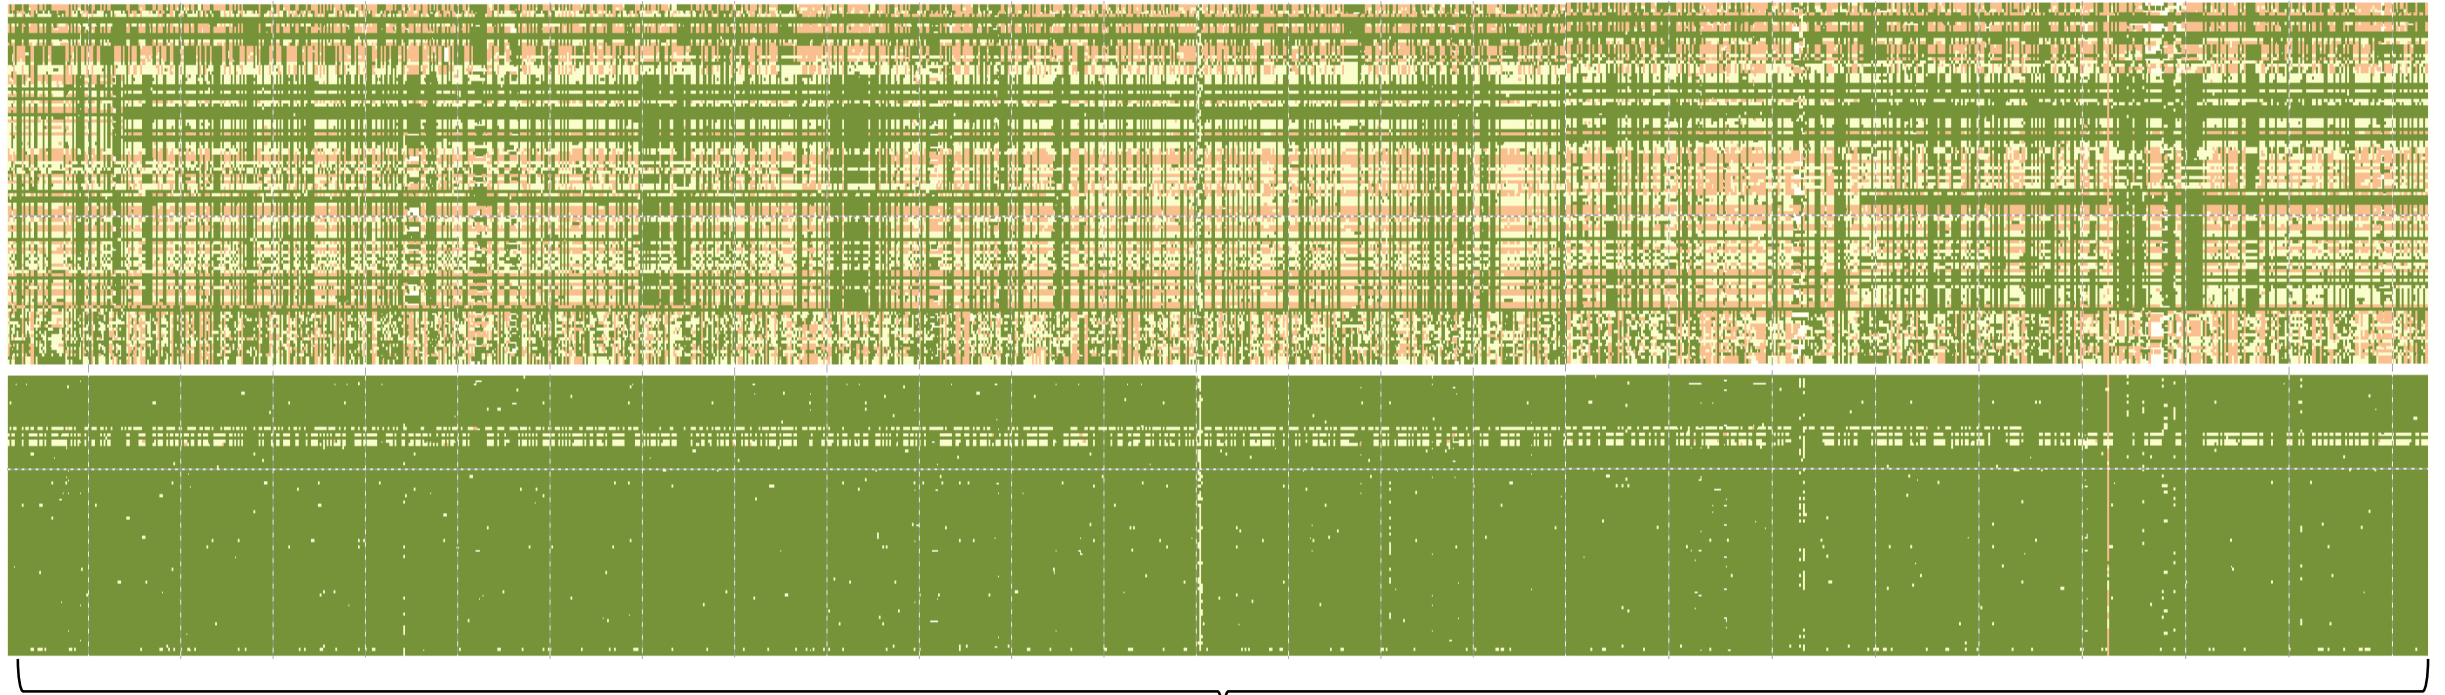

38455780-38794813

- Gau. A05G0015540 (PREDICTED: LOW QUALITY PROTEIN: armadillo repeat protein deleted in velo-cardio-facial syndrome homolog)
- Gau. A05G0015590 (PREDICTED: MARVEL domain-containing protein 2-like)
- Gau. A05G0015600 (PREDICTED: adenylate kinase isoenzyme 6-like)
- Gau. A05G0015610 (PREDICTED: cell cycle checkpoint protein RAD17-like )
- Gau. A05G0015620 (PREDICTED: LOW QUALITY PROTEIN: coiled-coil domain-containing protein 125-like )
- Gau. A05G0015630 (PREDICTED: ankyrin repeat domain-containing protein 34B-like )
- Gau. A05G0015640 (hypothetical protein cypCar\_00010385 )
- Gau. A05G0015650 (hypothetical protein cypCar\_00010386 )
- Gau. A05G0015660 (PREDICTED: beta,beta-carotene 9&apos;, 10&apos;-oxygenase-like )
- Gau. A05G0015670 (PREDICTED: chymotrypsin-like elastase family member 2A isoform X1 )
- Gau. A05G0015680 (PREDICTED: protein FAM219A-like isoform X1 )
- Gau. A05G0015690 (PREDICTED: Krueppel-like factor 9 )
- Gau. A05G0015700 (PREDICTED: transient receptor potential cation channel subfamily M member 3-like )
- Gau. A05G0015710 (PREDICTED: transient receptor potential cation channel subfamily M member 3-like )

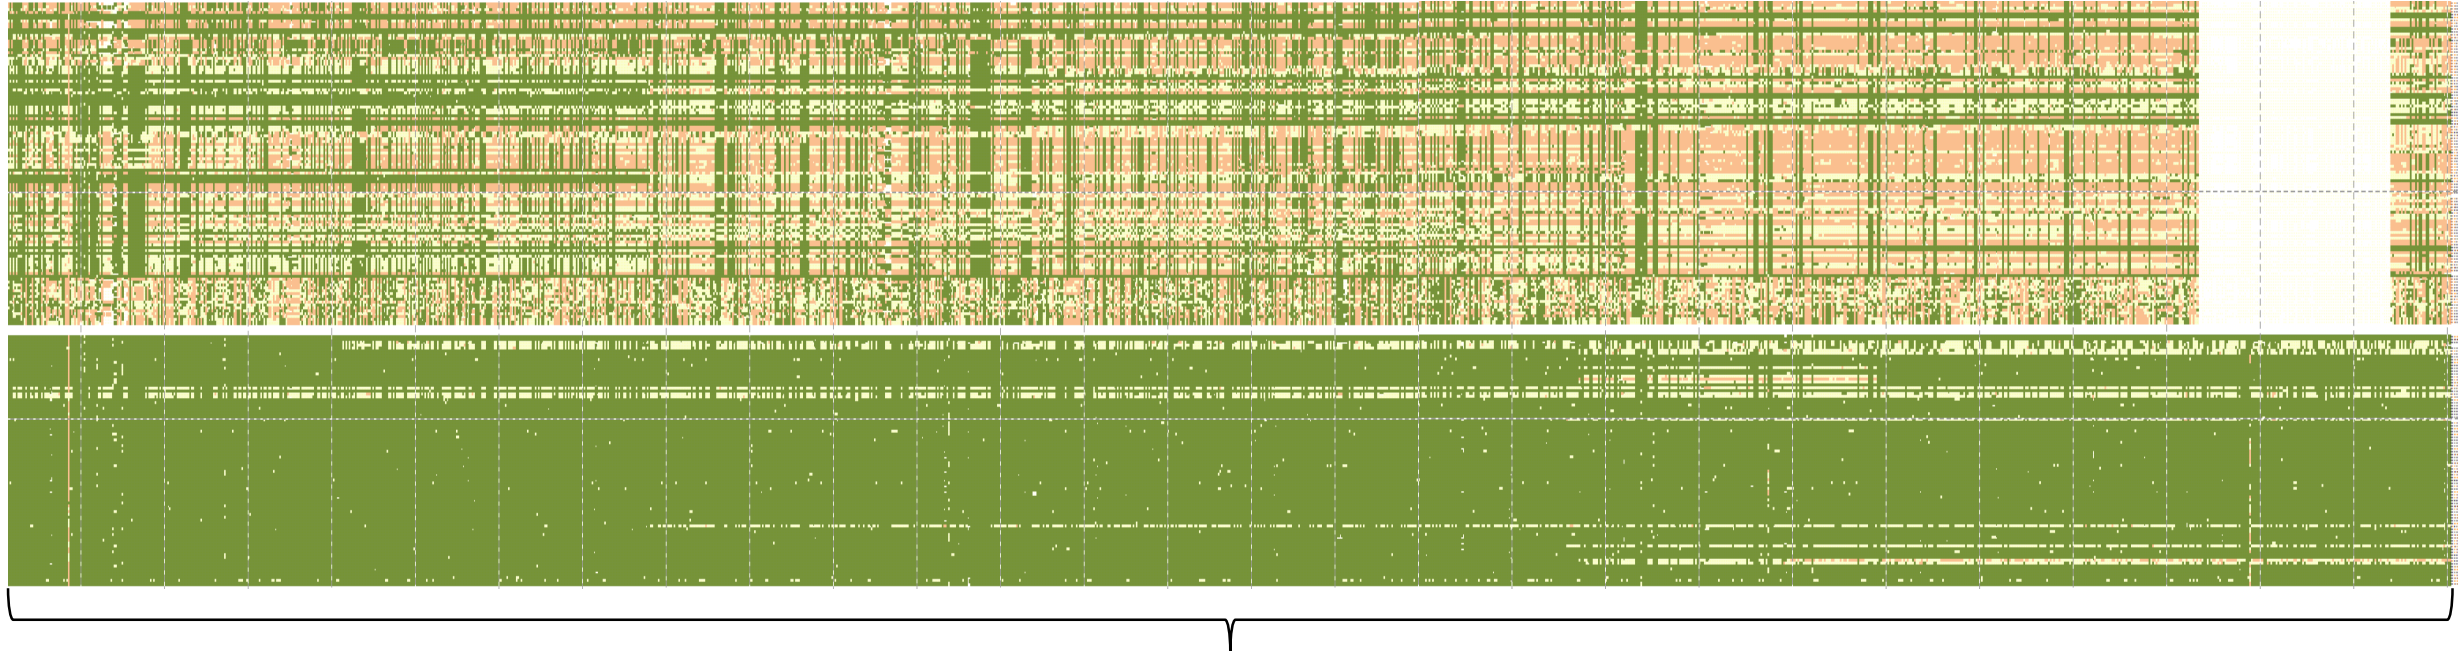

38717881-39057000

- Gau. A05G0015780 (PREDICTED: AN1-type zinc finger protein 5-like isoform X1 )
- Gau. A05G0015790 (PREDICTED: transmembrane channel-like protein 1 )
- Gau. A05G0015800 (PREDICTED: LOW QUALITY PROTEIN: kinesin-like calmodulin-binding protein homolog )
- Gau. A05G0015810 (hypothetical protein cypCar\_00014738 )
- Gau. A05G0015820 (PREDICTED: annexin A1-like )
- Gau. A05G0015830 (PREDICTED: major facilitator superfamily domain-containing protein 3-like )



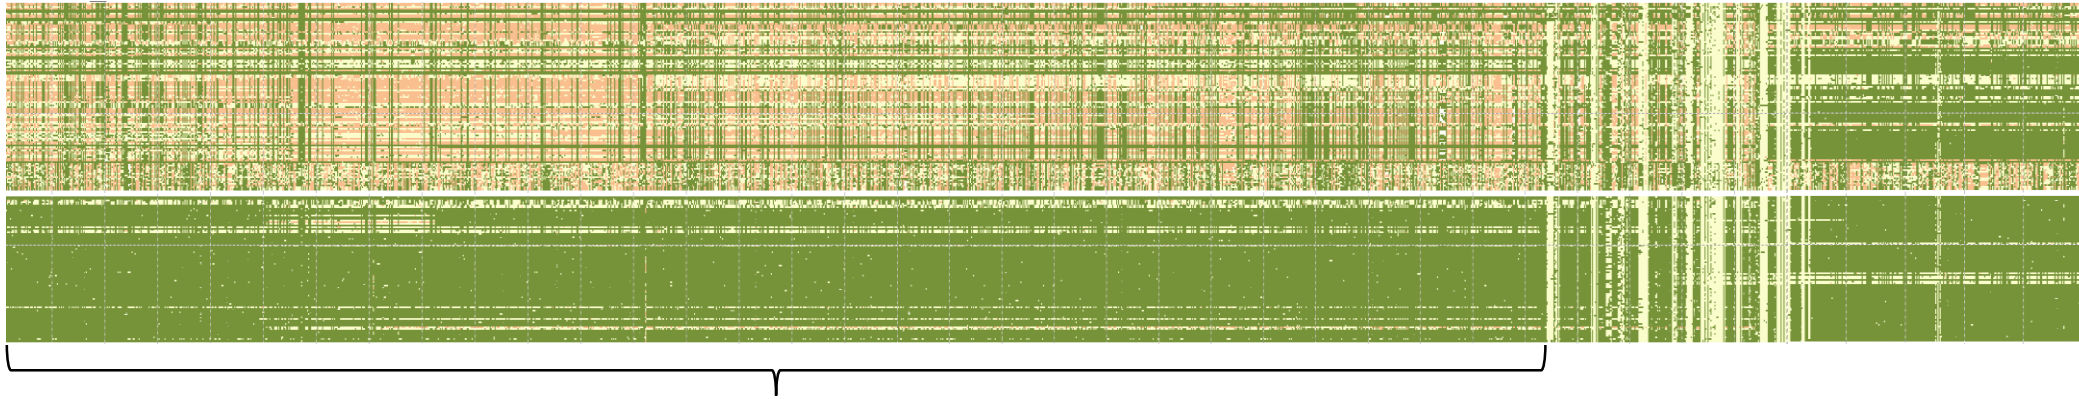

38902648-39255000

- Gau. A05G0015840 (PREDICTED: nuclear receptor ROR-beta-like isoform X1 )
- Gau. A05G0015850 (PREDICTED: transient receptor potential cation channel subfamily M member 6-like isoform X1 )
- Gau. A05G0015870 (hypothetical protein cypCar\_00030121, partial )
- Gau. A05G0015880 (PREDICTED: ATP-binding cassette sub-family A member 2 isoform X2 )
- Gau. A05G0015890 (PREDICTED: protein PAXX-like isoform X1 )
- Gau. A05G0015900 (PREDICTED: diphthine methyltransferase-like )
- Gau. A05G0015910 (PREDICTED: 39S ribosomal protein L41, mitochondrial-like isoform X1 )
- Gau. A05G0015920 (PREDICTED: patatin-like phospholipase domain-containing protein 7 )
- Gau. A05G0015930 (PREDICTED: EMI domain-containing protein 1-like isoform X1 )
- Gau. A05G0015940 (PREDICTED: EMI domain-containing protein 1-like )
- Gau. A05G0015950 (PREDICTED: EMI domain-containing protein 1-like isoform X1 )
- Gau. A05G0015960 (PREDICTED: rhomboid domain-containing protein 3-like )
- Gau. A05G0015970 (PREDICTED: RNA-binding protein EWS-like )
- Gau. A05G0015980 (PREDICTED: GAS2-like protein 1 )
- Gau. A05G0015990 (PREDICTED: GAS2-like protein 1 )
- Gau. A05G0016000 (PREDICTED: AP-1 complex subunit beta-1 )
- Gau. A05G0016010 (hypothetical protein cypCar\_00010785 )
- Gau. A05G0016020 (PREDICTED: oxysterol-binding protein 2-like )
- Gau. A05G0016030 (PREDICTED: oxysterol-binding protein 2-like )

- Gau. A05G0016040 (PREDICTED: oxysterol-binding protein 2-like isoform X2 [Sinocyclocheilus rhinoceros]) **nr**  
(PREDICTED: Danio rerio si:ch211-106a19.1 (si:ch211-106a19.1), transcript variant X3, mRNA) **nt**
- Gau. A05G0016050 (hypothetical protein cypCar\_00010783 [Cyprinus carpio] Danio rerio ATPase, H<sup>+</sup> transporting, lysosomal V0 subunit a2b (atp6v0a2b), mRNA >gi|190338429|gb|BC163506.1|) **nr**  
(Danio rerio si:ch211-106a19.2, mRNA (cDNA clone MGC:195026 IMAGE:9038598), complete cds) **nt**
- Gau. A05G0016060 (PREDICTED: V-type proton ATPase 116 kDa subunit a-like [Sinocyclocheilus grahami]) **nr**  
(Cyprinus carpio genome assembly common carp genome , scaffold LG10) **nt**
- Gau. A05G0016070 (PREDICTED: tRNA (uracil-5-)-methyltransferase homolog A [Sinocyclocheilus rhinoceros] Danio rerio trm2 tRNA methyltransferase 2 homolog A (S. cerevisiae) (trmt2a), mRNA >gi|28279547|gb|BC045367.1| ) **nr**  
(Danio rerio trm2 tRNA methyltransferase 2 homolog A (S. cerevisiae), mRNA (cDNA clone MGC:55519 IMAGE:2641919), complete cds ) **nt**
- Gau. A05G0016080 (PREDICTED: LOW QUALITY PROTEIN: microprocessor complex subunit DGCR8-like [Cyprinus carpio]) **nr**  
(Danio rerio DGCR8 microprocessor complex subunit (dgcr8), mRNA) **nt**

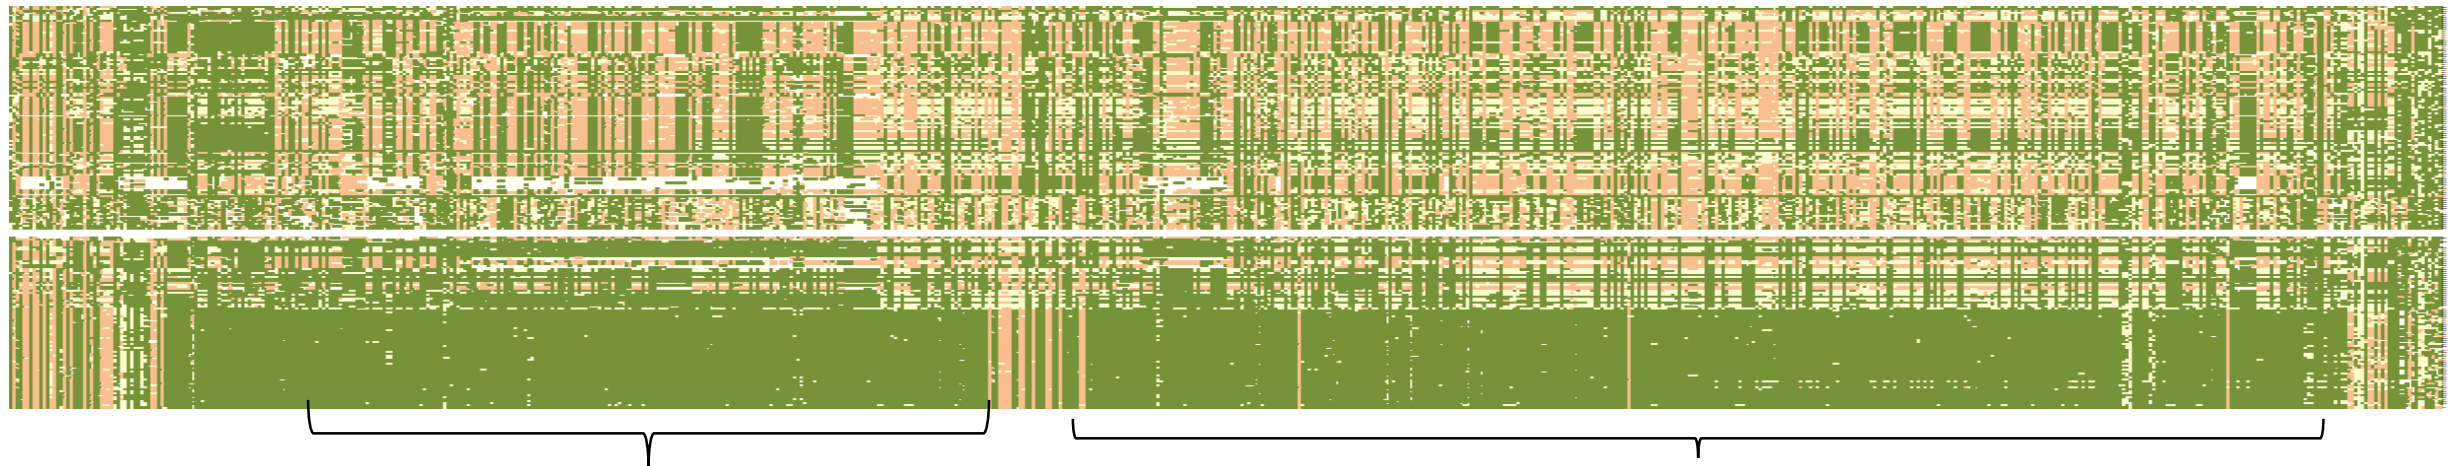

25966280—26049000

Cau. A08G0012150 (ATP-dependent RNA helicase DDX51 )

Cau. A08G0012160 (PREDICTED: AP2-associated protein kinase 1-like isoform X2 )

26066280—26210000

Cau. A08G0012180 (PREDICTED: protein RER1 isoform X2 )

Cau. A08G0012190 (PREDICTED: protein RER1-like isoform X2 )

Cau. A08G0012200 (PREDICTED: tumor protein p73-like )

Cau. A08G0012210 (p73 )



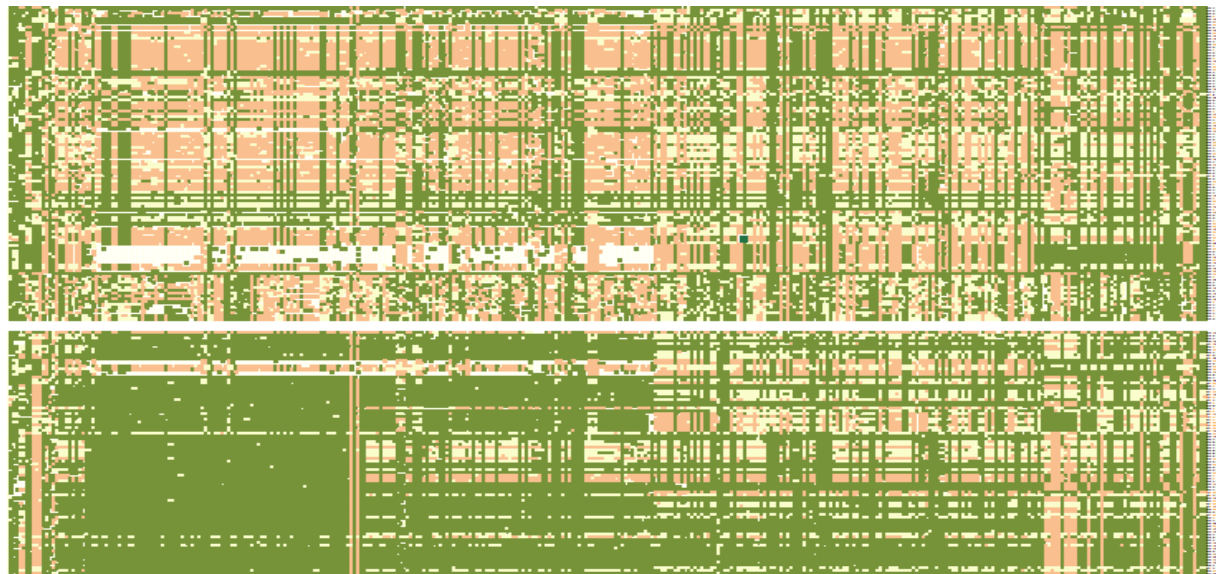

26297000—26380000

- Gau.A08G0012320 (PREDICTED: tolloid-like protein 1 [Sinocyclocheilus grahami]) nr  
(Cyprinus carpio genome assembly common carp genome ,scaffold LG15) nt
- Gau.A08G0012330 (PREDICTED: bone morphogenetic protein 1-like [Cyprinus carpio]) nr  
(Danio rerio bone morphogenetic protein 1a (bmp1a), mRNA >gi|89191815|dbj|AB239771.1| Danio rerio bmp1a mRNA for bone morphogenetic protein 1a, complete cds) nt
- Gau.A08G0012340 (bone morphogenetic protein 1 isoform X1 [Danio rerio]) nr  
(Danio rerio bone morphogenetic protein 1a, mRNA (cDNA clone MGC:195055 IMAGE:9038552), complete cds) nt
- Gau.A08G0012350
- Gau.A08G0012360 (PREDICTED: protein dispatched homolog 3-like [Sinocyclocheilus anshuiensis]) nr  
(Cyprinus carpio genome assembly common carp genome ,scaffold LG1) nt
- Gau.A08G0012370 (PREDICTED: tolloid-like protein 1 [Sinocyclocheilus grahami]) nr  
(Cyprinus carpio genome assembly common carp genome ,scaffold LG15) nt



Cau. A09G0004970 PREDICTED: C-X-C chemokine receptor type 4-B-like [Cyprinus carpio]  
Cau. A09G0004980 PREDICTED: thrombospondin type-1 domain-containing protein 7B-like [Sinocyclocheilus anshuiensis]  
Cau. A09G0004990 PREDICTED: thrombospondin type-1 domain-containing protein 7B-like [Sinocyclocheilus rhinoceros]  
Cau. A09G0005000 PREDICTED: thrombospondin type-1 domain-containing protein 7B [Sinocyclocheilus grahami]



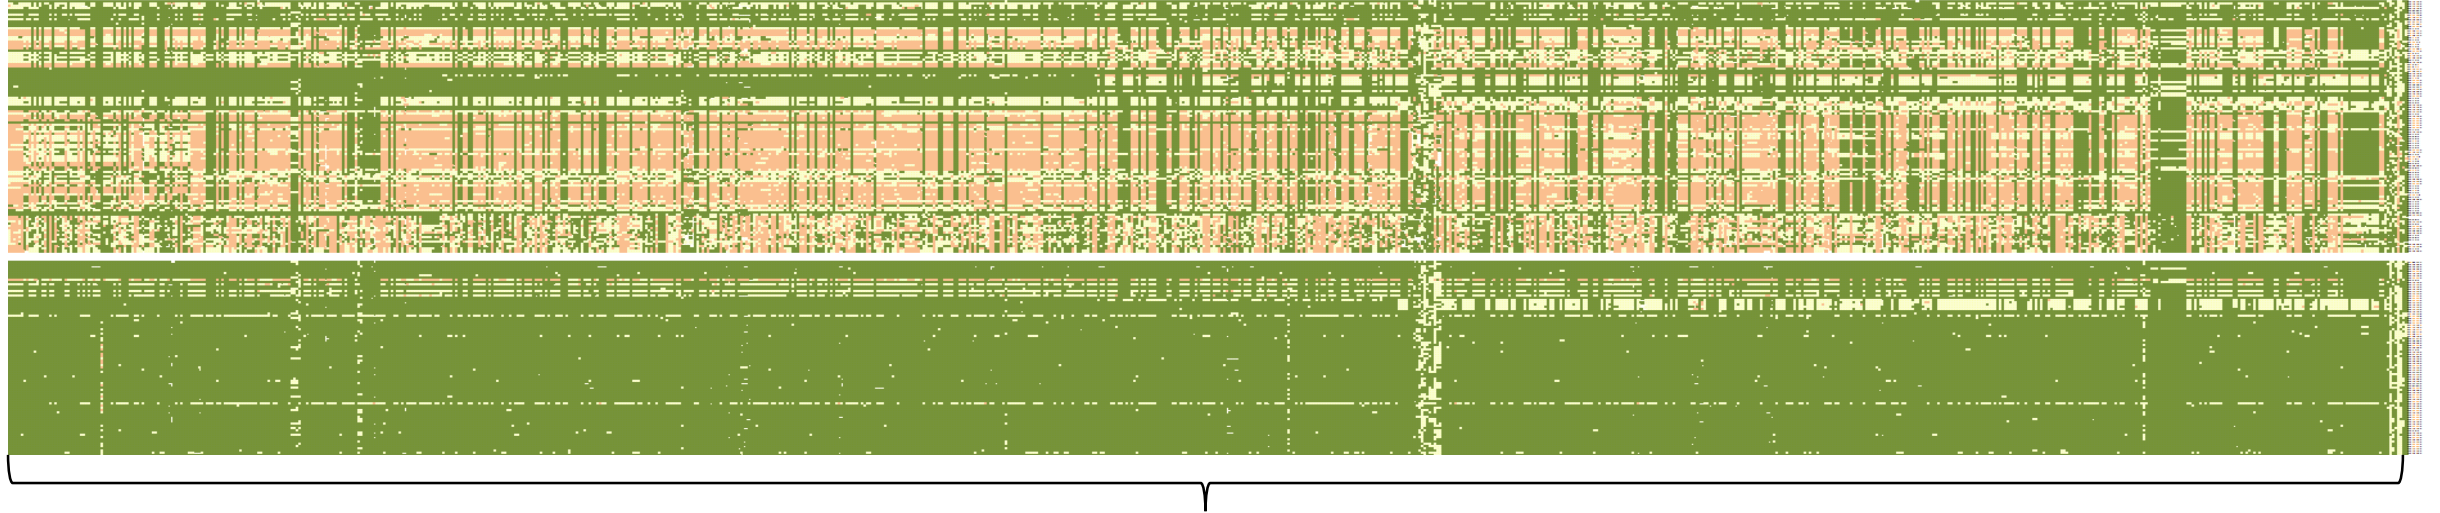

18155915-18389219

Cau. A09G0007150 (PREDICTED: diacylglycerol kinase beta-like isoform X1 ) **nr**

(PREDICTED: Danio rerio diacylglycerol kinase beta-like (LOC567728), transcript variant X5, mRNA ) **nt**

Cau. A09G0007160 (PREDICTED: gamma-crystallin B-like )

Cau. A09G0007170 (hypothetical protein Z043\_108786 )

Cau. A09G0007180 (hypothetical protein cypCar\_00047851 )

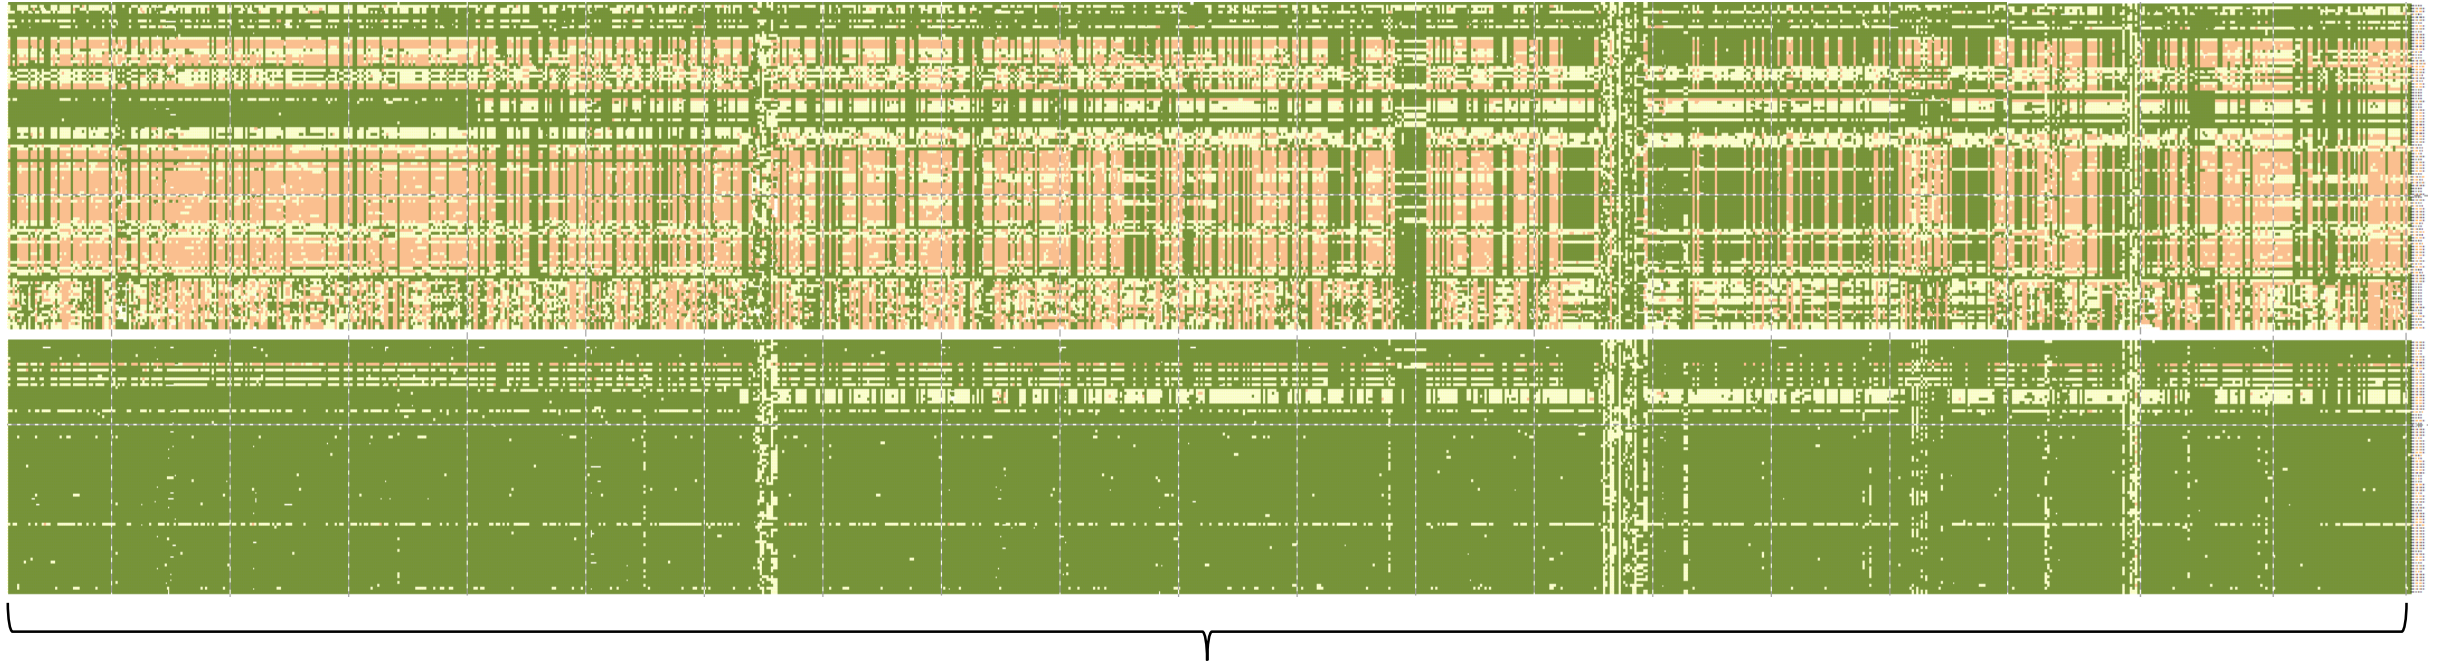

18203447-18479213

- Gau. A09G0007150 (PREDICTED: diacylglycerol kinase beta-like isoform X1 ) **nr**
  - (PREDICTED: Danio rerio diacylglycerol kinase beta-like (LOC567728), transcript variant X5, mRNA ) **nt**
- Gau. A09G0007160 (PREDICTED: gamma-crystallin B-like )
- Gau. A09G0007170 (hypothetical protein Z043\_108786 )
- Gau. A09G0007180 (hypothetical protein cypCar\_00047851 )



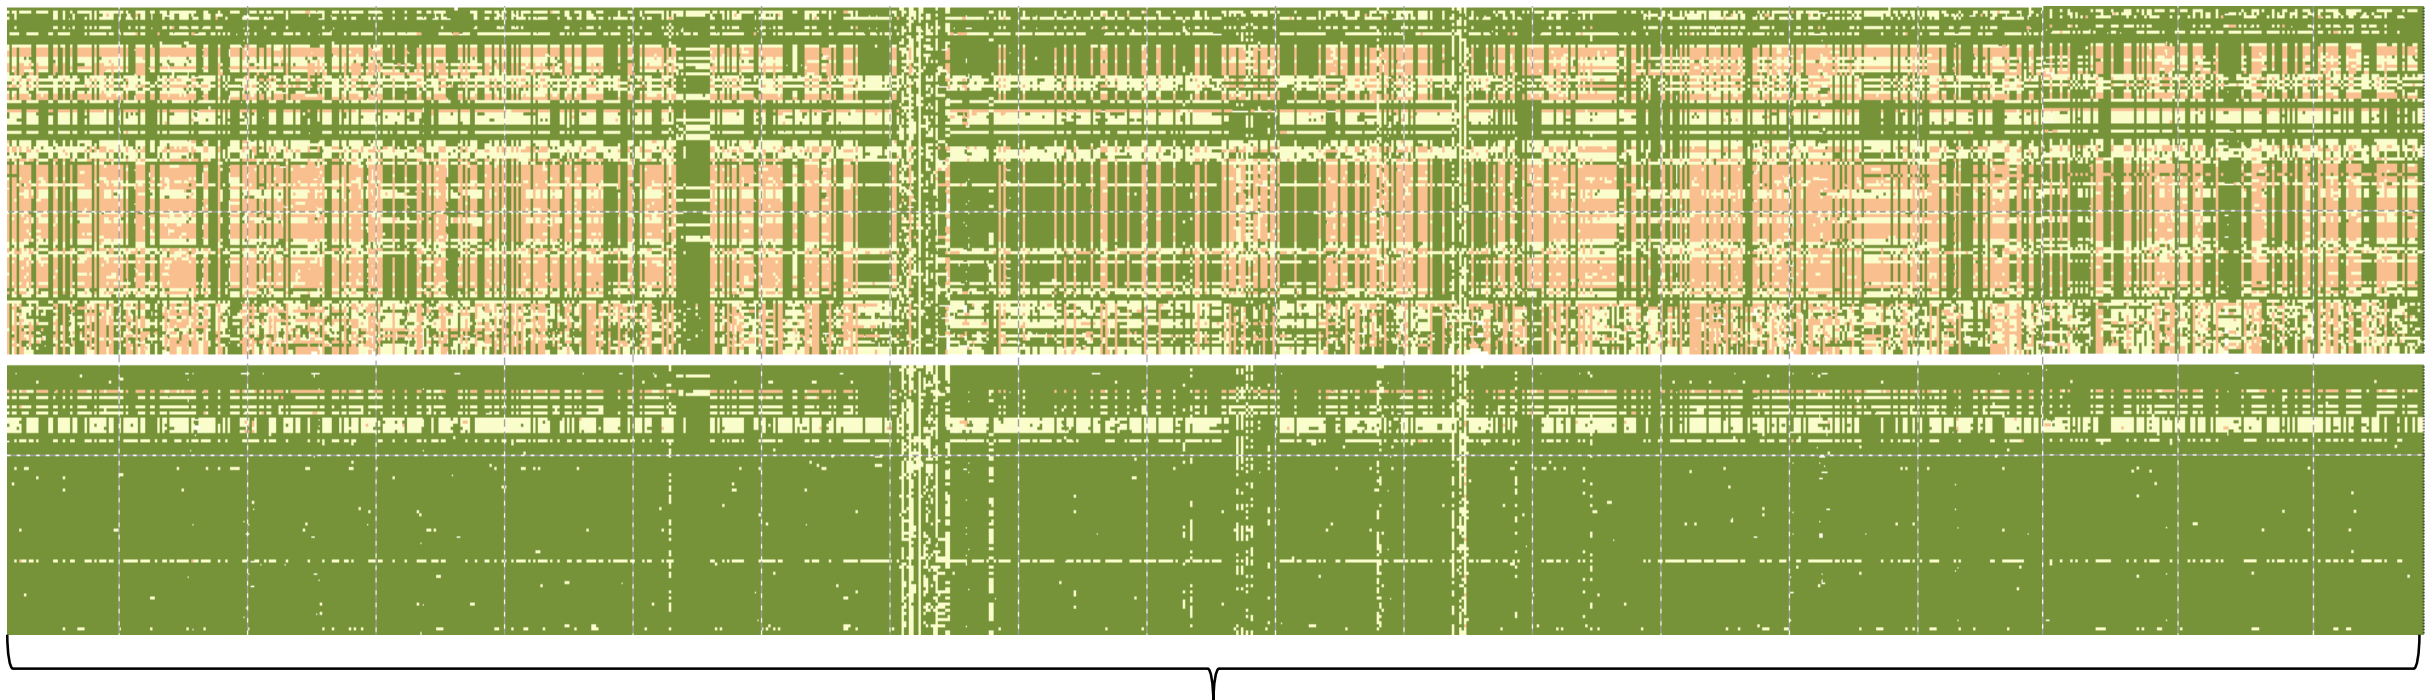

18291396-18388000

- Cau. A09G0007160 (PREDICTED: gamma-crystallin B-like )
- Cau. A09G0007170 (hypothetical protein Z043\_108786 )
- Cau. A09G0007180 (hypothetical protein cypCar\_00047851 )

18396000-18552000

- Cau. A09G0007190 (hypothetical protein cypCar\_00033088 [Cyprinus carpio]) **nr**  
(Carp mRNA for gamma-crystallin (gamma-m2)) **nt**
- Cau. A09G0007200 (hypothetical protein cypCar\_00049937 )
- Cau. A09G0007210 (hypothetical protein Z043\_108786 )
- Cau. A09G0007220 (hypothetical protein cypCar\_00019370 )
- Cau. A09G0007230 (PREDICTED: uncharacterized protein C2orf80-like )
- Cau. A09G0007240 (PREDICTED: shugoshin-like 2 isoform X1 )
- Cau. A09G0007250 (PREDICTED: ubiquitin carboxyl-terminal hydrolase isozyme L3-like )
- Cau. A09G0007260 (PREDICTED: LIM domain only protein 7-like isoform X6 )

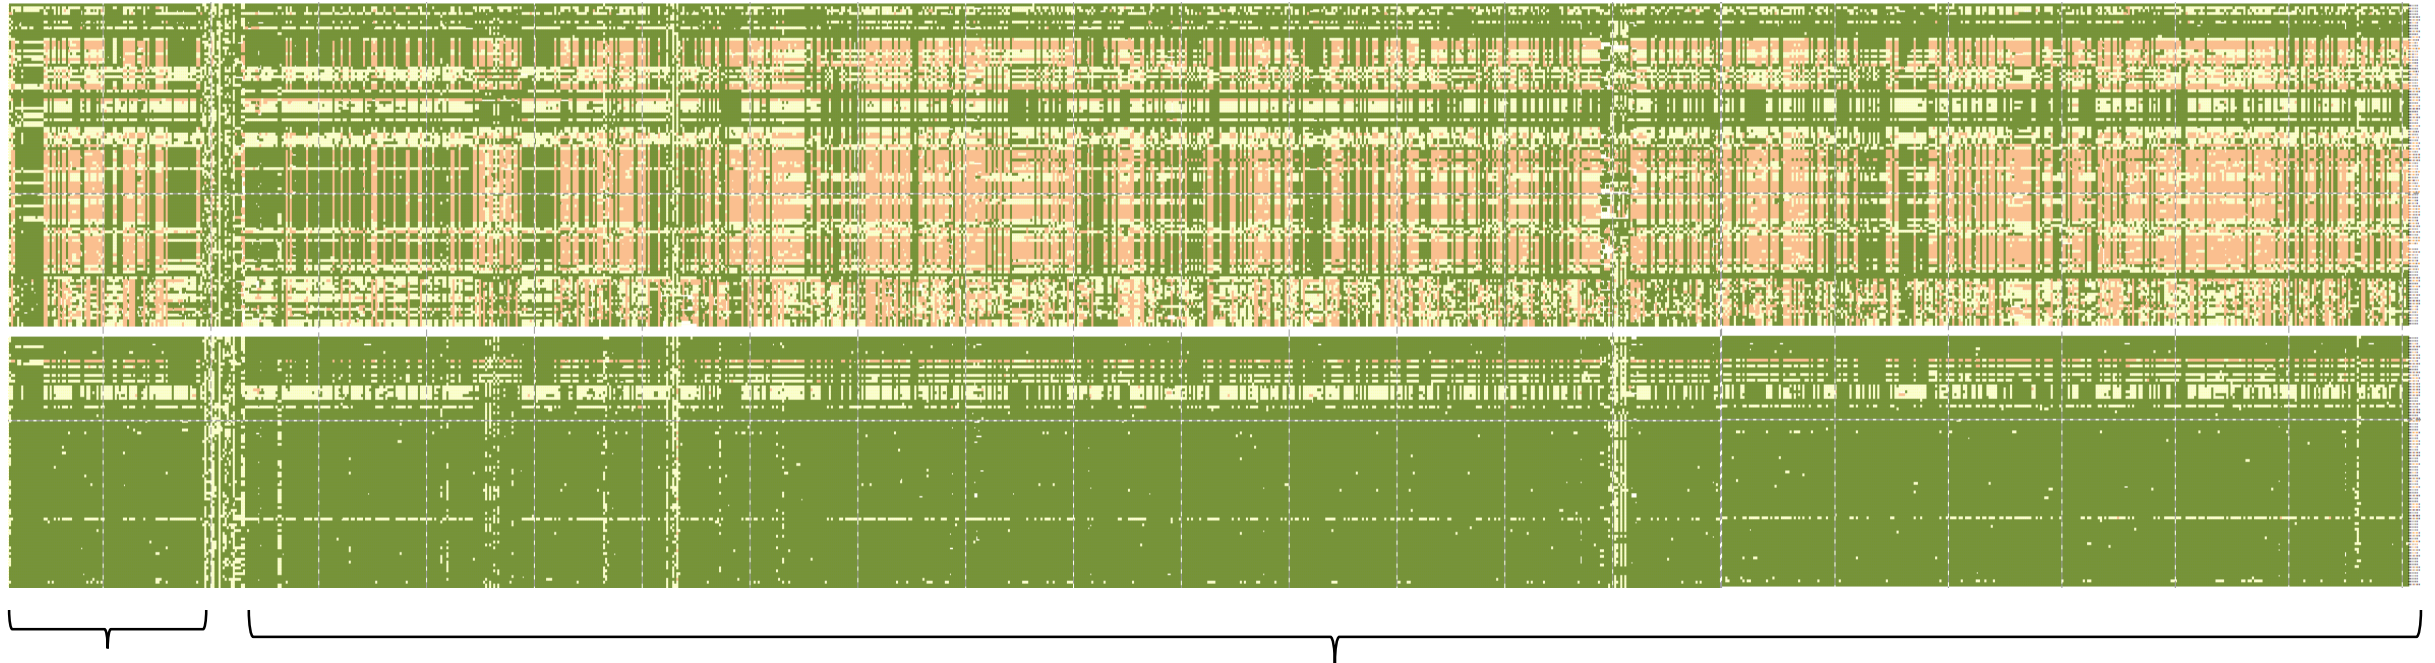

18352900-1837500  
non-coding

- 18385000-18639200
- Cau. A09G0007190 (hypothetical protein cypCar\_00033088 [Cyprinus carpio]) **nr**  
(Carp mRNA for gamma-crystallin (gamma-m2)) **nt**
  - Cau. A09G0007200 (hypothetical protein cypCar\_00049937 )
  - Cau. A09G0007210 (hypothetical protein Z043\_108786 )
  - Cau. A09G0007220 (hypothetical protein cypCar\_00019370 )
  - Cau. A09G0007230 (PREDICTED: uncharacterized protein C2orf80-like )
  - Cau. A09G0007240 (PREDICTED: shugoshin-like 2 isoform X1 )
  - Cau. A09G0007250 (PREDICTED: ubiquitin carboxyl-terminal hydrolase isozyme L3-like )
  - Cau. A09G0007260 (PREDICTED: LIM domain only protein 7-like isoform X6 )



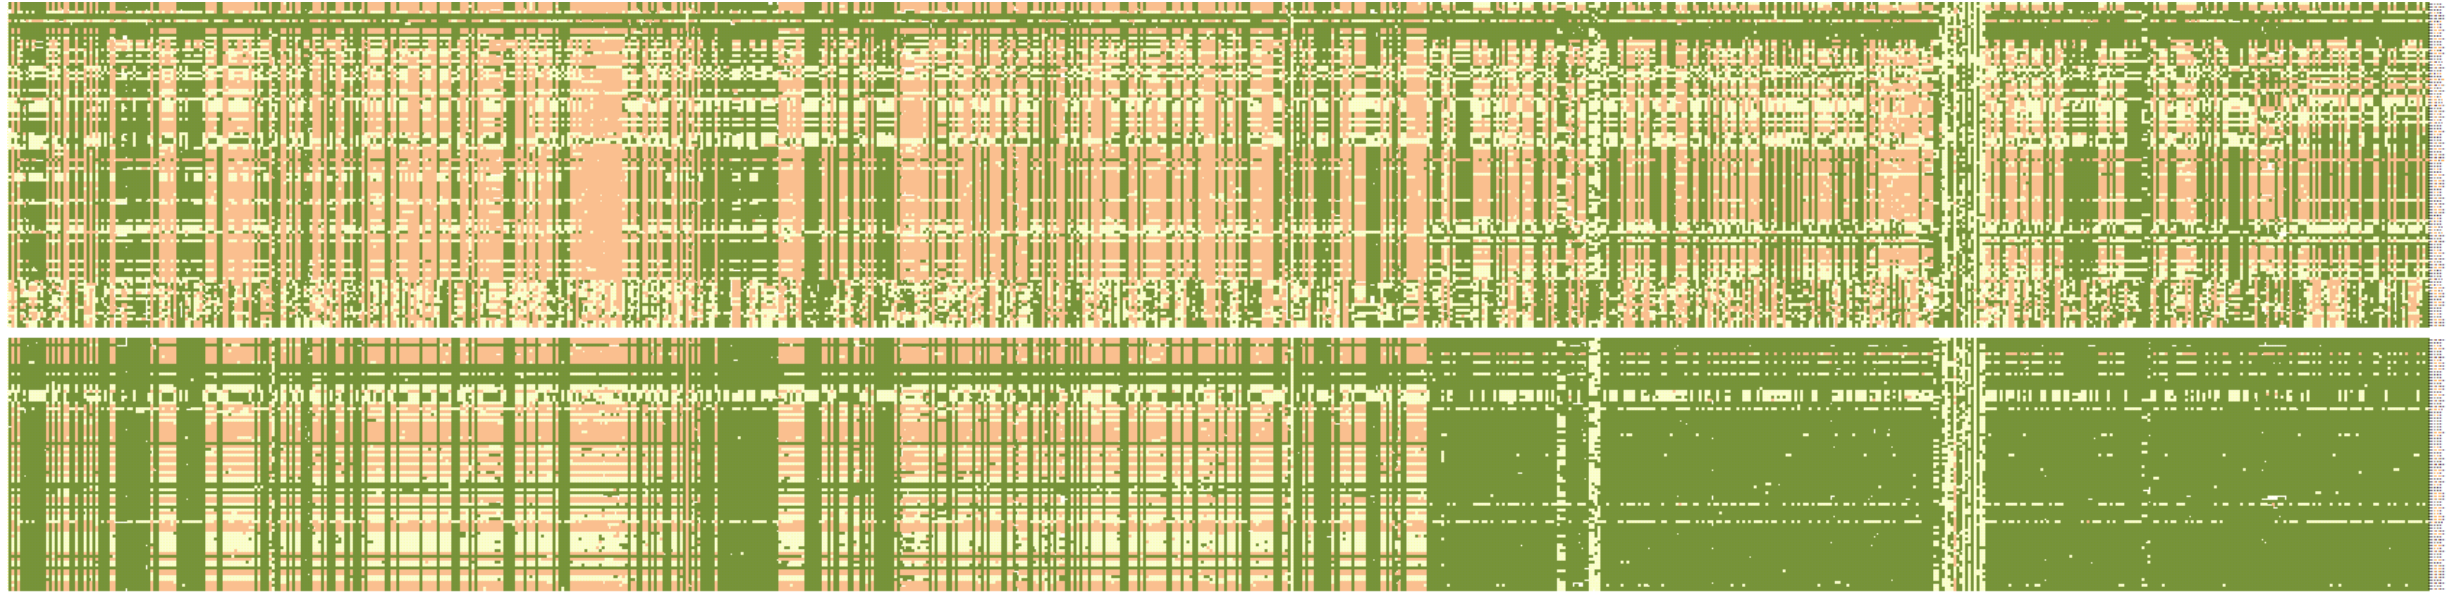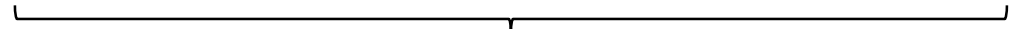

19387000-19490460

- Cau. A09G0007830 (hypothetical protein cypCar\_00040608 )
- Cau. A09G0007840 (hypothetical protein cypCar\_00040608 )
- Cau. A09G0007850 (PREDICTED: Krueppel-like factor 12 isoform X2 )
- Cau. A09G0007860 (PREDICTED: Krueppel-like factor 5 )
- Cau. A09G0007870 (hypothetical protein cypCar\_00024402, partial )

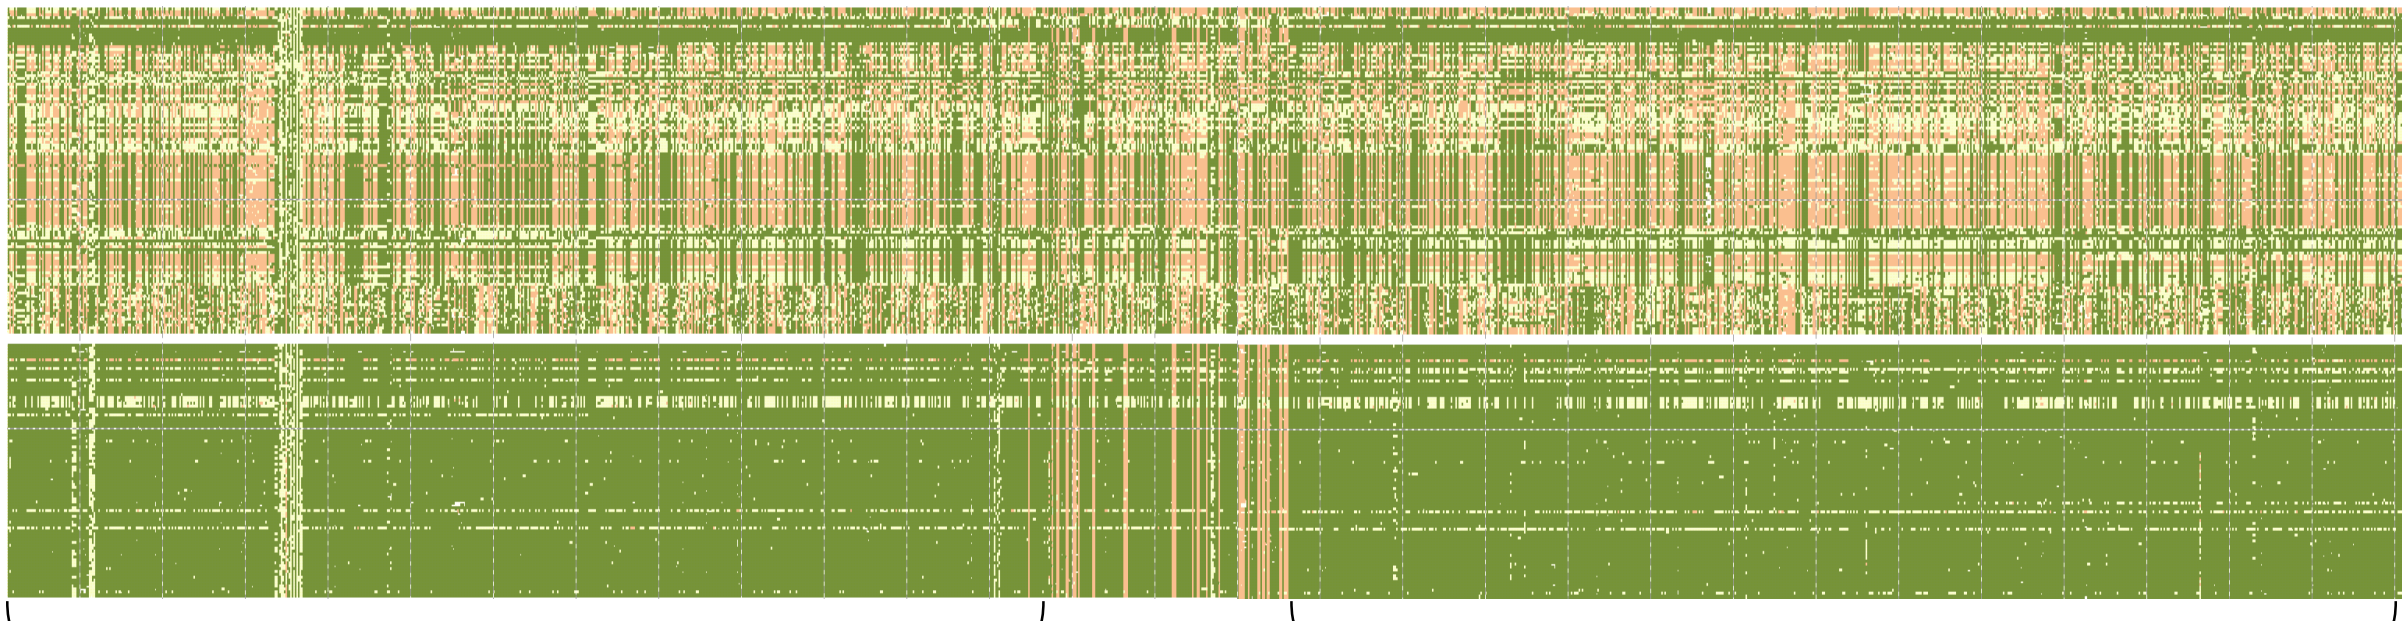

19345597-19539500

19579000-19788588

- |                                                                                            |    |                                                                                       |
|--------------------------------------------------------------------------------------------|----|---------------------------------------------------------------------------------------|
| Cau. A09G0007790 (Cyprinus carpio genome assembly common carp genome , scaffold 000029040) | nt | Cau. A09G0007890 (PREDICTED: dachshund homolog 1-like )                               |
| Cau. A09G0007800 (Cyprinus carpio genome assembly common carp genome , scaffold 000029040) | nt | Cau. A09G0007900 (PREDICTED: dachshund homolog 1-like )                               |
| Cau. A09G0007810 (Cyprinus carpio genome assembly common carp genome , scaffold 000029040) | nt | Cau. A09G0007910 (PREDICTED: dachshund homolog 1-like isoform X4 )                    |
| Cau. A09G0007820 (Cyprinus carpio genome assembly common carp genome , scaffold 000014941) | nt | Cau. A09G0007920 (PREDICTED: N-arachidonyl glycine receptor-like )                    |
| Cau. A09G0007830 (hypothetical protein cypCar_00040608 )                                   |    | Cau. A09G0007930 (PREDICTED: G-protein coupled receptor 183-A )                       |
| Cau. A09G0007840 (hypothetical protein cypCar_00040608 )                                   |    | Cau. A09G0007940 (hypothetical protein cypCar_00026185 )                              |
| Cau. A09G0007850 (PREDICTED: Krueppel-like factor 12 isoform X2 )                          |    | Cau. A09G0007950 (uncharacterized protein LOC111978612 )                              |
| Cau. A09G0007860 (PREDICTED: Krueppel-like factor 5 )                                      |    | Cau. A09G0007960 (PREDICTED: G-protein coupled receptor 183-like )                    |
| Cau. A09G0007870 (hypothetical protein cypCar_00024402, partial )                          |    | Cau. A09G0007970 (PREDICTED: uncharacterized protein LOC109047471 )                   |
| Cau. A09G0007880 (hypothetical protein cypCar_00024401 )                                   |    | Cau. A09G0007980 (PREDICTED: citrate lyase subunit beta-like protein, mitochondrial ) |
|                                                                                            |    | Cau. A09G0007990 (citrate lyase subunit beta-like protein, mitochondrial isoform X1 ) |



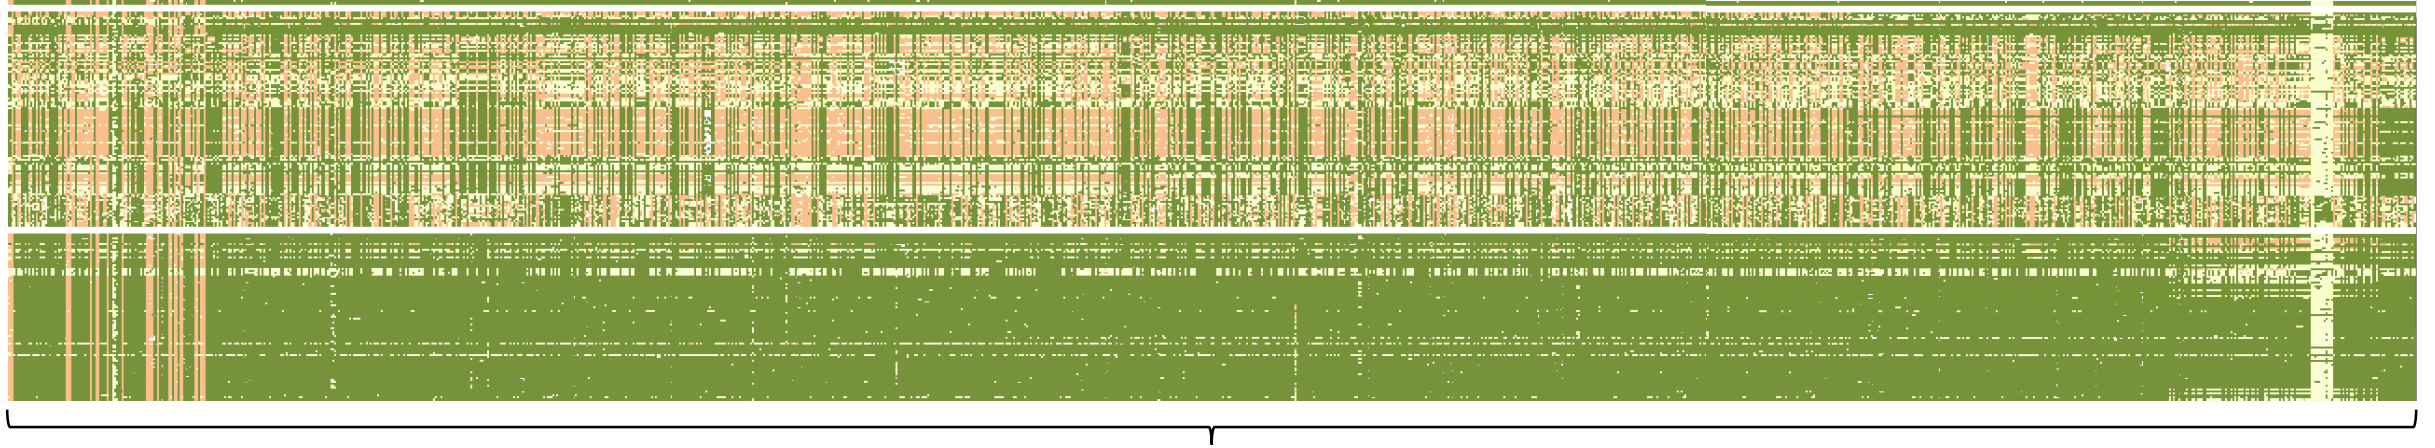

19591173-19901780

- Gau. A09G0007900 (PREDICTED: dachshund homolog 1-like )
- Gau. A09G0007910 (REDICTED: dachshund homolog 1-like isoform X4 )
- Gau. A09G0007920 (PREDICTED: N-arachidonyl glycine receptor-like )
- Gau. A09G0007930 (PREDICTED: G-protein coupled receptor 183-A )
- Gau. A09G0007940 (hypothetical protein cypCar\_00026185 )
- Gau. A09G0007950 (uncharacterized protein LOC111978612 )
- Gau. A09G0007960 (PREDICTED: G-protein coupled receptor 183-like )
- Gau. A09G0007970 (PREDICTED: uncharacterized protein LOC109047471 )
- Gau. A09G0007980 (PREDICTED: citrate lyase subunit beta-like protein, mitochondrial )
- Gau. A09G0007990 (citrate lyase subunit beta-like protein, mitochondrial isoform X1 )
- Gau. A09G0008000 (uncharacterized protein LOC111947400 isoform X1 )
- Gau. A09G0008010 (Cyprinus carpio genome assembly common carp genome , scaffold LG20 ) nt
- Gau. A09G0008020 (PREDICTED: zinc finger protein ZIC 5-like isoform X1 )
- Gau. A09G0008030 (PREDICTED: zinc finger protein ZIC 2-like )
- Gau. A09G0008040 (Cyprinus carpio genome assembly common carp genome , scaffold 000010066 ) nt
- Gau. A09G0008050 (PREDICTED: propionyl-CoA carboxylase alpha chain, mitochondrial-like, partial )
- Gau. A09G0008060 (Cyprinus carpio genome assembly common carp genome , scaffold 000028950 ) nt

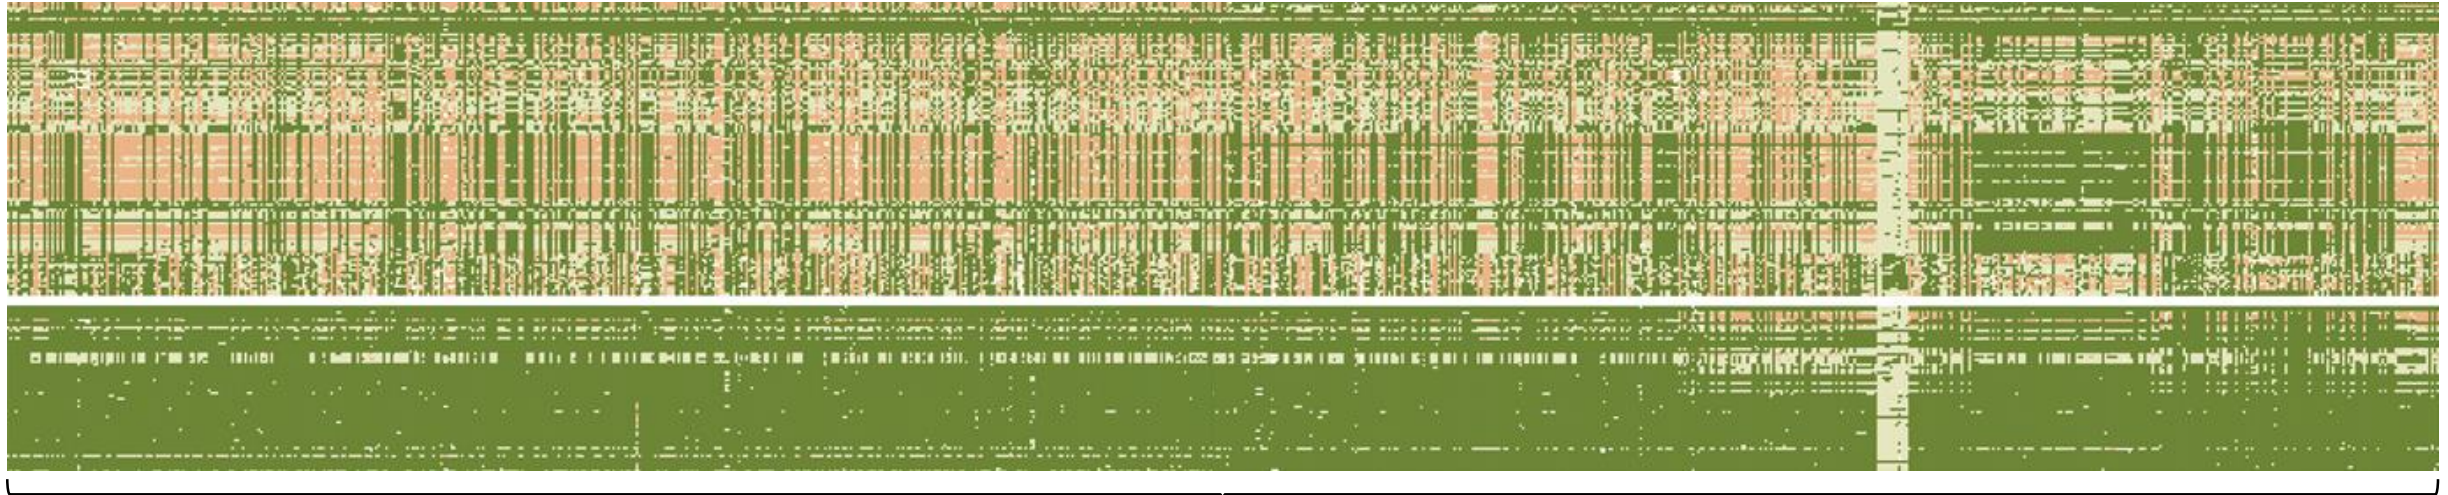

19707566-19907129

- Cau. A09G0007980 (PREDICTED: citrate lyase subunit beta-like protein, mitochondrial )
- Cau. A09G0007990 (citrate lyase subunit beta-like protein, mitochondrial isoform X1 )
- Cau. A09G0008000 (uncharacterized protein LOC111947400 isoform X1 )
- Cau. A09G0008010 (Cyprinus carpio genome assembly common carp genome , scaffold LG20 )nt
- Cau. A09G0008020 (PREDICTED: zinc finger protein ZIC 5-like isoform X1 )
- Cau. A09G0008030 (PREDICTED: zinc finger protein ZIC 2-like )
- Cau. A09G0008040 (Cyprinus carpio genome assembly common carp genome , scaffold 000010066 ) nt
- Cau. A09G0008050 (PREDICTED: propionyl-CoA carboxylase alpha chain, mitochondrial-like, partial )
- Cau. A09G0008060 (Cyprinus carpio genome assembly common carp genome , scaffold 000028950 )nt
- Cau. A09G0008070 (Cyprinus carpio genome assembly common carp genome , scaffold LG18) nt
- Cau. A09G0008080 (Cyprinus carpio genome assembly common carp genome , scaffold 000028950) nt
- Cau. A09G0008090 (PREDICTED: transmembrane and TPR repeat-containing protein 4-like [Sinocyclocheilus rhinoceros]) nr



Chr13\_3A30007955-30302537-01

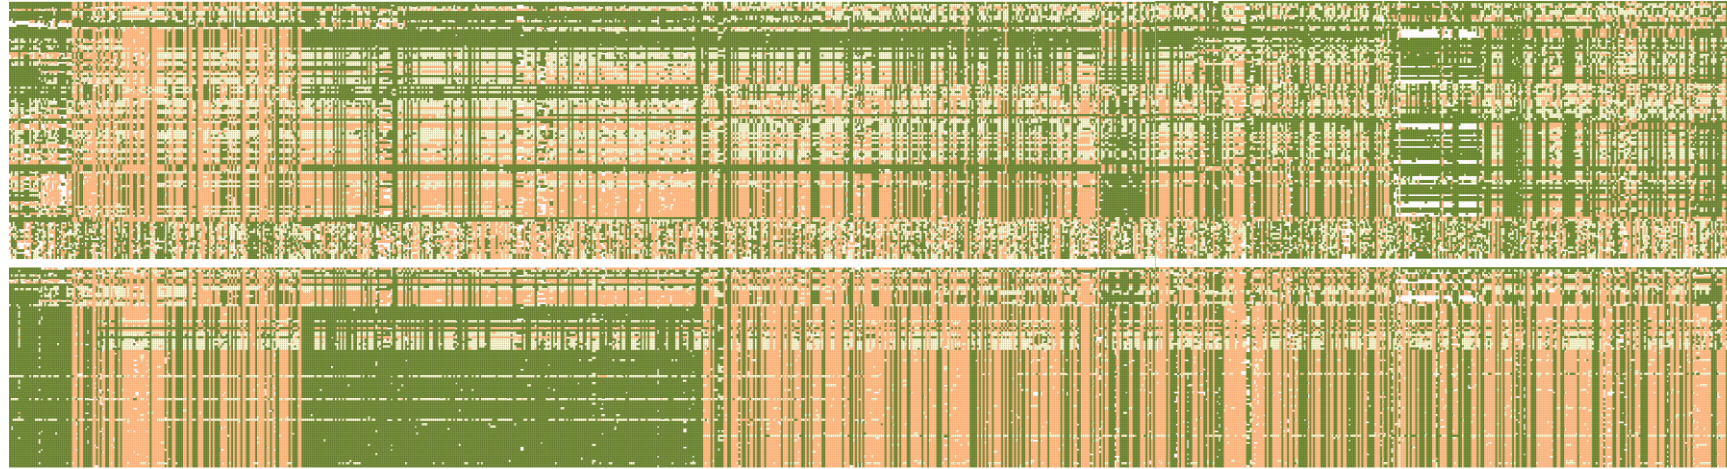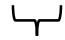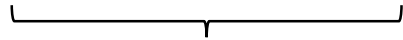

30007955-30228591  
non-coding

30066871-30124560  
non-coding

Chr16\_3A11788392-12049531-1

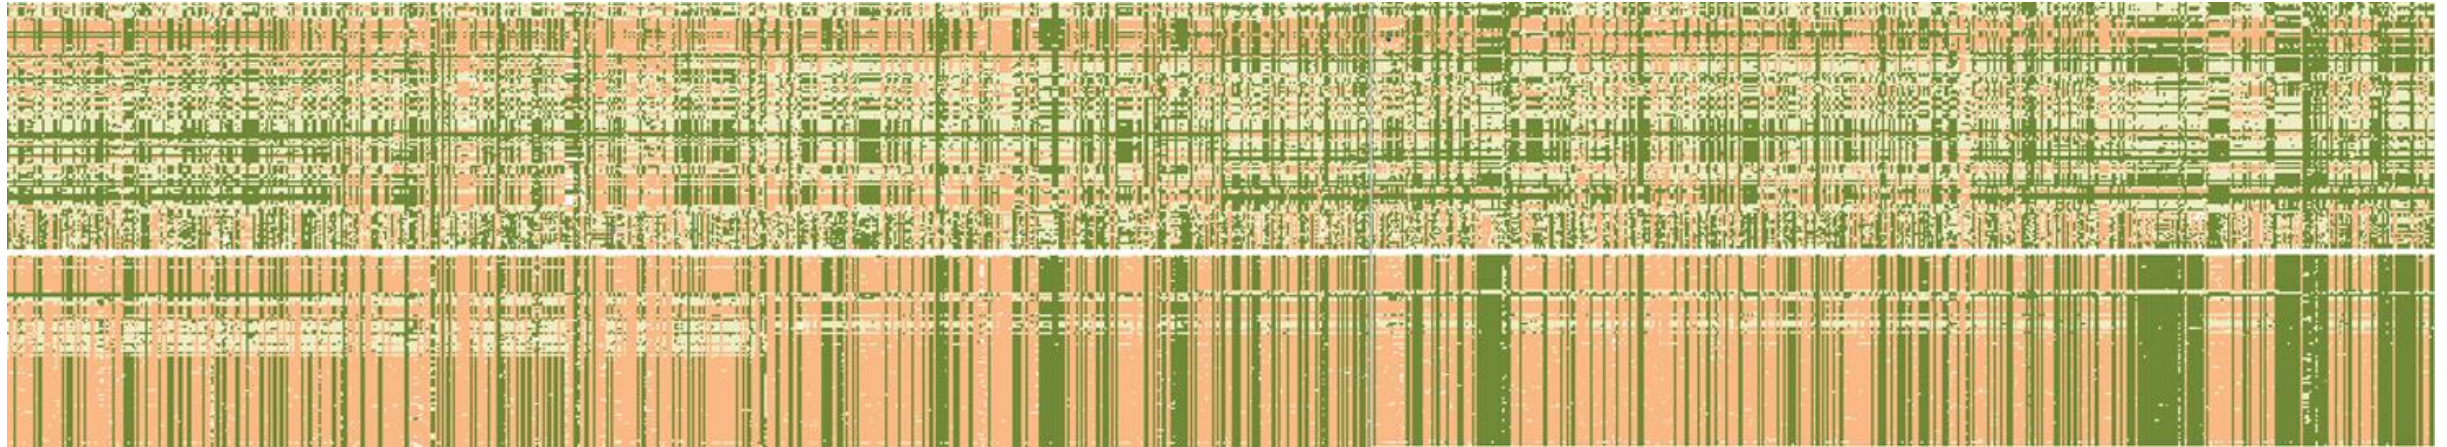

11942943-12008227

Cau. A16G0002920 (PREDICTED: T-cell activation inhibitor, mitochondrial-like [Cyprinus carpio] **nr**  
(PREDICTED: Danio rerio T cell activation inhibitor, mitochondrial (tcaim), mRNA) **nt**)

Cau. A16G0002940 (Zinc finger BED domain-containing protein 4 )

Cau. A16G0002950 (PREDICTED: E3 ubiquitin-protein ligase TRIM71-like )

Cau. A16G0002960 (PREDICTED: CCR4-NOT transcription complex subunit 10 isoform X3 )

12017754-12025950

non-coding



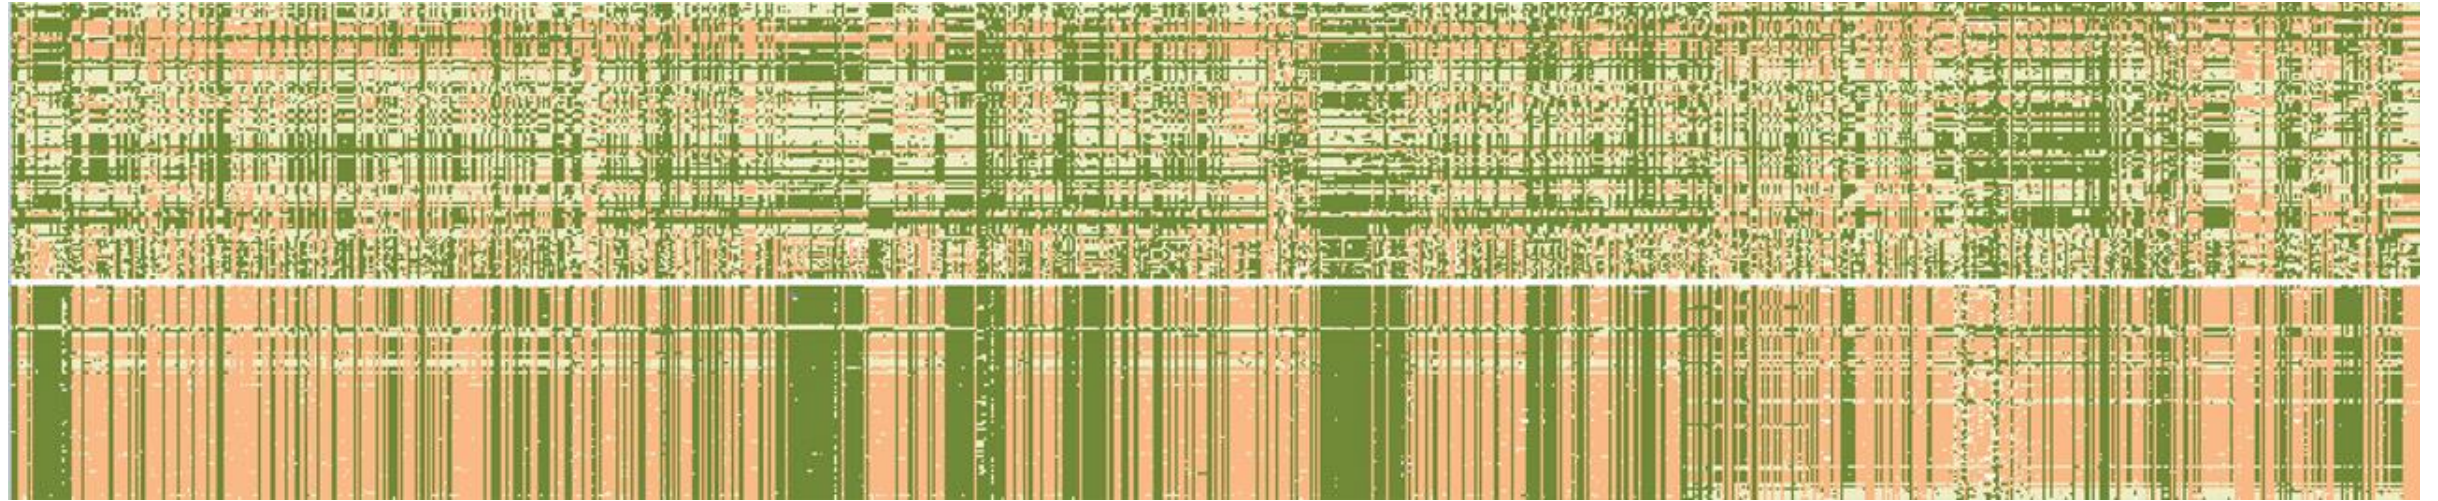

└──┘

└──┘

12041191-13283969

13841191-14336007

non-coding

**Cau. A16G0002970** (RecName: Full=Cholecystokinin; AltName: Full=CCK8; Contains: RecName: Full=Cholecystokinin-8; Short=CCK8; Contains: RecName: Full=Cholecystokinin-12; Short=CCK12; Contains: RecName: Full=Cholecystokinin-26; Short=CCK26; Contains: RecName: Full=Cholecystokinin-36; Short=CCK36; Contains: RecName: Full=Cholecystokinin-69; Short=CCK69; Flags: Precursor) **nr**  
(*Carassius gibelio* cholecystokinin mRNA, complete cds) **nt**

**Cau. A16G0002980** (PREDICTED: trafficking kinesin-binding protein 1-like [*Cyprinus carpio*]) **nr**  
(*Cyprinus carpio* genome assembly common carp genome , scaffold 000002388) **nt**



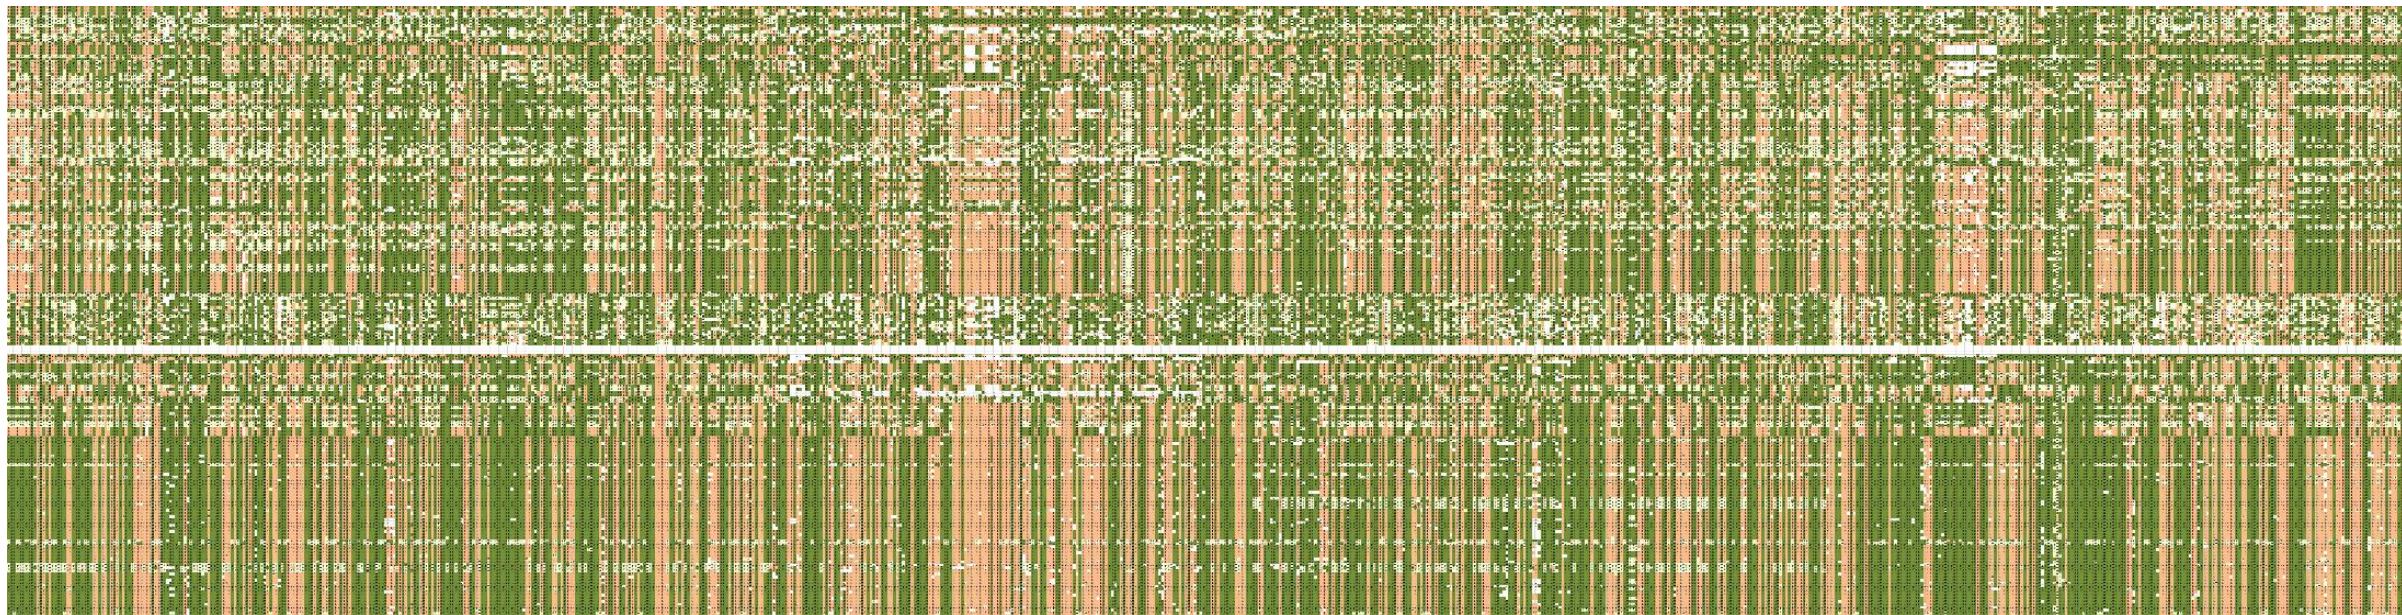

2745745-275735869

Gau. A22G0009870 (SCL-beta )

Gau. A22G0009880 (Cyprinus carpio genome assembly common carp genome , scaffold LG50) **nt**

Gau. A22G0009890 (PREDICTED: PDZK1-interacting protein 1-like )

Gau. A22G0009900 (PREDICTED: inaD-like protein )

Gau. A22G0009910 (hypothetical protein cypCar\_00028161, partial )

Gau. A22G0009920 (PREDICTED: inaD-like protein )

Gau. A22G0009930 (PREDICTED: uncharacterized protein LOC109109509 )



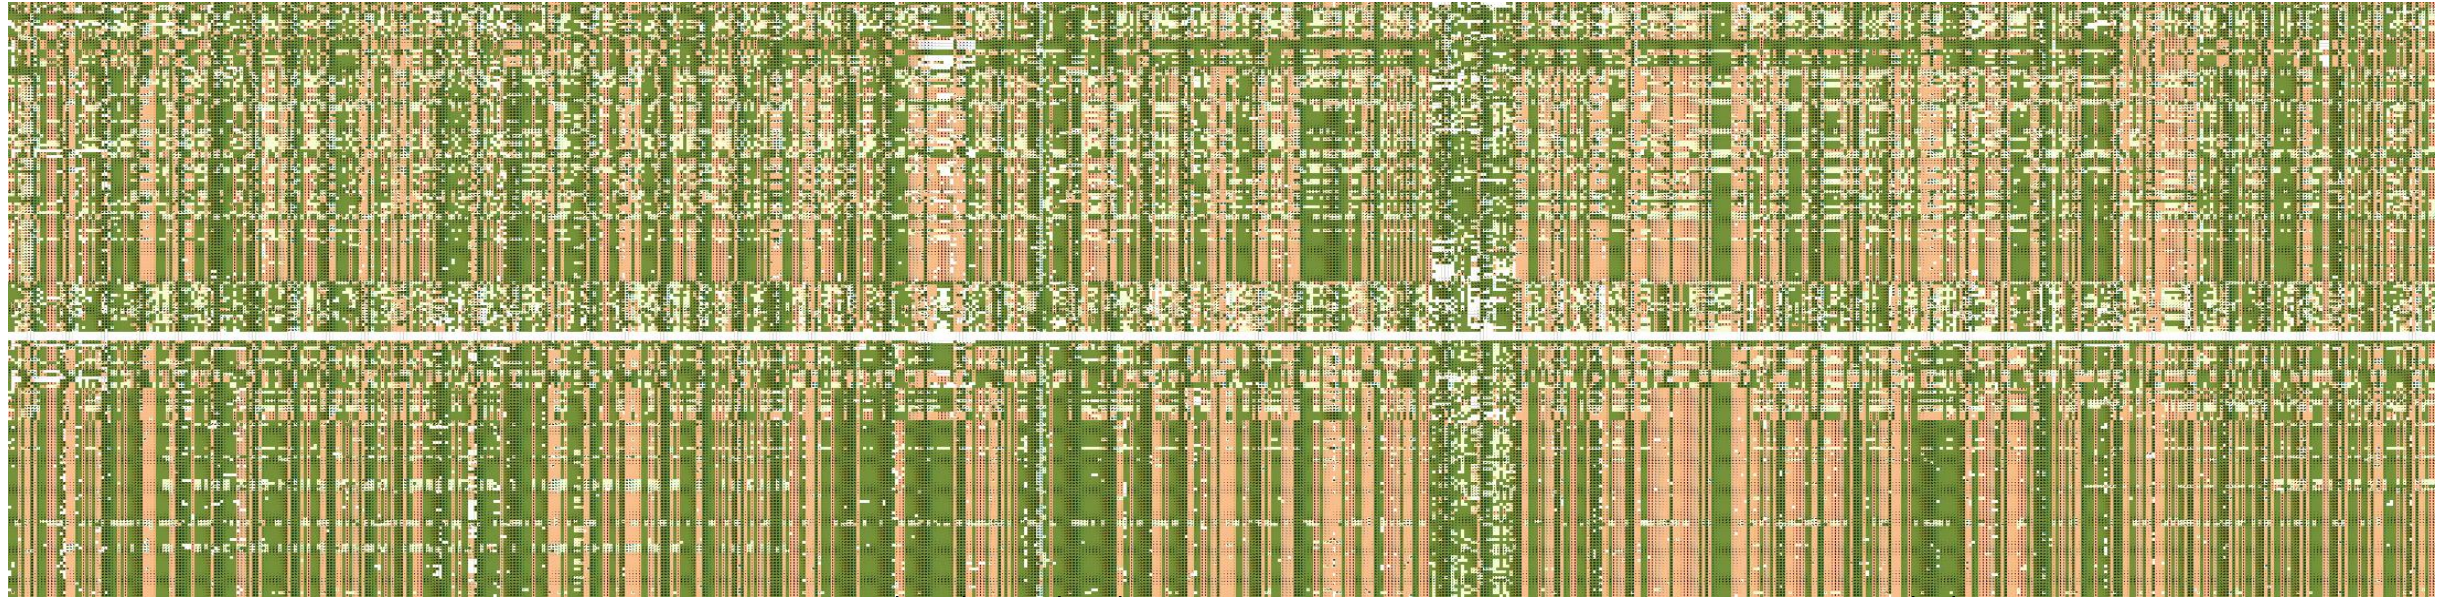

27470226-27482013  
non-coding

27504652-2532219

27603158-276152362  
Cau. A22G0009950 (PREDICTED: inaD-like protein )

Cau. A22G0009870 (SCL-beta )

Cau. A22G0009880 (Cyprinus carpio genome assembly common carp genome , scaffold LG50) **nt**

Cau. A22G0009890 (PREDICTED: PDZK1-interacting protein 1-like )

Cau. A22G0009900 (PREDICTED: inaD-like protein )

Cau. A22G0009910 (hypothetical protein cypCar\_00028161, partial )



Chr22\_3A27500863-27761097-1

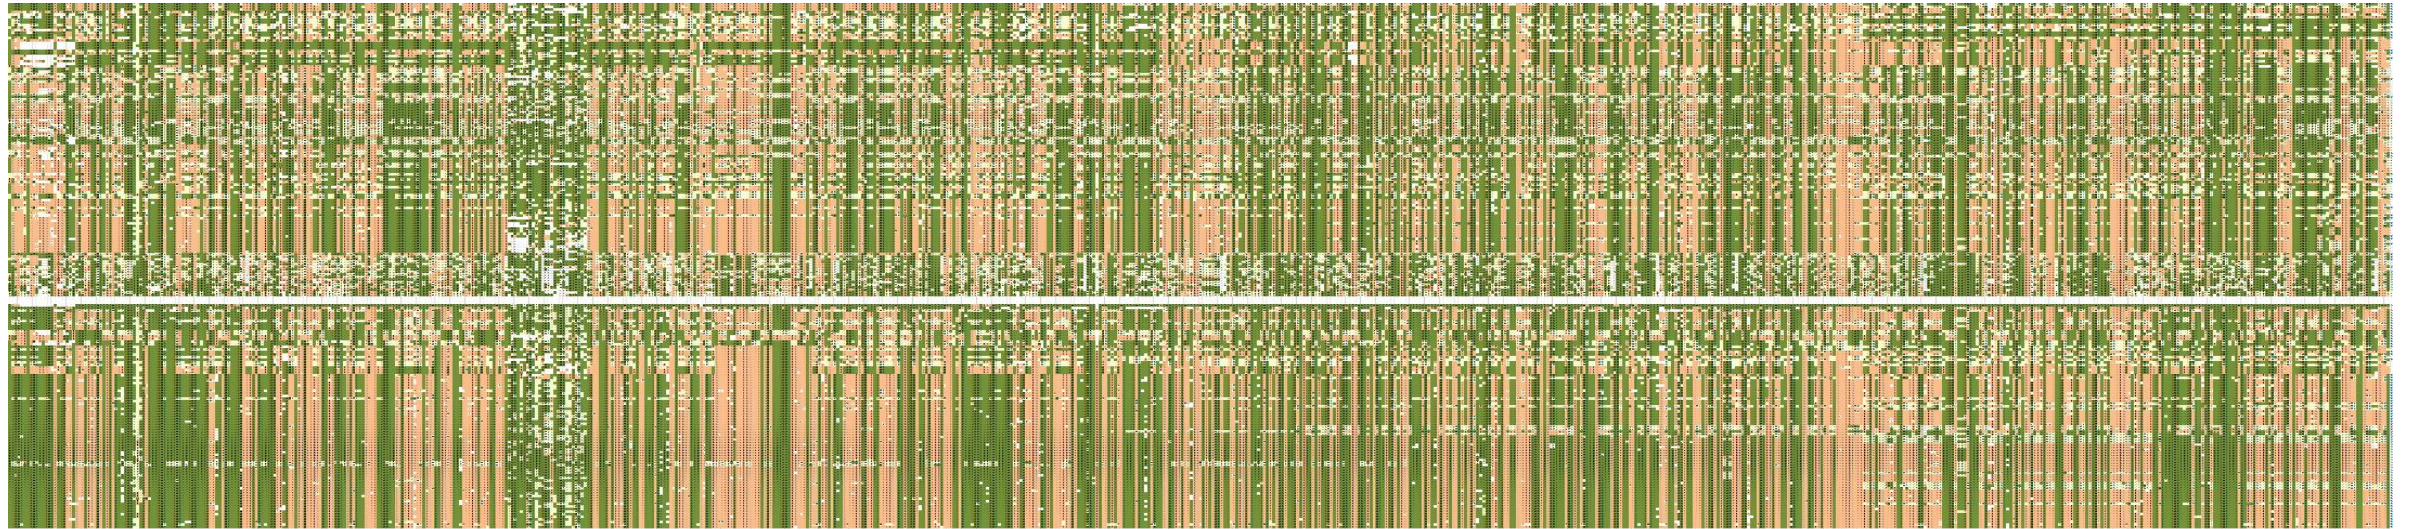

27603871-27609295  
non-coding

27733989-27739411  
Cau. A22G0011030 (unnamed protein product )

27500863-27506284  
Cau. A22G0009880 (Cyprinus carpio genome assembly common carp genome , scaffold LG50) nt  
Cau. A22G0009890 (PREDICTED: PDZK1-interacting protein 1-like )

27517127-27522549  
Cau. A22G0009900 (PREDICTED: inaD-like protein )  
Cau. A22G0009910 (hypothetical protein cypCar\_00028161, partial )



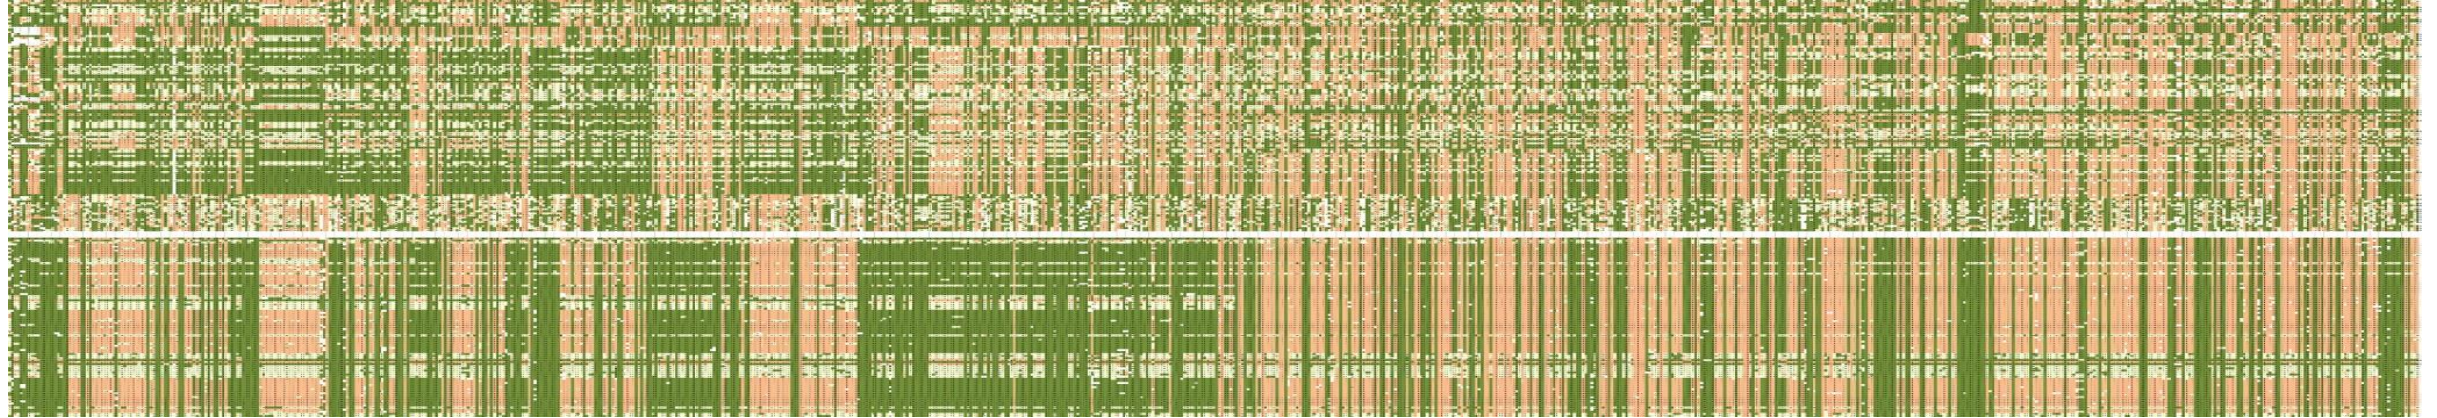

29651200—29663200

Cau. A22G0009960 (hypothetical protein cypCar\_00031523, partial )

29676200—29719000

Cau. A22G0010990 (PREDICTED: RGM domain family member B-like )

Cau. A22G0011000 (PREDICTED: CUGBP Elav-like family member 5 isoform X5 )

Cau. A22G0011010 (hypothetical protein cypCar\_00006850, partial )

Cau. A22G0011020 (hypothetical protein cypCar\_00006850, partial )

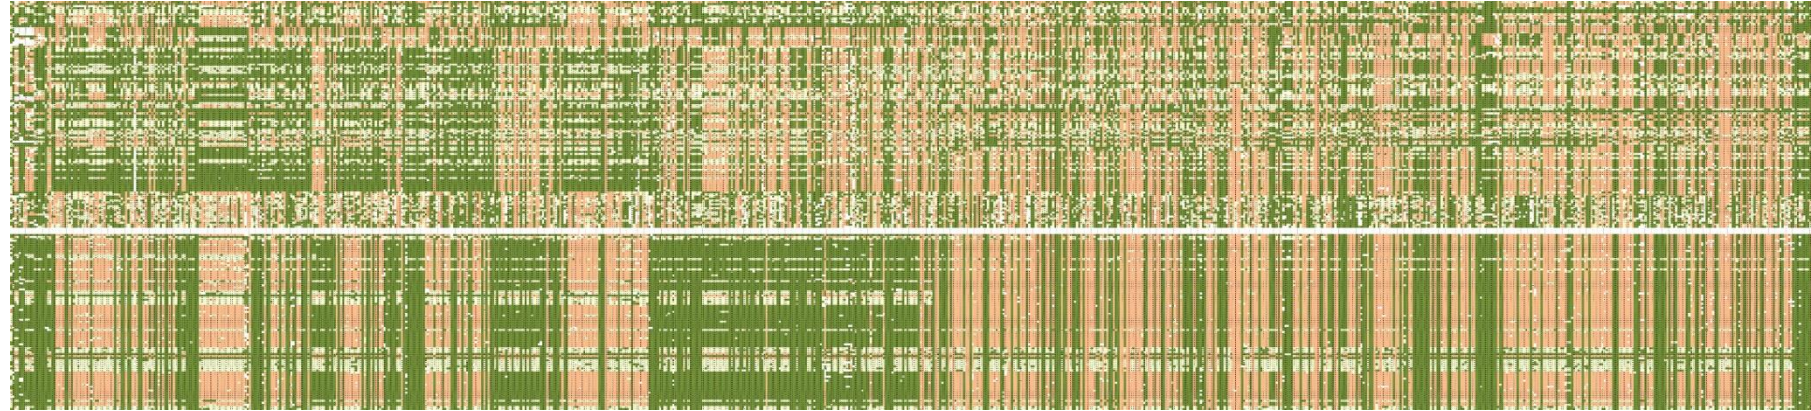

29651200—29663200  
Cau. A22G0009960

29676200—29719000  
Cau. A22G0010990 (Repulsive guidance molecule A)  
Cau. A22G0011000 (CUGBP Elav-like family member)  
Cau. A22G0011010 (CUGBP Elav-like family member)  
Cau. A22G0011020 (CUGBP Elav-like family member)



Chr22\_3A31789505-32062932-1

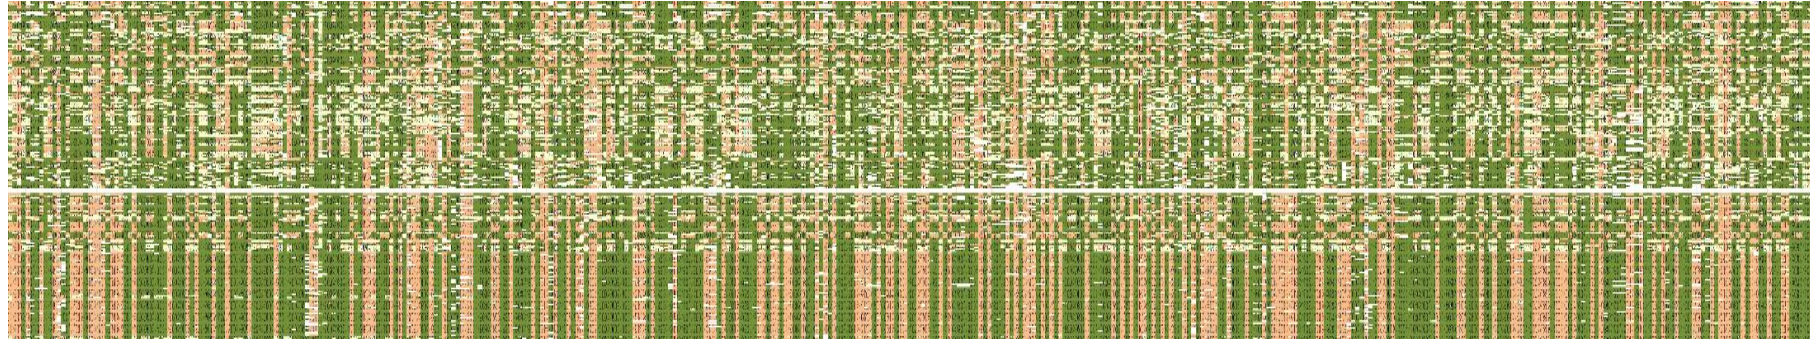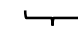

31948000—31988000  
Cau. A22G0012340

Chr22\_3A31907731-32217085-1

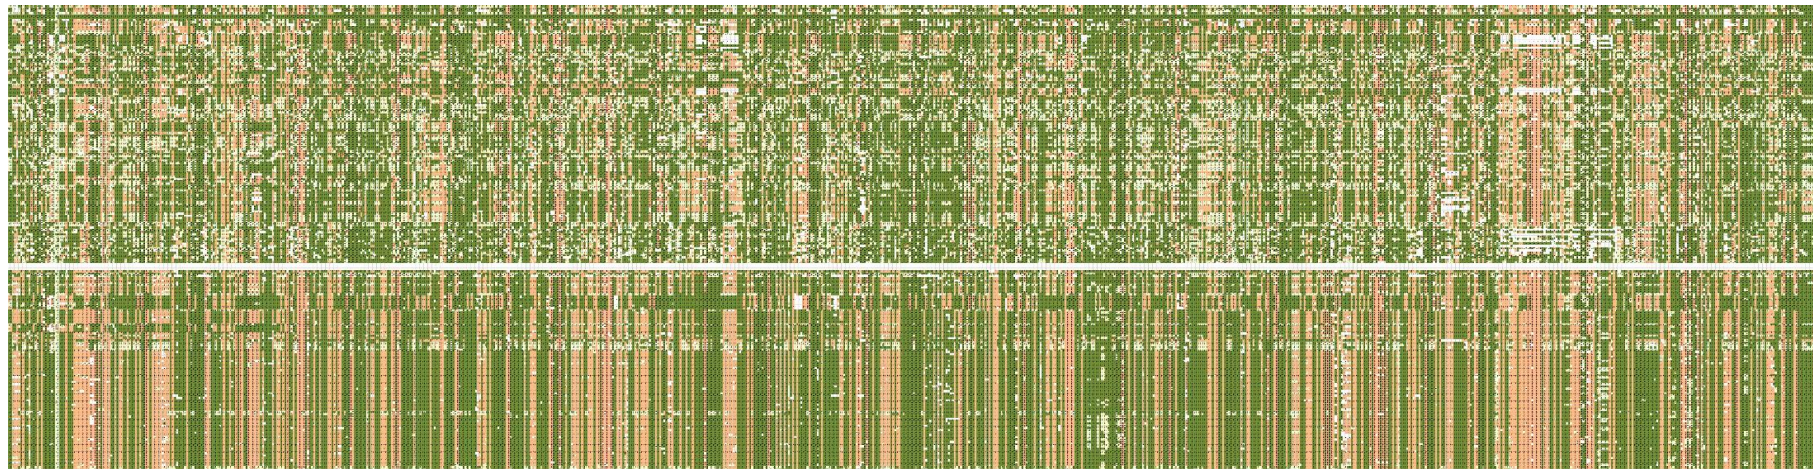

└

32178415-32189151  
Cau. A22G0012380



Chr22\_3A33581810-33846792-1

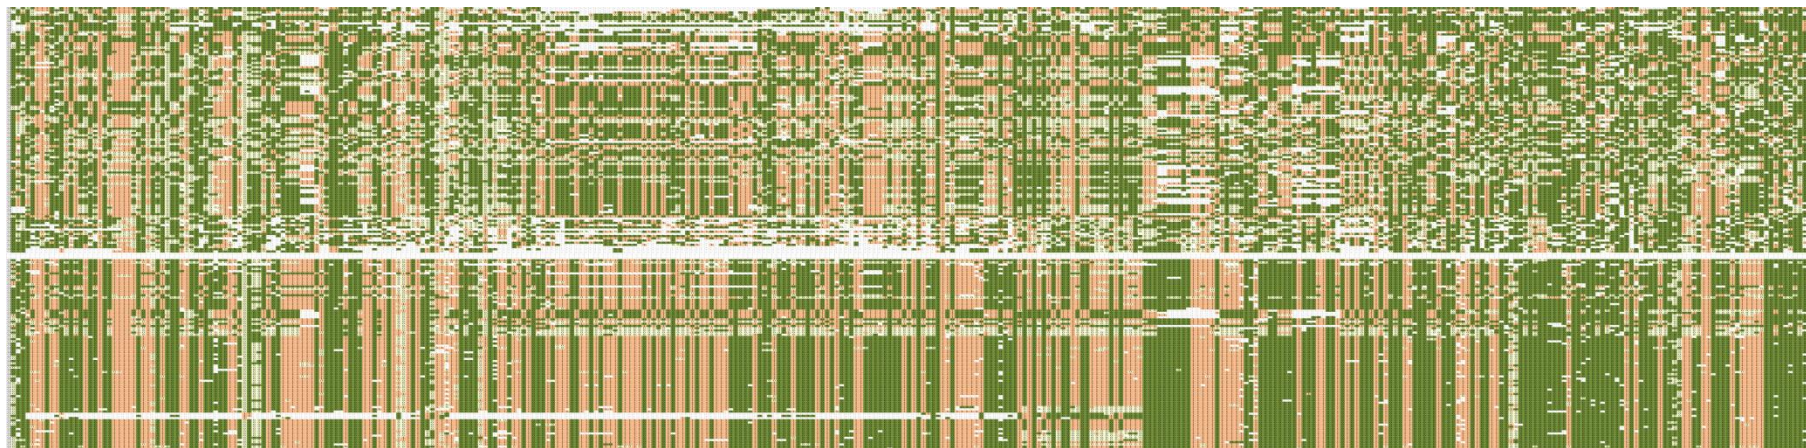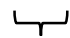

33747400—33757400  
non-coding

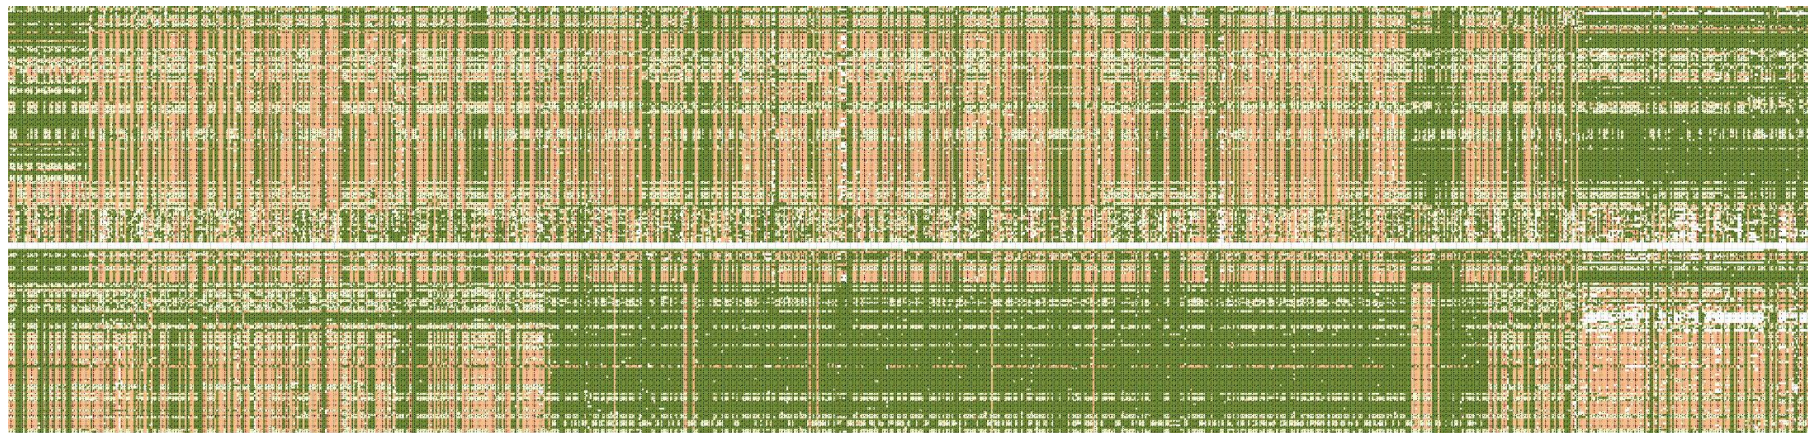

31477000—3160980

Cau. B05G0015260 (ligase III, DNA, ATP-dependent

Cau. B05G0015270

Cau. B05G0015280 (transmembrane protein 248)



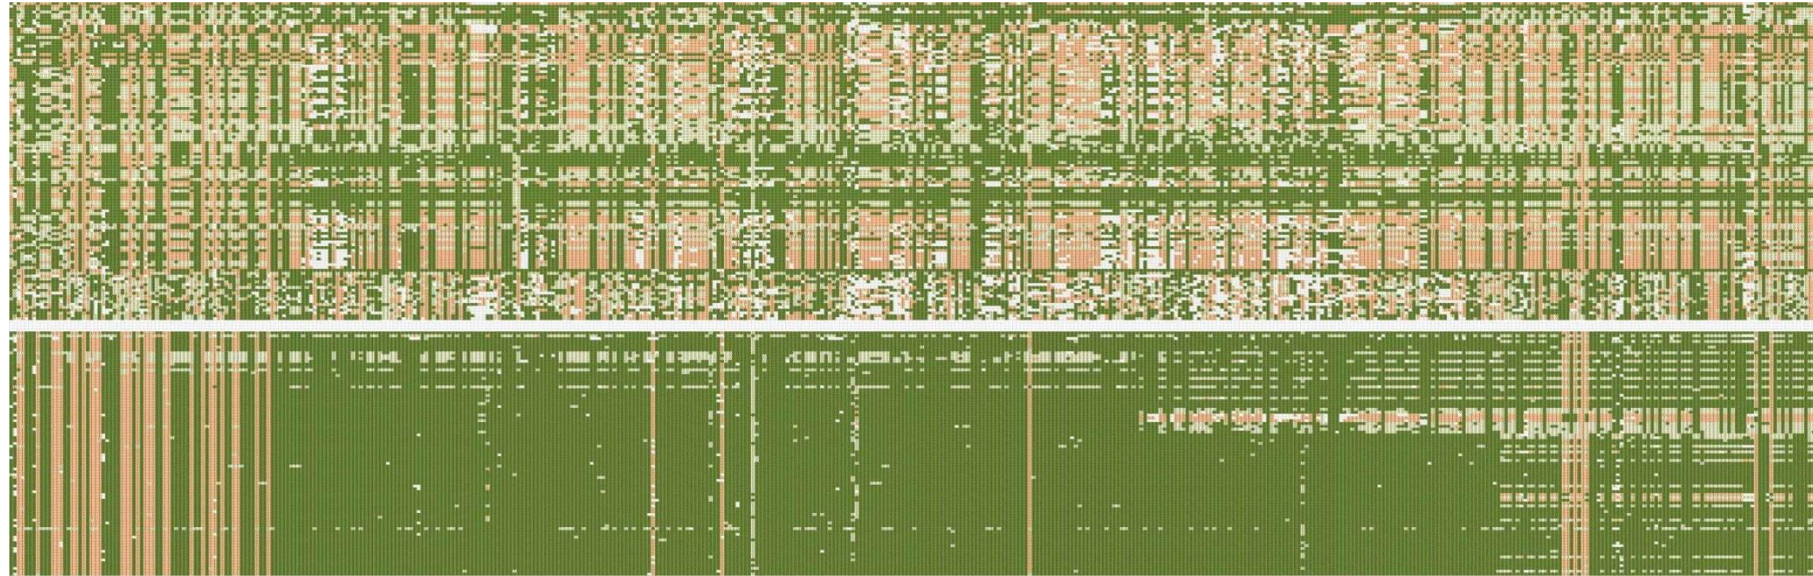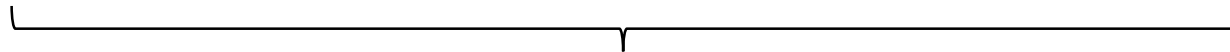

37677000—37870000

Cau.B05G0017210 (ribosomal protein S6 kinase, polypeptide 4)

Cau.B05G0017220 (retinal outer segment membrane protein 1a)

Cau.B05G0017230 (transgelin 3a)



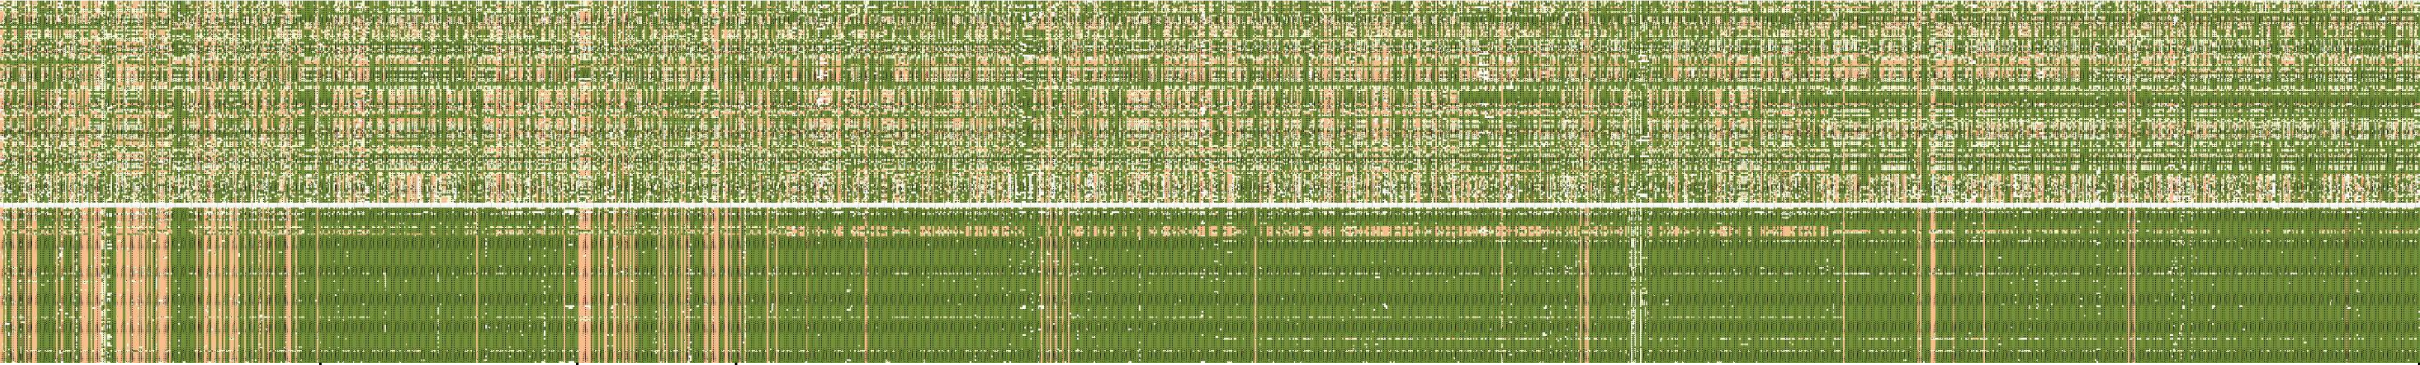

7765073-7768401  
non-coding

7791891-8016604  
Cau.B07G0004450 (inner mitochondrial membrane peptidase subunit 1)  
Cau.B07G0004460 (elongator acetyltransferase complex subunit 4)



Chr32\_3A8976137-9221207-1

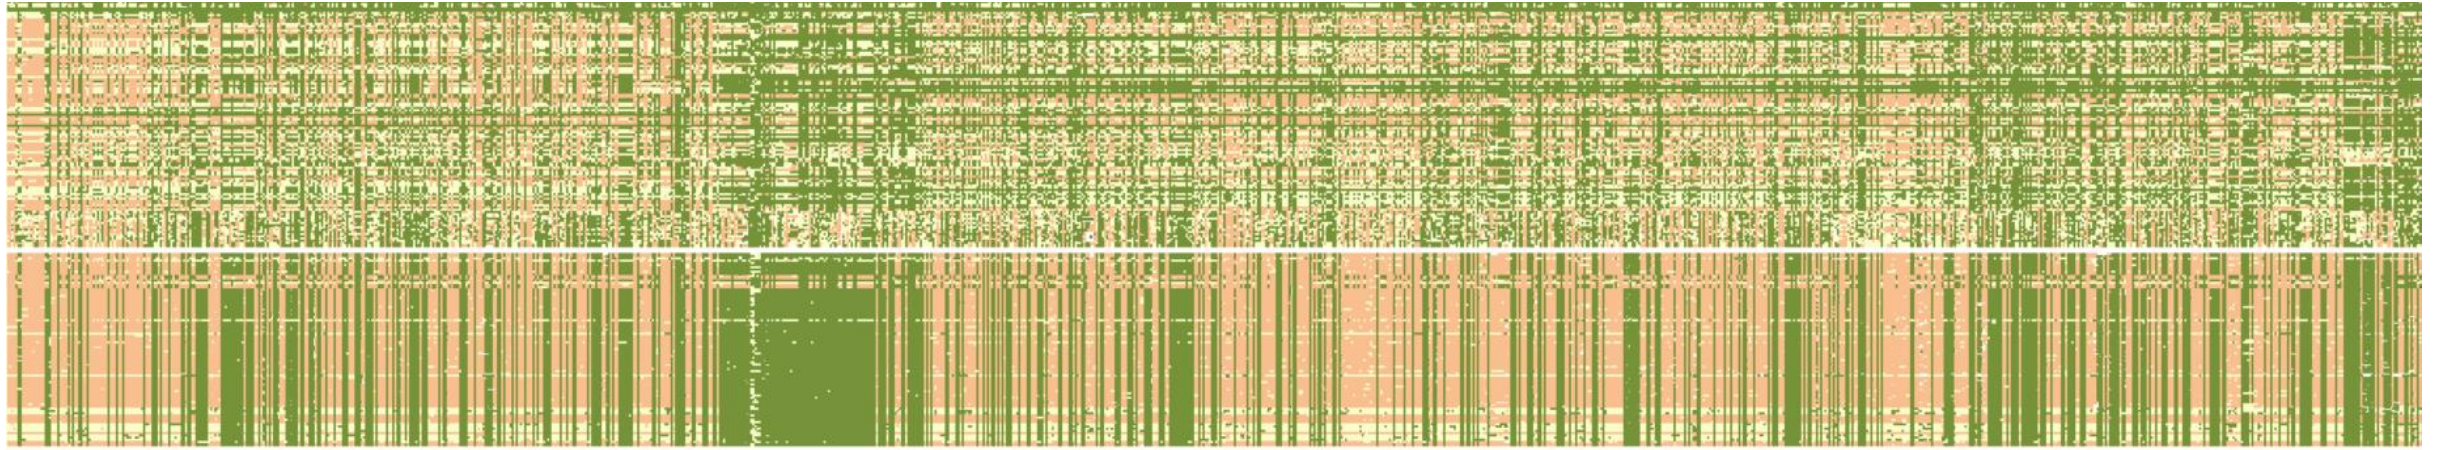

9012897-9002430  
non-coding



Chr32\_3A14417750-14826182-1

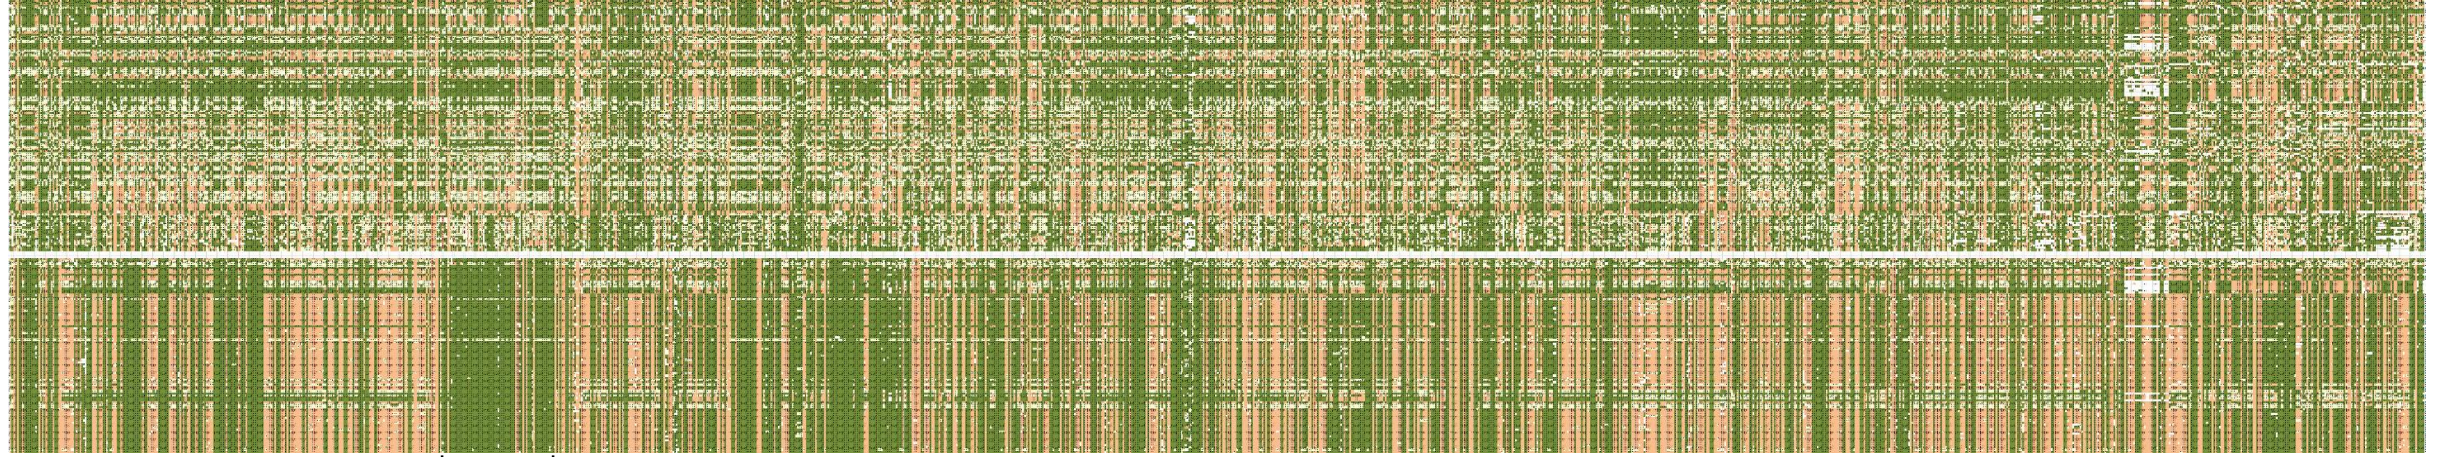

14456040-14466250  
non-coding

14481567-14494331  
non-coding



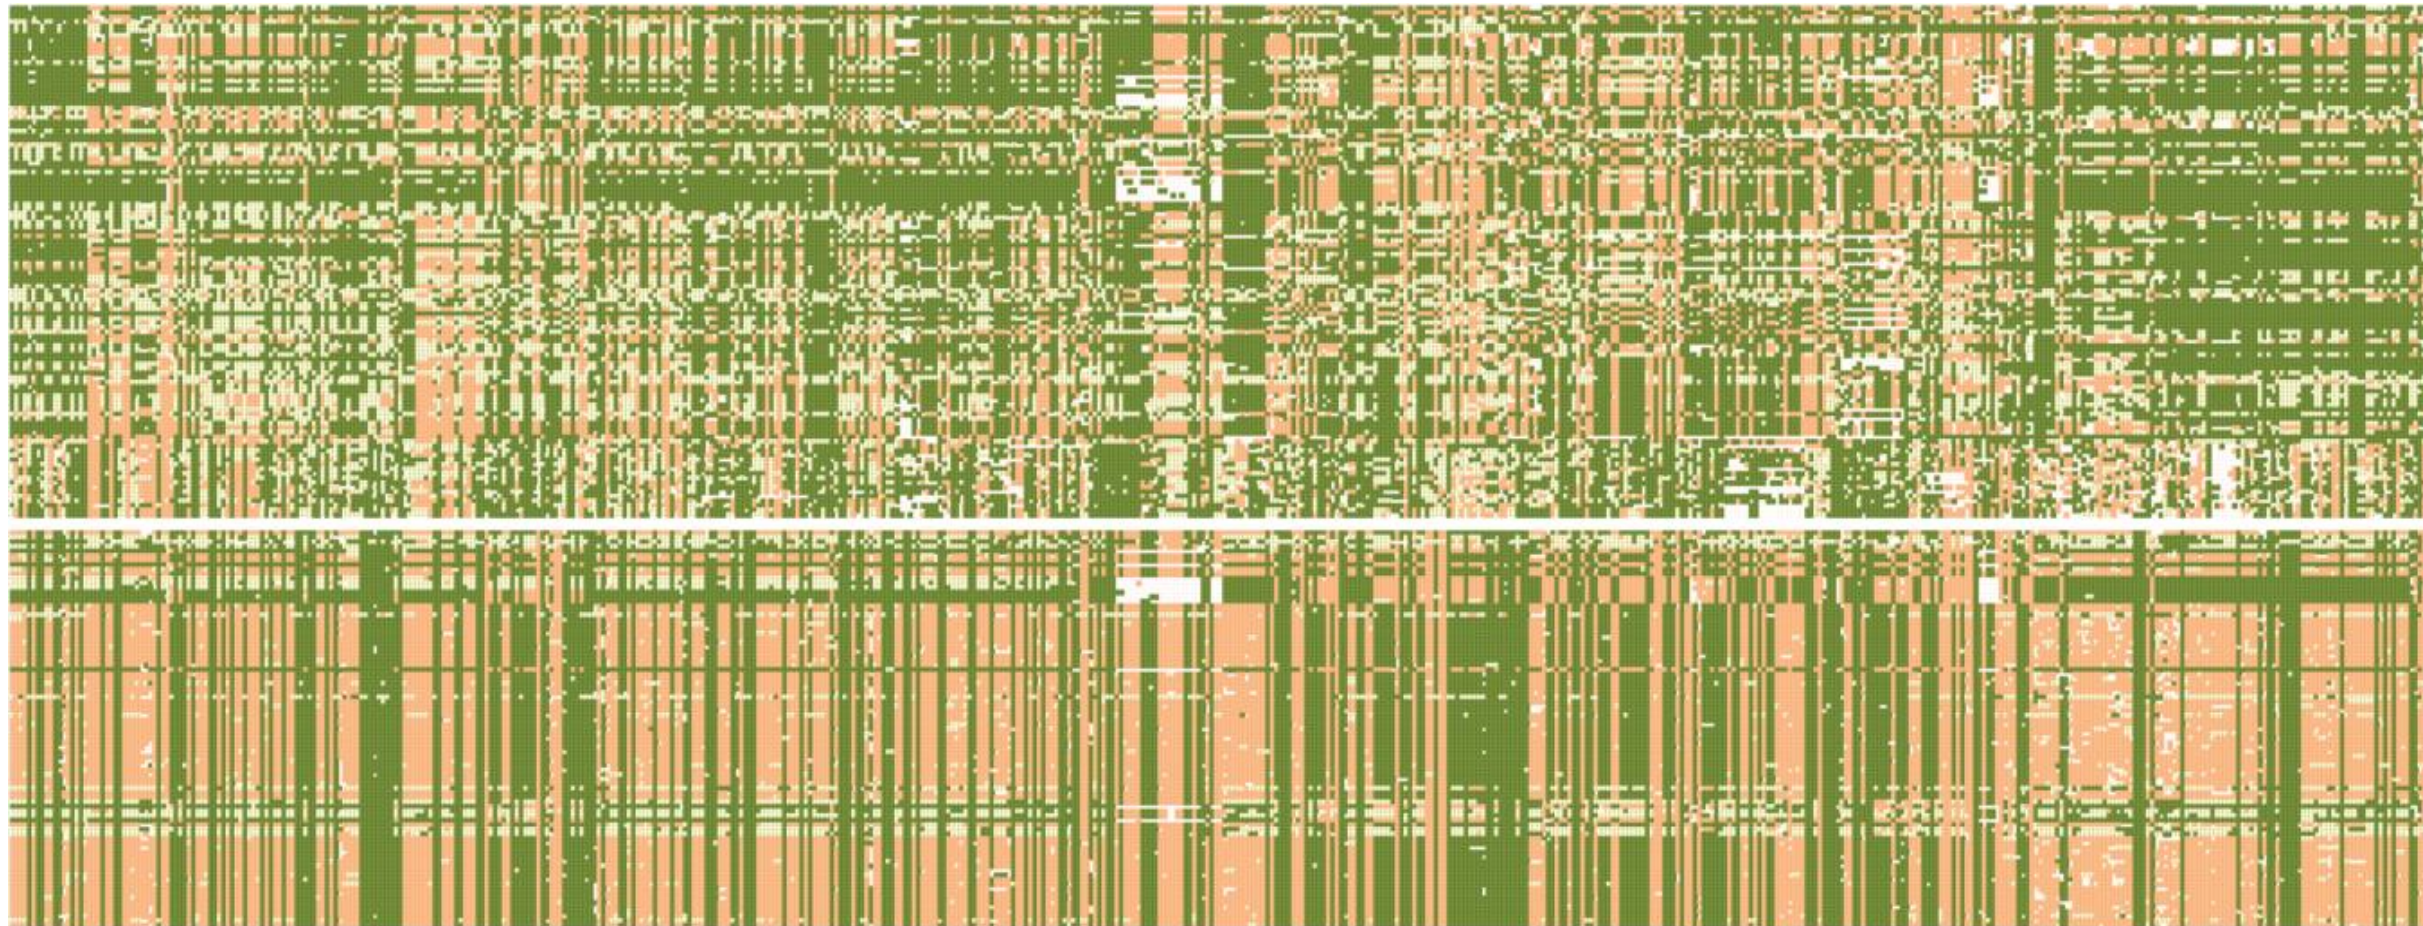

┌  
14714762-14719383  
non-coding



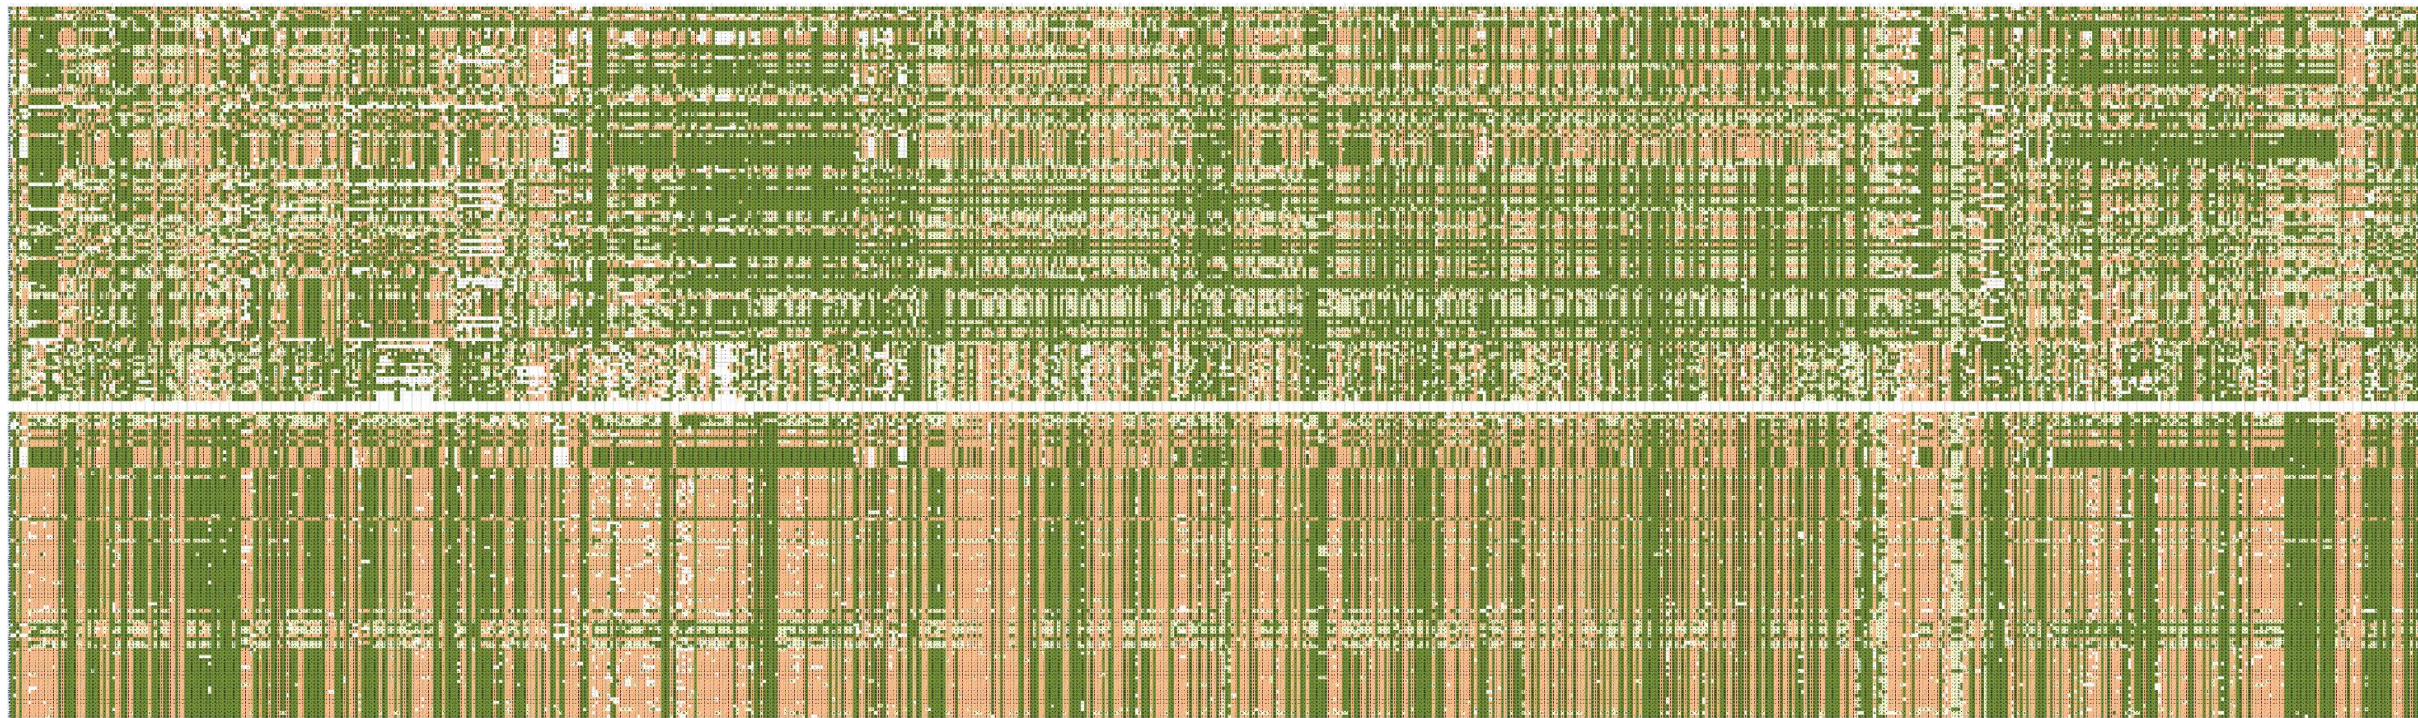

14756944-14764595  
non-coding

15216019-15228261  
Gau. B07G0006540  
(vacuolar protein  
sorting 13 homolog C  
(*S. cerevisiae*))



Chr32\_3A15220877-15649407-1

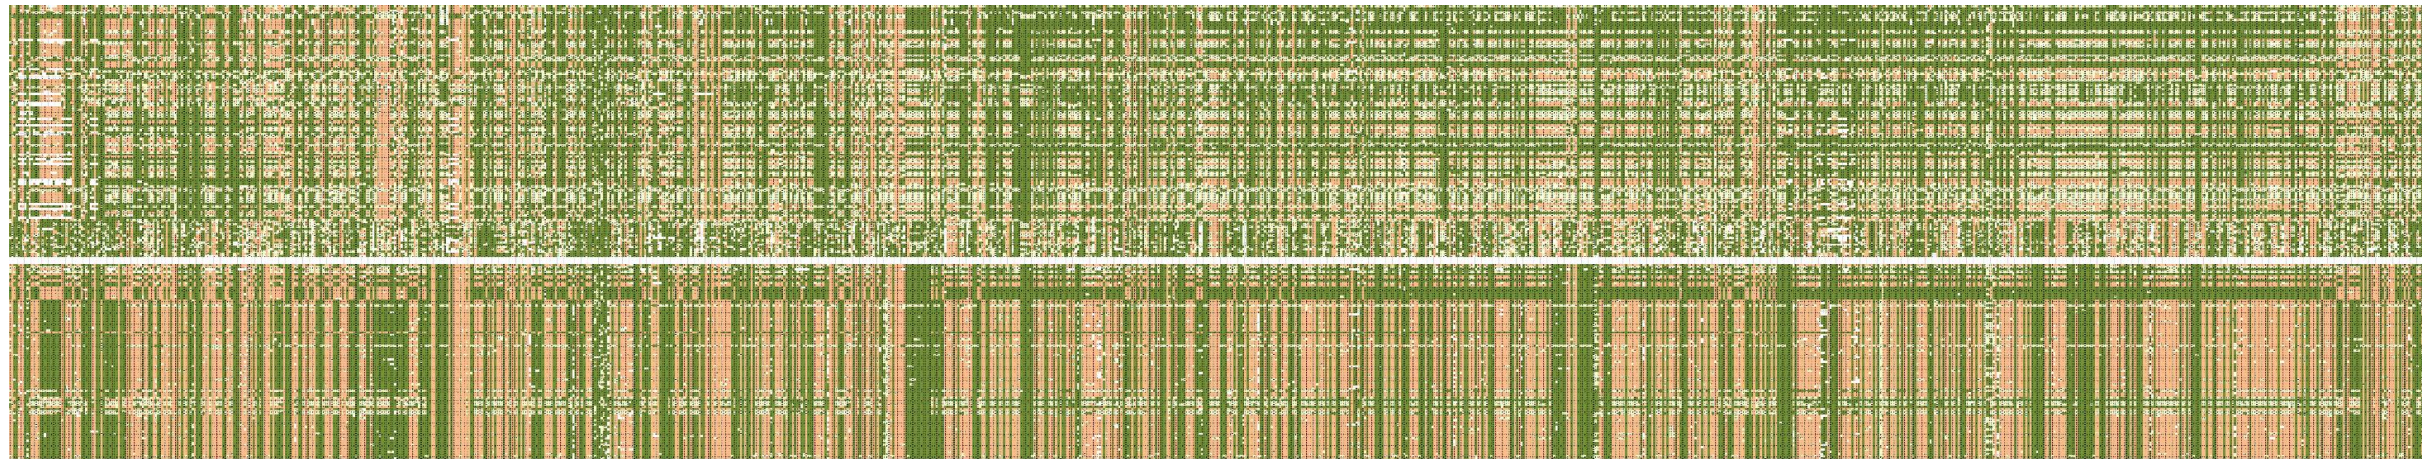

15298548-15303904

Cau. B07G0006540 (vacuolar protein sorting 13 homolog C (S.  
cerevisiae))



Chr32\_3A15449787-15839456-1

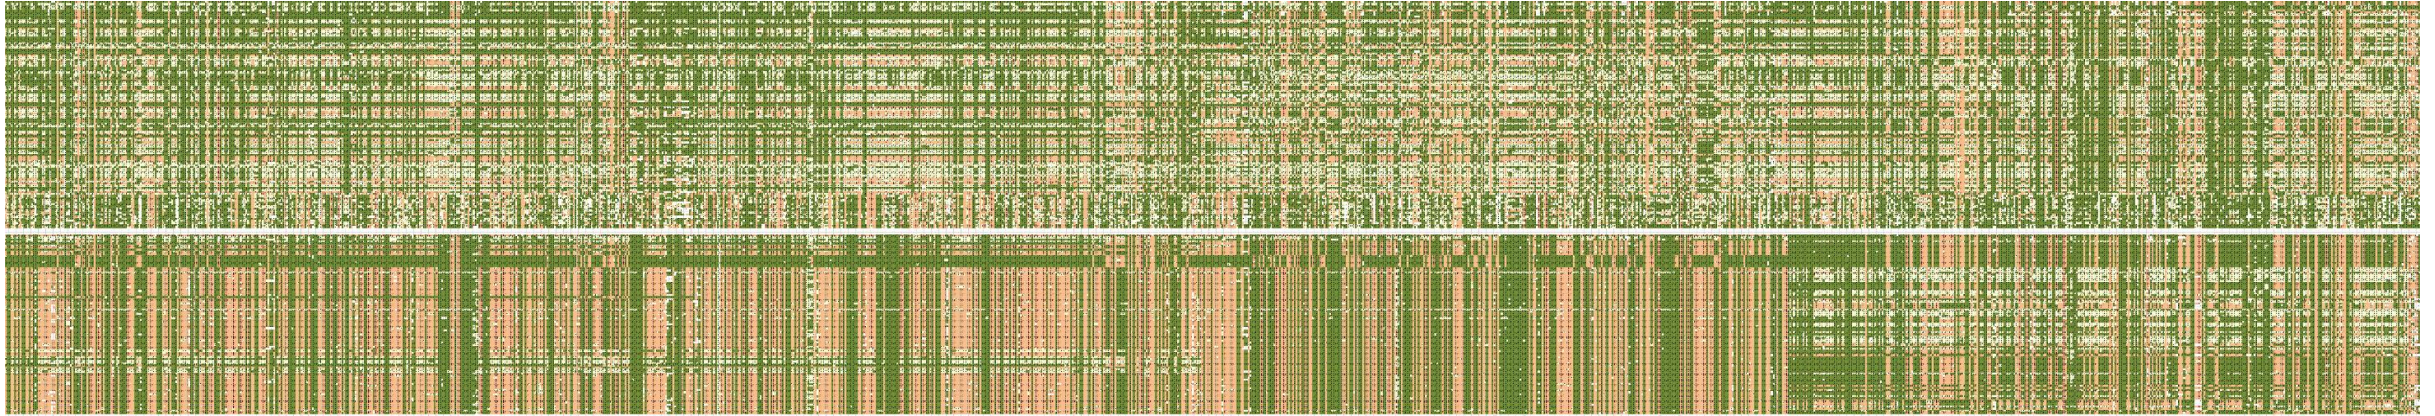

15687241-15693329    15763810-15769898  
Cau. B07G0006830    non-coding  
hypothetical protein



Chr36\_3A9832134-10065956-1

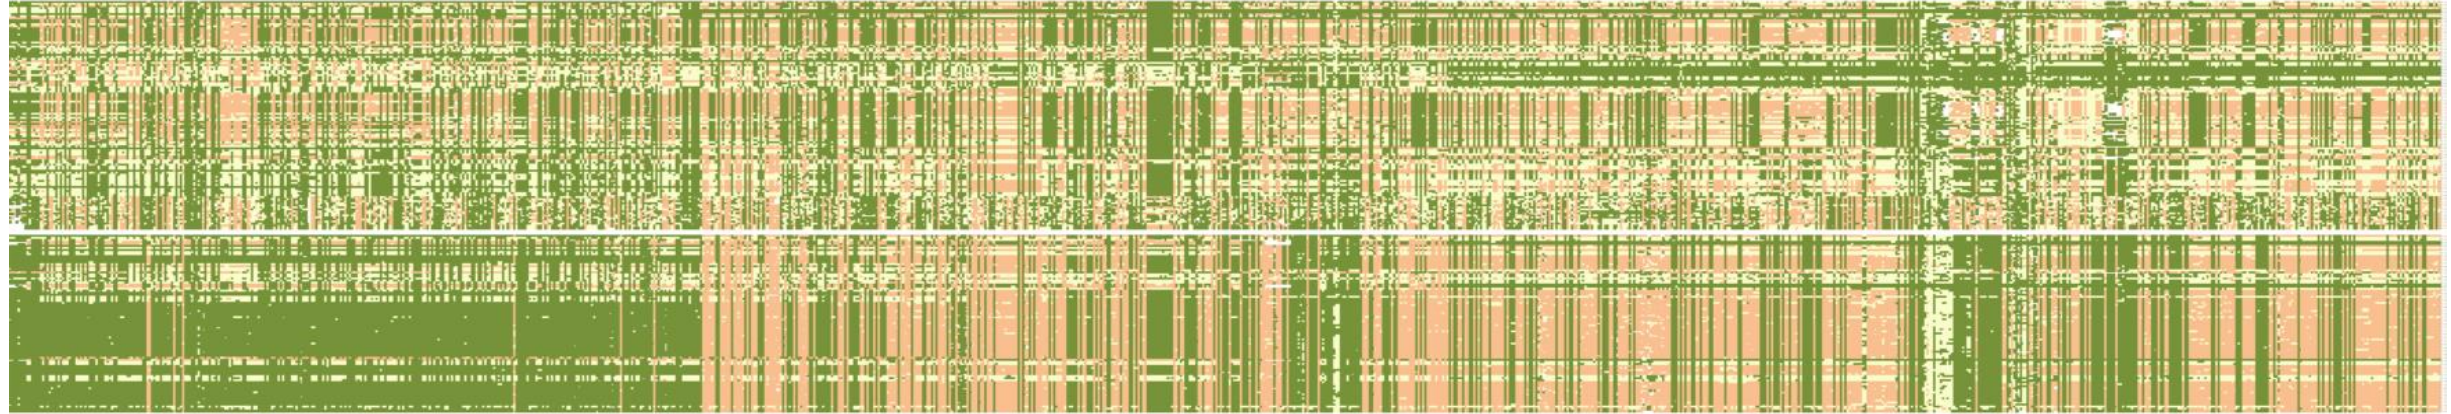

9832134-9897896  
non-coding



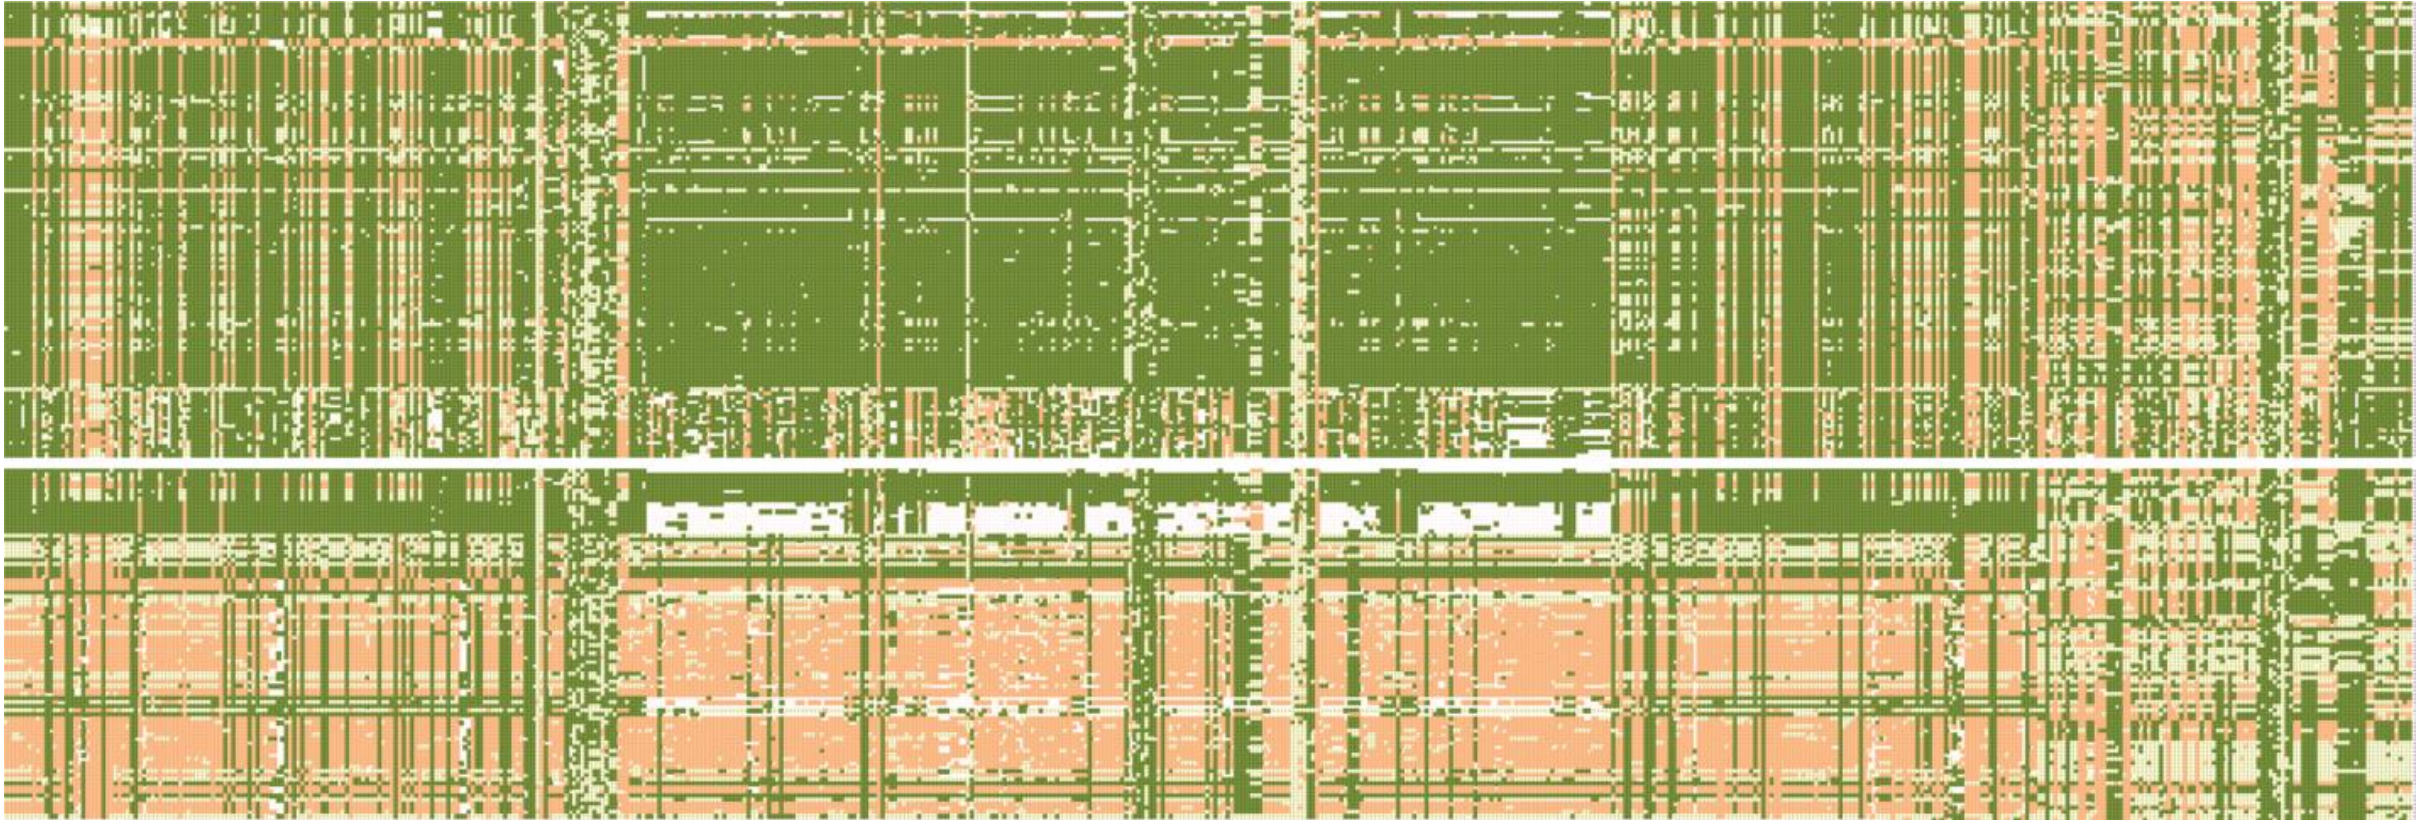

180664-306863

Cau. B13G0000120

Cau. B13G0000130

Cau. B13G0000140

Cau. B13G0000150

Cau. B13G0000160

Cau. B13G0000170

Cau. B13G0000180

Cau. B13G0000190

Cau. B13G0000200

Cau. B13G0000210

Cau. B13G0000220



Chr38\_3A504633-746219-1

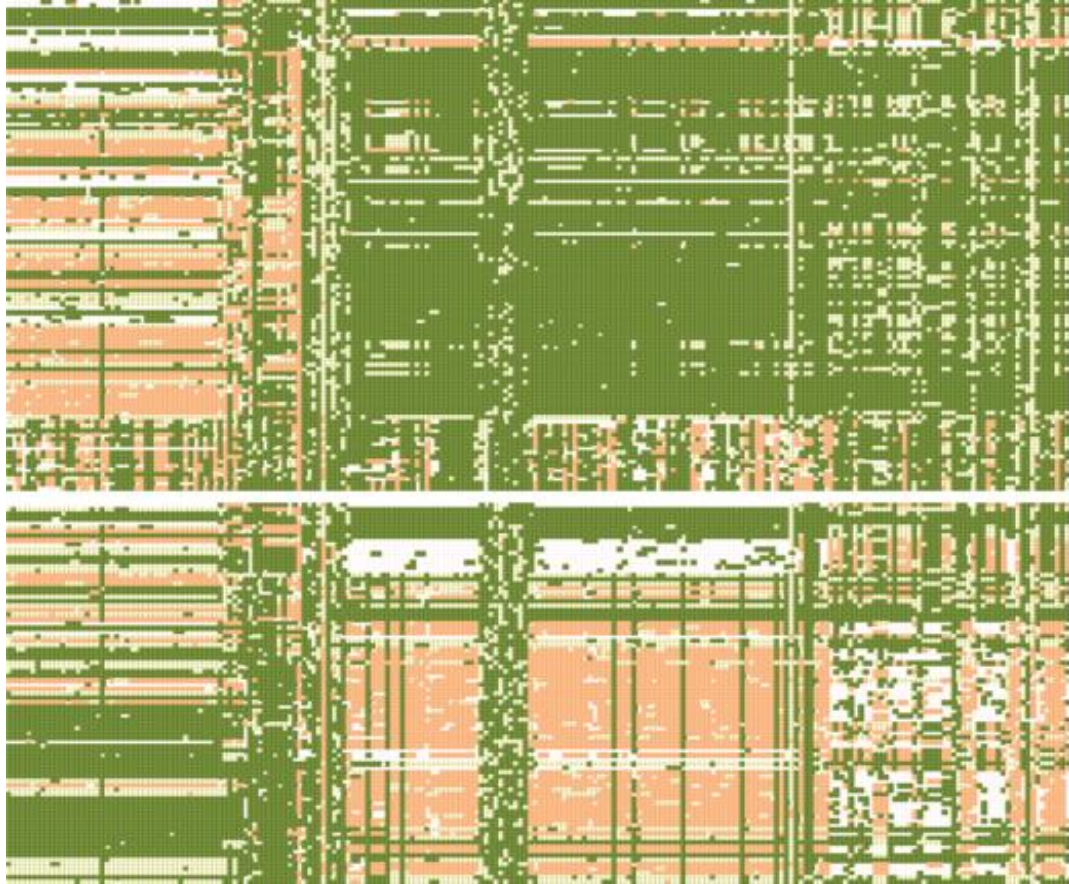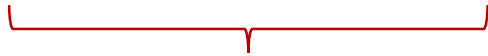

573000-677194  
Cau. B13G0000310  
Cau. B13G0000320  
Cau. B13G0000330  
Cau. B13G0000340



Chr38\_3A898659-1138584-1

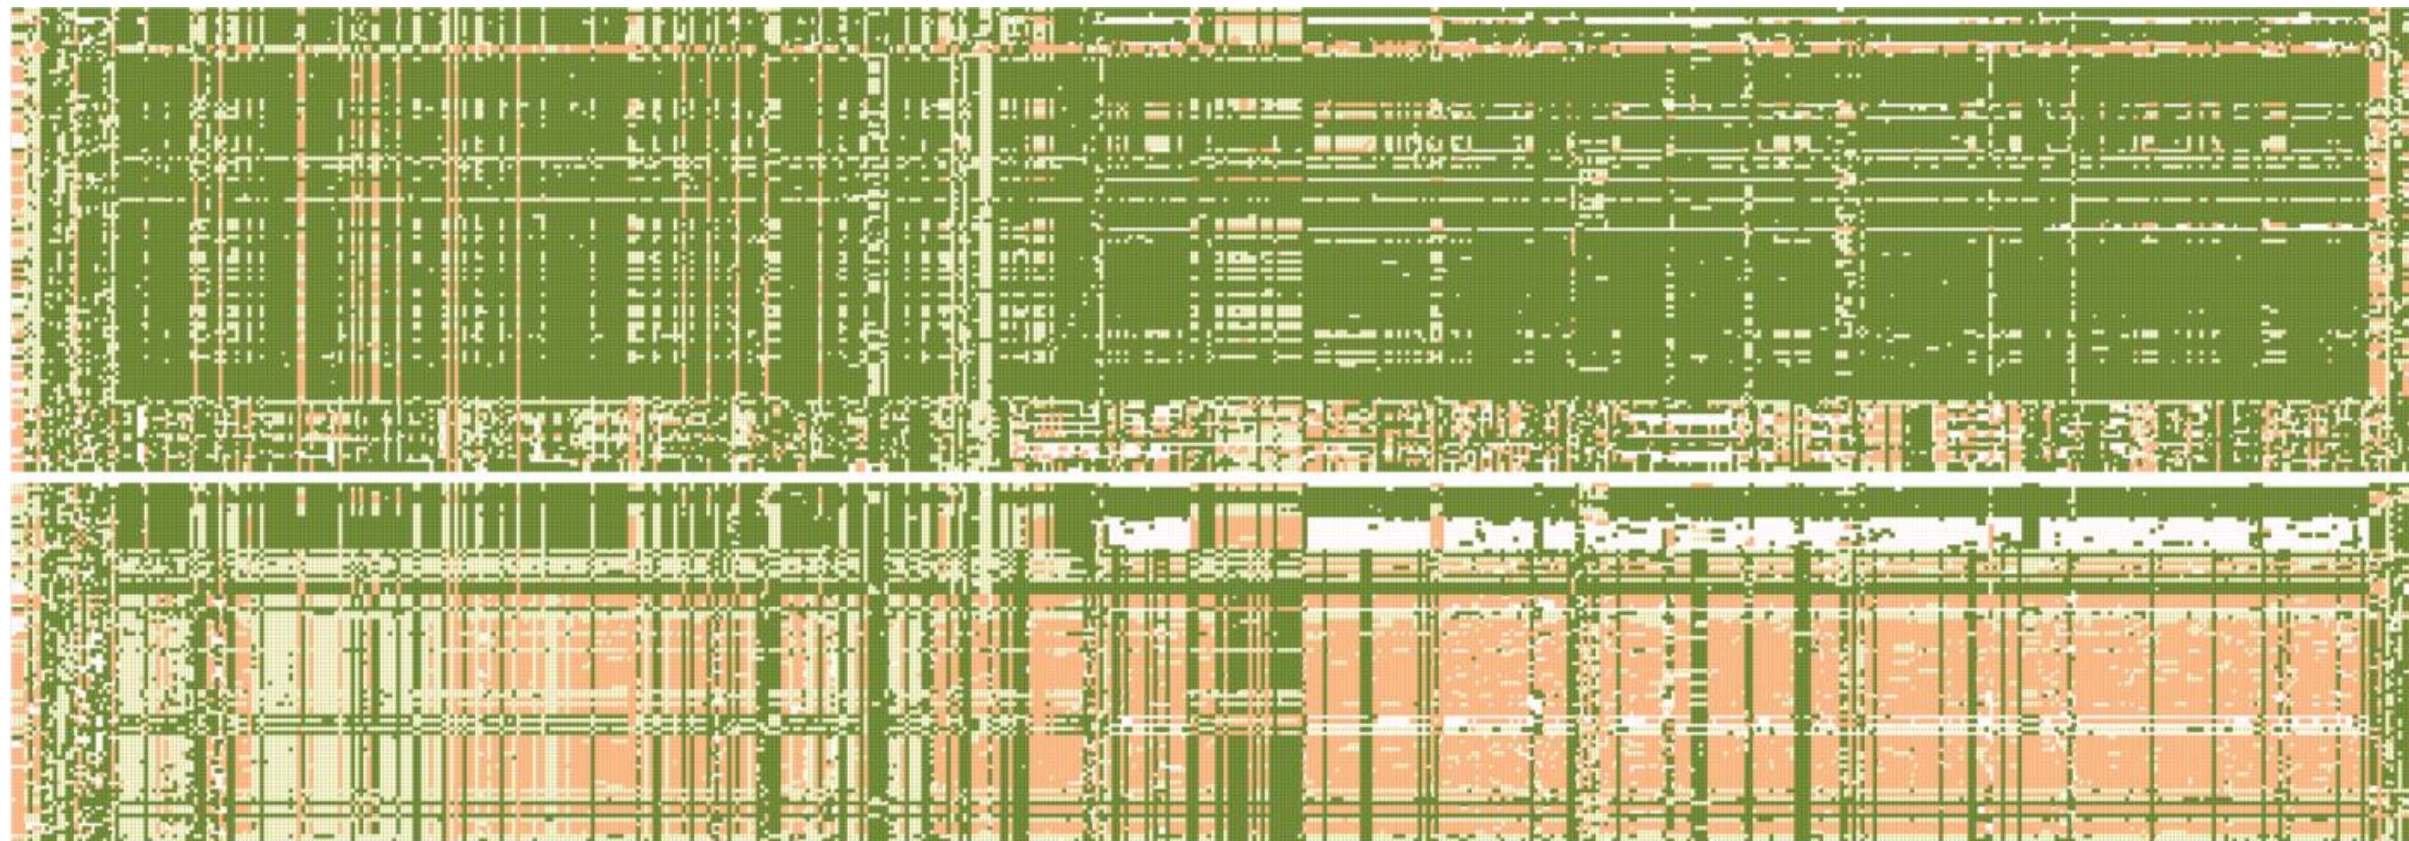

1034616-1130000  
Cau. B13G0000420



Chr38\_3A3388658-3630016-1

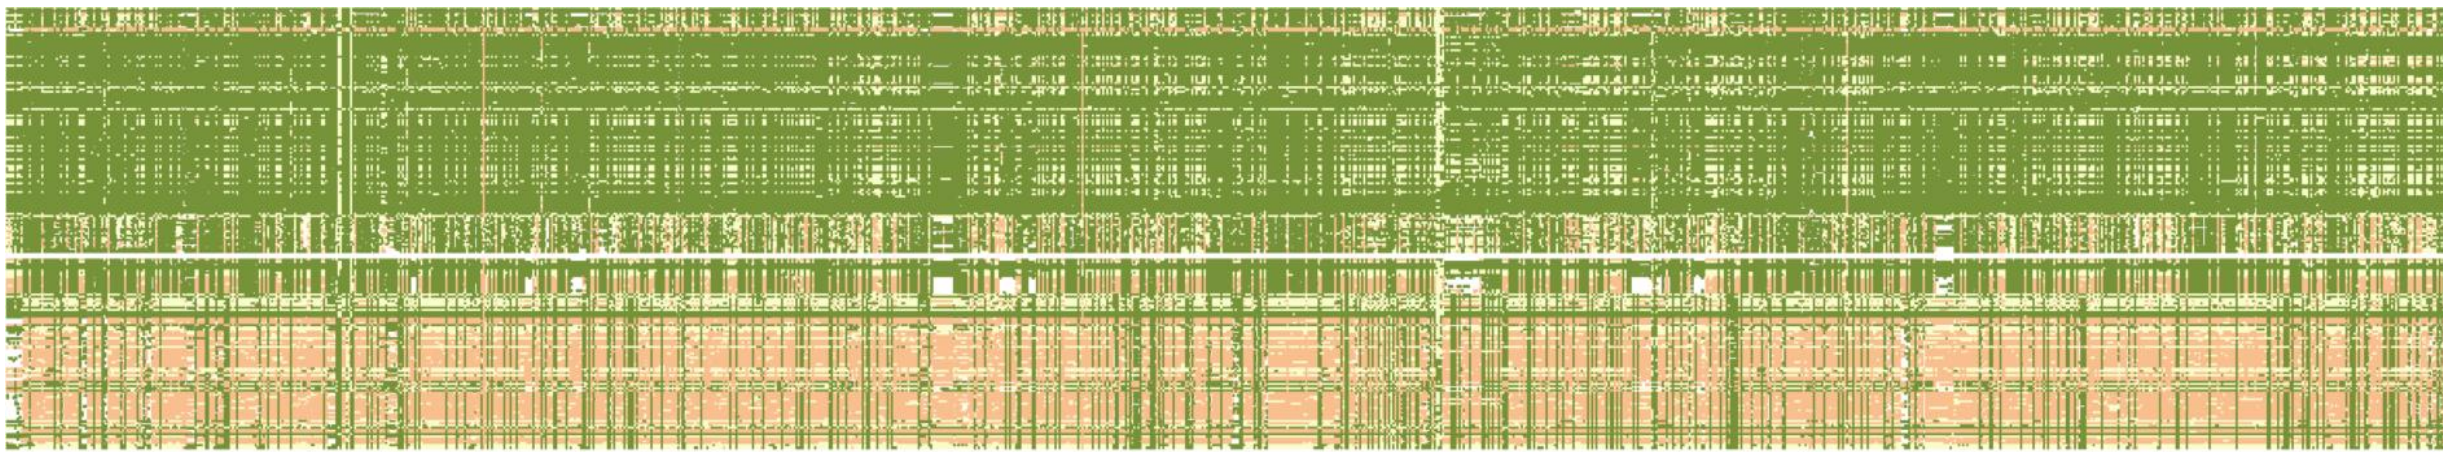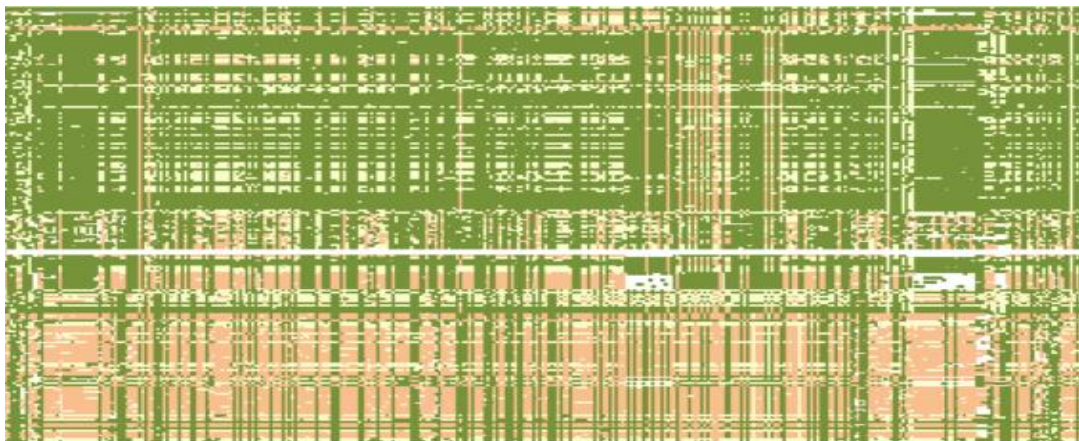

Cau. B13G0000420



Chr38\_3A27977603-28256214-1

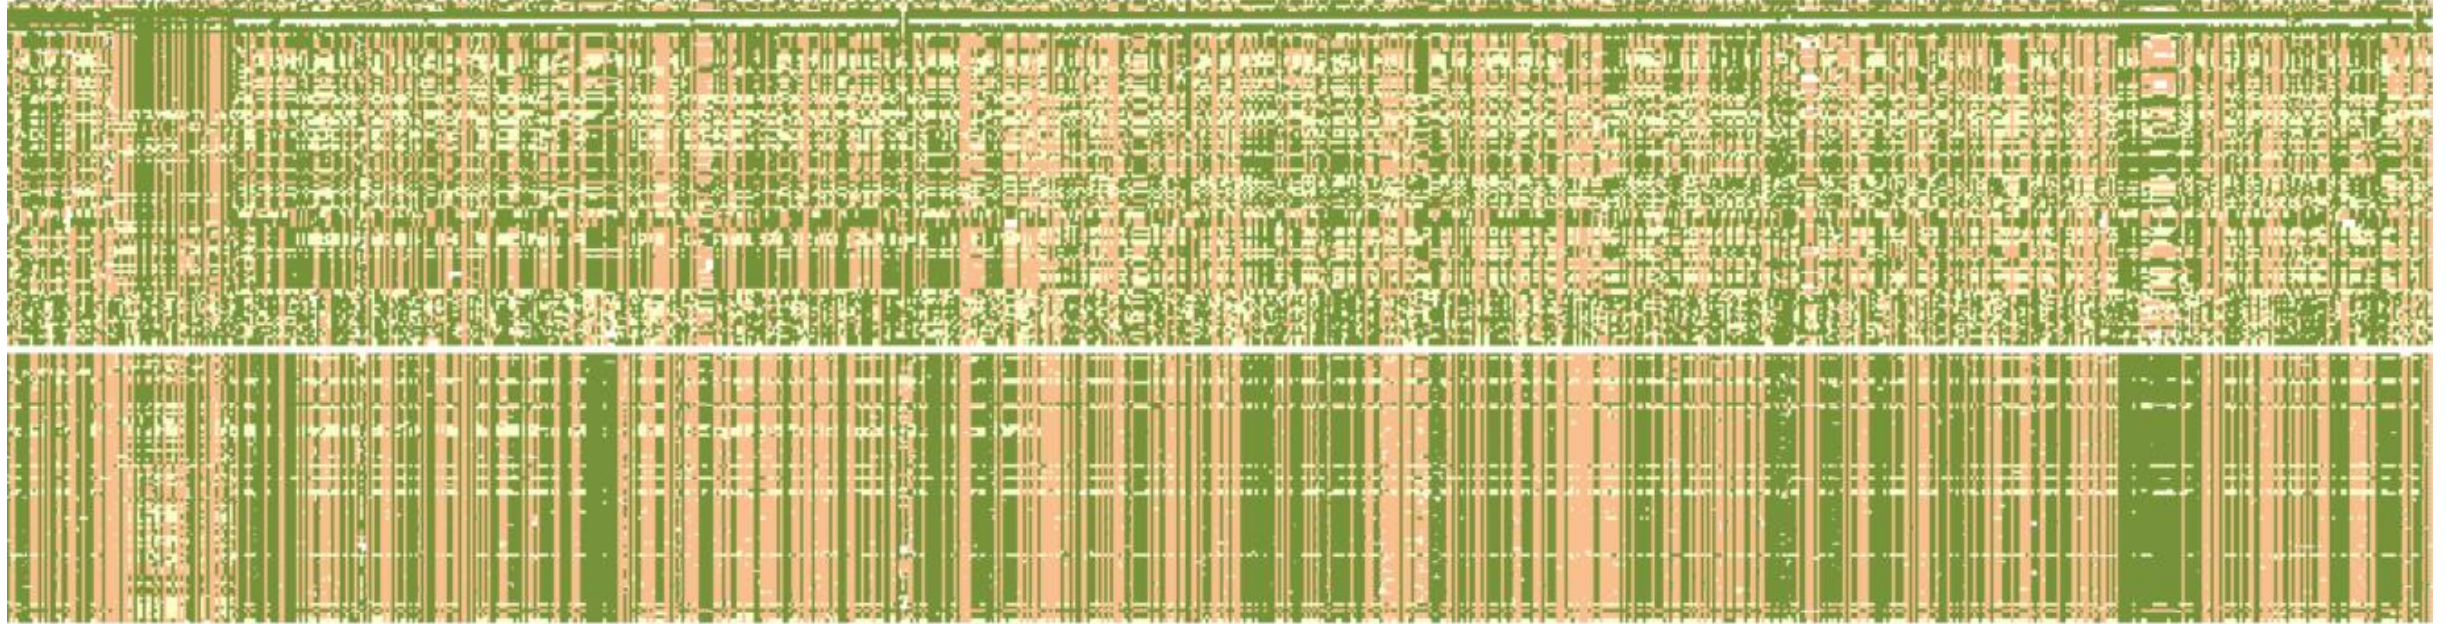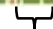

28047255-28051608  
non-coding

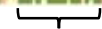

28221387-28238800



Chr38\_3A28115593-28360539-1

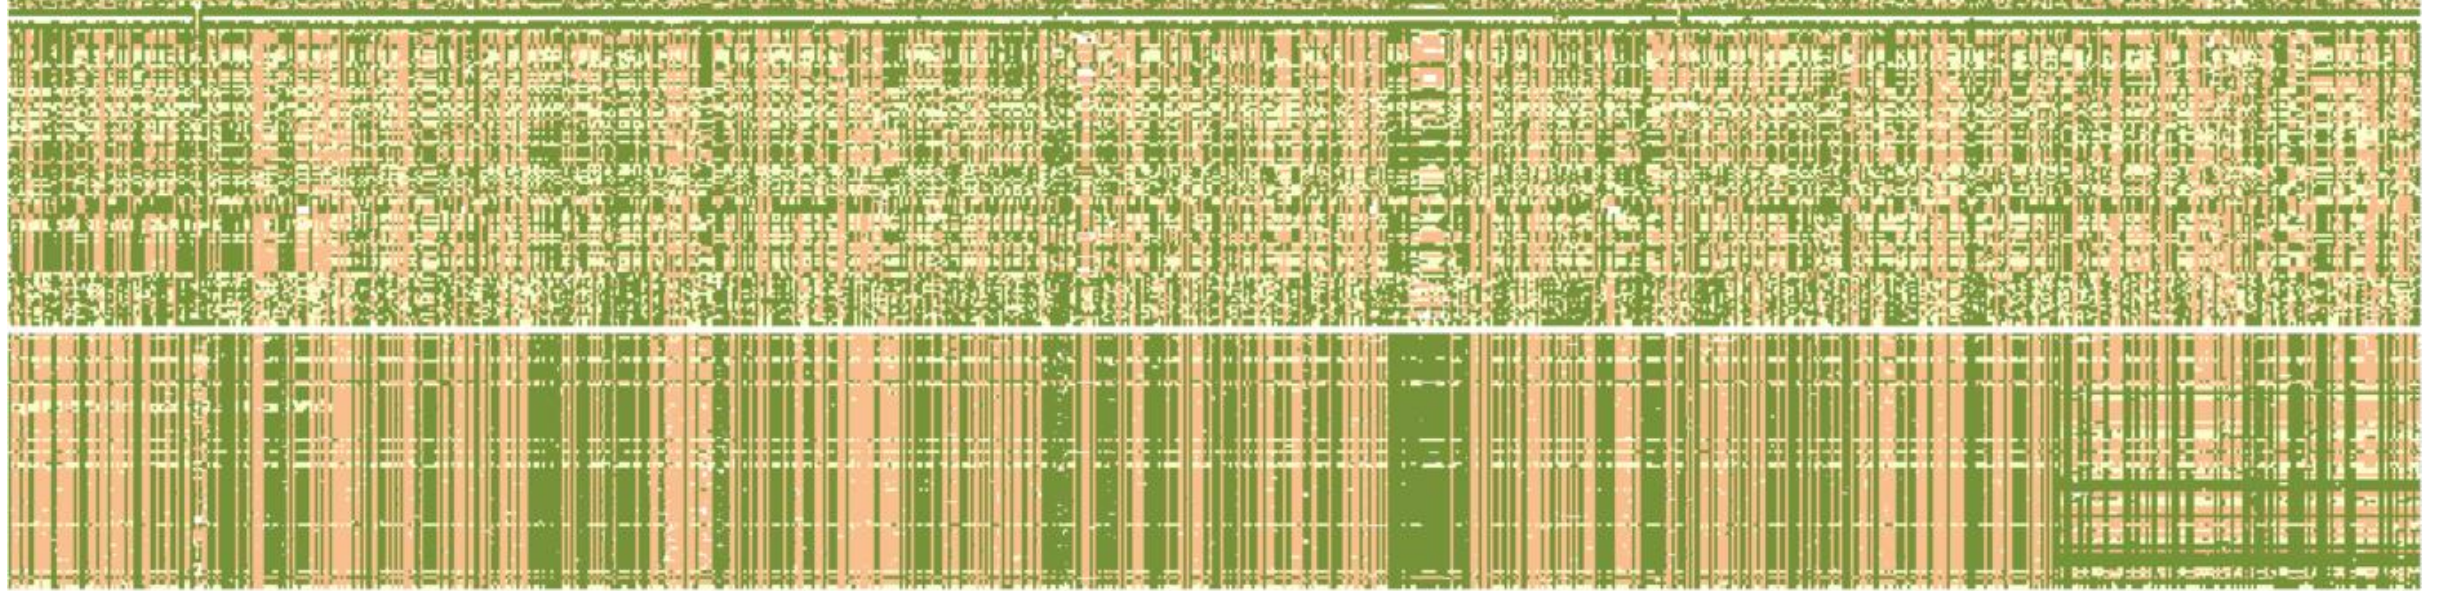

28253375-28268684  
Cau. B13G0010420  
Cau. B13G0010430



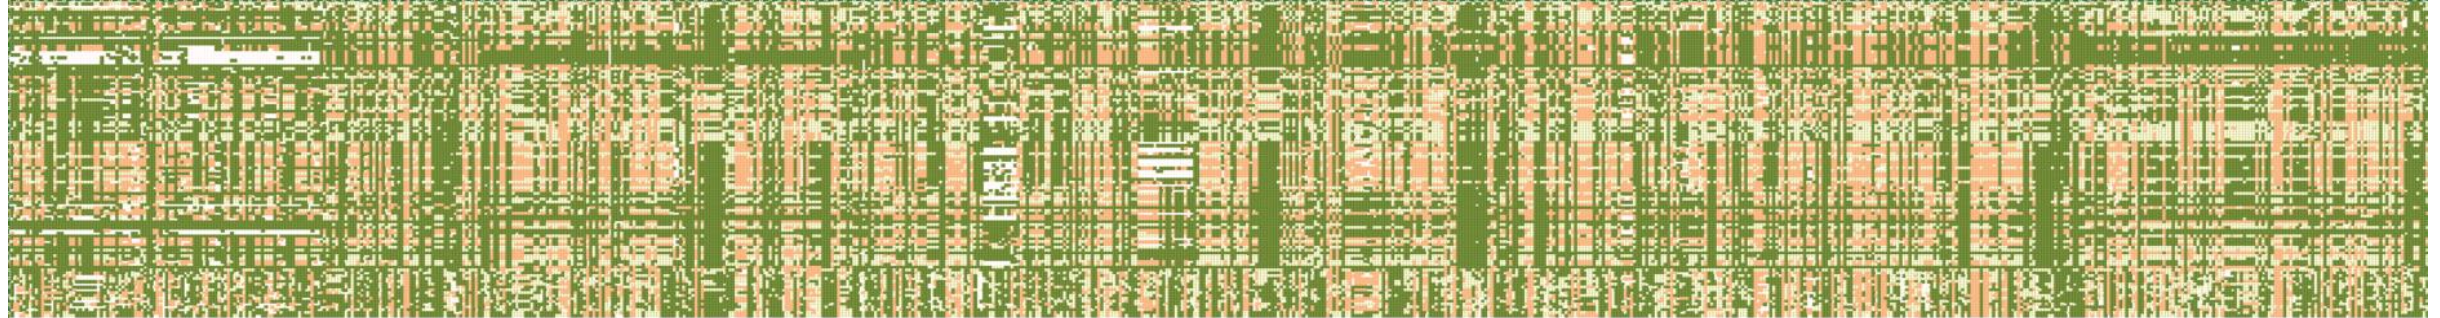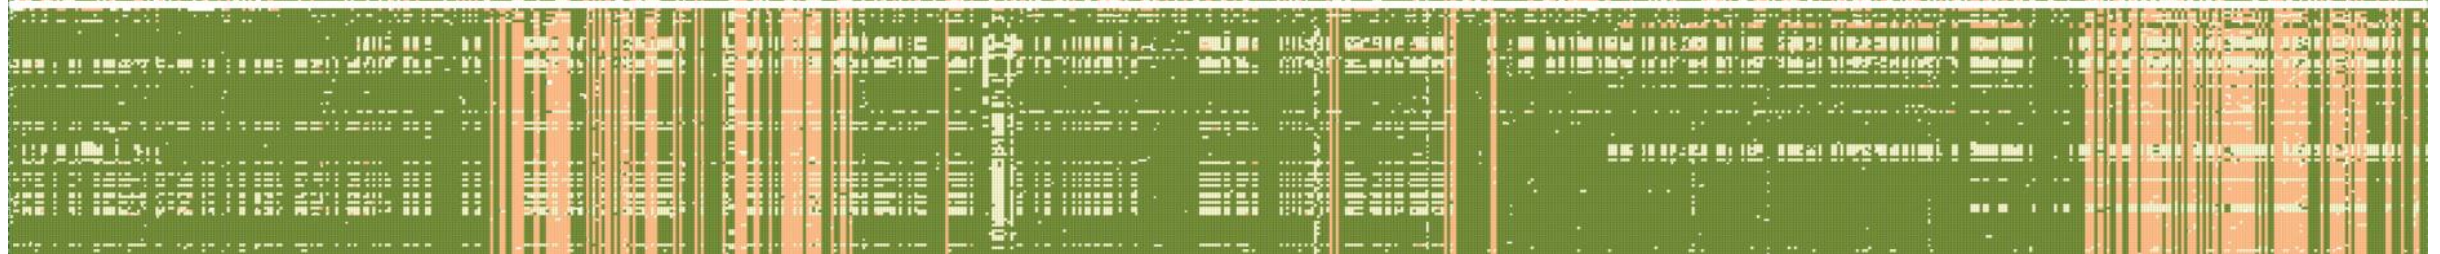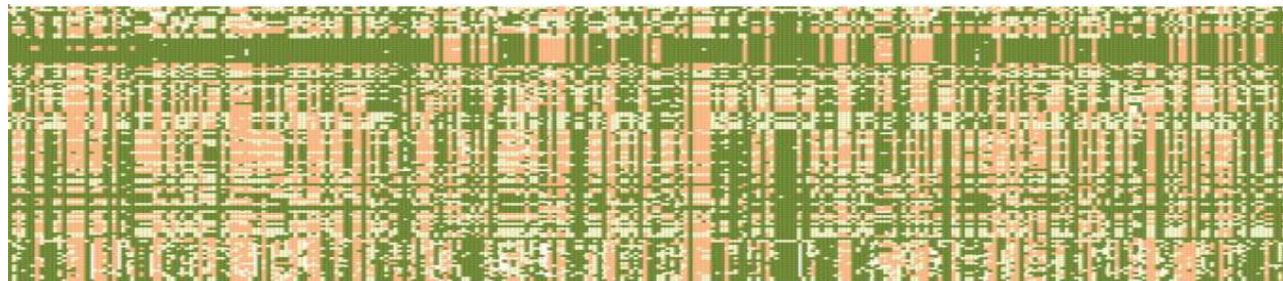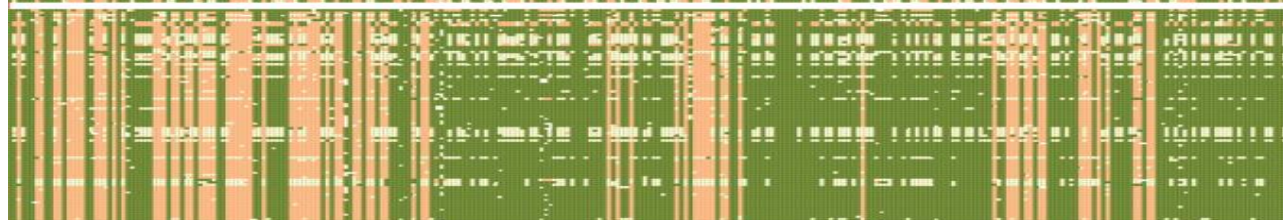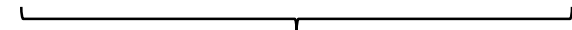

18932423-18933613

Cau. B23G0008190
